# Supplementary material for: Transcriptome Analysis of White- and Red-Fleshed Apple Fruits Uncovered Novel Genes Related to the Regulation of Anthocyanin Biosynthesis
Source: Int J Mol Sci. 2024 Feb 1;25(3):1778. doi: 10.3390/ijms25031778 (PMC10855924; doi:10.3390/ijms25031778)
Supplement: Supplementary file 1 [file ijms-25-01778-s001.zip]

Archive with 12 entries (12 files):
- Supplementary Figure S1.png
- Supplementary Figure S2.png
- Supplementary Figure S3.png
- Supplementary Figure S4.png
- Supplementary Figure S5.png
- Supplementary Figure S6.jpg
- Supplementary Table S1.xlsx
- Supplementary Table S2.xls
- Supplementary Table S3.xls
- Supplementary Table S4.xlsx
- Supplementary Table S5.xlt
- Supplementary tables and figures captions.pdf
