# Supplementary material for: Transcriptome Analysis of White- and Red-Fleshed Apple Fruits Uncovered Novel Genes Related to the Regulation of Anthocyanin Biosynthesis
Source: Int J Mol Sci. 2024 Feb 1;25(3):1778. doi: 10.3390/ijms25031778 (PMC10855924; doi:10.3390/ijms25031778)
Supplement: Supplementary file 1 [file ijms-25-01778-s001.zip › Supplementary Table S2.xls]

gene_id	Early_Fuji_1	Early_Fuji_2	Early_Fuji_3	Red_Love_1	Red_Love_2	Red_Love_3	gene_symbol	description	GO_id	GO_term	pathway	pathway_description
ABI3L1	0.112753	0.0870688	0.126782	0	0	0	Os03g0120900	B3 domain-containing transcription factor NGA1-like	GO:0003677,GO:0005634	DNA binding|nucleus
ABI3L2	0	0	0	0	0	0	ARF31	B3 domain-containing protein At2g36080-like	GO:0003677,GO:0003700,GO:0005634,GO:0045892,GO:0080167	DNA binding|DNA-binding transcription factor activity|nucleus|negative regulation of transcription, DNA-templated|response to karrikin
ABI3L3	10.0269	10.7099	10.7322	17.2027	14.2557	14.9079	Os07g0679700	B3 domain-containing transcription repressor VAL2-like	GO:0003677,GO:0005634,GO:0008270	DNA binding|nucleus|zinc ion binding
ACBP2	161.064	154.148	158.311	125.692	201.291	139.809		acyl-CoA-binding protein	GO:0000062,GO:0008289	fatty-acyl-CoA binding|lipid binding
AFL2	0	0	0	0	0	0	FL	floricaula/leafy homolog	GO:0003677,GO:0005634,GO:0006355,GO:0007275	DNA binding|nucleus|regulation of transcription, DNA-templated|multicellular organism development
AHS	0.336244	0.161257	0.112888	0	0.0313178	0.0697865	PILS5	uncharacterized transporter YBR287W-like	GO:0005789,GO:0009733,GO:0009734,GO:0010252,GO:0010311,GO:0010329,GO:0016021,GO:0040009	endoplasmic reticulum membrane|response to auxin|auxin-activated signaling pathway|auxin homeostasis|lateral root formation|auxin efflux transmembrane transporter activity|integral component of membrane|regulation of growth rate
ALF2	5.59687	5.57573	7.1433	6.36749	5.77536	5.7083	AL5	PHD finger protein ALFIN-LIKE 4	GO:0003677,GO:0003714,GO:0005634,GO:0006325,GO:0006355,GO:0009414,GO:0009651,GO:0042393,GO:0046872	DNA binding|transcription corepressor activity|nucleus|chromatin organization|regulation of transcription, DNA-templated|response to water deprivation|response to salt stress|histone binding|metal ion binding
ALF3	67.2072	59.5223	62.3555	59.3812	54.9204	56.8425	AL4	PHD finger protein ALFIN-LIKE 4-like	GO:0005634,GO:0005829,GO:0006325,GO:0006355,GO:0035064,GO:0046872	nucleus|cytosol|chromatin organization|regulation of transcription, DNA-templated|methylated histone binding|metal ion binding
ALF5	2.52262	1.67738	1.78261	2.0429	3.08727	2.5447	AL1	PHD finger protein ALFIN-LIKE 2-like	GO:0005634,GO:0006325,GO:0006355,GO:0035064,GO:0043565,GO:0044212,GO:0046872	nucleus|chromatin organization|regulation of transcription, DNA-templated|methylated histone binding|sequence-specific DNA binding|transcription regulatory region DNA binding|metal ion binding
ALF6	6.29038	6.01275	6.40613	7.99026	6.23732	7.67533	WAV2	PHD finger protein ALFIN-LIKE 4	GO:0005783,GO:0005886,GO:0008236,GO:0016021,GO:0019866,GO:0048364	endoplasmic reticulum|plasma membrane|serine-type peptidase activity|integral component of membrane|organelle inner membrane|root development
AMY10	198.319	185.011	189.972	119.032	62.3858	112.75	AMY3	alpha-amylase 3, chloroplastic-like	GO:0004556,GO:0005509,GO:0005983,GO:0009507,GO:0009570,GO:0103025	alpha-amylase activity|calcium ion binding|starch catabolic process|chloroplast|chloroplast stroma|alpha-amylase activity (releasing maltohexaose)	path:mdm00500	Starch and sucrose metabolism
AP2D11	190.484	198.021	200.5	277.273	318.858	253.29	RAP2-2	ethylene-responsive transcription factor RAP2-12-like	GO:0001666,GO:0003677,GO:0003700,GO:0005634,GO:0009873,GO:0010468	response to hypoxia|DNA binding|DNA-binding transcription factor activity|nucleus|ethylene-activated signaling pathway|regulation of gene expression
AP2D12	0	0	0	0	0	0	RAP2-7	ethylene-responsive transcription factor RAP2-7-like	GO:0003677,GO:0003700,GO:0005634,GO:0009873	DNA binding|DNA-binding transcription factor activity|nucleus|ethylene-activated signaling pathway
AP2D14	3.66185	2.70138	1.85261	1.16817	1.27684	1.39917	ERF118	ethylene-responsive transcription factor CRF6-like	GO:0003677,GO:0003700,GO:0005634,GO:0009873	DNA binding|DNA-binding transcription factor activity|nucleus|ethylene-activated signaling pathway
AP2D43	3.47569	3.62826	2.56203	3.18504	2.58705	3.11292	N	TMV resistance protein N	GO:0005524,GO:0005737,GO:0007165,GO:0009626,GO:0043531	ATP binding|cytoplasm|signal transduction|plant-type hypersensitive response|ADP binding
AP2D49	0.179233	0.219659	0.356091	0.323003	0.691113	0.338088	DREB3	ethylene-responsive transcription factor TINY-like	GO:0003700,GO:0005634,GO:0009873,GO:0043565,GO:0045893	DNA-binding transcription factor activity|nucleus|ethylene-activated signaling pathway|sequence-specific DNA binding|positive regulation of transcription, DNA-templated
AP2D55	590.585	642.358	681.431	765.239	707.347	668.256	RAP2-2	ethylene-responsive transcription factor RAP2-12-like	GO:0001666,GO:0003677,GO:0003700,GO:0005634,GO:0009873,GO:0010468	response to hypoxia|DNA binding|DNA-binding transcription factor activity|nucleus|ethylene-activated signaling pathway|regulation of gene expression
ARF	61.2897	55.6352	64.5719	61.0466	82.1185	70.3666	ARF	ADP-ribosylation factor	GO:0005525,GO:0005737,GO:0005794,GO:0006471,GO:0006886,GO:0016192	GTP binding|cytoplasm|Golgi apparatus|protein ADP-ribosylation|intracellular protein transport|vesicle-mediated transport	path:mdm04144	Endocytosis
ARF1	8.64768	4.63802	3.99286	5.33336	5.1018	5.93991	ARF9	ADP-ribosylation factor 1	GO:0003700,GO:0005634,GO:0009734,GO:0043565	DNA-binding transcription factor activity|nucleus|auxin-activated signaling pathway|sequence-specific DNA binding	path:mdm04075	Plant hormone signal transduction
ARF2	7.10353	5.56445	6.31028	1.71589	2.33315	2.90467	ARF6	auxin response factor 6-like	GO:0003677,GO:0003700,GO:0005634,GO:0009733,GO:0009734,GO:0009908	DNA binding|DNA-binding transcription factor activity|nucleus|response to auxin|auxin-activated signaling pathway|flower development
ARF3	9.56991	7.75232	11.4278	9.86895	6.20674	9.36013	ARF3	auxin response factor 3	GO:0003677,GO:0003700,GO:0005634,GO:0009733,GO:0009734,GO:0009850,GO:0010050,GO:0010158,GO:0010582	DNA binding|DNA-binding transcription factor activity|nucleus|response to auxin|auxin-activated signaling pathway|auxin metabolic process|vegetative phase change|abaxial cell fate specification|floral meristem determinacy	path:mdm04075	Plant hormone signal transduction
AUX/IAA7.1	1.30847	0.782259	3.68577	12.6459	12.7451	14.0645	AUX28	auxin-induced protein AUX28	GO:0005634,GO:0006355,GO:0009734	nucleus|regulation of transcription, DNA-templated|auxin-activated signaling pathway	path:mdm04075	Plant hormone signal transduction
BGAL101	26.3159	103.647	38.7723	7.85685	8.53069	1.70309		beta-galactosidase	GO:0004565,GO:0005975,GO:0048046	beta-galactosidase activity|carbohydrate metabolic process|apoplast
BHLH10	13.2864	13.6035	12.0936	11.358	11.2415	11.7123	BHLH3	transcription factor bHLH3-like	GO:0003677,GO:0003700,GO:0005634,GO:0006355,GO:0010629,GO:0046983	DNA binding|DNA-binding transcription factor activity|nucleus|regulation of transcription, DNA-templated|negative regulation of gene expression|protein dimerization activity
BHLH15	2.12505	5.33011	3.4373	2.56068	3.80117	2.99656	BHLH062	transcription factor bHLH47	GO:0003677,GO:0005634,GO:0006355,GO:0046983	DNA binding|nucleus|regulation of transcription, DNA-templated|protein dimerization activity
BHLH18	0.0557147	0.0537813	0.188472	0.114507	0.10547	0.117481	BHLH106	transcription factor bHLH106-like	GO:0003677,GO:0003700,GO:0005634,GO:0006355,GO:0009941,GO:0042538,GO:0046983	DNA binding|DNA-binding transcription factor activity|nucleus|regulation of transcription, DNA-templated|chloroplast envelope|hyperosmotic salinity response|protein dimerization activity
BHLH21	12.6136	13.6682	12.1684	13.9545	12.3119	13.1182	BIM2	transcription factor BIM2-like	GO:0003700,GO:0005634,GO:0006351,GO:0043565,GO:0046983	DNA-binding transcription factor activity|nucleus|transcription, DNA-templated|sequence-specific DNA binding|protein dimerization activity
BHLH9	0.0340912	0.199147	0.0386609	0.0712398	0	0	BHLH96	transcription factor bHLH96-like	GO:0003677,GO:0003700,GO:0005634,GO:0046983	DNA binding|DNA-binding transcription factor activity|nucleus|protein dimerization activity
BZIP1	4.9136	5.94498	5.42981	4.48194	3.66507	5.12911	NRG2	uncharacterized LOC103447875	GO:0005634,GO:0010167,GO:0015706,GO:0071249,GO:0071705,GO:1901698	nucleus|response to nitrate|nitrate transport|cellular response to nitrate|nitrogen compound transport|response to nitrogen compound
BZIP12	52.8009	90.1685	81.8985	18.7563	16.8694	12.6865	RPT2	root phototropism protein 2-like	GO:0005634,GO:0005737,GO:0007165,GO:0009638,GO:0016567	nucleus|cytoplasm|signal transduction|phototropism|protein ubiquitination
BZIP15	12.6524	12.9744	12.5257	13.9364	16.606	15.0112	DPBF3	ABSCISIC ACID-INSENSITIVE 5-like protein 2	GO:0003700,GO:0005634,GO:0009737,GO:0009738,GO:0043565	DNA-binding transcription factor activity|nucleus|response to abscisic acid|abscisic acid-activated signaling pathway|sequence-specific DNA binding	path:mdm04075	Plant hormone signal transduction
BZIP18	0.468494	0.273409	0.433132	0.242939	0.110256	0.123532	ATHB-8	homeobox-leucine zipper protein ATHB-8-like	GO:0003677,GO:0003700,GO:0005634,GO:0008284,GO:0008289,GO:0009733,GO:0010014,GO:0010067,GO:0010072,GO:0010089,GO:0030154,GO:0045597	DNA binding|DNA-binding transcription factor activity|nucleus|positive regulation of cell proliferation|lipid binding|response to auxin|meristem initiation|procambium histogenesis|primary shoot apical meristem specification|xylem development|cell differentiation|positive regulation of cell differentiation
BZIP22	4.97245	5.18568	6.41892	3.17965	3.01307	3.99785	At1g30440	BTB/POZ domain-containing protein At1g30440-like	GO:0005886,GO:0016567	plasma membrane|protein ubiquitination
BZIP3	28.1088	37.0053	25.5425	39.9163	42.4698	48.5839	BZIP53	ocs element-binding factor 1	GO:0003700,GO:0005634,GO:0006971,GO:0009267,GO:0043565,GO:0044212,GO:0045735,GO:0045893,GO:0046982,GO:2000693	DNA-binding transcription factor activity|nucleus|hypotonic response|cellular response to starvation|sequence-specific DNA binding|transcription regulatory region DNA binding|nutrient reservoir activity|positive regulation of transcription, DNA-templated|protein heterodimerization activity|positive regulation of seed maturation
BZIP5	755.545	826.757	747.45	913.121	911.621	880.833	BZIP44	ocs element-binding factor 1	GO:0003700,GO:0005634,GO:0009845,GO:0043565,GO:0044212,GO:0045893,GO:0046982	DNA-binding transcription factor activity|nucleus|seed germination|sequence-specific DNA binding|transcription regulatory region DNA binding|positive regulation of transcription, DNA-templated|protein heterodimerization activity
CAMTA1	142.562	306.324	241.009	313.996	409.142	363.857	XXT2	calmodulin binding transcription activator 1	GO:0000139,GO:0000271,GO:0005768,GO:0005794,GO:0005802,GO:0009969,GO:0010411,GO:0016021,GO:0033843,GO:0035252,GO:0042803	Golgi membrane|polysaccharide biosynthetic process|endosome|Golgi apparatus|trans-Golgi network|xyloglucan biosynthetic process|xyloglucan metabolic process|integral component of membrane|xyloglucan 6-xylosyltransferase activity|UDP-xylosyltransferase activity|protein homodimerization activity
CAMTA3	0	0	0.0290192	0	0	0	GT7	putative glycosyltransferase 7	GO:0000139,GO:0005768,GO:0005794,GO:0005802,GO:0008378,GO:0010192,GO:0010214,GO:0010392,GO:0016021,GO:0051070	Golgi membrane|endosome|Golgi apparatus|trans-Golgi network|galactosyltransferase activity|mucilage biosynthetic process|seed coat development|galactoglucomannan metabolic process|integral component of membrane|galactomannan biosynthetic process
CDPK	23.7963	26.0101	23.04	21.6416	18.6847	23.8849	CPK1	calcium-dependent protein kinase 1	GO:0004674,GO:0004683,GO:0005509,GO:0005524,GO:0005634,GO:0005737,GO:0005777,GO:0005778,GO:0006468,GO:0009738,GO:0009931,GO:0010857,GO:0018105,GO:0035556,GO:0046777	protein serine/threonine kinase activity|calmodulin-dependent protein kinase activity|calcium ion binding|ATP binding|nucleus|cytoplasm|peroxisome|peroxisomal membrane|protein phosphorylation|abscisic acid-activated signaling pathway|calcium-dependent protein serine/threonine kinase activity|calcium-dependent protein kinase activity|peptidyl-serine phosphorylation|intracellular signal transductio…	path:mdm04626	Plant-pathogen interaction
CKS1	49.8371	51.6989	51.3579	58.7233	80.3954	49.8673	CKS1	cyclin-dependent kinases regulatory subunit 1	GO:0000278,GO:0000307,GO:0005737,GO:0007346,GO:0019005,GO:0019901,GO:0042023,GO:0042393,GO:0043130,GO:0045737,GO:0051301,GO:0051726,GO:0061575	mitotic cell cycle|cyclin-dependent protein kinase holoenzyme complex|cytoplasm|regulation of mitotic cell cycle|SCF ubiquitin ligase complex|protein kinase binding|DNA endoreduplication|histone binding|ubiquitin binding|positive regulation of cyclin-dependent protein serine/threonine kinase activity|cell division|regulation of cell cycle|cyclin-dependent protein serine/threonine kinase activator…
COL14	22.356	19.2059	19.9036	16.7072	14.1908	17.4998	COL15	zinc finger protein CONSTANS-LIKE 15-like	GO:0003700,GO:0005634,GO:0006355,GO:0008270	DNA-binding transcription factor activity|nucleus|regulation of transcription, DNA-templated|zinc ion binding
COL9	29.1698	17.5638	8.39026	11.8437	10.7754	22.735	COL9	zinc finger protein CONSTANS-LIKE 9-like	GO:0003700,GO:0005634,GO:0006355,GO:0007623,GO:0008270,GO:0048579	DNA-binding transcription factor activity|nucleus|regulation of transcription, DNA-templated|circadian rhythm|zinc ion binding|negative regulation of long-day photoperiodism, flowering
CPS	0	0	0	0	0	0		ent-copalyl diphosphate synthase, chloroplastic	GO:0000287,GO:0009507,GO:0009686,GO:0009905,GO:0010333	magnesium ion binding|chloroplast|gibberellin biosynthetic process|ent-copalyl diphosphate synthase activity|terpene synthase activity	path:mdm00904	Diterpenoid biosynthesis
CTR1	11.6266	12.0585	11.8506	10.2726	10.0406	9.63936	CTR1	serine/threonine-protein kinase CTR1	GO:0001666,GO:0004674,GO:0004712,GO:0005524,GO:0005789,GO:0009686,GO:0009723,GO:0009744,GO:0009750,GO:0009873,GO:0010105,GO:0010182,GO:0046777,GO:0048510,GO:0071281,GO:2000035,GO:2000069	response to hypoxia|protein serine/threonine kinase activity|protein serine/threonine/tyrosine kinase activity|ATP binding|endoplasmic reticulum membrane|gibberellin biosynthetic process|response to ethylene|response to sucrose|response to fructose|ethylene-activated signaling pathway|negative regulation of ethylene-activated signaling pathway|sugar mediated signaling pathway|protein autophosphor…	path:mdm04016,path:mdm04075	MAPK signaling pathway - plant|Plant hormone signal transduction
CWI	0	0	0	0	0.0451737	0	CWINV1	beta-fructofuranosidase, insoluble isoenzyme CWINV1-like	GO:0004564,GO:0005618,GO:0005886,GO:0005975,GO:0009611,GO:0048046,GO:0050832,GO:0080167	beta-fructofuranosidase activity|cell wall|plasma membrane|carbohydrate metabolic process|response to wounding|apoplast|defense response to fungus|response to karrikin	path:mdm00052,path:mdm00500	Galactose metabolism|Starch and sucrose metabolism
CYB5	238.924	187.352	189.359	183.04	206.588	160.976	CYTB5-E	cytochrome b5-like	GO:0005773,GO:0005774,GO:0005783,GO:0005789,GO:0005886,GO:0009535,GO:0016021,GO:0020037,GO:0046872,GO:0055114	vacuole|vacuolar membrane|endoplasmic reticulum|endoplasmic reticulum membrane|plasma membrane|chloroplast thylakoid membrane|integral component of membrane|heme binding|metal ion binding|oxidation-reduction process
CYCD3	1.47418	1.04202	2.49752	1.03612	0.642994	0.870094	CYCD3-3	cyclin-D3-1-like	GO:0000079,GO:0000278,GO:0000307,GO:0005634,GO:0005737,GO:0006468,GO:0007088,GO:0008284,GO:0010444,GO:0016538,GO:0019901,GO:0045787,GO:0048316,GO:0051301	regulation of cyclin-dependent protein serine/threonine kinase activity|mitotic cell cycle|cyclin-dependent protein kinase holoenzyme complex|nucleus|cytoplasm|protein phosphorylation|regulation of mitotic nuclear division|positive regulation of cell proliferation|guard mother cell differentiation|cyclin-dependent protein serine/threonine kinase regulator activity|protein kinase binding|positive …	path:mdm04075	Plant hormone signal transduction
CYP707A	0.45812	0.12296	0.257144	1.10617	1.22115	0.482853	CYP707A2	abscisic acid 8'-hydroxylase 4	GO:0004497,GO:0005506,GO:0009639,GO:0009687,GO:0010114,GO:0010295,GO:0016021,GO:0016125,GO:0020037,GO:0046345,GO:0048838,GO:0055114	monooxygenase activity|iron ion binding|response to red or far red light|abscisic acid metabolic process|response to red light|(+)-abscisic acid 8'-hydroxylase activity|integral component of membrane|sterol metabolic process|heme binding|abscisic acid catabolic process|release of seed from dormancy|oxidation-reduction process	path:mdm00906	Carotenoid biosynthesis
DHAR	115.523	109.959	113.445	116.396	148.884	113.302	DHAR2	glutathione S-transferase DHAR2-like	GO:0004364,GO:0005829,GO:0005886,GO:0010731,GO:0043295,GO:0045174,GO:0080151	glutathione transferase activity|cytosol|plasma membrane|protein glutathionylation|glutathione binding|glutathione dehydrogenase (ascorbate) activity|positive regulation of salicylic acid mediated signaling pathway	path:mdm00053,path:mdm00480	Ascorbate and aldarate metabolism|Glutathione metabolism
DOF7	1.64176	1.51448	2.07577	0.554826	0.468206	0.523901	DOF5.8	dof zinc finger protein DOF3.1	GO:0000976,GO:0003700,GO:0005634,GO:0006355,GO:0046872	transcription regulatory region sequence-specific DNA binding|DNA-binding transcription factor activity|nucleus|regulation of transcription, DNA-templated|metal ion binding
EIN2	14.8829	17.9563	17.0182	11.2511	10.3553	11.2962	EIN2	ethylene-insensitive protein 2	GO:0001736,GO:0002237,GO:0003729,GO:0005384,GO:0005634,GO:0005789,GO:0006970,GO:0009408,GO:0009651,GO:0009734,GO:0009736,GO:0009789,GO:0009871,GO:0009873,GO:0009926,GO:0010087,GO:0010119,GO:0010150,GO:0010182,GO:0015086,GO:0016021,GO:0031348,GO:0042742,GO:0048765,GO:0050832,GO:0051301,GO:0052544,GO:0071281	establishment of planar polarity|response to molecule of bacterial origin|mRNA binding|manganese ion transmembrane transporter activity|nucleus|endoplasmic reticulum membrane|response to osmotic stress|response to heat|response to salt stress|auxin-activated signaling pathway|cytokinin-activated signaling pathway|positive regulation of abscisic acid-activated signaling pathway|jasmonic acid and e…	path:mdm04016,path:mdm04075	MAPK signaling pathway - plant|Plant hormone signal transduction
ETR5	3.31724	3.42491	3.65559	3.06816	3.87561	3.42296	EIN4	protein EIN4	GO:0000155,GO:0004674,GO:0005524,GO:0005783,GO:0005789,GO:0010105,GO:0016021,GO:0038199,GO:0046872,GO:0051740	phosphorelay sensor kinase activity|protein serine/threonine kinase activity|ATP binding|endoplasmic reticulum|endoplasmic reticulum membrane|negative regulation of ethylene-activated signaling pathway|integral component of membrane|ethylene receptor activity|metal ion binding|ethylene binding	path:mdm04016,path:mdm04075	MAPK signaling pathway - plant|Plant hormone signal transduction
FK	25.0248	25.8895	28.2717	37.3192	29.6967	35.0938	At1g66430	probable fructokinase-4	GO:0005524,GO:0005829,GO:0006000,GO:0006633,GO:0008865,GO:0009507,GO:0009570,GO:0016051,GO:0019200,GO:0019252	ATP binding|cytosol|fructose metabolic process|fatty acid biosynthetic process|fructokinase activity|chloroplast|chloroplast stroma|carbohydrate biosynthetic process|carbohydrate kinase activity|starch biosynthetic process	path:mdm00051,path:mdm00500,path:mdm00520	Fructose and mannose metabolism|Starch and sucrose metabolism|Amino sugar and nucleotide sugar metabolism
FLS	22.0456	18.7829	15.8231	9.25744	4.93874	4.33722	FLS	flavonol synthase/flavanone 3-hydroxylase	GO:0005737,GO:0009813,GO:0031418,GO:0045486,GO:0046872	cytoplasm|flavonoid biosynthetic process|L-ascorbic acid binding|naringenin 3-dioxygenase activity|metal ion binding	path:mdm00941	Flavonoid biosynthesis
FPPS	16.2824	19.2789	20.908	21.9385	22.7757	26.3402	FPS1	farnesyl pyrophosphate synthase 2	GO:0004161,GO:0004337,GO:0005737,GO:0006695,GO:0033384,GO:0045337,GO:0046872	dimethylallyltranstransferase activity|geranyltranstransferase activity|cytoplasm|cholesterol biosynthetic process|geranyl diphosphate biosynthetic process|farnesyl diphosphate biosynthetic process|metal ion binding	path:mdm00900	Terpenoid backbone biosynthesis
GABA-T2	49.342	44.1229	46.7342	54.5376	51.7072	48.6269	GABA-TP3	gamma aminobutyrate transaminase 3, chloroplastic	GO:0004015,GO:0009102,GO:0009507,GO:0030170,GO:0034387,GO:0102351	adenosylmethionine-8-amino-7-oxononanoate transaminase activity|biotin biosynthetic process|chloroplast|pyridoxal phosphate binding|4-aminobutyrate:pyruvate transaminase activity|gamma-aminobutyrate transaminase (glyoxylate dependent) activity	path:mdm00250,path:mdm00650	Alanine, aspartate and glutamate metabolism|Butanoate metabolism
GAD1	724.741	590.431	631.493	648.843	433.021	688.096		glutamate decarboxylase	GO:0004351,GO:0005516,GO:0005829,GO:0006538,GO:0030170	glutamate decarboxylase activity|calmodulin binding|cytosol|glutamate catabolic process|pyridoxal phosphate binding	path:mdm00250,path:mdm00410,path:mdm00430,path:mdm00650	Alanine, aspartate and glutamate metabolism|beta-Alanine metabolism|Taurine and hypotaurine metabolism|Butanoate metabolism
GAD2	2.17575	1.21273	4.67423	5.00235	4.56595	4.21113	GAD1	glutamate decarboxylase 2 (pancreatic islets and brain, 65kDa)	GO:0004351,GO:0005516,GO:0005829,GO:0006538,GO:0030170,GO:0046686	glutamate decarboxylase activity|calmodulin binding|cytosol|glutamate catabolic process|pyridoxal phosphate binding|response to cadmium ion	path:mdm00250,path:mdm00410,path:mdm00430,path:mdm00650	Alanine, aspartate and glutamate metabolism|beta-Alanine metabolism|Taurine and hypotaurine metabolism|Butanoate metabolism
GAD3	0	0	0.0277396	0	0	0	GAD4	glutamate decarboxylase 4	GO:0004351,GO:0005516,GO:0005634,GO:0005829,GO:0006538,GO:0030170	glutamate decarboxylase activity|calmodulin binding|nucleus|cytosol|glutamate catabolic process|pyridoxal phosphate binding	path:mdm00250,path:mdm00410,path:mdm00430,path:mdm00650	Alanine, aspartate and glutamate metabolism|beta-Alanine metabolism|Taurine and hypotaurine metabolism|Butanoate metabolism
GATA2	0	0.0357524	0	0	0.0348995	0	GATA21	GATA binding protein 2	GO:0003700,GO:0005634,GO:0006355,GO:0007623,GO:0008270,GO:0009416,GO:0009658,GO:0009733,GO:0009735,GO:0009736,GO:0009739,GO:0009740,GO:0009910,GO:0009938,GO:0010029,GO:0010151,GO:0010187,GO:0010255,GO:0010380,GO:0010468,GO:0043565,GO:0043610,GO:0044212,GO:0051171,GO:0080050,GO:0090693,GO:1902326,GO:2000028	DNA-binding transcription factor activity|nucleus|regulation of transcription, DNA-templated|circadian rhythm|zinc ion binding|response to light stimulus|chloroplast organization|response to auxin|response to cytokinin|cytokinin-activated signaling pathway|response to gibberellin|gibberellic acid mediated signaling pathway|negative regulation of flower development|negative regulation of gibberell…
GATA5	0.271495	0.524131	0.190788	0.0350649	0	0	GATA21	GATA binding protein 5	GO:0003700,GO:0005634,GO:0006355,GO:0007623,GO:0008270,GO:0009416,GO:0009658,GO:0009733,GO:0009735,GO:0009736,GO:0009739,GO:0009740,GO:0009910,GO:0009938,GO:0010029,GO:0010151,GO:0010187,GO:0010255,GO:0010380,GO:0010468,GO:0043565,GO:0043610,GO:0044212,GO:0051171,GO:0080050,GO:0090693,GO:1902326,GO:2000028	DNA-binding transcription factor activity|nucleus|regulation of transcription, DNA-templated|circadian rhythm|zinc ion binding|response to light stimulus|chloroplast organization|response to auxin|response to cytokinin|cytokinin-activated signaling pathway|response to gibberellin|gibberellic acid mediated signaling pathway|negative regulation of flower development|negative regulation of gibberell…
GATA7	5.41278	4.77878	4.16222	9.51656	7.99147	11.4112	GATA5	GATA transcription factor 5-like	GO:0003700,GO:0005634,GO:0008270,GO:0043565,GO:0045893	DNA-binding transcription factor activity|nucleus|zinc ion binding|sequence-specific DNA binding|positive regulation of transcription, DNA-templated
GATA8	11.344	8.15244	8.1605	7.9864	5.8447	8.52644	GATA26	GATA transcription factor 26	GO:0003700,GO:0005634,GO:0008270,GO:0043565	DNA-binding transcription factor activity|nucleus|zinc ion binding|sequence-specific DNA binding
GK	6.53072	6.49597	5.0601	4.05468	6.25846	4.96762	At2g16790	glycerol kinase	GO:0005524,GO:0016787,GO:0046177,GO:0046316	ATP binding|hydrolase activity|D-gluconate catabolic process|gluconokinase activity	path:mdm00030	Pentose phosphate pathway
GLB1	0.51879	0.126314	0	0.267857	0.492506	0	GLB1	galactosidase, beta 1	GO:0019825,GO:0020037,GO:0046872	oxygen binding|heme binding|metal ion binding
GPAT	10.3619	6.437	7.05776	3.39421	3.52656	4.65307		glycerol-3-phosphate acyltransferase, chloroplastic	GO:0004366,GO:0009570,GO:0016024,GO:0102420	glycerol-3-phosphate O-acyltransferase activity|chloroplast stroma|CDP-diacylglycerol biosynthetic process|sn-1-glycerol-3-phosphate C16:0-DCA-CoA acyl transferase activity	path:mdm00561,path:mdm00564	Glycerolipid metabolism|Glycerophospholipid metabolism
GRF1	3.52353	3.42506	4.73178	3.38076	2.7535	2.3906		uncharacterized LOC103454749
GRF5	8.50067	8.98457	8.55319	9.56091	8.4498	7.36297	GIF3	GRF1-interacting factor 3	GO:0003713,GO:0005634,GO:0008283,GO:0045893,GO:0045944,GO:0048366	transcription coactivator activity|nucleus|cell proliferation|positive regulation of transcription, DNA-templated|positive regulation of transcription by RNA polymerase II|leaf development
HD1	3.40174	5.32529	4.60913	11.1459	14.9633	13.6753	HAT22	homeobox-leucine zipper protein HAT22-like	GO:0003700,GO:0005634,GO:0009414,GO:0009735,GO:0009737,GO:0009738,GO:0043565	DNA-binding transcription factor activity|nucleus|response to water deprivation|response to cytokinin|response to abscisic acid|abscisic acid-activated signaling pathway|sequence-specific DNA binding
HD11	25.1589	18.3176	21.8128	16.1067	12.0142	12.3749		homeobox protein knotted-1-like 3	GO:0003677,GO:0005634,GO:0006355	DNA binding|nucleus|regulation of transcription, DNA-templated
HD13	12.0251	13.2114	10.9535	19.5798	20.0038	21.4426	HD1	homeobox protein HD1-like	GO:0003677,GO:0005634,GO:0006355	DNA binding|nucleus|regulation of transcription, DNA-templated
HD14	147.374	116.388	111.48	270.531	175.448	230.31	ATHB-13	homeobox-leucine zipper protein ATHB-13-like	GO:0003700,GO:0005634,GO:0009744,GO:0009965,GO:0043565,GO:0048826,GO:0080022	DNA-binding transcription factor activity|nucleus|response to sucrose|leaf morphogenesis|sequence-specific DNA binding|cotyledon morphogenesis|primary root development
HD16	73.331	61.5476	42.5957	23.3378	16.8565	24.5556	HOX22	homeobox-leucine zipper protein ATHB-12-like	GO:0003700,GO:0005634,GO:0043565	DNA-binding transcription factor activity|nucleus|sequence-specific DNA binding
HD18	0.958669	0.446472	0.282192	0.565069	0.395435	0.707444	ATHB-16	homeobox-leucine zipper protein ATHB-6-like	GO:0003700,GO:0005634,GO:0009637,GO:0030308,GO:0043565,GO:0045893,GO:0048510,GO:0048573	DNA-binding transcription factor activity|nucleus|response to blue light|negative regulation of cell growth|sequence-specific DNA binding|positive regulation of transcription, DNA-templated|regulation of timing of transition from vegetative to reproductive phase|photoperiodism, flowering
HD19	11.7079	8.78316	8.52008	1.36337	1.33046	1.63033	ATHB-13	homeobox-leucine zipper protein ATHB-13-like	GO:0003700,GO:0005634,GO:0009744,GO:0009965,GO:0043565,GO:0048826,GO:0080022	DNA-binding transcription factor activity|nucleus|response to sucrose|leaf morphogenesis|sequence-specific DNA binding|cotyledon morphogenesis|primary root development
HD2	2.22124	2.17065	2.71238	2.81779	2.57374	2.56439	PRH	pathogenesis-related homeodomain protein	GO:0003700,GO:0005634,GO:0006952,GO:0009733,GO:0035064,GO:0043565,GO:0045893,GO:0046872,GO:0061087	DNA-binding transcription factor activity|nucleus|defense response|response to auxin|methylated histone binding|sequence-specific DNA binding|positive regulation of transcription, DNA-templated|metal ion binding|positive regulation of histone H3-K27 methylation
HD23	77.1381	46.3038	44.1624	26.6224	27.293	40.8542		homeobox protein knotted-1-like 3	GO:0003677,GO:0005634,GO:0006355	DNA binding|nucleus|regulation of transcription, DNA-templated
HD3	0.0206847	0.0201787	0.0235197	0.010861	0	0	HDG1	homeobox-leucine zipper protein ANTHOCYANINLESS 2	GO:0003700,GO:0005634,GO:0008289,GO:0043565,GO:0048497	DNA-binding transcription factor activity|nucleus|lipid binding|sequence-specific DNA binding|maintenance of floral organ identity
HD6	20.9572	13.0193	12.7699	21.0469	18.6389	23.2703	GL2	homeobox-leucine zipper protein GLABRA 2-like	GO:0005634,GO:0006355,GO:0008289,GO:0043565	nucleus|regulation of transcription, DNA-templated|lipid binding|sequence-specific DNA binding
HD8	1.20643	1.21993	1.27122	0.778246	0.72946	0.767441	N	TMV resistance protein N	GO:0005524,GO:0005737,GO:0007165,GO:0009626,GO:0043531	ATP binding|cytoplasm|signal transduction|plant-type hypersensitive response|ADP binding
HIPM	0.787922	0.569006	0.885472	0.940728	0.861232	1.37412		uncharacterized HIPM
HMT	2.3408	4.74342	2.94165	3.89897	6.25031	4.2659	HMT1	homocysteine S-methyltransferase 1	GO:0005737,GO:0008270,GO:0008898,GO:0009086,GO:0032259,GO:0047150	cytoplasm|zinc ion binding|S-adenosylmethionine-homocysteine S-methyltransferase activity|methionine biosynthetic process|methylation|betaine-homocysteine S-methyltransferase activity	path:mdm00270	Cysteine and methionine metabolism
HRGP	34.3617	31.4885	32.3019	25.6418	39.8792	25.5942	RPL14A	60S ribosomal protein L14-1	GO:0003723,GO:0003735,GO:0005773,GO:0005783,GO:0006412,GO:0009506,GO:0022625,GO:0042273	RNA binding|structural constituent of ribosome|vacuole|endoplasmic reticulum|translation|plasmodesma|cytosolic large ribosomal subunit|ribosomal large subunit biogenesis	path:mdm03010	Ribosome
HSF1	5.42203	6.21359	6.49183	6.52432	6.50315	5.10503	HSFA8	heat shock transcription factor 1	GO:0000978,GO:0003700,GO:0005634,GO:0005737,GO:0034605,GO:0043565,GO:0061408	RNA polymerase II proximal promoter sequence-specific DNA binding|DNA-binding transcription factor activity|nucleus|cytoplasm|cellular response to heat|sequence-specific DNA binding|positive regulation of transcription from RNA polymerase II promoter in response to heat stress
HSF3	13.9407	7.84778	8.00199	7.78586	7.82615	6.81169	HSFA4B	heat stress transcription factor A-4b-like	GO:0000978,GO:0003700,GO:0005634,GO:0005737,GO:0034605,GO:0043565,GO:0061408	RNA polymerase II proximal promoter sequence-specific DNA binding|DNA-binding transcription factor activity|nucleus|cytoplasm|cellular response to heat|sequence-specific DNA binding|positive regulation of transcription from RNA polymerase II promoter in response to heat stress
HSF4	0	0	0	0.106591	0	0.0365952	HSFB2A	heat shock transcription factor 4	GO:0000978,GO:0003700,GO:0005634,GO:0010200,GO:0034605,GO:0043565,GO:0061408	RNA polymerase II proximal promoter sequence-specific DNA binding|DNA-binding transcription factor activity|nucleus|response to chitin|cellular response to heat|sequence-specific DNA binding|positive regulation of transcription from RNA polymerase II promoter in response to heat stress
HSF8	0.134502	0.0519397	0.240896	0.137271	0.101262	0.0853373	HSFB4	heat stress transcription factor B-4	GO:0000978,GO:0003700,GO:0005634,GO:0005737,GO:0008356,GO:0034605,GO:0043565,GO:0061408	RNA polymerase II proximal promoter sequence-specific DNA binding|DNA-binding transcription factor activity|nucleus|cytoplasm|asymmetric cell division|cellular response to heat|sequence-specific DNA binding|positive regulation of transcription from RNA polymerase II promoter in response to heat stress
HY5	9.71577	9.56194	14.7257	8.94472	7.98599	5.62635	HY5	transcription factor HY5	GO:0003700,GO:0005634,GO:0009585,GO:0010017,GO:0010099,GO:0010114,GO:0010218,GO:0043565	DNA-binding transcription factor activity|nucleus|red, far-red light phototransduction|red or far-red light signaling pathway|regulation of photomorphogenesis|response to red light|response to far red light|sequence-specific DNA binding	path:mdm04712	Circadian rhythm - plant
IAA11	2.21601	1.07756	1.90165	0.955917	0.671948	1.42352	IAA26	auxin-responsive protein IAA26-like	GO:0003700,GO:0005634,GO:0009733,GO:0009734	DNA-binding transcription factor activity|nucleus|response to auxin|auxin-activated signaling pathway	path:mdm04075	Plant hormone signal transduction
IAA12	30.5766	21.7143	24.2136	48.0145	24.8013	44.9642	IAA27	auxin-responsive protein IAA27	GO:0003700,GO:0005634,GO:0009733,GO:0009734	DNA-binding transcription factor activity|nucleus|response to auxin|auxin-activated signaling pathway	path:mdm04075	Plant hormone signal transduction
IAA2	41.8895	33.0332	36.1483	73.8352	59.8141	62.6189	IAA8	auxin-responsive protein IAA8-like	GO:0005634,GO:0006355,GO:0009734,GO:1901332	nucleus|regulation of transcription, DNA-templated|auxin-activated signaling pathway|negative regulation of lateral root development	path:mdm04075	Plant hormone signal transduction
IAA4	44.4206	68.202	53.1287	82.143	43.651	45.582	IAA3	auxin-responsive protein IAA3-like	GO:0003700,GO:0005634,GO:0009733,GO:0009734,GO:0044212	DNA-binding transcription factor activity|nucleus|response to auxin|auxin-activated signaling pathway|transcription regulatory region DNA binding	path:mdm04075	Plant hormone signal transduction
IAA5	0	0	0	0	0	0	IAA14	auxin-responsive protein IAA14-like	GO:0003700,GO:0005634,GO:0009733,GO:0009734,GO:0010102,GO:0045892	DNA-binding transcription factor activity|nucleus|response to auxin|auxin-activated signaling pathway|lateral root morphogenesis|negative regulation of transcription, DNA-templated	path:mdm04075	Plant hormone signal transduction
IAA8	1.21346	1.79183	1.0143	0.562678	2.58023	1.66007	AUX22D	auxin-induced protein 22D-like	GO:0005634,GO:0006355,GO:0009734	nucleus|regulation of transcription, DNA-templated|auxin-activated signaling pathway	path:mdm04075	Plant hormone signal transduction
IAA9	0.429825	0.229567	0.588822	0.59372	1.06696	2.04071	IAA29	auxin-responsive protein IAA29-like	GO:0003700,GO:0005634,GO:0009733,GO:0009734,GO:0010114,GO:0010218	DNA-binding transcription factor activity|nucleus|response to auxin|auxin-activated signaling pathway|response to red light|response to far red light	path:mdm04075	Plant hormone signal transduction
IPT	6.8338	5.652	6.55768	6.79186	6.97688	5.94868	IPT2	tRNA dimethylallyltransferase 2	GO:0005524,GO:0005739,GO:0005829,GO:0006400,GO:0009691,GO:0009824,GO:0052381	ATP binding|mitochondrion|cytosol|tRNA modification|cytokinin biosynthetic process|AMP dimethylallyltransferase activity|tRNA dimethylallyltransferase activity	path:mdm00908	Zeatin biosynthesis
KNAP1	0	0	0	0	0.252013	0.025794		homeobox protein knotted-1-like 1	GO:0005634,GO:0006355,GO:0043565	nucleus|regulation of transcription, DNA-templated|sequence-specific DNA binding
KS	5.43851	5.16231	4.75012	3.4056	4.25158	3.59306		ent-kaur-16-ene synthase, chloroplastic	GO:0000287,GO:0009507,GO:0009686,GO:0009899	magnesium ion binding|chloroplast|gibberellin biosynthetic process|ent-kaurene synthase activity	path:mdm00904	Diterpenoid biosynthesis
LAR1	140.735	239.777	226.999	1.16971	0.803981	0.488508	LAR	leucoanthocyanidin reductase-like	GO:0010023,GO:0033788	proanthocyanidin biosynthetic process|leucoanthocyanidin reductase activity	path:mdm00941	Flavonoid biosynthesis
LAR2	0	0.0637536	0.0738752	0	0.0310504	0	LAR	leucoanthocyanidin reductase-like	GO:0010023,GO:0033788	proanthocyanidin biosynthetic process|leucoanthocyanidin reductase activity	path:mdm00941	Flavonoid biosynthesis
LAX2	0.789459	1.90059	1.27135	1.20054	1.34217	0.81688	LAX1	auxin transporter-like protein 1	GO:0005886,GO:0006865,GO:0009734,GO:0015293,GO:0016021	plasma membrane|amino acid transport|auxin-activated signaling pathway|symporter activity|integral component of membrane	path:mdm04075	Plant hormone signal transduction
LB	33.8924	38.5048	34.672	28.7589	27.6874	27.0484	At1g04970	putative BPI/LBP family protein At1g04970	GO:0001530,GO:0005615,GO:0005773,GO:0005774,GO:0010468,GO:1903409	lipopolysaccharide binding|extracellular space|vacuole|vacuolar membrane|regulation of gene expression|reactive oxygen species biosynthetic process
LIS	2.13773	2.51137	3.19973	0	0	0.0289735		(3S,6E)-nerolidol synthase 1-like	GO:0000287,GO:0005739,GO:0009507,GO:0010333,GO:0016114	magnesium ion binding|mitochondrion|chloroplast|terpene synthase activity|terpenoid biosynthetic process	path:mdm00909	Sesquiterpenoid and triterpenoid biosynthesis
LOC103399997	3.75215	3.25151	5.03441	5.61593	5.88732	4.26509		uncharacterized LOC103399997
LOC103399998	75.3306	75.0117	65.2528	134.806	206.234	141.304		uncharacterized LOC103399998
LOC103399999	53.6235	43.1575	46.1436	61.3629	46.2244	40.965	GAPN	NADP-dependent glyceraldehyde-3-phosphate dehydrogenase-like	GO:0005737,GO:0008886	cytoplasm|glyceraldehyde-3-phosphate dehydrogenase (NADP+) (non-phosphorylating) activity	path:mdm00010,path:mdm00030	Glycolysis / Gluconeogenesis|Pentose phosphate pathway
LOC103400001	79.9621	74.5958	89.9445	75.9041	89.8216	55.4986	RPS12	40S ribosomal protein S12-like	GO:0003735,GO:0005840,GO:0006412	structural constituent of ribosome|ribosome|translation	path:mdm03010	Ribosome
LOC103400002	38.8011	39.0846	45.1512	38.114	49.1807	34.8174	RPS12	40S ribosomal protein S12-like	GO:0003735,GO:0005840,GO:0006412	structural constituent of ribosome|ribosome|translation	path:mdm03010	Ribosome
LOC103400003	17.6672	17.9228	18.6469	19.4906	19.5183	20.4129	rtf2	replication termination factor 2-like	GO:0005634,GO:0071171,GO:1902979	nucleus|site-specific DNA replication termination at RTS1 barrier|mitotic DNA replication termination
LOC103400005	2.69282	3.80772	3.66995	3.40568	3.86191	4.35052	BHLH121	transcription factor bHLH121-like	GO:0003700,GO:0005634,GO:0043565,GO:0046983	DNA-binding transcription factor activity|nucleus|sequence-specific DNA binding|protein dimerization activity
LOC103400013	121.349	115.952	114.922	115.952	114.194	114.558	YKT61	VAMP-like protein YKT61	GO:0005886,GO:0015031,GO:0016021,GO:0016192	plasma membrane|protein transport|integral component of membrane|vesicle-mediated transport	path:mdm04130	SNARE interactions in vesicular transport
LOC103400014	12.0334	9.703	10.1166	5.56695	3.75753	6.0416	CBP60E	calmodulin-binding protein 60 E-like	GO:0003700,GO:0005516,GO:0005634,GO:0043565,GO:0080142	DNA-binding transcription factor activity|calmodulin binding|nucleus|sequence-specific DNA binding|regulation of salicylic acid biosynthetic process
LOC103400015	1.25283	2.80864	1.14347	2.77055	9.90229	5.41536	ARR18	two-component response regulator ARR12-like	GO:0000160,GO:0003677,GO:0003700,GO:0005634,GO:0009736	phosphorelay signal transduction system|DNA binding|DNA-binding transcription factor activity|nucleus|cytokinin-activated signaling pathway	path:mdm04075	Plant hormone signal transduction
LOC103400016	33.2221	32.1421	32.9732	39.6852	33.2169	35.9001	CPK28	calcium-dependent protein kinase 28-like	GO:0004674,GO:0004683,GO:0004722,GO:0005509,GO:0005524,GO:0005634,GO:0005737,GO:0005886,GO:0006468,GO:0006952,GO:0007275,GO:0009738,GO:0009931,GO:0018105,GO:0035556,GO:0040008,GO:1900425,GO:2000032	protein serine/threonine kinase activity|calmodulin-dependent protein kinase activity|protein serine/threonine phosphatase activity|calcium ion binding|ATP binding|nucleus|cytoplasm|plasma membrane|protein phosphorylation|defense response|multicellular organism development|abscisic acid-activated signaling pathway|calcium-dependent protein serine/threonine kinase activity|peptidyl-serine phosphor…	path:mdm04626	Plant-pathogen interaction
LOC103400017	1.22451	0.54482	1.18486	0.407272	0.414975	0.439179	bem46	alpha/beta hydrolase domain-containing protein 17B-like	GO:0005783,GO:0016021,GO:0016788	endoplasmic reticulum|integral component of membrane|hydrolase activity, acting on ester bonds
LOC103400018	10.3222	6.43068	7.98468	3.42524	2.98663	2.81171		uncharacterized LOC103400018
LOC103400019	0.0410759	2.43202e-11	0.0233552	0.0216101	1.74372e-10	0	ChiC	class V chitinase	GO:0000272,GO:0004568,GO:0005576,GO:0005618,GO:0006032,GO:0008061,GO:0008843,GO:0009651,GO:0009737,GO:0009753,GO:0035885	polysaccharide catabolic process|chitinase activity|extracellular region|cell wall|chitin catabolic process|chitin binding|endochitinase activity|response to salt stress|response to abscisic acid|response to jasmonic acid|exochitinase activity	path:mdm00520	Amino sugar and nucleotide sugar metabolism
LOC103400020	0	0	0	0.0651073	0.0589176	0	SD16	putative receptor-like protein kinase At4g00960
LOC103400021	0.614897	0.432698	0.46192	0.116552	0.0879383	0.0785154	NCU09302	WD repeat-containing protein 76-like	GO:0003677,GO:0006974,GO:2000001	DNA binding|cellular response to DNA damage stimulus|regulation of DNA damage checkpoint
LOC103400023	35.6212	34.2275	26.374	45.4399	44.0436	52.4025	STP7	sugar transport protein 7	GO:0005351,GO:0005355,GO:0005886,GO:0005887,GO:0008645,GO:0012505,GO:0042882,GO:0042900,GO:0090406	carbohydrate:proton symporter activity|glucose transmembrane transporter activity|plasma membrane|integral component of plasma membrane|hexose transmembrane transport|endomembrane system|L-arabinose transmembrane transport|arabinose transmembrane transporter activity|pollen tube
LOC103400025	0.525012	0.64212	1.11739	6.54317	9.8186	6.26527		naringenin,2-oxoglutarate 3-dioxygenase	GO:0009813,GO:0031418,GO:0045486,GO:0046872	flavonoid biosynthetic process|L-ascorbic acid binding|naringenin 3-dioxygenase activity|metal ion binding	path:mdm00941	Flavonoid biosynthesis
LOC103400026	6.76368	12.4538	7.71397	17.9711	23.7302	12.3067		uncharacterized LOC103400026
LOC103400027	2.71136	2.14846	2.58909	1.83908	1.64272	1.75613	STIPL1	uncharacterized LOC103400027	GO:0000390,GO:0000398,GO:0003677,GO:0031981,GO:0042752,GO:0071008,GO:1990446	spliceosomal complex disassembly|mRNA splicing, via spliceosome|DNA binding|nuclear lumen|regulation of circadian rhythm|U2-type post-mRNA release spliceosomal complex|U1 snRNP binding
LOC103400028	46.8742	62.2336	56.9022	54.8778	60.116	63.7357	TMN11	transmembrane 9 superfamily member 11	GO:0000139,GO:0005768,GO:0005794,GO:0005802,GO:0010008,GO:0016020,GO:0016021,GO:0072657	Golgi membrane|endosome|Golgi apparatus|trans-Golgi network|endosome membrane|membrane|integral component of membrane|protein localization to membrane
LOC103400029	1.23656	0.342129	0.79641	0	0.279186	0.250421	OR	protein ORANGE-GREEN, chloroplastic-like	GO:0005634,GO:0009661,GO:0009826,GO:0016021,GO:0031969,GO:1904143	nucleus|chromoplast organization|unidimensional cell growth|integral component of membrane|chloroplast membrane|positive regulation of carotenoid biosynthetic process
LOC103400031	10.7342	10.5539	8.64856	9.41439	6.65655	10.5086	CTR1	uncharacterized LOC103400031	GO:0001666,GO:0004674,GO:0004712,GO:0005524,GO:0005789,GO:0009686,GO:0009723,GO:0009744,GO:0009750,GO:0009873,GO:0010105,GO:0010182,GO:0046777,GO:0048510,GO:0071281,GO:2000035,GO:2000069	response to hypoxia|protein serine/threonine kinase activity|protein serine/threonine/tyrosine kinase activity|ATP binding|endoplasmic reticulum membrane|gibberellin biosynthetic process|response to ethylene|response to sucrose|response to fructose|ethylene-activated signaling pathway|negative regulation of ethylene-activated signaling pathway|sugar mediated signaling pathway|protein autophosphor…
LOC103400032	20.1694	22.7513	23.0911	21.4824	18.1565	20.4816	RMR4	uncharacterized LOC103400032	GO:0000306,GO:0006511,GO:0015031,GO:0016021,GO:0031902,GO:0032586,GO:0046872,GO:0061630	extrinsic component of vacuolar membrane|ubiquitin-dependent protein catabolic process|protein transport|integral component of membrane|late endosome membrane|protein storage vacuole membrane|metal ion binding|ubiquitin protein ligase activity
LOC103400033	223.665	171.283	164.619	284.813	288.656	257.106	At3g61260	remorin-like	GO:0005773,GO:0005886,GO:0009506	vacuole|plasma membrane|plasmodesma
LOC103400034	0.791292	1.20338	0.767524	0.941538	1.70003	4.52993		uncharacterized LOC103400034
LOC103400035	63.8485	51.0373	53.8341	38.2229	42.3521	46.976	RHY1A	probable E3 ubiquitin-protein ligase RHY1A	GO:0016567,GO:0016740,GO:0046872	protein ubiquitination|transferase activity|metal ion binding
LOC103400039	15.9072	14.643	15.196	14.0415	9.38123	13.54	CIP73	ubiquitin-like domain-containing protein CIP73	GO:0005634,GO:0009877	nucleus|nodulation
LOC103400041	17.9473	15.5558	15.5533	12.7724	14.5231	13.5904		homeobox protein knotted-1-like LET12	GO:0003677,GO:0005634,GO:0006355	DNA binding|nucleus|regulation of transcription, DNA-templated
LOC103400042	0.121278	0	0	0.19084	0.115358	0.129041		uncharacterized LOC103400042
LOC103400043	0	0	0	0	0.326588	0.0279279	At2g41040	uncharacterized methyltransferase At2g41040, chloroplastic-like	GO:0005739,GO:0008168,GO:0009507,GO:0010287,GO:0080167	mitochondrion|methyltransferase activity|chloroplast|plastoglobule|response to karrikin
LOC103400044	3.14873	3.93803	3.46619	2.13676	1.28174	1.67595	At2g41040	uncharacterized methyltransferase At2g41040, chloroplastic-like	GO:0005739,GO:0008168,GO:0009507,GO:0010287,GO:0080167	mitochondrion|methyltransferase activity|chloroplast|plastoglobule|response to karrikin
LOC103400045	0.204281	0.197868	0.29524	0.0907954	0	0		uncharacterized LOC103400045
LOC103400047	0	0	0	0	0	0		uncharacterized LOC103400047
LOC103400048	0	0	0	0	0	0		uncharacterized LOC103400048
LOC103400049	12.3653	17.1547	10.7946	23.6877	14.9406	21.1265		uncharacterized LOC103400049
LOC103400050	0	0	0	0	0	0		uncharacterized LOC103400050
LOC103400052	15.2557	13.2256	14.8867	11.0457	12.3259	10.1533	TTM3	triphosphate tunnel metalloenzyme 3-like	GO:0005524,GO:0005634,GO:0016887,GO:0048364,GO:0050355	ATP binding|nucleus|ATPase activity|root development|triphosphatase activity
LOC103400053	0.0685227	0.0220948	0.0774497	0.0950567	0.0431003	0	At5g34940	heparanase-like protein 3	GO:0004566,GO:0005576,GO:0005765,GO:0009505	beta-glucuronidase activity|extracellular region|lysosomal membrane|plant-type cell wall	path:mdm00531	Glycosaminoglycan degradation
LOC103400054	4.11618	4.66852	5.02307	1.77147	1.92672	1.37554	ANTR6	probable anion transporter 6, chloroplastic	GO:0005315,GO:0009536,GO:0016021,GO:0031969	inorganic phosphate transmembrane transporter activity|plastid|integral component of membrane|chloroplast membrane
LOC103400055	7.07329	8.26345	6.76967	8.35599	3.77208	7.54553	TRA1	transformation/transcription domain-associated protein-like	GO:0000124,GO:0003712,GO:0005634,GO:0006281,GO:0006355,GO:0016573,GO:0035267,GO:0045944,GO:0046695	SAGA complex|transcription coregulator activity|nucleus|DNA repair|regulation of transcription, DNA-templated|histone acetylation|NuA4 histone acetyltransferase complex|positive regulation of transcription by RNA polymerase II|SLIK (SAGA-like) complex
LOC103400056	5.14066	5.63282	4.88089	4.33333	4.6648	5.46691	UBP22	ubiquitin C-terminal hydrolase 22-like	GO:0006511,GO:0008270,GO:0016579,GO:0036459	ubiquitin-dependent protein catabolic process|zinc ion binding|protein deubiquitination|thiol-dependent ubiquitinyl hydrolase activity
LOC103400057	12.3292	8.86346	9.25038	3.19185	2.56629	2.34207	ARPC3	actin-related protein 2/3 complex subunit 3	GO:0003779,GO:0005737,GO:0005885,GO:0007015,GO:0034314,GO:0042995	actin binding|cytoplasm|Arp2/3 protein complex|actin filament organization|Arp2/3 complex-mediated actin nucleation|cell projection	path:mdm04144	Endocytosis
LOC103400059	2.90679	2.10146	3.13838	2.26014	1.91367	1.72183	ndhB	uncharacterized LOC103400059	GO:0008137,GO:0009535,GO:0016021,GO:0019684,GO:0042773,GO:0048038	NADH dehydrogenase (ubiquinone) activity|chloroplast thylakoid membrane|integral component of membrane|photosynthesis, light reaction|ATP synthesis coupled electron transport|quinone binding
LOC103400060	1.19092	0.895844	0.852054	0.769243	0.29455	0.657182		uncharacterized LOC103400060
LOC103400061	36.7795	35.1263	37.3311	29.6215	37.8679	31.6941	PAP26	bifunctional purple acid phosphatase 26-like	GO:0003993,GO:0004601,GO:0005773,GO:0005829,GO:0009505,GO:0042744,GO:0046872,GO:0055062	acid phosphatase activity|peroxidase activity|vacuole|cytosol|plant-type cell wall|hydrogen peroxide catabolic process|metal ion binding|phosphate ion homeostasis
LOC103400062	4.17013	4.25714	3.28992	2.7602	2.39458	2.54737	TOC90	translocase of chloroplast 90, chloroplastic	GO:0005525,GO:0009707,GO:0016021,GO:0016787,GO:0045036,GO:0046872	GTP binding|chloroplast outer membrane|integral component of membrane|hydrolase activity|protein targeting to chloroplast|metal ion binding
LOC103400063	8.38791	8.48647	8.17493	8.54506	7.33544	8.00587	CRCK3	calmodulin-binding receptor-like cytoplasmic kinase 3
LOC103400064	0.499185	0.20971	0.0753857	0.27794	0.0475132	0.21216	CLC-G	putative chloride channel-like protein CLC-g	GO:0005247,GO:0034707,GO:0034765,GO:1902476	voltage-gated chloride channel activity|chloride channel complex|regulation of ion transmembrane transport|chloride transmembrane transport
LOC103400066	57.4377	62.4351	50.6222	69.2505	45.0623	61.1268	SPS1	probable sucrose-phosphate synthase 1	GO:0005986,GO:0016157,GO:0046524	sucrose biosynthetic process|sucrose synthase activity|sucrose-phosphate synthase activity	path:mdm00500	Starch and sucrose metabolism
LOC103400068	17.6803	17.3043	20.0631	14.7646	16.3883	13.3949	APRF1	protein ANTHESIS POMOTING FACTOR 1	GO:0003682,GO:0005634,GO:0009908,GO:0016571,GO:0048188,GO:0048510,GO:0048586,GO:0080008,GO:0080182	chromatin binding|nucleus|flower development|histone methylation|Set1C/COMPASS complex|regulation of timing of transition from vegetative to reproductive phase|regulation of long-day photoperiodism, flowering|Cul4-RING E3 ubiquitin ligase complex|histone H3-K4 trimethylation	path:mdm03015	mRNA surveillance pathway
LOC103400071	5.75615	5.52656	5.52444	4.33322	3.94365	4.03846	mak10	N-alpha-acetyltransferase 35, NatC auxiliary subunit-like	GO:0004596,GO:0005634,GO:0005829,GO:0006474,GO:0017196,GO:0031417	peptide alpha-N-acetyltransferase activity|nucleus|cytosol|N-terminal protein amino acid acetylation|N-terminal peptidyl-methionine acetylation|NatC complex
LOC103400072	26.8691	25.6579	28.312	40.335	40.1531	38.6395		uncharacterized LOC103400072
LOC103400073	1.09548	0.898111	0.901607	0.201846	0.180843	0.201584	At2g42730	uncharacterized LOC103400073
LOC103400075	13.0828	10.7932	10.2672	7.67464	6.17146	8.54744		CCR4-NOT transcription complex subunit 10-like			path:mdm03018	RNA degradation
LOC103400077	182.947	96.3772	166.406	313.543	302.134	215.267	TPRP-F1	36.4 kDa proline-rich protein-like
LOC103400078	0	0	0	0	0	0		ribonuclease S-7-like	GO:0003723,GO:0005615,GO:0033897	RNA binding|extracellular space|ribonuclease T2 activity
LOC103400079	0	0	0	0	0	0	At3g51220	WEB family protein At3g51220-like	GO:0005829,GO:0009903,GO:0009904	cytosol|chloroplast avoidance movement|chloroplast accumulation movement
LOC103400080	4.68599	4.3421	4.3938	4.92224	3.69129	3.7184	mdm28	mitochondrial proton/calcium exchanger protein-like	GO:0005739,GO:0005743,GO:0016021,GO:0032543,GO:0043022	mitochondrion|mitochondrial inner membrane|integral component of membrane|mitochondrial translation|ribosome binding
LOC103400083	0	0	0	0	0	0	RGA1	putative disease resistance protein RGA1	GO:0005524,GO:0006952,GO:0043531	ATP binding|defense response|ADP binding
LOC103400086	0	0	0	0	0	0		uncharacterized LOC103400086
LOC103400089	0	0	0	0	0	0	WUS	protein WUSCHEL-like	GO:0003677,GO:0005634,GO:0009908,GO:0030154	DNA binding|nucleus|flower development|cell differentiation
LOC103400093	0	0	0	0	0	0		cytochrome P450 CYP72A219-like	GO:0004497,GO:0005506,GO:0016021,GO:0016705,GO:0020037	monooxygenase activity|iron ion binding|integral component of membrane|oxidoreductase activity, acting on paired donors, with incorporation or reduction of molecular oxygen|heme binding
LOC103400094	0	0	0	0	0	0	WER	transcription factor WER-like	GO:0003677,GO:0003700,GO:0005634,GO:0030154,GO:0043565,GO:0044212,GO:0045165,GO:0045893,GO:0048765	DNA binding|DNA-binding transcription factor activity|nucleus|cell differentiation|sequence-specific DNA binding|transcription regulatory region DNA binding|cell fate commitment|positive regulation of transcription, DNA-templated|root hair cell differentiation
LOC103400095	1.59694	1.94767	1.79215	2.13295	1.79452	2.2064		pentatricopeptide repeat-containing protein At5g65560-like
LOC103400096	0	0	0	0	0	0		uncharacterized LOC103400096
LOC103400097	0	0	0	0	0	0	SIS8	serine/threonine-protein kinase STY46-like	GO:0004674,GO:0004712,GO:0005524,GO:0005634,GO:0009651,GO:0010182	protein serine/threonine kinase activity|protein serine/threonine/tyrosine kinase activity|ATP binding|nucleus|response to salt stress|sugar mediated signaling pathway
LOC103400099	0	0	0	0	0	0	HSP17.9	17.9 kDa class II heat shock protein-like	GO:0005737	cytoplasm	path:mdm04141	Protein processing in endoplasmic reticulum
LOC103400104	0	0	0	0	0	0	CYP711A1	cytochrome P450 711A1-like	GO:0004497,GO:0005506,GO:0009926,GO:0009934,GO:0009963,GO:0010223,GO:0016021,GO:0016117,GO:0016705,GO:0020037	monooxygenase activity|iron ion binding|auxin polar transport|regulation of meristem structural organization|positive regulation of flavonoid biosynthetic process|secondary shoot formation|integral component of membrane|carotenoid biosynthetic process|oxidoreductase activity, acting on paired donors, with incorporation or reduction of molecular oxygen|heme binding
LOC103400106	0	0	0	0	0	0		uncharacterized LOC103400106
LOC103400107	0	0	0	0	0	0	ADS3	palmitoyl-monogalactosyldiacylglycerol delta-7 desaturase, chloroplastic-like	GO:0005789,GO:0006636,GO:0009579,GO:0009979,GO:0010205,GO:0016021,GO:0016717,GO:0031408,GO:0031969	endoplasmic reticulum membrane|unsaturated fatty acid biosynthetic process|thylakoid|16:0 monogalactosyldiacylglycerol desaturase activity|photoinhibition|integral component of membrane|oxidoreductase activity, acting on paired donors, with oxidation of a pair of donors resulting in the reduction of molecular oxygen to two molecules of water|oxylipin biosynthetic process|chloroplast membrane
LOC103400110	0	0	0.0326663	0.0301613	0.0136152	0	GLR2.8	glutamate receptor 2.8-like	GO:0004970,GO:0005262,GO:0005622,GO:0005886,GO:0006816,GO:0008066,GO:0016021,GO:0019722,GO:0071230	ionotropic glutamate receptor activity|calcium channel activity|intracellular|plasma membrane|calcium ion transport|glutamate receptor activity|integral component of membrane|calcium-mediated signaling|cellular response to amino acid stimulus
LOC103400112	0	0	0	0	0	0	RLP6	receptor-like protein 31	GO:0005886,GO:0016020,GO:0016021	plasma membrane|membrane|integral component of membrane
LOC103400113	5.77932	8.2042	7.29838	8.06562	9.44735	9.94072	KEA6	K(+) efflux antiporter 6-like	GO:0006813,GO:0015299,GO:0016020,GO:0016021	potassium ion transport|solute:proton antiporter activity|membrane|integral component of membrane
LOC103400117	0	0	0	0	0	0.0310586		uncharacterized LOC103400117
LOC103400118	21.0426	26.206	25.8832	34.6242	43.7942	39.4837	RXW8	CSC1-like protein RXW8	GO:0005227,GO:0005886,GO:0016021	calcium activated cation channel activity|plasma membrane|integral component of membrane
LOC103400119	0	0	0	0	0	0	ACS8	1-aminocyclopropane-1-carboxylate synthase 8	GO:0009693,GO:0009835,GO:0016847,GO:0030170,GO:0042802	ethylene biosynthetic process|fruit ripening|1-aminocyclopropane-1-carboxylate synthase activity|pyridoxal phosphate binding|identical protein binding	path:mdm00270	Cysteine and methionine metabolism
LOC103400120	0	0	0	0	0	0	GRF6	growth-regulating factor 1-like	GO:0005524,GO:0005634,GO:0006351,GO:0006355,GO:0032502	ATP binding|nucleus|transcription, DNA-templated|regulation of transcription, DNA-templated|developmental process
LOC103400121	4.49626	3.9034	4.21256	4.8153	2.85589	4.6538	PRP40A	pre-mRNA-processing protein 40A-like	GO:0000398,GO:0003723,GO:0005685,GO:0005829,GO:0016592,GO:0071004	mRNA splicing, via spliceosome|RNA binding|U1 snRNP|cytosol|mediator complex|U2-type prespliceosome	path:mdm03040	Spliceosome
LOC103400122	8.58595	2.01869	2.84863	0.102577	0.0936713	0.315876		uncharacterized LOC103400122
LOC103400123	0.157764	0.491909	0.464275	0.231172	0.569243	0.368084	TAF14B	transcription initiation factor TFIID subunit 14b-like	GO:0005634,GO:0005737,GO:0006281,GO:0006355,GO:0009908,GO:0009909,GO:0030154,GO:0035267,GO:0043981,GO:0048510,GO:0090239,GO:2000028	nucleus|cytoplasm|DNA repair|regulation of transcription, DNA-templated|flower development|regulation of flower development|cell differentiation|NuA4 histone acetyltransferase complex|histone H4-K5 acetylation|regulation of timing of transition from vegetative to reproductive phase|regulation of histone H4 acetylation|regulation of photoperiodism, flowering
LOC103400126	89.8005	91.2516	93.3208	75.6924	92.2444	87.9133	Os02g0794700	leucine aminopeptidase 2, chloroplastic-like	GO:0004177,GO:0008235,GO:0009507,GO:0030145	aminopeptidase activity|metalloexopeptidase activity|chloroplast|manganese ion binding	path:mdm00480	Glutathione metabolism
LOC103400127	0	0	0	0	0	0	SCPL18	serine carboxypeptidase-like 13	GO:0004185,GO:0005576,GO:0019748	serine-type carboxypeptidase activity|extracellular region|secondary metabolic process
LOC103400128	0.231022	0.5283	0.569245	0.807636	0.517533	0.477109		trichohyalin-like
LOC103400130	1.47223	0.644455	0.744182	3.45502	5.46731	4.57594	FRO1	NADH dehydrogenase [ubiquinone] iron-sulfur protein 4, mitochondrial-like	GO:0005739,GO:0005747,GO:0006970,GO:0008137,GO:0009631,GO:0022900,GO:0050897	mitochondrion|mitochondrial respiratory chain complex I|response to osmotic stress|NADH dehydrogenase (ubiquinone) activity|cold acclimation|electron transport chain|cobalt ion binding	path:mdm00190	Oxidative phosphorylation
LOC103400131	0.0474026	0.0911372	0	0	0	0.0498442	PLIM2B	LIM domain-containing protein PLIM2b	GO:0005737,GO:0005856,GO:0046872,GO:0051015,GO:0051017	cytoplasm|cytoskeleton|metal ion binding|actin filament binding|actin filament bundle assembly
LOC103400133	3.00974	5.28918	3.97824	3.63604	4.11221	4.03498		A-kinase anchor protein 17B
LOC103400137	0.0507759	0	0.0383607	0	0.0321795	0.0359954	IDM1	increased DNA methylation 1-like	GO:0004402,GO:0005634,GO:0009506,GO:0010385,GO:0042393,GO:0043971,GO:0043972,GO:0044030,GO:0044154,GO:0046872,GO:0080188	histone acetyltransferase activity|nucleus|plasmodesma|double-stranded methylated DNA binding|histone binding|histone H3-K18 acetylation|histone H3-K23 acetylation|regulation of DNA methylation|histone H3-K14 acetylation|metal ion binding|RNA-directed DNA methylation
LOC103400142	38.3465	34.2938	37.2773	43.8001	36.8604	40.2513		uncharacterized LOC103400142
LOC103400146	0.122255	0.016943	0.0984804	0.0548202	0.0493257	0		uncharacterized LOC103400146
LOC103400147	0	0	0.0245802	0	0	0	APUM12	pumilio homolog 12-like	GO:0003723,GO:0005634,GO:0005737,GO:0006417	RNA binding|nucleus|cytoplasm|regulation of translation
LOC103400148	8.75636	8.05213	7.81227	8.35927	7.44765	9.06756	At1g65240	aspartic proteinase-like protein 2	GO:0004190,GO:0005886,GO:0006508,GO:0030163,GO:0031225,GO:0046658	aspartic-type endopeptidase activity|plasma membrane|proteolysis|protein catabolic process|anchored component of membrane|anchored component of plasma membrane
LOC103400153	0.232817	0.267731	0.496179	0	0	0	SPAC17H9.04c	uncharacterized LOC103400153	GO:0003723,GO:0005730,GO:0046872	RNA binding|nucleolus|metal ion binding
LOC103400157	0.561619	1.63898	0.922267	1.19771	1.17357	1.23619		uncharacterized LOC103400157
LOC103400158	1.92182	2.21171	2.51594	2.06739	1.7323	1.79365	NAC072	NAC domain containing protein 52-like	GO:0003677,GO:0003700,GO:0005634,GO:0045893	DNA binding|DNA-binding transcription factor activity|nucleus|positive regulation of transcription, DNA-templated
LOC103400161	16.2297	15.7391	15.4413	10.9982	9.57694	10.0511	ALKBH9B	RNA demethylase ALKBH9B-like	GO:0000932,GO:0003729,GO:0006402,GO:0009506,GO:0016032,GO:0032451,GO:0046872,GO:0051213,GO:0070988	P-body|mRNA binding|mRNA catabolic process|plasmodesma|viral process|demethylase activity|metal ion binding|dioxygenase activity|demethylation
LOC103400167	5.87834	2.5463	8.00958	0.201883	2.94203	0.616526	GASA1	snakin-2-like	GO:0005576,GO:0005618,GO:0009505,GO:0009737,GO:0009739,GO:0009740,GO:0009741,GO:0009826	extracellular region|cell wall|plant-type cell wall|response to abscisic acid|response to gibberellin|gibberellic acid mediated signaling pathway|response to brassinosteroid|unidimensional cell growth
LOC103400168	0.0701458	0.201558	0.157126	0.363774	0.130454	0.219189	AUG5	AUGMIN subunit 5-like	GO:0005876,GO:0009524,GO:0051011,GO:0051225,GO:0051301,GO:0070652	spindle microtubule|phragmoplast|microtubule minus-end binding|spindle assembly|cell division|HAUS complex
LOC103400169	0	0	0	0	0	0	PLP2	patatin-like protein 2	GO:0004620,GO:0005737,GO:0006629,GO:0009626,GO:0016020,GO:0016042,GO:0016298,GO:0031408,GO:0046686,GO:0047372,GO:0051607,GO:0071456	phospholipase activity|cytoplasm|lipid metabolic process|plant-type hypersensitive response|membrane|lipid catabolic process|lipase activity|oxylipin biosynthetic process|response to cadmium ion|acylglycerol lipase activity|defense response to virus|cellular response to hypoxia
LOC103400171	0.116914	0.31171	0.131517	0.0606289	0.0828734	0.0932227		uncharacterized LOC103400171
LOC103400174	0	0	0	0	0	0		uncharacterized LOC103400174
LOC103400175	0	0	0	0	0	0	GA20OX2	gibberellin 20 oxidase 2-like	GO:0046872,GO:0051213	metal ion binding|dioxygenase activity
LOC103400178	0	0	0	0.0334875	0	0.0168196	WAK2	wall-associated receptor kinase 2-like
LOC103400179	5.64394	6.23004	4.81885	6.29567	2.96395	6.02602	TRA1	transformation/transcription domain-associated protein-like	GO:0000124,GO:0003712,GO:0005634,GO:0006281,GO:0006355,GO:0016573,GO:0035267,GO:0045944,GO:0046695	SAGA complex|transcription coregulator activity|nucleus|DNA repair|regulation of transcription, DNA-templated|histone acetylation|NuA4 histone acetyltransferase complex|positive regulation of transcription by RNA polymerase II|SLIK (SAGA-like) complex
LOC103400182	8.78214	9.60751	9.82084	11.3803	11.8299	10.4752	At5g63260	zinc finger CCCH domain-containing protein 67-like	GO:0003677,GO:0005634,GO:0046872	DNA binding|nucleus|metal ion binding
LOC103400183	30.1195	26.0446	29.8194	17.6036	16.5348	15.8855	PFK3	ATP-dependent 6-phosphofructokinase 6-like	GO:0003872,GO:0005524,GO:0005829,GO:0006002,GO:0006096,GO:0010053,GO:0046872	6-phosphofructokinase activity|ATP binding|cytosol|fructose 6-phosphate metabolic process|glycolytic process|root epidermal cell differentiation|metal ion binding	path:mdm00010,path:mdm00030,path:mdm00051,path:mdm00052,path:mdm03018	Glycolysis / Gluconeogenesis|Pentose phosphate pathway|Fructose and mannose metabolism|Galactose metabolism|RNA degradation
LOC103400184	4.78197	5.2119	4.03029	4.08848	2.96404	4.45931	CALS10	callose synthase 10	GO:0000148,GO:0003843,GO:0005794,GO:0005886,GO:0006075,GO:0008360,GO:0009506,GO:0009555,GO:0009556,GO:0016021,GO:0048589,GO:0071555	1,3-beta-D-glucan synthase complex|1,3-beta-D-glucan synthase activity|Golgi apparatus|plasma membrane|(1->3)-beta-D-glucan biosynthetic process|regulation of cell shape|plasmodesma|pollen development|microsporogenesis|integral component of membrane|developmental growth|cell wall organization
LOC103400188	2.037	1.2831	1.57373	0.658872	0.619455	0.738196	ELP3	elongator complex protein 3-like	GO:0002926,GO:0004402,GO:0005634,GO:0005719,GO:0005737,GO:0005829,GO:0008283,GO:0009294,GO:0010928,GO:0033588,GO:0035265,GO:0046872,GO:0051536,GO:0090708,GO:2000025	tRNA wobble base 5-methoxycarbonylmethyl-2-thiouridinylation|histone acetyltransferase activity|nucleus|nuclear euchromatin|cytoplasm|cytosol|cell proliferation|DNA mediated transformation|regulation of auxin mediated signaling pathway|Elongator holoenzyme complex|organ growth|metal ion binding|iron-sulfur cluster binding|specification of plant organ axis polarity|regulation of leaf formation
LOC103400189	0	0	0	0	0	0	At3g51220	WEB family protein At3g51220-like	GO:0005829,GO:0009903,GO:0009904	cytosol|chloroplast avoidance movement|chloroplast accumulation movement
LOC103400190	1.02127	0.764471	1.09351	4.4795	3.88094	4.56418	At5g51370	F-box/LRR-repeat protein 4-like	GO:0006511,GO:0016567,GO:0019005,GO:0031146	ubiquitin-dependent protein catabolic process|protein ubiquitination|SCF ubiquitin ligase complex|SCF-dependent proteasomal ubiquitin-dependent protein catabolic process
LOC103400191	0	0.0829143	0	0.177111	0.0809606	0	CML19	putative calcium-binding protein CML19	GO:0005509,GO:0005634,GO:0019722	calcium ion binding|nucleus|calcium-mediated signaling	path:mdm04626	Plant-pathogen interaction
LOC103400196	0	0	0	0	0	0	PERK1	proline-rich receptor-like protein kinase PERK3
LOC103400197	0	0	0	0	0	0	VAMP726	putative vesicle-associated membrane protein 726	GO:0000149,GO:0005484,GO:0005768,GO:0005886,GO:0006887,GO:0006906,GO:0009507,GO:0015031,GO:0016021,GO:0031201,GO:0031901	SNARE binding|SNAP receptor activity|endosome|plasma membrane|exocytosis|vesicle fusion|chloroplast|protein transport|integral component of membrane|SNARE complex|early endosome membrane
LOC103400202	0	0	0	0	0.0142457	0.0160332		putative WEB family protein At1g65010, chloroplastic
LOC103400205	0.252864	0.676629	0.450643	0.469882	0.280901	0.210053	NRPD1	DNA-directed RNA polymerase IV subunit 1-like	GO:0000418,GO:0003677,GO:0003899,GO:0005634,GO:0005654,GO:0005666,GO:0006383,GO:0010495,GO:0030422,GO:0031047,GO:0046872	RNA polymerase IV complex|DNA binding|DNA-directed 5'-3' RNA polymerase activity|nucleus|nucleoplasm|RNA polymerase III complex|transcription by RNA polymerase III|long-distance posttranscriptional gene silencing|production of siRNA involved in RNA interference|gene silencing by RNA|metal ion binding
LOC103400207	0.74067	0.437748	0.63768	0.0878146	0.133448	0.269561	At2g40090	uncharacterized aarF domain-containing protein kinase 1-like	GO:0005215	transporter activity
LOC103400209	10.4092	8.54045	8.91859	4.57794	4.74848	3.73868	AIG2LC	AIG2-like protein D	GO:0016746	transferase activity, transferring acyl groups
LOC103400212	0	0	0	0	0	0		uncharacterized LOC103400212
LOC103400214	0	0.147949	0	0.154422	0	0		uncharacterized LOC103400214
LOC103400215	0.216268	0.0591144	0.344788	0.350366	0.459359	0.577937	APE2	DNA-(apurinic or apyrimidinic site) lyase 2-like	GO:0003906,GO:0004519,GO:0004528,GO:0005634,GO:0006284,GO:0008270,GO:0008311,GO:0140078	DNA-(apurinic or apyrimidinic site) endonuclease activity|endonuclease activity|phosphodiesterase I activity|nucleus|base-excision repair|zinc ion binding|double-stranded DNA 3'-5' exodeoxyribonuclease activity|class I DNA-(apurinic or apyrimidinic site) endonuclease activity
LOC103400217	2.5928	1.26219	0.811884	1.70126	2.15272	1.01947		uncharacterized LOC103400217
LOC103400218	0	0	0	0	0	0		uncharacterized LOC103400218
LOC103400220	4.42418	2.33806	5.63069	3.76148	4.00323	1.10379	N118	protein FAM32A-like	GO:0005634,GO:0005730	nucleus|nucleolus
LOC103400221	42.8132	35.0372	37.8316	13.8956	11.5793	13.6774		uncharacterized LOC103400221
LOC103400222	2.34447	2.48865	1.50839	0.626971	0.428315	0.478232	CRYD	cryptochrome DASH, chloroplastic/mitochondrial	GO:0003677,GO:0003913,GO:0005739,GO:0006281,GO:0009507,GO:0018298	DNA binding|DNA photolyase activity|mitochondrion|DNA repair|chloroplast|protein-chromophore linkage
LOC103400226	44.6356	70.9553	47.3921	29.8783	27.672	29.2318	LPAT2	1-acyl-sn-glycerol-3-phosphate acyltransferase 2-like	GO:0003841,GO:0005789,GO:0016021,GO:0016024	1-acylglycerol-3-phosphate O-acyltransferase activity|endoplasmic reticulum membrane|integral component of membrane|CDP-diacylglycerol biosynthetic process	path:mdm00561,path:mdm00564	Glycerolipid metabolism|Glycerophospholipid metabolism
LOC103400227	1.22427	1.2358	1.41918	0.821886	0.621722	0.901498	PMRT15	protein arginine N-methyltransferase 1.5-like	GO:0005634,GO:0005829,GO:0008276,GO:0008469,GO:0009909,GO:0010220,GO:0034969,GO:0043985	nucleus|cytosol|protein methyltransferase activity|histone-arginine N-methyltransferase activity|regulation of flower development|positive regulation of vernalization response|histone arginine methylation|histone H4-R3 methylation	path:mdm03013	RNA transport
LOC103400230	0.0716783	0	0.0198873	0	0.0838065	0.207397	LRX4	leucine-rich repeat extensin-like protein 4	GO:0005199,GO:0005576,GO:0005618,GO:0009505,GO:0009506,GO:0071555	structural constituent of cell wall|extracellular region|cell wall|plant-type cell wall|plasmodesma|cell wall organization
LOC103400231	0.0637133	0.0737414	0.0429093	0.033189	0.0298259	0.013312		uncharacterized LOC103400231
LOC103400235	0	0	0	0	0	0	MYB73	myb-like protein L	GO:0003700,GO:0005634,GO:0006355,GO:0009723,GO:0009737,GO:0009751,GO:0009753,GO:0010200,GO:0010929,GO:0019760,GO:0043565,GO:0044212,GO:0046686,GO:1901001	DNA-binding transcription factor activity|nucleus|regulation of transcription, DNA-templated|response to ethylene|response to abscisic acid|response to salicylic acid|response to jasmonic acid|response to chitin|positive regulation of auxin mediated signaling pathway|glucosinolate metabolic process|sequence-specific DNA binding|transcription regulatory region DNA binding|response to cadmium ion|n…
LOC103400236	0.311284	0.229696	0.0804101	0.0248182	0	0.0995687	CRK29	putative receptor-like protein kinase At4g00960
LOC103400239	0.436242	0.948846	0.665715	1.50169	3.18245	2.57192	ATJ11	chaperone protein dnaJ 11, chloroplastic-like	GO:0005634,GO:0009507,GO:0009536,GO:0009570	nucleus|chloroplast|plastid|chloroplast stroma
LOC103400242	4.39339	5.16175	6.79258	6.4232	3.90091	3.40598	PUB8	U-box domain-containing protein 14-like	GO:0004842,GO:0005634,GO:0005737,GO:0016567	ubiquitin-protein transferase activity|nucleus|cytoplasm|protein ubiquitination
LOC103400244	0	0	0	0	0	0	At3g47200	UPF0481 protein At3g47200-like	GO:0005886,GO:0016021	plasma membrane|integral component of membrane
LOC103400245	0	0	0	0	0	0	SD25	G-type lectin S-receptor-like serine/threonine-protein kinase SD2-5
LOC103400247	0	0	0	0	0	0		uncharacterized LOC103400247
LOC103400248	0	0	0	0	0	0	At3g15720	probable polygalacturonase At3g15720	GO:0004650,GO:0005576,GO:0005975,GO:0009505,GO:0031225,GO:0046658,GO:0071555	polygalacturonase activity|extracellular region|carbohydrate metabolic process|plant-type cell wall|anchored component of membrane|anchored component of plasma membrane|cell wall organization	path:mdm00040	Pentose and glucuronate interconversions
LOC103400251	0	0	0	0	0	0		uncharacterized LOC103400251
LOC103400252	0	0	0	0	0	0	LECRKS5	probable L-type lectin-domain containing receptor kinase S.5
LOC103400255	1.61744	0.699126	1.49634	0.503538	0.303102	0.636483	SNRNP25	uncharacterized LOC103400255	GO:0005681,GO:0006397,GO:0008380	spliceosomal complex|mRNA processing|RNA splicing
LOC103400258	0	0	0	0	0	0		uncharacterized LOC103400258
LOC103400260	0	0	0	0	0	0	At5g11130/At5g11120	probable glycosyltransferase At5g11130	GO:0000139,GO:0006486,GO:0016021,GO:0016757,GO:0071555	Golgi membrane|protein glycosylation|integral component of membrane|transferase activity, transferring glycosyl groups|cell wall organization
LOC103400261	0	0	0	0	0	0	ARB_01444	probable endo-1,3(4)-beta-glucanase ARB_01444	GO:0005576,GO:0005618,GO:0008152,GO:0052861,GO:0052862	extracellular region|cell wall|metabolic process|glucan endo-1,3-beta-glucanase activity, C-3 substituted reducing group|glucan endo-1,4-beta-glucanase activity, C-3 substituted reducing group
LOC103400263	3.09516	2.8468	2.5365	3.63138	4.12648	2.43276		pollen-specific leucine-rich repeat extensin-like protein 1
LOC103400265	0	0	0	0.0095369	0	0	FLOT4	uncharacterized LOC103400265	GO:0005886,GO:0005901,GO:0009877,GO:0016324	plasma membrane|caveola|nodulation|apical plasma membrane
LOC103400267	0	0	0	0	0	0		uncharacterized LOC103400267
LOC103400270	9.00351	7.43806	6.63293	5.32056	3.36641	5.41217	At1g21570	uncharacterized protein At1g21580	GO:0003677,GO:0003723,GO:0004518,GO:0046872	DNA binding|RNA binding|nuclease activity|metal ion binding
LOC103400271	0	0	0	0	0	0	NFYB7	nuclear transcription factor Y subunit B-7	GO:0003700,GO:0005634,GO:0043565,GO:0045893,GO:0046982	DNA-binding transcription factor activity|nucleus|sequence-specific DNA binding|positive regulation of transcription, DNA-templated|protein heterodimerization activity
LOC103400275	8.50159	10.5711	11.8153	7.86541	8.7404	8.47154	PERK12	uncharacterized LOC103400275
LOC103400276	34.3699	35.2118	36.668	67.949	59.9409	68.0632	FLCY	farnesylcysteine lyase	GO:0001735,GO:0005764,GO:0005773,GO:0005774,GO:0009738,GO:0030327,GO:0030328,GO:0045338,GO:0102149	prenylcysteine oxidase activity|lysosome|vacuole|vacuolar membrane|abscisic acid-activated signaling pathway|prenylated protein catabolic process|prenylcysteine catabolic process|farnesyl diphosphate metabolic process|farnesylcysteine lyase activity	path:mdm00900	Terpenoid backbone biosynthesis
LOC103400280	0	0	0	0	0	0		uncharacterized LOC103400280
LOC103400281	2.32059	1.93706	2.36505	1.46527	2.28911	1.3354		uncharacterized LOC103400281
LOC103400282	6.76469	5.35563	6.0431	1.90528	2.31749	2.9748	PXM16	insulin-degrading enzyme-like 1, peroxisomal	GO:0004222,GO:0005739,GO:0005777,GO:0046872,GO:0051603	metalloendopeptidase activity|mitochondrion|peroxisome|metal ion binding|proteolysis involved in cellular protein catabolic process
LOC103400283	0	0	0	0	0	0	DOG1	protein DOG1-like 3	GO:0005634,GO:0006351,GO:0009738,GO:0010162,GO:0010182,GO:0043565,GO:2000033	nucleus|transcription, DNA-templated|abscisic acid-activated signaling pathway|seed dormancy process|sugar mediated signaling pathway|sequence-specific DNA binding|regulation of seed dormancy process
LOC103400290	0	0	0	0	0	0	CHX15	cation/H(+) antiporter 15-like	GO:0006813,GO:0006885,GO:0012505,GO:0015299,GO:0016021	potassium ion transport|regulation of pH|endomembrane system|solute:proton antiporter activity|integral component of membrane
LOC103400293	0.588086	0.297202	0.172754	0.638305	0.351753	0.925573	MYH	adenine DNA glycosylase	GO:0000701,GO:0005634,GO:0006281,GO:0006284,GO:0006298,GO:0032357,GO:0034039,GO:0035485,GO:0046872,GO:0051539	purine-specific mismatch base pair DNA N-glycosylase activity|nucleus|DNA repair|base-excision repair|mismatch repair|oxidized purine DNA binding|8-oxo-7,8-dihydroguanine DNA N-glycosylase activity|adenine/guanine mispair binding|metal ion binding|4 iron, 4 sulfur cluster binding	path:mdm03410	Base excision repair
LOC103400294	21.3684	20.3903	30.5728	23.9678	23.1868	20.5863	SKIP35	ankyrin repeat protein SKIP35-like
LOC103400295	0	0	0.0250154	0	0	0	APS2	inactive glucose-1-phosphate adenylyltransferase small subunit 2, chloroplastic-like	GO:0005524,GO:0005978,GO:0008878,GO:0009507	ATP binding|glycogen biosynthetic process|glucose-1-phosphate adenylyltransferase activity|chloroplast	path:mdm00500,path:mdm00520	Starch and sucrose metabolism|Amino sugar and nucleotide sugar metabolism
LOC103400296	4.33309	5.29324	4.50304	4.53101	4.01788	5.13099	PARG1	poly(ADP-ribose) glycohydrolase 1-like	GO:0004649,GO:0005634,GO:0005737,GO:0005975,GO:0006282,GO:0006970,GO:0006974,GO:0006979,GO:0009225,GO:0009414,GO:0048511,GO:0050832,GO:0090332,GO:1990966	poly(ADP-ribose) glycohydrolase activity|nucleus|cytoplasm|carbohydrate metabolic process|regulation of DNA repair|response to osmotic stress|cellular response to DNA damage stimulus|response to oxidative stress|nucleotide-sugar metabolic process|response to water deprivation|rhythmic process|defense response to fungus|stomatal closure|ATP generation from poly-ADP-D-ribose
LOC103400298	18.9556	19.9318	17.6026	14.0028	15.4167	14.5479		uncharacterized LOC103400298
LOC103400299	0	0	0	0	0	0		uncharacterized LOC103400299
LOC103400300	36.5591	34.9135	34.4033	44.2451	36.829	40.4309	At5g02620	ankyrin repeat-containing protein At5g02620-like	GO:0005783,GO:0005886,GO:0016021	endoplasmic reticulum|plasma membrane|integral component of membrane
LOC103400301	0	0	0	0	0	0	NAC043	NAC transcription factor 32-like	GO:0003677,GO:0003700,GO:0005634,GO:0009834,GO:0010047,GO:0045893	DNA binding|DNA-binding transcription factor activity|nucleus|plant-type secondary cell wall biogenesis|fruit dehiscence|positive regulation of transcription, DNA-templated
LOC103400302	3.9574	2.84247	4.82922	7.17966	8.90085	6.55041		triosephosphate isomerase, cytosolic-like	GO:0004807,GO:0005829,GO:0006094,GO:0006096,GO:0019563,GO:0046166	triose-phosphate isomerase activity|cytosol|gluconeogenesis|glycolytic process|glycerol catabolic process|glyceraldehyde-3-phosphate biosynthetic process	path:mdm00010,path:mdm00051,path:mdm00562,path:mdm00710	Glycolysis / Gluconeogenesis|Fructose and mannose metabolism|Inositol phosphate metabolism|Carbon fixation in photosynthetic organisms
LOC103400303	19.1475	19.493	21.8944	12.5488	21.075	14.6581		triosephosphate isomerase, cytosolic-like	GO:0004807,GO:0005829,GO:0006094,GO:0006096,GO:0019563,GO:0046166	triose-phosphate isomerase activity|cytosol|gluconeogenesis|glycolytic process|glycerol catabolic process|glyceraldehyde-3-phosphate biosynthetic process	path:mdm00010,path:mdm00051,path:mdm00562,path:mdm00710	Glycolysis / Gluconeogenesis|Fructose and mannose metabolism|Inositol phosphate metabolism|Carbon fixation in photosynthetic organisms
LOC103400304	0.0785306	0	0	0	0	0	MCM5	DNA replication licensing factor MCM5-like	GO:0000347,GO:0003688,GO:0004386,GO:0005524,GO:0005737,GO:0006270,GO:0007049,GO:0042555	THO complex|DNA replication origin binding|helicase activity|ATP binding|cytoplasm|DNA replication initiation|cell cycle|MCM complex	path:mdm03030	DNA replication
LOC103400306	0	0	0	0	0	0	FKBP20-1	peptidyl-prolyl cis-trans isomerase FKBP20-1-like	GO:0000413,GO:0003755,GO:0005528,GO:0005737,GO:0061077	protein peptidyl-prolyl isomerization|peptidyl-prolyl cis-trans isomerase activity|FK506 binding|cytoplasm|chaperone-mediated protein folding
LOC103400315	0.609027	0.297969	0.172587	0	0	0		uncharacterized LOC103400315
LOC103400318	0.764656	0.778136	0.551577	0.385959	0.239981	0.744821	APO2	APO protein 2, chloroplastic-like	GO:0003723,GO:0009507	RNA binding|chloroplast
LOC103400320	0	0	0	0	0	0	SRF8	protein STRUBBELIG-RECEPTOR FAMILY 8-like
LOC103400323	0.969429	0.350738	0.135927	0	0	0	RPPL1	putative disease resistance RPP13-like protein 1
LOC103400324	12.151	12.0669	14.139	9.97834	13.5887	17.6839	RTNLB21	reticulon-like protein B21	GO:0005789,GO:0016021	endoplasmic reticulum membrane|integral component of membrane
LOC103400327	0.0863341	0.0165542	0	0.0536821	0	0	CES101	cysteine-rich receptor-like protein kinase 19
LOC103400335	0.335471	0.471286	0.438081	0.385529	0.513442	0.312675		uncharacterized LOC103400335
LOC103400340	0	0	0	0	0	0		basic-leucine zipper transcription factor A-like
LOC103400341	5.13081	5.41395	4.84323	53.4094	38.8618	50.0314		short stature homeobox protein 2-like
LOC103400345	5.57725	5.01468	6.01038	3.16839	3.14507	3.24458	At3g55350	protein ALP1-like	GO:0004518,GO:0005634,GO:0046872	nuclease activity|nucleus|metal ion binding
LOC103400348	0	0	0	0	0	0	At5g20260	probable glycosyltransferase At5g20260	GO:0000139,GO:0006486,GO:0016021,GO:0016757,GO:0071555	Golgi membrane|protein glycosylation|integral component of membrane|transferase activity, transferring glycosyl groups|cell wall organization
LOC103400352	0.489312	0.595631	0.199023	0.502916	0.622747	0.74237		uncharacterized LOC103400352
LOC103400354	0	0	0	0	0	0		ribonuclease-like storage protein	GO:0003723,GO:0033897,GO:0045735	RNA binding|ribonuclease T2 activity|nutrient reservoir activity
LOC103400356	20.8289	16.83	21.2671	16.7249	23.6978	12.6263	At2g20280	zinc finger CCCH domain-containing protein 11-like	GO:0002181,GO:0003677,GO:0005829,GO:0046872	cytoplasmic translation|DNA binding|cytosol|metal ion binding
LOC103400358	8.74885	7.91182	8.49772	7.51155	10.8683	7.80255		uncharacterized LOC103400358
LOC103400359	9.40484	12.3034	11.1231	8.16339	9.66555	6.65127		ras-related protein Rab7	GO:0003924,GO:0005525,GO:0005774,GO:0005886,GO:0006886,GO:0032482	GTPase activity|GTP binding|vacuolar membrane|plasma membrane|intracellular protein transport|Rab protein signal transduction	path:mdm04144,path:mdm04145	Endocytosis|Phagosome
LOC103400360	78.085	85.7656	87.6473	58.5798	54.0037	57.2623		uncharacterized LOC103400360
LOC103400361	0.456868	0.40695	0.248185	0.190162	0.224713	0.251244	PAB5	polyadenylate-binding protein 3	GO:0000289,GO:0003723,GO:0003730,GO:0005634,GO:0005737,GO:0005829,GO:0006413,GO:0006417,GO:0008143,GO:0008266,GO:1990904	nuclear-transcribed mRNA poly(A) tail shortening|RNA binding|mRNA 3'-UTR binding|nucleus|cytoplasm|cytosol|translational initiation|regulation of translation|poly(A) binding|poly(U) RNA binding|ribonucleoprotein complex	path:mdm03013,path:mdm03015,path:mdm03018	RNA transport|mRNA surveillance pathway|RNA degradation
LOC103400362	37.7767	34.1026	32.1004	19.6374	16.97	16.9045		hypoxanthine-guanine phosphoribosyltransferase			path:mdm00230	Purine metabolism
LOC103400363	3.6428	3.52546	3.9187	3.52593	2.30144	3.21	RH39	DEAD-box ATP-dependent RNA helicase 39-like	GO:0004386,GO:0005524,GO:0009507,GO:0016887,GO:0070180,GO:0110102,GO:1901259	helicase activity|ATP binding|chloroplast|ATPase activity|large ribosomal subunit rRNA binding|chloroplast ribulose bisphosphate carboxylase complex assembly|chloroplast rRNA processing
LOC103400364	0	0	0	0	0	0	At1g34110	probable LRR receptor-like serine/threonine-protein kinase At1g34110	GO:0004672,GO:0004674,GO:0005524,GO:0009506,GO:0016021,GO:0046777	protein kinase activity|protein serine/threonine kinase activity|ATP binding|plasmodesma|integral component of membrane|protein autophosphorylation
LOC103400365	6.73553	7.6931	8.95318	12.5922	9.80258	10.1386	MLH3	DNA mismatch repair protein MLH3-like	GO:0003697,GO:0005524,GO:0005634,GO:0005694,GO:0006298,GO:0007131,GO:0016887,GO:0030983,GO:0032300	single-stranded DNA binding|ATP binding|nucleus|chromosome|mismatch repair|reciprocal meiotic recombination|ATPase activity|mismatched DNA binding|mismatch repair complex	path:mdm03430	Mismatch repair
LOC103400367	11.3141	13.8782	12.8438	14.6249	10.8145	12.3843	LSG1-2	GTPase LSG1-2-like	GO:0005525,GO:0005634,GO:0005730,GO:0005829,GO:0006364,GO:0016787,GO:0042254,GO:0043022,GO:0048366,GO:0048825,GO:0090070,GO:2000012	GTP binding|nucleus|nucleolus|cytosol|rRNA processing|hydrolase activity|ribosome biogenesis|ribosome binding|leaf development|cotyledon development|positive regulation of ribosome biogenesis|regulation of auxin polar transport	path:mdm03008	Ribosome biogenesis in eukaryotes
LOC103400372	4.03306	2.73259	3.35421	1.16633	1.0234	1.11331	VRN2	polycomb group protein EMBRYONIC FLOWER 2-like	GO:0003700,GO:0005634,GO:0005677,GO:0006349,GO:0009409,GO:0010048,GO:0031490,GO:0046872	DNA-binding transcription factor activity|nucleus|chromatin silencing complex|regulation of gene expression by genetic imprinting|response to cold|vernalization response|chromatin DNA binding|metal ion binding
LOC103400373	0.215766	0.564829	0.90137	1.08174	0.521493	0.35029	ERF1A	ethylene-responsive transcription factor 2-like	GO:0003677,GO:0003700,GO:0005634,GO:0006952,GO:0009873,GO:0010087,GO:0010200,GO:0051301	DNA binding|DNA-binding transcription factor activity|nucleus|defense response|ethylene-activated signaling pathway|phloem or xylem histogenesis|response to chitin|cell division
LOC103400375	0.761651	1.65807	1.55917	1.75541	1.73981	1.69651	ECT4	YTH domain-containing protein ECT3	GO:0003723,GO:0005737	RNA binding|cytoplasm
LOC103400376	25.1934	25.1248	24.3274	26.7691	26.5699	29.1592	CSN7	COP9 signalosome complex subunit 7-like	GO:0000338,GO:0005829,GO:0007275,GO:0008180,GO:0009585,GO:0010387	protein deneddylation|cytosol|multicellular organism development|COP9 signalosome|red, far-red light phototransduction|COP9 signalosome assembly
LOC103400377	0.183803	0.177911	0.0941481	0	0	0		uncharacterized LOC103400377	GO:0003743,GO:0006417	translation initiation factor activity|regulation of translation
LOC103400378	0.492741	0	0	0.246428	0	0.517448		uncharacterized LOC103400378
LOC103400382	0	0	0	0	0	0.0408933	At4g18930	cyclic phosphodiesterase-like	GO:0004113,GO:0005737,GO:0006388,GO:0009187	2',3'-cyclic-nucleotide 3'-phosphodiesterase activity|cytoplasm|tRNA splicing, via endonucleolytic cleavage and ligation|cyclic nucleotide metabolic process
LOC103400383	0	0	0	0	0	0		uncharacterized LOC103400383
LOC103400384	0	0	0	0	0	0	NAT10	putative nucleobase-ascorbate transporter 10	GO:0016021,GO:0022857	integral component of membrane|transmembrane transporter activity
LOC103400386	0.577987	0.37051	0.401789	0.797349	0.516788	0.663477	PCMP-E7	pentatricopeptide repeat-containing protein At4g31070, mitochondrial
LOC103400394	0	0	0	0	0	0	ACD6	protein ACCELERATED CELL DEATH 6-like	GO:0005887,GO:0008219,GO:0009416,GO:0009615,GO:0009617,GO:0009751,GO:0009816,GO:0016020,GO:0016567,GO:0030176,GO:0050826,GO:0071446,GO:1900150,GO:1900426,GO:1902290,GO:2000031	integral component of plasma membrane|cell death|response to light stimulus|response to virus|response to bacterium|response to salicylic acid|defense response to bacterium, incompatible interaction|membrane|protein ubiquitination|integral component of endoplasmic reticulum membrane|response to freezing|cellular response to salicylic acid stimulus|regulation of defense response to fungus|positive…
LOC103400395	0.199556	0.465332	0.270705	0.822784	0.678838	0.548879	IAA13	auxin-responsive protein IAA20-like	GO:0003700,GO:0005634,GO:0009733,GO:0009734	DNA-binding transcription factor activity|nucleus|response to auxin|auxin-activated signaling pathway	path:mdm04075	Plant hormone signal transduction
LOC103400396	6.44221	5.27057	4.69288	2.76574	2.4425	4.12153	TPR4	topless-related protein 4	GO:0003714,GO:0005634,GO:0006355,GO:0009938,GO:0010072,GO:0010336,GO:1903507	transcription corepressor activity|nucleus|regulation of transcription, DNA-templated|negative regulation of gibberellic acid mediated signaling pathway|primary shoot apical meristem specification|gibberellic acid homeostasis|negative regulation of nucleic acid-templated transcription
LOC103400397	5.00944	4.45346	5.62553	2.65598	2.17748	3.42675	SPAC16E8.13	BRCA1-associated protein-like	GO:0005829,GO:0008270,GO:0023051,GO:0061630,GO:0070647	cytosol|zinc ion binding|regulation of signaling|ubiquitin protein ligase activity|protein modification by small protein conjugation or removal
LOC103400398	14.8284	13.4157	14.1034	12.2012	12.9336	14.4045	At2g25430	putative clathrin assembly protein At2g25430	GO:0005545,GO:0005634,GO:0005794,GO:0005886,GO:0005905,GO:0006897,GO:0030136,GO:0030276,GO:0048268	1-phosphatidylinositol binding|nucleus|Golgi apparatus|plasma membrane|clathrin-coated pit|endocytosis|clathrin-coated vesicle|clathrin binding|clathrin coat assembly
LOC103400399	6.30225	8.55925	5.97954	3.46695	2.76955	3.63572	ARP6	actin-related protein 6-like	GO:0005200,GO:0005634,GO:0005737,GO:0006338,GO:0006355,GO:0006952,GO:0006970,GO:0008283,GO:0009266,GO:0009845,GO:0009910,GO:0030029	structural constituent of cytoskeleton|nucleus|cytoplasm|chromatin remodeling|regulation of transcription, DNA-templated|defense response|response to osmotic stress|cell proliferation|response to temperature stimulus|seed germination|negative regulation of flower development|actin filament-based process
LOC103400400	11.1085	13.5214	12.3076	8.04957	6.72341	9.4567		WD repeat-containing protein 11-like
LOC103400401	0	0	0	0.0365446	0	0	ACD6	ankyrin repeat-containing protein At5g02620-like	GO:0005887,GO:0008219,GO:0009416,GO:0009615,GO:0009617,GO:0009751,GO:0009816,GO:0016020,GO:0016567,GO:0030176,GO:0050826,GO:0071446,GO:1900150,GO:1900426,GO:1902290,GO:2000031	integral component of plasma membrane|cell death|response to light stimulus|response to virus|response to bacterium|response to salicylic acid|defense response to bacterium, incompatible interaction|membrane|protein ubiquitination|integral component of endoplasmic reticulum membrane|response to freezing|cellular response to salicylic acid stimulus|regulation of defense response to fungus|positive…
LOC103400402	0.0328536	0.0953161	0.0370847	0.201655	0.0312746	0.035259	BCB	uclacyanin-3-like	GO:0002239,GO:0005773,GO:0005886,GO:0006979,GO:0009055,GO:0009646,GO:0015690,GO:0031225,GO:0046658,GO:0046872,GO:0070417,GO:1901141	response to oomycetes|vacuole|plasma membrane|response to oxidative stress|electron transfer activity|response to absence of light|aluminum cation transport|anchored component of membrane|anchored component of plasma membrane|metal ion binding|cellular response to cold|regulation of lignin biosynthetic process
LOC103400403	0	0.107994	0.0842908	0	0.0351357	0	At2g25060	blue copper protein-like	GO:0005886,GO:0009055,GO:0009506,GO:0031225,GO:0046658	plasma membrane|electron transfer activity|plasmodesma|anchored component of membrane|anchored component of plasma membrane
LOC103400405	5.39995	7.02264	6.52574	5.2798	5.01699	5.35171	MBD10	methyl-CpG-binding domain-containing protein 11-like	GO:0005634,GO:0005829,GO:0008327	nucleus|cytosol|methyl-CpG binding
LOC103400406	0.140546	0.181319	0.263535	0.145645	0	0.296936	At4g02530	thylakoid lumenal 16.5 kDa protein, chloroplastic-like	GO:0009507,GO:0009534,GO:0009535,GO:0009543,GO:0009570,GO:0009579,GO:0009735,GO:0009941,GO:0010206,GO:0031977	chloroplast|chloroplast thylakoid|chloroplast thylakoid membrane|chloroplast thylakoid lumen|chloroplast stroma|thylakoid|response to cytokinin|chloroplast envelope|photosystem II repair|thylakoid lumen
LOC103400409	0	0	0	0	0	0	YAB5	axial regulator YABBY 5-like	GO:0003677,GO:0003700,GO:0005634,GO:0006355,GO:0009944,GO:0010158,GO:0045165,GO:0046872,GO:1902183,GO:2000024	DNA binding|DNA-binding transcription factor activity|nucleus|regulation of transcription, DNA-templated|polarity specification of adaxial/abaxial axis|abaxial cell fate specification|cell fate commitment|metal ion binding|regulation of shoot apical meristem development|regulation of leaf development
LOC103400410	7.45574	6.33696	6.76613	4.77932	3.25659	4.05728	NUP1	nuclear pore complex protein NUP1	GO:0005635,GO:0005643,GO:0005829,GO:0006997,GO:0016973,GO:0034399,GO:0071763	nuclear envelope|nuclear pore|cytosol|nucleus organization|poly(A)+ mRNA export from nucleus|nuclear periphery|nuclear membrane organization
LOC103400411	3.84642	4.87372	5.71796	5.82162	9.01582	4.36021		uncharacterized LOC103400411
LOC103400412	42.1894	37.7725	38.4288	28.889	36.3288	27.4275		phosphomannomutase	GO:0004615,GO:0005829,GO:0006013,GO:0006487,GO:0009298,GO:0045047	phosphomannomutase activity|cytosol|mannose metabolic process|protein N-linked glycosylation|GDP-mannose biosynthetic process|protein targeting to ER	path:mdm00051,path:mdm00520	Fructose and mannose metabolism|Amino sugar and nucleotide sugar metabolism
LOC103400414	0	0	0	0	0	0.0737658	ETN8	equilibrative nucleotide transporter 8-like	GO:0005337,GO:0005886,GO:0016021	nucleoside transmembrane transporter activity|plasma membrane|integral component of membrane
LOC103400415	3.61023	5.52158	5.5233	7.44962	5.18328	3.46738	EBF2	EIN3-binding F-box protein 1-like	GO:0005634,GO:0006511,GO:0009723,GO:0009873,GO:0010105,GO:0016567,GO:0019005,GO:0031146	nucleus|ubiquitin-dependent protein catabolic process|response to ethylene|ethylene-activated signaling pathway|negative regulation of ethylene-activated signaling pathway|protein ubiquitination|SCF ubiquitin ligase complex|SCF-dependent proteasomal ubiquitin-dependent protein catabolic process	path:mdm04016,path:mdm04075	MAPK signaling pathway - plant|Plant hormone signal transduction
LOC103400419	0	0	0	0	0	0	WIN1	ethylene-responsive transcription factor WIN1-like	GO:0003700,GO:0005634,GO:0009414,GO:0009873,GO:0010143,GO:0010166,GO:0043565	DNA-binding transcription factor activity|nucleus|response to water deprivation|ethylene-activated signaling pathway|cutin biosynthetic process|wax metabolic process|sequence-specific DNA binding
LOC103400420	0.830166	0.799922	0.429636	0.468993	0.420479	0.0674117		uncharacterized LOC103400420
LOC103400421	76.4264	88.2013	70.717	84.8859	76.0564	79.0143	HO1	heme oxygenase 1, chloroplastic-like	GO:0004392,GO:0006788,GO:0009507,GO:0009813,GO:0010019,GO:0010024,GO:0010075,GO:0010119,GO:0015979,GO:0016117,GO:0020037,GO:0046872,GO:0071494	heme oxygenase (decyclizing) activity|heme oxidation|chloroplast|flavonoid biosynthetic process|chloroplast-nucleus signaling pathway|phytochromobilin biosynthetic process|regulation of meristem growth|regulation of stomatal movement|photosynthesis|carotenoid biosynthetic process|heme binding|metal ion binding|cellular response to UV-C	path:mdm00860	Porphyrin and chlorophyll metabolism
LOC103400423	0	0	0	0	0	0	At2g17570	dehydrodolichyl diphosphate synthase 6-like	GO:0002094,GO:0005783,GO:0006486,GO:0016094	polyprenyltransferase activity|endoplasmic reticulum|protein glycosylation|polyprenol biosynthetic process	path:mdm00900	Terpenoid backbone biosynthesis
LOC103400425	0.275877	0	0.131794	0	0.036694	0.123212	DBR	2-alkenal reductase (NADP(+)-dependent)-like	GO:0016491	oxidoreductase activity
LOC103400426	0.18067	0.173179	0.361683	0.260939	0.100801	0.0375848	DBR	2-alkenal reductase (NADP(+)-dependent)-like	GO:0016491	oxidoreductase activity
LOC103400427	0.0804384	0.0193273	0.0224675	1.43692	2.53553	1.36232		ent-kaur-16-ene synthase, chloroplastic-like	GO:0000287,GO:0009507,GO:0009686,GO:0009899	magnesium ion binding|chloroplast|gibberellin biosynthetic process|ent-kaurene synthase activity	path:mdm00904	Diterpenoid biosynthesis
LOC103400428	0.747552	0.702211	0.552446	0.193313	0.0441724	0.14844	GLCAT14B	beta-glucuronosyltransferase GlcAT14B-like	GO:0000139,GO:0008375,GO:0015020,GO:0016021	Golgi membrane|acetylglucosaminyltransferase activity|glucuronosyltransferase activity|integral component of membrane
LOC103400430	66.9487	65.7605	71.1948	58.6705	66.2031	68.4672	At4g32390	probable sugar phosphate/phosphate translocator At4g32390	GO:0005768,GO:0005794,GO:0005802,GO:0008643,GO:0016021	endosome|Golgi apparatus|trans-Golgi network|carbohydrate transport|integral component of membrane
LOC103400433	16.0833	14.4478	15.8752	15.8609	16.334	15.1918	At2g37990	ribosome biogenesis regulatory protein homolog	GO:0000055,GO:0000447,GO:0005730,GO:0030687,GO:0042273	ribosomal large subunit export from nucleus|endonucleolytic cleavage in ITS1 to separate SSU-rRNA from 5.8S rRNA and LSU-rRNA from tricistronic rRNA transcript (SSU-rRNA, 5.8S rRNA, LSU-rRNA)|nucleolus|preribosome, large subunit precursor|ribosomal large subunit biogenesis
LOC103400435	42.4976	52.0809	53.8706	44.0522	49.1518	46.9048	ATJ49	chaperone protein dnaJ 49-like	GO:0016021	integral component of membrane	path:mdm04141	Protein processing in endoplasmic reticulum
LOC103400438	14.1602	12.9852	13.9	10.9394	14.3357	12.229	EMB1187	probable ethanolamine kinase	GO:0004305,GO:0005524,GO:0005886,GO:0006646,GO:0008654	ethanolamine kinase activity|ATP binding|plasma membrane|phosphatidylethanolamine biosynthetic process|phospholipid biosynthetic process	path:mdm00564	Glycerophospholipid metabolism
LOC103400439	3.89092	3.34644	5.25153	2.89093	2.84428	2.31834	At1g55270	F-box/kelch-repeat protein At1g55270-like
LOC103400440	2.02217	1.43557	1.55661	1.23105	0.799792	1.29521		uncharacterized LOC103400440
LOC103400441	5.03501	6.8948	6.7765	4.42126	5.81555	4.79381	MED17	mediator of RNA polymerase II transcription subunit 17	GO:0003712,GO:0006357,GO:0016592,GO:0035196,GO:0070847	transcription coregulator activity|regulation of transcription by RNA polymerase II|mediator complex|production of miRNAs involved in gene silencing by miRNA|core mediator complex
LOC103400445	57.7607	44.0943	45.1698	59.2641	77.0292	58.0865	At1g80180	MAPK kinase substrate protein At1g80180	GO:0005886,GO:0010375	plasma membrane|stomatal complex patterning
LOC103400446	0	0	0	0.202078	0.414523	0.2058		uncharacterized LOC103400446	GO:0003774,GO:0005874,GO:0005930,GO:0007017,GO:0030286,GO:0031514,GO:0044458,GO:0097014	motor activity|microtubule|axoneme|microtubule-based process|dynein complex|motile cilium|motile cilium assembly|ciliary plasm
LOC103400447	0.0323988	0.0311556	0	0	0	0.033801		uncharacterized LOC103400447
LOC103400448	4.93955	4.75416	4.47855	5.70715	5.14342	6.79769	NUDT19	nudix hydrolase 19, chloroplastic	GO:0000210,GO:0005777,GO:0005829,GO:0006734,GO:0006742,GO:0009507,GO:0016787,GO:0019677,GO:0035529,GO:0046872	NAD+ diphosphatase activity|peroxisome|cytosol|NADH metabolic process|NADP catabolic process|chloroplast|hydrolase activity|NAD catabolic process|NADH pyrophosphatase activity|metal ion binding	path:mdm00760,path:mdm04146	Nicotinate and nicotinamide metabolism|Peroxisome
LOC103400450	3.45722	3.20589	3.20076	2.57916	2.36333	2.9003	PCMP-H12	pentatricopeptide repeat-containing protein At1g08070, chloroplastic
LOC103400451	13.7565	12.2665	11.4026	25.4659	17.034	10.6588	SPAC17H9.04c	uncharacterized RNA-binding protein C17H9.04c	GO:0003723,GO:0005730,GO:0046872	RNA binding|nucleolus|metal ion binding
LOC103400453	0	0	0.032549	0	0	0	PID2	protein kinase PINOID 2-like	GO:0004674,GO:0005524,GO:0005634,GO:0005737,GO:0005886,GO:0006468,GO:0009734,GO:0016301,GO:0048825	protein serine/threonine kinase activity|ATP binding|nucleus|cytoplasm|plasma membrane|protein phosphorylation|auxin-activated signaling pathway|kinase activity|cotyledon development
LOC103400454	3.30898	3.73431	4.73401	4.62472	4.91363	5.73544	SSL5	protein STRICTOSIDINE SYNTHASE-LIKE 5-like	GO:0005773,GO:0005783,GO:0009058,GO:0009615,GO:0009620,GO:0009723,GO:0009751,GO:0009753,GO:0016020	vacuole|endoplasmic reticulum|biosynthetic process|response to virus|response to fungus|response to ethylene|response to salicylic acid|response to jasmonic acid|membrane
LOC103400455	0.246284	0.316803	0	0	0	0		uncharacterized LOC103400455
LOC103400457	9.95827	10.0495	9.24135	9.05309	9.50564	9.36234	At4g17486	deSI-like protein At4g17486	GO:0008233	peptidase activity
LOC103400458	38.5023	33.7427	38.7794	23.9231	29.3098	19.6797	FGRAMPH1_01T20223	acyl-protein thioesterase 1	GO:0005737,GO:0006631,GO:0052689	cytoplasm|fatty acid metabolic process|carboxylic ester hydrolase activity	path:mdm00564	Glycerophospholipid metabolism
LOC103400459	0	0	0	0	0	0	At5g20050	probable receptor-like protein kinase At5g20050
LOC103400460	11.0023	9.75993	11.5721	9.66166	7.67982	8.56577	PRMT10	protein arginine N-methyltransferase PRMT10-like	GO:0005829,GO:0006355,GO:0008469,GO:0010228,GO:0016277,GO:0019919,GO:0034969,GO:0035241,GO:0035242	cytosol|regulation of transcription, DNA-templated|histone-arginine N-methyltransferase activity|vegetative to reproductive phase transition of meristem|[myelin basic protein]-arginine N-methyltransferase activity|peptidyl-arginine methylation, to asymmetrical-dimethyl arginine|histone arginine methylation|protein-arginine omega-N monomethyltransferase activity|protein-arginine omega-N asymmetric…
LOC103400461	1.43723	0.926191	0.904865	1.50576	0.839568	1.19631		uncharacterized LOC103400461
LOC103400462	6.76435	7.85993	7.08751	9.21008	9.77644	11.4458	POSF21	probable transcription factor PosF21	GO:0003677,GO:0003700,GO:0005634,GO:0005737,GO:0005829	DNA binding|DNA-binding transcription factor activity|nucleus|cytoplasm|cytosol
LOC103400465	12.7335	14.1924	12.7711	14.4785	14.0188	13.275		uncharacterized LOC103400465
LOC103400467	1.33398	0.856334	1.31701	0.269012	0.0487786	0.0547908	At3g10130	heme-binding-like protein At3g10130, chloroplastic	GO:0009507,GO:0009535,GO:0010287,GO:0020037	chloroplast|chloroplast thylakoid membrane|plastoglobule|heme binding
LOC103400468	0.635742	0.561908	0.570762	0.717079	0.374899	0.320124	EFM	myb family transcription factor EFM-like	GO:0003677,GO:0003700,GO:0005634,GO:0006355,GO:0009266,GO:0009740,GO:0009908,GO:0010452,GO:0048579,GO:1903507	DNA binding|DNA-binding transcription factor activity|nucleus|regulation of transcription, DNA-templated|response to temperature stimulus|gibberellic acid mediated signaling pathway|flower development|histone H3-K36 methylation|negative regulation of long-day photoperiodism, flowering|negative regulation of nucleic acid-templated transcription
LOC103400469	9.94308	9.34539	9.52957	6.13176	6.34405	7.05396	GRP10	U1 small nuclear ribonucleoprotein 70 kDa	GO:0003723	RNA binding
LOC103400470	1.95674	2.66378	5.15688	4.5546	6.55439	6.1603	GAI1	DELLA protein GAI-like			path:mdm04075	Plant hormone signal transduction
LOC103400475	0	0.0997044	0	0.0351519	0.0327375	0.0733734	GA3OX3	gibberellin 3-beta-dioxygenase 3-like	GO:0009686,GO:0009739,GO:0009845,GO:0016707,GO:0046872,GO:0051213	gibberellin biosynthetic process|response to gibberellin|seed germination|gibberellin 3-beta-dioxygenase activity|metal ion binding|dioxygenase activity	path:mdm00904	Diterpenoid biosynthesis
LOC103400476	6.97686	6.64248	6.26531	3.75421	2.87	4.02105	LUG	transcriptional corepressor LEUNIG-like	GO:0001077,GO:0001666,GO:0005634,GO:0006974,GO:0006979,GO:0009414,GO:0009611,GO:0009617,GO:0009620,GO:0009624,GO:0009733,GO:0009908,GO:0009909,GO:0009944,GO:0010073,GO:0010272,GO:0010393,GO:0030154,GO:0045892,GO:0045995,GO:0046898,GO:0048359,GO:0051512,GO:0071217,GO:0080001,GO:1902074,GO:1902183,GO:2000024	proximal promoter DNA-binding transcription activator activity, RNA polymerase II-specific|response to hypoxia|nucleus|cellular response to DNA damage stimulus|response to oxidative stress|response to water deprivation|response to wounding|response to bacterium|response to fungus|response to nematode|response to auxin|flower development|regulation of flower development|polarity specification of a…
LOC103400477	9.07199	9.4559	9.06852	8.76858	8.21578	7.95747	RMI1	tudor domain-containing protein 3	GO:0000166,GO:0000712,GO:0000724,GO:0005654,GO:0016604,GO:0031422	nucleotide binding|resolution of meiotic recombination intermediates|double-strand break repair via homologous recombination|nucleoplasm|nuclear body|RecQ helicase-Topo III complex
LOC103400478	16.4859	17.371	17.1728	21.3542	23.2318	25.0896	PGR	protein PGR	GO:0005886,GO:0016021	plasma membrane|integral component of membrane
LOC103400479	18.3175	20.4491	20.638	26.4181	27.0427	29.4081	B'KAPPA	serine/threonine protein phosphatase 2A 57 kDa regulatory subunit B' kappa isoform-like	GO:0000159,GO:0005634,GO:0005737,GO:0005829,GO:0007165,GO:0031952,GO:0072542	protein phosphatase type 2A complex|nucleus|cytoplasm|cytosol|signal transduction|regulation of protein autophosphorylation|protein phosphatase activator activity	path:mdm03015	mRNA surveillance pathway
LOC103400480	0	0	0	0	0	0	IAA14	auxin-responsive protein IAA1-like	GO:0003700,GO:0005634,GO:0009733,GO:0009734,GO:0010102,GO:0045892	DNA-binding transcription factor activity|nucleus|response to auxin|auxin-activated signaling pathway|lateral root morphogenesis|negative regulation of transcription, DNA-templated	path:mdm04075	Plant hormone signal transduction
LOC103400481	26.9858	30.8464	30.296	33.3528	43.7452	38.5047	FATB1	palmitoyl-acyl carrier protein thioesterase, chloroplastic-like	GO:0006633,GO:0009507,GO:0016790	fatty acid biosynthetic process|chloroplast|thiolester hydrolase activity	path:mdm00061	Fatty acid biosynthesis
LOC103400482	0	0	0.0487448	0	0	0	YLS3	protein YLS3-like	GO:0005886,GO:0006869,GO:0008289,GO:0031225	plasma membrane|lipid transport|lipid binding|anchored component of membrane
LOC103400483	12.6314	15.3013	14.1039	10.0524	6.31153	10.1893	GRV2	dnaJ homolog subfamily C GRV2-like	GO:0000578,GO:0005770,GO:0005773,GO:0005774,GO:0005783,GO:0005794,GO:0005802,GO:0006623,GO:0006897,GO:0006898,GO:0007032,GO:0007033,GO:0009638,GO:0009660,GO:0009793,GO:0009959,GO:0010008,GO:0031902,GO:0042594,GO:0043231,GO:0045324,GO:0051301	embryonic axis specification|late endosome|vacuole|vacuolar membrane|endoplasmic reticulum|Golgi apparatus|trans-Golgi network|protein targeting to vacuole|endocytosis|receptor-mediated endocytosis|endosome organization|vacuole organization|phototropism|amyloplast organization|embryo development ending in seed dormancy|negative gravitropism|endosome membrane|late endosome membrane|response to sta…
LOC103400484	34.5113	34.1889	37.0568	26.7982	26.2561	23.5782	At1g67300	probable plastidic glucose transporter 2	GO:0008643,GO:0016021,GO:0022857,GO:0031969	carbohydrate transport|integral component of membrane|transmembrane transporter activity|chloroplast membrane
LOC103400485	10.4664	10.2771	11.4549	9.70022	14.1648	7.87584		uncharacterized LOC103400485
LOC103400486	53.7041	38.122	46.678	41.4514	26.7209	28.6376	AIM1	peroxisomal fatty acid beta-oxidation multifunctional protein AIM1-like	GO:0003729,GO:0003857,GO:0004165,GO:0004300,GO:0005618,GO:0005777,GO:0006635,GO:0008017,GO:0008692,GO:0009506,GO:0009507,GO:0009695,GO:0009908,GO:0018812	mRNA binding|3-hydroxyacyl-CoA dehydrogenase activity|dodecenoyl-CoA delta-isomerase activity|enoyl-CoA hydratase activity|cell wall|peroxisome|fatty acid beta-oxidation|microtubule binding|3-hydroxybutyryl-CoA epimerase activity|plasmodesma|chloroplast|jasmonic acid biosynthetic process|flower development|3-hydroxyacyl-CoA dehydratase activity	path:mdm00071,path:mdm00592	Fatty acid degradation|alpha-Linolenic acid metabolism
LOC103400487	0.643178	1.21301	1.27396	1.04922	1.154	0.744989	TCX5	protein tesmin/TSO1-like CXC 5	GO:0003700,GO:0005634,GO:0006355,GO:0007275,GO:0046872	DNA-binding transcription factor activity|nucleus|regulation of transcription, DNA-templated|multicellular organism development|metal ion binding
LOC103400488	9.93005	7.94043	8.16725	6.34955	5.82206	6.98478		RNA-binding protein FUS-like
LOC103400489	8.44208	7.08507	6.02345	5.57609	6.32882	6.43917		uncharacterized LOC103400489
LOC103400490	0.0719937	0.208711	0.364903	0.408333	0.439813	0.53084		endochitinase-like	GO:0000272,GO:0004568,GO:0006032,GO:0006952,GO:0008061,GO:0016998	polysaccharide catabolic process|chitinase activity|chitin catabolic process|defense response|chitin binding|cell wall macromolecule catabolic process	path:mdm00520,path:mdm04016	Amino sugar and nucleotide sugar metabolism|MAPK signaling pathway - plant
LOC103400491	0.0688932	0	0.0388071	0.0178298	0	0	ROPGEF8	rho guanine nucleotide exchange factor 8	GO:0005085,GO:0005089,GO:0005886,GO:0042802	guanyl-nucleotide exchange factor activity|Rho guanyl-nucleotide exchange factor activity|plasma membrane|identical protein binding
LOC103400492	0.0387457	0.112307	0	0	0	0	Os01g0760900	probable protein ABIL5	GO:0005737,GO:0005856	cytoplasm|cytoskeleton
LOC103400493	0.119336	0.116676	0.0683165	0.282858	0.487848	0.12851	TLP1	thaumatin-like protein 1	GO:0006952,GO:0009617,GO:0009723	defense response|response to bacterium|response to ethylene
LOC103400494	10.6013	12.7036	12.8748	11.8851	9.11561	10.7866		uncharacterized LOC103400494
LOC103400495	5.77178	6.8426	6.79937	3.46084	2.85508	4.38081	PLSP1	chloroplast processing peptidase	GO:0004252,GO:0006465,GO:0008233,GO:0009507,GO:0009526,GO:0009535,GO:0009941,GO:0010027,GO:0016021,GO:0051604,GO:0055035	serine-type endopeptidase activity|signal peptide processing|peptidase activity|chloroplast|plastid envelope|chloroplast thylakoid membrane|chloroplast envelope|thylakoid membrane organization|integral component of membrane|protein maturation|plastid thylakoid membrane	path:mdm03060	Protein export
LOC103400496	1.03655	1.20025	1.78476	1.13678	0.599655	0.526506	ATC401	pentatricopeptide repeat-containing protein At5g21222-like
LOC103400497	5.93588	4.51625	4.83313	2.50312	2.33922	3.02026	SYM1	PXMP2/4 family protein 2	GO:0005743,GO:0016021	mitochondrial inner membrane|integral component of membrane	path:mdm04146	Peroxisome
LOC103400498	1.00361	1.64376	1.53577	1.36808	0.848921	0.928719	SPAC12B10.08c	tRNA(Ile)-lysidine synthase	GO:0002127,GO:0005524,GO:0005739,GO:0032267,GO:0032543	tRNA wobble base cytosine methylation|ATP binding|mitochondrion|tRNA(Ile)-lysidine synthase activity|mitochondrial translation
LOC103400499	0	0	0	0	0	0		uncharacterized LOC103400499
LOC103400502	1.05545	2.42216	1.71073	0.559716	0.507677	0.449952	NYC1	probable chlorophyll(ide) b reductase NYC1, chloroplastic	GO:0009535,GO:0009536,GO:0010304,GO:0015996,GO:0016021,GO:0016491,GO:0034256	chloroplast thylakoid membrane|plastid|PSII associated light-harvesting complex II catabolic process|chlorophyll catabolic process|integral component of membrane|oxidoreductase activity|chlorophyll(ide) b reductase activity	path:mdm00860	Porphyrin and chlorophyll metabolism
LOC103400503	4.33753	6.44169	5.11839	6.20306	6.54416	4.10303	cfxQ	protein CbbX-like	GO:0005524,GO:0009507	ATP binding|chloroplast
LOC103400505	0.780578	1.98155	1.08295	1.0773	1.59703	2.85366	PLT5	polyol transporter 5-like	GO:0005351,GO:0005354,GO:0005355,GO:0005365,GO:0005886,GO:0005887,GO:0008645,GO:0010311,GO:0015145,GO:0015148,GO:0015168,GO:0015575,GO:0015576,GO:0015591	carbohydrate:proton symporter activity|galactose transmembrane transporter activity|glucose transmembrane transporter activity|myo-inositol transmembrane transporter activity|plasma membrane|integral component of plasma membrane|hexose transmembrane transport|lateral root formation|monosaccharide transmembrane transporter activity|D-xylose transmembrane transporter activity|glycerol transmembrane…
LOC103400507	0.0747148	0	0.253317	0	0	0.0400142	OFP8	transcription repressor OFP8-like	GO:0005634,GO:0045892	nucleus|negative regulation of transcription, DNA-templated
LOC103400508	0.0378269	0	0	0	0	0		uncharacterized LOC103400508
LOC103400510	0	0	0	0.247981	0.901314	0.100987		uncharacterized LOC103400510
LOC103400512	0.921419	0.146838	0.515138	1.71815	1.80737	0.745376	YUC2	indole-3-pyruvate monooxygenase YUCCA2-like	GO:0004499,GO:0009851,GO:0050660,GO:0050661,GO:0103075	N,N-dimethylaniline monooxygenase activity|auxin biosynthetic process|flavin adenine dinucleotide binding|NADP binding|indole-3-pyruvate monooxygenase activity	path:mdm00380	Tryptophan metabolism
LOC103400515	16.3429	15.9088	18.5344	0.583086	1.0075	0.818827	CIPK24	CBL-interacting serine/threonine-protein kinase 24-like	GO:0004672,GO:0004674,GO:0005524,GO:0005634,GO:0005737,GO:0006468,GO:0009651,GO:0009705,GO:0035556	protein kinase activity|protein serine/threonine kinase activity|ATP binding|nucleus|cytoplasm|protein phosphorylation|response to salt stress|plant-type vacuole membrane|intracellular signal transduction
LOC103400516	0	0	0	0	0	0	MKK5	mitogen-activated protein kinase kinase 5-like	GO:0000187,GO:0004674,GO:0004708,GO:0005524,GO:0005737,GO:0009626,GO:0009814,GO:0010227,GO:0010229,GO:0010365,GO:0023014,GO:0031098,GO:0032147	activation of MAPK activity|protein serine/threonine kinase activity|MAP kinase kinase activity|ATP binding|cytoplasm|plant-type hypersensitive response|defense response, incompatible interaction|floral organ abscission|inflorescence development|positive regulation of ethylene biosynthetic process|signal transduction by protein phosphorylation|stress-activated protein kinase signaling cascade|act…
LOC103400517	4.95746	4.78825	4.50828	1.73259	1.12736	1.54961	At1g65240	aspartic proteinase-like protein 2	GO:0004190,GO:0005886,GO:0006508,GO:0030163,GO:0031225,GO:0046658	aspartic-type endopeptidase activity|plasma membrane|proteolysis|protein catabolic process|anchored component of membrane|anchored component of plasma membrane
LOC103400522	0.0384149	0.147724	0	0	0	0.120451	DBR	2-alkenal reductase (NADP(+)-dependent)-like	GO:0016491	oxidoreductase activity
LOC103400530	0.414014	0.752415	0.728097	0.430227	0.391418	0.672564	Os04g0671800	zinc finger CCCH domain-containing protein 32-like	GO:0003677,GO:0003729,GO:0005622,GO:0016973,GO:0046872	DNA binding|mRNA binding|intracellular|poly(A)+ mRNA export from nucleus|metal ion binding
LOC103400532	50.4253	42.033	47.653	47.8306	52.6534	49.014	CBR2	NADH-cytochrome b5 reductase-like protein	GO:0004128,GO:0005507,GO:0005739,GO:0005758,GO:0005794,GO:0009505,GO:0009651	cytochrome-b5 reductase activity, acting on NAD(P)H|copper ion binding|mitochondrion|mitochondrial intermembrane space|Golgi apparatus|plant-type cell wall|response to salt stress	path:mdm00520	Amino sugar and nucleotide sugar metabolism
LOC103400533	0	0	0	0	0	0	SD113	G-type lectin S-receptor-like serine/threonine-protein kinase CES101
LOC103400536	0.084789	0.0820548	0	0.0852478	0	0.0899976	CYP82A3	cytochrome P450 82A3-like	GO:0005506,GO:0016020,GO:0016709,GO:0020037,GO:0042343	iron ion binding|membrane|oxidoreductase activity, acting on paired donors, with incorporation or reduction of molecular oxygen, NAD(P)H as one donor, and incorporation of one atom of oxygen|heme binding|indole glucosinolate metabolic process
LOC103400537	0.321482	0.103469	0.201063	0.0745294	0.337772	0.113086	BBD2	bifunctional nuclease 2-like	GO:0004518,GO:0005634	nuclease activity|nucleus
LOC103400542	0	0	0	0	0	0	CjBAp12	putative EG45-like domain containing protein 1	GO:0005576	extracellular region
LOC103400549	0	0	0	0	0	0	srp101	signal recognition particle receptor subunit alpha-like	GO:0003924,GO:0005047,GO:0005525,GO:0005634,GO:0005785,GO:0005789,GO:0005829,GO:0006614,GO:0016020,GO:0045047	GTPase activity|signal recognition particle binding|GTP binding|nucleus|signal recognition particle receptor complex|endoplasmic reticulum membrane|cytosol|SRP-dependent cotranslational protein targeting to membrane|membrane|protein targeting to ER	path:mdm03060	Protein export
LOC103400552	1.32929	0.972104	1.03575	0.401606	0.21278	0.0433728	UBC37	uncharacterized LOC103400552	GO:0005524,GO:0005634,GO:0006974,GO:0061631	ATP binding|nucleus|cellular response to DNA damage stimulus|ubiquitin conjugating enzyme activity
LOC103400553	10.0737	10.4042	9.42616	8.98422	5.02302	7.88752	NRPB1	DNA-directed RNA polymerase II subunit 1	GO:0003677,GO:0003899,GO:0005665,GO:0005773,GO:0006366,GO:0009506,GO:0009507,GO:0046872	DNA binding|DNA-directed 5'-3' RNA polymerase activity|RNA polymerase II, core complex|vacuole|transcription by RNA polymerase II|plasmodesma|chloroplast|metal ion binding	path:mdm03020	RNA polymerase
LOC103400556	0.211986	0.146511	0.119453	0.475062	0.74143	0.764821	CES101	G-type lectin S-receptor-like serine/threonine-protein kinase CES101
LOC103400557	19.9238	22.1295	19.9512	12.6953	17.174	13.7546		histone acetyltransferase KAT6B-like
LOC103400560	3.92846	3.30325	3.8373	6.4979	8.5469	11.5506		uncharacterized LOC103400560
LOC103400562	0	0	0	0	0	0		uncharacterized LOC103400562
LOC103400563	20.048	22.2513	20.135	25.9284	30.7845	31.9641		uncharacterized LOC103400563
LOC103400564	0.716244	0.689922	0.958941	0.893828	1.10016	0.701162	PCMP-H8	putative pentatricopeptide repeat-containing protein At1g69350, mitochondrial
LOC103400565	3.69264	3.91773	4.01261	3.31628	2.22359	3.08577	FRL4A	FRIGIDA-like protein 4a	GO:0009908,GO:0030154	flower development|cell differentiation
LOC103400567	15.3861	14.8936	15.3749	13.727	12.8253	13.1349	HD16	casein kinase 1-like protein HD16	GO:0004674,GO:0005524,GO:0005634,GO:0005737,GO:0006897,GO:0009740,GO:0009908,GO:0010476,GO:0018105,GO:0018107,GO:0040008,GO:0048586	protein serine/threonine kinase activity|ATP binding|nucleus|cytoplasm|endocytosis|gibberellic acid mediated signaling pathway|flower development|gibberellin mediated signaling pathway|peptidyl-serine phosphorylation|peptidyl-threonine phosphorylation|regulation of growth|regulation of long-day photoperiodism, flowering
LOC103400568	24.8594	6.29878	11.099	21.6452	24.1243	16.0027	MBF1C	multiprotein-bridging factor 1c-like	GO:0003700,GO:0003713,GO:0005730,GO:0005737,GO:0009408,GO:0009414,GO:0009737,GO:0009873,GO:0043565,GO:0045893	DNA-binding transcription factor activity|transcription coactivator activity|nucleolus|cytoplasm|response to heat|response to water deprivation|response to abscisic acid|ethylene-activated signaling pathway|sequence-specific DNA binding|positive regulation of transcription, DNA-templated
LOC103400570	34.8882	41.2993	41.926	36.5037	36.7599	38.9054	At1g52360	coatomer subunit beta'-3-like	GO:0000139,GO:0005198,GO:0006886,GO:0006888,GO:0006890,GO:0006891,GO:0030126	Golgi membrane|structural molecule activity|intracellular protein transport|ER to Golgi vesicle-mediated transport|retrograde vesicle-mediated transport, Golgi to ER|intra-Golgi vesicle-mediated transport|COPI vesicle coat
LOC103400573	0	0	0	0	0	0	SULTR3	probable sulfate transporter 3.5	GO:0008271,GO:0015116,GO:0015293,GO:0015301,GO:0016021	secondary active sulfate transmembrane transporter activity|sulfate transmembrane transporter activity|symporter activity|anion:anion antiporter activity|integral component of membrane
LOC103400575	2.89282	1.84846	2.10765	0.527519	0.423767	0.761879		probable serine incorporator
LOC103400576	3.7021	3.73522	3.79537	3.93379	3.55925	4.72498	VIL1	VIN3-like protein 1	GO:0005634,GO:0005677,GO:0009409,GO:0009908,GO:0010048,GO:0016571,GO:0016607,GO:0031062,GO:0045814,GO:0046872,GO:0048572,GO:0048575,GO:0051571,GO:0061087	nucleus|chromatin silencing complex|response to cold|flower development|vernalization response|histone methylation|nuclear speck|positive regulation of histone methylation|negative regulation of gene expression, epigenetic|metal ion binding|short-day photoperiodism|short-day photoperiodism, flowering|positive regulation of histone H3-K4 methylation|positive regulation of histone H3-K27 methylation
LOC103400577	4.24617	2.70778	3.02099	2.34358	0.63122	1.91961	HCF101	fe-S cluster assembly factor HCF101, chloroplastic	GO:0005524,GO:0009507,GO:0009570,GO:0016226,GO:0046872,GO:0051536,GO:0051539	ATP binding|chloroplast|chloroplast stroma|iron-sulfur cluster assembly|metal ion binding|iron-sulfur cluster binding|4 iron, 4 sulfur cluster binding
LOC103400578	0	0	0	0	0	0	D14	strigolactone esterase D14-like	GO:0005634,GO:0005737,GO:0010223,GO:0016787,GO:1901601	nucleus|cytoplasm|secondary shoot formation|hydrolase activity|strigolactone biosynthetic process
LOC103400579	48.6349	41.4919	49.707	41.449	39.5786	34.8792	At4g13360	3-hydroxyisobutyryl-CoA hydrolase-like protein 3, mitochondrial	GO:0003860,GO:0005739,GO:0005829,GO:0006635	3-hydroxyisobutyryl-CoA hydrolase activity|mitochondrion|cytosol|fatty acid beta-oxidation	path:mdm00280,path:mdm00410,path:mdm00640	Valine, leucine and isoleucine degradation|beta-Alanine metabolism|Propanoate metabolism
LOC103400581	0	0	0	0	0	0	DHQS	3-dehydroquinate synthase, chloroplastic	GO:0003856,GO:0009073,GO:0009423,GO:0009507,GO:0033587,GO:0042802,GO:0046872,GO:0051287	3-dehydroquinate synthase activity|aromatic amino acid family biosynthetic process|chorismate biosynthetic process|chloroplast|shikimate biosynthetic process|identical protein binding|metal ion binding|NAD binding	path:mdm00400	Phenylalanine, tyrosine and tryptophan biosynthesis
LOC103400582	27.6596	33.2984	29.6591	24.4656	37.3379	30.1676	NUDT20	nudix hydrolase 20, chloroplastic-like	GO:0009507,GO:0044715,GO:0046872	chloroplast|8-oxo-dGDP phosphatase activity|metal ion binding
LOC103400583	0	0	0	0	0	0	At3g47570	probable LRR receptor-like serine/threonine-protein kinase At3g47570
LOC103400588	0.154894	0.234762	0.223868	0.369395	0.166599	0.163429	ALDH2C4	aldehyde dehydrogenase family 2 member C4	GO:0004029,GO:0005829,GO:0009699,GO:0043878,GO:0050269	aldehyde dehydrogenase (NAD) activity|cytosol|phenylpropanoid biosynthetic process|glyceraldehyde-3-phosphate dehydrogenase (NAD+) (non-phosphorylating) activity|coniferyl-aldehyde dehydrogenase activity	path:mdm00940	Phenylpropanoid biosynthesis
LOC103400591	41.5119	40.7502	42.1785	36.9969	32.7373	36.01	VPS35A	vacuolar protein sorting-associated protein 35A-like	GO:0005770,GO:0005794,GO:0005829,GO:0006886,GO:0008565,GO:0010008,GO:0030904,GO:0030906,GO:0031902,GO:0042147	late endosome|Golgi apparatus|cytosol|intracellular protein transport|protein transporter activity|endosome membrane|retromer complex|retromer, cargo-selective complex|late endosome membrane|retrograde transport, endosome to Golgi	path:mdm04144	Endocytosis
LOC103400595	4.85392	4.40132	4.2222	4.20519	4.3986	5.41241		uncharacterized LOC103400595
LOC103400596	3.11839	3.03252	3.36208	3.37609	2.13369	1.88267	CDC48C	cell division control protein 48 homolog C-like	GO:0005524,GO:0005634,GO:0005856,GO:0007049,GO:0009524,GO:0015031,GO:0016887,GO:0042254,GO:0051301,GO:0051973,GO:1990275	ATP binding|nucleus|cytoskeleton|cell cycle|phragmoplast|protein transport|ATPase activity|ribosome biogenesis|cell division|positive regulation of telomerase activity|preribosome binding	path:mdm03008	Ribosome biogenesis in eukaryotes
LOC103400597	15.2078	12.2653	12.2662	11.388	9.88278	11.1449		uncharacterized LOC103400597
LOC103400601	19.5119	16.524	17.6634	14.9107	12.5878	14.5678		protein HOMOLOG OF MAMMALIAN LYST-INTERACTING PROTEIN 5-like
LOC103400602	0.016745	0.00806453	0.0188051	0.0608341	0	0.043876	CALS12	callose synthase 12	GO:0000003,GO:0000148,GO:0003843,GO:0005794,GO:0005886,GO:0006075,GO:0006952,GO:0008360,GO:0009506,GO:0009555,GO:0009620,GO:0009863,GO:0009870,GO:0009965,GO:0010150,GO:0016021,GO:0042742,GO:0050832,GO:0052542,GO:0052544	reproduction|1,3-beta-D-glucan synthase complex|1,3-beta-D-glucan synthase activity|Golgi apparatus|plasma membrane|(1->3)-beta-D-glucan biosynthetic process|defense response|regulation of cell shape|plasmodesma|pollen development|response to fungus|salicylic acid mediated signaling pathway|defense response signaling pathway, resistance gene-dependent|leaf morphogenesis|leaf senescence|integral c…
LOC103400603	25.5688	63.5052	63.284	39.4751	63.3421	23.3259	TIC22L	protein TIC 22-like, chloroplastic	GO:0006457,GO:0009507,GO:0009536,GO:0015031,GO:0016020,GO:0031972	protein folding|chloroplast|plastid|protein transport|membrane|chloroplast intermembrane space
LOC103400604	6.01162	6.13989	6.41052	6.07149	4.41611	4.70482		dentin sialophosphoprotein
LOC103400606	2.65462	1.97742	1.7723	1.1151	1.33703	1.86231	At1g12775	pentatricopeptide repeat-containing protein At1g12775, mitochondrial-like
LOC103400607	2.42504	2.33762	2.43775	2.40484	1.84031	3.15359	At4g14190	pentatricopeptide repeat-containing protein At4g14190, chloroplastic
LOC103400608	0.194883	0.023653	0.109889	0.126881	0.115336	0.232027	CDC20-1	cell division cycle 20.1, cofactor of APC complex-like			path:mdm04120	Ubiquitin mediated proteolysis
LOC103400609	8.75822	9.38765	9.91019	3.10902	1.50873	1.67407	At1g74260	probable phosphoribosylformylglycinamidine synthase, chloroplastic/mitochondrial	GO:0004642,GO:0005524,GO:0005737,GO:0005739,GO:0006189,GO:0006541,GO:0009507,GO:0009555,GO:0009570,GO:0046872,GO:0055046	phosphoribosylformylglycinamidine synthase activity|ATP binding|cytoplasm|mitochondrion|'de novo' IMP biosynthetic process|glutamine metabolic process|chloroplast|pollen development|chloroplast stroma|metal ion binding|microgametogenesis	path:mdm00230	Purine metabolism
LOC103400610	27.051	35.3078	31.3652	28.8682	25.3293	28.4538	SEC23	protein transport protein SEC23	GO:0000139,GO:0003400,GO:0005096,GO:0005783,GO:0005789,GO:0006886,GO:0007030,GO:0008270,GO:0008360,GO:0016236,GO:0030127,GO:0090110	Golgi membrane|regulation of COPII vesicle coating|GTPase activator activity|endoplasmic reticulum|endoplasmic reticulum membrane|intracellular protein transport|Golgi organization|zinc ion binding|regulation of cell shape|macroautophagy|COPII vesicle coat|cargo loading into COPII-coated vesicle	path:mdm04141	Protein processing in endoplasmic reticulum
LOC103400612	5.35325	5.75987	5.41388	5.48327	5.64943	4.67692		uncharacterized LOC103400612
LOC103400613	1.99582	2.43466	2.57886	2.36029	1.73419	2.84111	LECRK72	probable L-type lectin-domain containing receptor kinase VII.2
LOC103400614	4.2806	3.94714	3.60839	4.61607	3.39307	3.89912	At1g09600	probable serine/threonine-protein kinase At1g54610	GO:0004693,GO:0005524,GO:0005634,GO:0006468	cyclin-dependent protein serine/threonine kinase activity|ATP binding|nucleus|protein phosphorylation
LOC103400615	3.1037	3.43005	2.76906	2.81182	2.22376	3.4612	KIN12B	kinesin-like protein KIN-12B	GO:0003777,GO:0005524,GO:0005871,GO:0005874,GO:0007018,GO:0007112,GO:0008017,GO:0008574,GO:0009524,GO:0016887,GO:0055046,GO:0080175	microtubule motor activity|ATP binding|kinesin complex|microtubule|microtubule-based movement|male meiosis cytokinesis|microtubule binding|ATP-dependent microtubule motor activity, plus-end-directed|phragmoplast|ATPase activity|microgametogenesis|phragmoplast microtubule organization
LOC103400616	77.1522	67.9096	48.246	1.04351	0.956293	0.600978		cysteine proteinase inhibitor B	GO:0004869	cysteine-type endopeptidase inhibitor activity
LOC103400617	12.042	9.80011	12.4244	7.33147	7.9988	7.32619	RPS8	40S ribosomal protein S8	GO:0000462,GO:0003735,GO:0006412,GO:0022627	maturation of SSU-rRNA from tricistronic rRNA transcript (SSU-rRNA, 5.8S rRNA, LSU-rRNA)|structural constituent of ribosome|translation|cytosolic small ribosomal subunit	path:mdm03010	Ribosome
LOC103400618	8.63688	8.75446	8.8343	13.147	11.0626	12.1604	BHLH62	transcription factor bHLH77	GO:0003700,GO:0005634,GO:0006355,GO:0043565,GO:0046983	DNA-binding transcription factor activity|nucleus|regulation of transcription, DNA-templated|sequence-specific DNA binding|protein dimerization activity
LOC103400619	85.1689	82.1741	71.1663	87.0195	88.0272	113.611	PDS	15-cis-phytoene desaturase, chloroplastic/chromoplastic	GO:0009507,GO:0009509,GO:0016020,GO:0016117,GO:0016120,GO:0016166	chloroplast|chromoplast|membrane|carotenoid biosynthetic process|carotene biosynthetic process|phytoene dehydrogenase activity	path:mdm00906	Carotenoid biosynthesis
LOC103400620	26.2444	38.9904	34.2599	39.0318	42.2885	42.8251	At4g31480	coatomer subunit beta-1-like	GO:0000139,GO:0005198,GO:0005829,GO:0006886,GO:0006888,GO:0006891,GO:0009506,GO:0030126	Golgi membrane|structural molecule activity|cytosol|intracellular protein transport|ER to Golgi vesicle-mediated transport|intra-Golgi vesicle-mediated transport|plasmodesma|COPI vesicle coat
LOC103400621	8.0457	8.39374	7.36683	6.30843	4.52269	6.44996	At2g32000	DNA topoisomerase 3-beta	GO:0003677,GO:0003729,GO:0003916,GO:0003917,GO:0005634,GO:0006265,GO:0046872	DNA binding|mRNA binding|DNA topoisomerase activity|DNA topoisomerase type I activity|nucleus|DNA topological change|metal ion binding	path:mdm03440	Homologous recombination
LOC103400622	8.22548	8.34418	7.1456	12.0128	5.95966	7.00203	RPS1	30S ribosomal protein S1 homolog	GO:0003723,GO:0005840,GO:0009507	RNA binding|ribosome|chloroplast
LOC103400623	7.0554	7.03684	5.97339	7.93867	9.54008	8.47827		uncharacterized LOC103400623
LOC103400624	0.316142	0.178579	0.187619	0.0771908	0.121417	0.194103	PCMP-H42	pentatricopeptide repeat-containing protein At2g22070-like
LOC103400625	16.6389	20.3641	16.3321	12.7816	12.7214	16.2028	At1g14780	MACPF domain-containing protein At1g14780-like	GO:0005886,GO:0006955,GO:0009626	plasma membrane|immune response|plant-type hypersensitive response
LOC103400626	2.23034	2.28026	2.97784	2.24811	2.08741	2.24986	MEE12	TATA box-binding protein-associated factor RNA polymerase I subunit B	GO:0001164,GO:0001188,GO:0005668,GO:0009793,GO:0042790,GO:0046872,GO:0070860	RNA polymerase I CORE element sequence-specific DNA binding|RNA polymerase I preinitiation complex assembly|RNA polymerase transcription factor SL1 complex|embryo development ending in seed dormancy|nucleolar large rRNA transcription by RNA polymerase I|metal ion binding|RNA polymerase I core factor complex
LOC103400627	7.43796	6.72851	6.53569	5.75588	6.11495	7.1243	At5g03795	uncharacterized LOC103400627	GO:0000139,GO:0006486,GO:0016021,GO:0016757,GO:0071555	Golgi membrane|protein glycosylation|integral component of membrane|transferase activity, transferring glycosyl groups|cell wall organization
LOC103400629	4.22475	4.92267	5.02851	5.03724	3.39362	4.30654	At2g20020	CRS2-associated factor 1, chloroplastic-like	GO:0000373,GO:0003723,GO:0006397,GO:0009570	Group II intron splicing|RNA binding|mRNA processing|chloroplast stroma
LOC103400631	40.986	68.1059	46.7913	60.4238	68.5288	62.1328	STP14	sugar transport protein 14-like	GO:0005351,GO:0005355,GO:0005886,GO:0005887,GO:0008645	carbohydrate:proton symporter activity|glucose transmembrane transporter activity|plasma membrane|integral component of plasma membrane|hexose transmembrane transport
LOC103400633	0	0	0	0	0	0	Os04g0338000	probable aldo-keto reductase 2	GO:0016491	oxidoreductase activity
LOC103400634	0	0	0.034492	0	0	0	ATL42	E3 ubiquitin-protein ligase ATL42-like	GO:0004842,GO:0016021,GO:0016567,GO:0046872	ubiquitin-protein transferase activity|integral component of membrane|protein ubiquitination|metal ion binding
LOC103400635	0	0	0	0	0	0	ATL42	E3 ubiquitin-protein ligase ATL42-like	GO:0004842,GO:0016021,GO:0016567,GO:0046872	ubiquitin-protein transferase activity|integral component of membrane|protein ubiquitination|metal ion binding
LOC103400636	9.385	9.58313	9.37094	8.1829	7.15223	8.4495	At2g20050/At2g20040	protein phosphatase 2C and cyclic nucleotide-binding/kinase domain-containing protein-like	GO:0004674,GO:0004721,GO:0005524,GO:0005886,GO:0046872	protein serine/threonine kinase activity|phosphoprotein phosphatase activity|ATP binding|plasma membrane|metal ion binding
LOC103400637	63.1233	49.4079	58.2396	53.1833	52.6731	51.2954	At1g67280	probable lactoylglutathione lyase, chloroplastic	GO:0004462,GO:0009409,GO:0009507,GO:0009570,GO:0009579,GO:0010319,GO:0019243,GO:0031977,GO:0046872	lactoylglutathione lyase activity|response to cold|chloroplast|chloroplast stroma|thylakoid|stromule|methylglyoxal catabolic process to D-lactate via S-lactoyl-glutathione|thylakoid lumen|metal ion binding	path:mdm00620	Pyruvate metabolism
LOC103400638	5.61316	4.90437	6.33522	6.96262	6.08324	4.06607	At5g51130	probable RNA methyltransferase At5g51130	GO:0008171,GO:0008173,GO:0017069,GO:0040031	O-methyltransferase activity|RNA methyltransferase activity|snRNA binding|snRNA modification
LOC103400641	1.29051	1.27794	1.15915	1.305	0.981622	1.24234	Os05g0571100	protein WHAT'S THIS FACTOR 1, chloroplastic	GO:0003723,GO:0006397,GO:0008380,GO:0009507	RNA binding|mRNA processing|RNA splicing|chloroplast
LOC103400642	0.186444	0.261861	0.240307	0.398989	0.160864	0.704194	At3g28040	probably inactive leucine-rich repeat receptor-like protein kinase At3g28040
LOC103400643	45.473	45.6785	48.7413	38.7701	42.3931	36.4774	TIF3H1	eukaryotic translation initiation factor 3 subunit H	GO:0001732,GO:0003743,GO:0005829,GO:0005852,GO:0008237,GO:0009733,GO:0009737,GO:0009738,GO:0009744,GO:0009749,GO:0016282,GO:0033290,GO:0034286,GO:0042788,GO:0045948	formation of cytoplasmic translation initiation complex|translation initiation factor activity|cytosol|eukaryotic translation initiation factor 3 complex|metallopeptidase activity|response to auxin|response to abscisic acid|abscisic acid-activated signaling pathway|response to sucrose|response to glucose|eukaryotic 43S preinitiation complex|eukaryotic 48S preinitiation complex|response to maltose…	path:mdm03013	RNA transport
LOC103400645	2.08557	0.297522	0.277363	0.669052	2.4283	0.645413	AVT1H	amino acid transporter AVT1H	GO:0003333,GO:0005774,GO:0015171,GO:0016021	amino acid transmembrane transport|vacuolar membrane|amino acid transmembrane transporter activity|integral component of membrane
LOC103400646	19.4102	31.492	27.0149	15.1507	11.8461	13.0414	Z-ISO	15-cis-zeta-carotene isomerase, chloroplastic	GO:0009507,GO:0016021,GO:0016120,GO:0031969,GO:0090471	chloroplast|integral component of membrane|carotene biosynthetic process|chloroplast membrane|9,15,9'-tri-cis-zeta-carotene isomerase activity	path:mdm00906	Carotenoid biosynthesis
LOC103400647	8.20287	10.7552	11.4456	17.8172	15.3431	15.4578	PPC6-1	probable protein phosphatase 2C 33	GO:0004722,GO:0046872	protein serine/threonine phosphatase activity|metal ion binding
LOC103400648	0	0	0	0	0.0837062	0	RIC4	CRIB domain-containing protein RIC4-like	GO:0005886,GO:0007275,GO:0009860,GO:0010215,GO:0016324,GO:0017157,GO:0030833,GO:0040008,GO:0051650	plasma membrane|multicellular organism development|pollen tube growth|cellulose microfibril organization|apical plasma membrane|regulation of exocytosis|regulation of actin filament polymerization|regulation of growth|establishment of vesicle localization
LOC103400649	26.9467	34.4545	37.9493	39.7271	24.5277	32.3823	SAD2	importin beta-like SAD2	GO:0005634,GO:0005635,GO:0005737,GO:0005829,GO:0006606,GO:0008536,GO:0008565,GO:0035280	nucleus|nuclear envelope|cytoplasm|cytosol|protein import into nucleus|Ran GTPase binding|protein transporter activity|miRNA loading onto RISC involved in gene silencing by miRNA
LOC103400650	41.7632	43.9653	41.824	54.0708	56.0133	49.2966	NIFU4	nifU-like protein 4, mitochondrial	GO:0005198,GO:0005506,GO:0005739,GO:0016226,GO:0051539,GO:0097428	structural molecule activity|iron ion binding|mitochondrion|iron-sulfur cluster assembly|4 iron, 4 sulfur cluster binding|protein maturation by iron-sulfur cluster transfer
LOC103400651	0.482892	0.53066	0.320425	1.03593	0.908107	1.00488	ATX2	histone-lysine N-methyltransferase ATX2	GO:0005634,GO:0006355,GO:0042800,GO:0046872,GO:0051568	nucleus|regulation of transcription, DNA-templated|histone methyltransferase activity (H3-K4 specific)|metal ion binding|histone H3-K4 methylation
LOC103400652	0	0	0	0	0	0		uncharacterized LOC103400652
LOC103400654	0.0856322	0	0	0	0	0	At1g05835	uncharacterized protein At1g05835
LOC103400655	4.04516	3.17808	2.5638	5.07549	4.79027	6.07133	At1g65240	aspartic proteinase-like protein 2	GO:0004190,GO:0005886,GO:0006508,GO:0030163,GO:0031225,GO:0046658	aspartic-type endopeptidase activity|plasma membrane|proteolysis|protein catabolic process|anchored component of membrane|anchored component of plasma membrane
LOC103400657	7.84592	6.99332	6.65962	5.68746	6.65142	7.714	PI4KG2	phosphatidylinositol 4-kinase gamma 2	GO:0004430,GO:0005524,GO:0005773,GO:0009651,GO:0016020	1-phosphatidylinositol 4-kinase activity|ATP binding|vacuole|response to salt stress|membrane
LOC103400658	0.942241	0.658773	0.331872	3.66568	2.16666	1.84786	UGT92A1	UDP-glycosyltransferase 92A1-like	GO:0008194,GO:0016758,GO:0043231	UDP-glycosyltransferase activity|transferase activity, transferring hexosyl groups|intracellular membrane-bounded organelle
LOC103400659	13.694	15.2279	14.4408	32.1888	42.6247	40.8158	CTL1	chitinase-like protein 1	GO:0005794,GO:0006032,GO:0009408,GO:0009414,GO:0009651,GO:0009735,GO:0009825,GO:0009873,GO:0010053,GO:0010167,GO:0010337,GO:0016998,GO:0030244,GO:0030247,GO:0048046	Golgi apparatus|chitin catabolic process|response to heat|response to water deprivation|response to salt stress|response to cytokinin|multidimensional cell growth|ethylene-activated signaling pathway|root epidermal cell differentiation|response to nitrate|regulation of salicylic acid metabolic process|cell wall macromolecule catabolic process|cellulose biosynthetic process|polysaccharide binding|…
LOC103400660	13.6989	10.3611	11.1053	6.49305	7.30602	10.6039	CBL7	calcineurin B-like protein 7	GO:0005509,GO:0005886	calcium ion binding|plasma membrane
LOC103400662	7.92438	6.76986	7.4193	6.99907	4.34339	7.25719	At4g10930	uncharacterized protein At4g10930-like
LOC103400663	0.0675096	0.199624	0.154955	0.161314	0.0327857	0.0734948	At5g39865	uncharacterized protein At3g28850	GO:0005886,GO:0009055,GO:0015035,GO:0045454	plasma membrane|electron transfer activity|protein disulfide oxidoreductase activity|cell redox homeostasis
LOC103400664	164.218	127.218	108.158	117.12	119.93	116.311		probable ATP-dependent RNA helicase ddx42
LOC103400665	3.38152	1.50731	3.0204	5.43782	2.43448	3.69731	ARF9	auxin response factor 9-like	GO:0003700,GO:0005634,GO:0009734,GO:0043565	DNA-binding transcription factor activity|nucleus|auxin-activated signaling pathway|sequence-specific DNA binding	path:mdm04075	Plant hormone signal transduction
LOC103400666	7.29326	7.32657	6.54047	5.74123	8.61948	7.90852	RHA4A	probable E3 ubiquitin-protein ligase RHA4A	GO:0006511,GO:0046872,GO:0061630	ubiquitin-dependent protein catabolic process|metal ion binding|ubiquitin protein ligase activity
LOC103400667	0	0	0	0.0502645	0	0	SWEET4	bidirectional sugar transporter SWEET4-like	GO:0005887,GO:0051119	integral component of plasma membrane|sugar transmembrane transporter activity
LOC103400668	10.4702	11.1529	10.2516	9.3324	9.02449	8.16854	NLP7	protein NLP6	GO:0003677,GO:0003700,GO:0005634,GO:0009414,GO:0010118,GO:0010167,GO:0042128	DNA binding|DNA-binding transcription factor activity|nucleus|response to water deprivation|stomatal movement|response to nitrate|nitrate assimilation
LOC103400669	65.0148	54.1549	59.3251	52.4422	64.1	53.6904	RPN12A	26S proteasome non-ATPase regulatory subunit 8 homolog A	GO:0000502,GO:0005634,GO:0005829,GO:0008541,GO:0009408,GO:0009647,GO:0009733,GO:0009735,GO:0009736,GO:0009908,GO:0009941,GO:0030163,GO:0031540,GO:0043161,GO:0043248,GO:0048366,GO:0048528,GO:0048825,GO:0051788	proteasome complex|nucleus|cytosol|proteasome regulatory particle, lid subcomplex|response to heat|skotomorphogenesis|response to auxin|response to cytokinin|cytokinin-activated signaling pathway|flower development|chloroplast envelope|protein catabolic process|regulation of anthocyanin biosynthetic process|proteasome-mediated ubiquitin-dependent protein catabolic process|proteasome assembly|leaf…	path:mdm03050	Proteasome
LOC103400670	0	0	0	0	0	0	At5g03795	probable glycosyltransferase At5g03795	GO:0000139,GO:0006486,GO:0016021,GO:0016757,GO:0071555	Golgi membrane|protein glycosylation|integral component of membrane|transferase activity, transferring glycosyl groups|cell wall organization
LOC103400671	71.9318	77.0977	76.7611	110.223	95.3342	110.317	KLCR1	protein KINESIN LIGHT CHAIN-RELATED 1-like	GO:0005737,GO:0005874,GO:0005886	cytoplasm|microtubule|plasma membrane
LOC103400673	6.81894	5.39017	6.53527	6.53384	5.39926	7.78507	BAM1	beta-amylase 1, chloroplastic-like	GO:0005634,GO:0005829,GO:0005983,GO:0009414,GO:0009507,GO:0016161,GO:0102229	nucleus|cytosol|starch catabolic process|response to water deprivation|chloroplast|beta-amylase activity|amylopectin maltohydrolase activity	path:mdm00500	Starch and sucrose metabolism
LOC103400674	25.3103	21.657	23.7971	17.2942	20.4028	14.6139	RPS6	30S ribosomal protein S6 alpha, chloroplastic	GO:0003735,GO:0005840,GO:0006412,GO:0009507,GO:0009535,GO:0009579,GO:0070181	structural constituent of ribosome|ribosome|translation|chloroplast|chloroplast thylakoid membrane|thylakoid|small ribosomal subunit rRNA binding	path:mdm03010	Ribosome
LOC103400676	156.839	221.525	219.603	155.65	139.901	141.975	BIP4	luminal-binding protein 5-like	GO:0005524,GO:0005788	ATP binding|endoplasmic reticulum lumen	path:mdm03060,path:mdm04141	Protein export|Protein processing in endoplasmic reticulum
LOC103400677	15.4467	16.9686	14.4605	8.34249	7.88118	8.33616	At1g55090	glutamine-dependent NAD(+) synthetase	GO:0003952,GO:0004359,GO:0005524,GO:0005737,GO:0005829,GO:0009435	NAD+ synthase (glutamine-hydrolyzing) activity|glutaminase activity|ATP binding|cytoplasm|cytosol|NAD biosynthetic process	path:mdm00760	Nicotinate and nicotinamide metabolism
LOC103400678	2.39293	1.89165	2.13071	9.91287	8.78475	8.36439	ABCF3	ABC transporter F family member 3-like	GO:0005215,GO:0005524,GO:0005829,GO:0016887,GO:0042742,GO:0046686	transporter activity|ATP binding|cytosol|ATPase activity|defense response to bacterium|response to cadmium ion
LOC103400680	0.7816	0.713877	0.412678	0.537021	0.0996607	0.280213		uncharacterized LOC103400680
LOC103400682	0	0.160088	0.309317	0	0.052329	0.117288	At3g49055	uncharacterized protein At3g49055-like
LOC103400689	0	0	0	0	0	0		uncharacterized LOC103400689
LOC103400691	0.0738592	0.011848	0.0276362	0	0	0.0258321	PRD1	protein PRD1	GO:0003677,GO:0005634,GO:0016787,GO:0042138	DNA binding|nucleus|hydrolase activity|meiotic DNA double-strand break formation
LOC103400695	0	0	0	0	0	0		vacuolar-processing enzyme-like	GO:0008234	cysteine-type peptidase activity
LOC103400696	0	0	0	0	0	0		vacuolar-processing enzyme-like	GO:0008234	cysteine-type peptidase activity
LOC103400697	0	0	0	0	0	0		vacuolar-processing enzyme-like	GO:0008234	cysteine-type peptidase activity
LOC103400700	2.70681	2.61867	3.14102	0.83293	1.00937	0.649463		sec-independent protein translocase protein TatB
LOC103400702	29.5488	28.9178	29.1253	32.6582	33.2526	35.3202	SPBC2A9.03	uncharacterized WD repeat-containing protein C2A9.03-like	GO:0005829	cytosol
LOC103400703	0.313106	0.536604	0.390687	0.0359535	0	0.146123	At5g08460	GDSL esterase/lipase At5g08460	GO:0005576,GO:0016042,GO:0016788	extracellular region|lipid catabolic process|hydrolase activity, acting on ester bonds
LOC103400706	0	0	0	0	0	0	WUS	protein WUSCHEL-like	GO:0003677,GO:0005634,GO:0009908,GO:0030154	DNA binding|nucleus|flower development|cell differentiation
LOC103400707	0.381111	0.161454	0.153716	0.78615	0.114074	0.300928	ndhB2	NAD(P)H-quinone oxidoreductase subunit 2 A, chloroplastic	GO:0008137,GO:0009535,GO:0016021,GO:0019684,GO:0042773,GO:0048038	NADH dehydrogenase (ubiquinone) activity|chloroplast thylakoid membrane|integral component of membrane|photosynthesis, light reaction|ATP synthesis coupled electron transport|quinone binding	path:mdm00190	Oxidative phosphorylation
LOC103400708	0.529926	0.409642	0.327499	0	0.0250635	0.0563015	RDR3	uncharacterized LOC103400708	GO:0003723,GO:0003968,GO:0005634,GO:0030422,GO:0031380,GO:0070919	RNA binding|RNA-directed 5'-3' RNA polymerase activity|nucleus|production of siRNA involved in RNA interference|nuclear RNA-directed RNA polymerase complex|production of siRNA involved in chromatin silencing by small RNA
LOC103400709	5.53255	5.70189	5.15723	4.68885	5.586	5.14581	GC1	golgin candidate 1-like	GO:0000139,GO:0000301,GO:0005794,GO:0007030,GO:0016021,GO:0031985	Golgi membrane|retrograde transport, vesicle recycling within Golgi|Golgi apparatus|Golgi organization|integral component of membrane|Golgi cisterna
LOC103400711	531.792	571.241	544.156	394.615	315.183	405.754		NADP-dependent malic enzyme	GO:0004471,GO:0004473,GO:0005737,GO:0008948,GO:0046872,GO:0051287	malate dehydrogenase (decarboxylating) (NAD+) activity|malate dehydrogenase (decarboxylating) (NADP+) activity|cytoplasm|oxaloacetate decarboxylase activity|metal ion binding|NAD binding	path:mdm00620,path:mdm00710	Pyruvate metabolism|Carbon fixation in photosynthetic organisms
LOC103400712	26.3085	9.58148	7.54693	3.0801	6.58654	10.1316	PP2C06	protein phosphatase 2C 56-like	GO:0004722,GO:0005634,GO:0005829,GO:0009738,GO:0046872	protein serine/threonine phosphatase activity|nucleus|cytosol|abscisic acid-activated signaling pathway|metal ion binding	path:mdm04016,path:mdm04075	MAPK signaling pathway - plant|Plant hormone signal transduction
LOC103400716	0.296158	0	0	0	0.277096	0.315226		uncharacterized LOC103400716
LOC103400720	0	0	0	0	0	0	UFD1	ubiquitin fusion degradation protein 1 homolog	GO:0000837,GO:0000839,GO:0005634,GO:0030433,GO:0030970,GO:0031593,GO:0034098,GO:0043130,GO:0043161,GO:0051974,GO:0070651,GO:0071629,GO:0071712,GO:0072665,GO:0072671,GO:1900182,GO:1990112,GO:1990116	Doa10p ubiquitin ligase complex|Hrd1p ubiquitin ligase ERAD-L complex|nucleus|ubiquitin-dependent ERAD pathway|retrograde protein transport, ER to cytosol|polyubiquitin modification-dependent protein binding|VCP-NPL4-UFD1 AAA ATPase complex|ubiquitin binding|proteasome-mediated ubiquitin-dependent protein catabolic process|negative regulation of telomerase activity|nonfunctional rRNA decay|cytopl…	path:mdm04141	Protein processing in endoplasmic reticulum
LOC103400721	65.8083	70.225	62.0837	60.1205	53.9431	64.0032	HXK1	hexokinase-1-like	GO:0001678,GO:0004396,GO:0005524,GO:0005536,GO:0006096,GO:0009707,GO:0016021	cellular glucose homeostasis|hexokinase activity|ATP binding|glucose binding|glycolytic process|chloroplast outer membrane|integral component of membrane	path:mdm00010,path:mdm00051,path:mdm00052,path:mdm00500,path:mdm00520	Glycolysis / Gluconeogenesis|Fructose and mannose metabolism|Galactose metabolism|Starch and sucrose metabolism|Amino sugar and nucleotide sugar metabolism
LOC103400724	0	0	0	0	0	0	PME53	probable pectinesterase 53	GO:0005576,GO:0005618,GO:0005737,GO:0030599,GO:0042545,GO:0045330,GO:0045490	extracellular region|cell wall|cytoplasm|pectinesterase activity|cell wall modification|aspartyl esterase activity|pectin catabolic process	path:mdm00040	Pentose and glucuronate interconversions
LOC103400729	11.3721	11.4224	11.7472	13.8956	19.404	13.2104	DER1	derlin-1	GO:0005789,GO:0016021	endoplasmic reticulum membrane|integral component of membrane	path:mdm04141	Protein processing in endoplasmic reticulum
LOC103400730	0.809557	0.631809	0.789206	0.165752	0.202683	0.05714		profilin-4	GO:0003779,GO:0005737,GO:0005856	actin binding|cytoplasm|cytoskeleton
LOC103400731	324.425	307.164	297.667	337.916	398.747	339.781		profilin-2	GO:0003779,GO:0005737,GO:0005856	actin binding|cytoplasm|cytoskeleton
LOC103400732	0.0738867	0.0474388	0.0552996	0.152246	0.0230736	0.0774767	At5g56590	glucan endo-1,3-beta-glucosidase 13	GO:0005576,GO:0005886,GO:0005975,GO:0006952,GO:0009505,GO:0031225,GO:0042973,GO:0046658,GO:0071555	extracellular region|plasma membrane|carbohydrate metabolic process|defense response|plant-type cell wall|anchored component of membrane|glucan endo-1,3-beta-D-glucosidase activity|anchored component of plasma membrane|cell wall organization
LOC103400735	0.338443	0.507724	0.147688	0.351991	0.475428	0.755076		uncharacterized LOC103400735
LOC103400738	0.25237	0.171695	0.132838	0.426856	0.277339	0.311267	NAC075	NAC domain-containing protein 75	GO:0003700,GO:0005634,GO:0007275,GO:0043565,GO:0044212,GO:0045893,GO:0071555,GO:1905177	DNA-binding transcription factor activity|nucleus|multicellular organism development|sequence-specific DNA binding|transcription regulatory region DNA binding|positive regulation of transcription, DNA-templated|cell wall organization|tracheary element differentiation
LOC103400739	42.6834	35.5793	42.9001	44.4202	64.6615	54.6257	At2g19790	AP-4 complex subunit sigma-like	GO:0005802,GO:0005905,GO:0015031,GO:0030124	trans-Golgi network|clathrin-coated pit|protein transport|AP-4 adaptor complex
LOC103400740	27.2135	35.3999	25.6519	1.37707	3.42895	1.24191	MIOX2	inositol oxygenase 1-like	GO:0005506,GO:0005737,GO:0019310,GO:0019853,GO:0050113	iron ion binding|cytoplasm|inositol catabolic process|L-ascorbic acid biosynthetic process|inositol oxygenase activity	path:mdm00053,path:mdm00562	Ascorbate and aldarate metabolism|Inositol phosphate metabolism
LOC103400741	27.9964	19.0538	30.7615	16.1628	7.19967	8.57322	At2g19810	zinc finger CCCH domain-containing protein 20	GO:0003677,GO:0003700,GO:0003727,GO:0005886,GO:0006355,GO:0006979,GO:0046872	DNA binding|DNA-binding transcription factor activity|single-stranded RNA binding|plasma membrane|regulation of transcription, DNA-templated|response to oxidative stress|metal ion binding
LOC103400742	0	0	0	0	0	0	RAX3	transcription factor MYB36-like	GO:0003700,GO:0005634,GO:0007275,GO:0009751,GO:0030154,GO:0043565,GO:0044212	DNA-binding transcription factor activity|nucleus|multicellular organism development|response to salicylic acid|cell differentiation|sequence-specific DNA binding|transcription regulatory region DNA binding
LOC103400743	16.7697	13.1482	16.4701	11.6054	11.4615	10.4418	RPL6	60S ribosomal protein L6-like	GO:0003735,GO:0005840,GO:0006412	structural constituent of ribosome|ribosome|translation	path:mdm03010	Ribosome
LOC103400744	3.00248	1.9398	3.54017	0.758418	0.343686	0.72304	MND1	meiotic nuclear division protein 1 homolog	GO:0003690,GO:0005730,GO:0006302,GO:0007131,GO:0009553,GO:0009555,GO:0010212	double-stranded DNA binding|nucleolus|double-strand break repair|reciprocal meiotic recombination|embryo sac development|pollen development|response to ionizing radiation
LOC103400745	83.9288	82.7354	84.6675	122.507	125.02	113.36	VPS32.1	vacuolar protein sorting-associated protein 32 homolog 2	GO:0000815,GO:0005886,GO:0007034,GO:0015031	ESCRT III complex|plasma membrane|vacuolar transport|protein transport	path:mdm04144	Endocytosis
LOC103400748	5.18733	3.70536	3.44622	3.41665	4.49531	4.15641		uncharacterized LOC103400748
LOC103400749	137.957	127.011	141.558	125.799	176.939	117.238	RPL31	60S ribosomal protein L31	GO:0003735,GO:0005840,GO:0006412	structural constituent of ribosome|ribosome|translation	path:mdm03010	Ribosome
LOC103400750	5.94933	5.82535	6.47202	5.51727	3.27783	4.62646	At5g56730	zinc protease PQQL-like	GO:0004222,GO:0005739,GO:0009507,GO:0009536,GO:0046872	metalloendopeptidase activity|mitochondrion|chloroplast|plastid|metal ion binding
LOC103400751	4.26799	3.37131	3.40617	4.05289	1.95634	2.2909		uncharacterized LOC103400751
LOC103400752	3.85857	4.1646	4.01399	3.01593	3.11727	3.1905	HAG2	histone acetyltransferase type B catalytic subunit	GO:0000781,GO:0000790,GO:0005634,GO:0005829,GO:0006348,GO:0010485,GO:0042393,GO:0043967	chromosome, telomeric region|nuclear chromatin|nucleus|cytosol|chromatin silencing at telomere|H4 histone acetyltransferase activity|histone binding|histone H4 acetylation
LOC103400753	0.248257	0.160571	0.18684	0	0	0	At4g26220	probable caffeoyl-CoA O-methyltransferase At4g26220	GO:0005829,GO:0008757,GO:0009809,GO:0042409,GO:0046872	cytosol|S-adenosylmethionine-dependent methyltransferase activity|lignin biosynthetic process|caffeoyl-CoA O-methyltransferase activity|metal ion binding	path:mdm00940,path:mdm00941,path:mdm00945	Phenylpropanoid biosynthesis|Flavonoid biosynthesis|Stilbenoid, diarylheptanoid and gingerol biosynthesis
LOC103400755	24.5898	14.9715	9.39822	4.12036	2.7302	4.23384	IST1	filaggrin	GO:0005737,GO:0005768,GO:0015031,GO:0032511	cytoplasm|endosome|protein transport|late endosome to vacuole transport via multivesicular body sorting pathway	path:mdm04144	Endocytosis
LOC103400767	1.77024	1.89473	1.50782	0.783847	0.708374	1.1713	RDR3	probable RNA-dependent RNA polymerase 3	GO:0003723,GO:0003968,GO:0005634,GO:0030422,GO:0031380,GO:0070919	RNA binding|RNA-directed 5'-3' RNA polymerase activity|nucleus|production of siRNA involved in RNA interference|nuclear RNA-directed RNA polymerase complex|production of siRNA involved in chromatin silencing by small RNA
LOC103400768	10.5782	8.07169	8.62957	7.30741	5.57446	6.84552	RDR3	probable RNA-dependent RNA polymerase 3	GO:0003723,GO:0003968,GO:0005634,GO:0030422,GO:0031380,GO:0070919	RNA binding|RNA-directed 5'-3' RNA polymerase activity|nucleus|production of siRNA involved in RNA interference|nuclear RNA-directed RNA polymerase complex|production of siRNA involved in chromatin silencing by small RNA
LOC103400771	0.0627619	0.0602076	0	0.227431	0.2635	0.360286	PHP5	pseudo histidine-containing phosphotransfer protein 5-like	GO:0000160,GO:0005634,GO:0005737,GO:0009736,GO:0009927,GO:0043424	phosphorelay signal transduction system|nucleus|cytoplasm|cytokinin-activated signaling pathway|histidine phosphotransfer kinase activity|protein histidine kinase binding	path:mdm04075	Plant hormone signal transduction
LOC103400774	29.2011	47.7638	29.7844	18.0709	19.5461	24.0675		uncharacterized LOC103400774
LOC103400775	0.0145103	0	0.0973975	0	0.0135995	0	MIK1	receptor-like protein kinase 5
LOC103400780	32.3458	23.9366	23.1709	31.0128	25.067	30.7039	GGT3	glutathione hydrolase 3	GO:0000048,GO:0005773,GO:0005774,GO:0006520,GO:0006536,GO:0006749,GO:0006751,GO:0006805,GO:0009636,GO:0016021,GO:0016756,GO:0019344,GO:0036374,GO:0102953,GO:0103068	peptidyltransferase activity|vacuole|vacuolar membrane|cellular amino acid metabolic process|glutamate metabolic process|glutathione metabolic process|glutathione catabolic process|xenobiotic metabolic process|response to toxic substance|integral component of membrane|glutathione gamma-glutamylcysteinyltransferase activity|cysteine biosynthetic process|glutathione hydrolase activity|hypoglycin A …	path:mdm00430,path:mdm00460,path:mdm00480,path:mdm00590	Taurine and hypotaurine metabolism|Cyanoamino acid metabolism|Glutathione metabolism|Arachidonic acid metabolism
LOC103400784	0	0	0	0	0	0		uncharacterized LOC103400784
LOC103400785	1.03938	0.626074	0.716937	0.831135	0.42271	0.540743	PCMP-H42	pentatricopeptide repeat-containing protein At3g24000, mitochondrial-like
LOC103400786	4.0913	2.48993	3.14608	3.37718	2.97363	4.07956	NDL3	protein NDL1	GO:0005737,GO:0040008,GO:2000012	cytoplasm|regulation of growth|regulation of auxin polar transport
LOC103400787	3.69137	2.78726	2.49096	3.17796	2.18221	2.2934	At4g29530	thiamine phosphate phosphatase-like protein	GO:0004427,GO:0009229,GO:0042131,GO:0046872,GO:0051262	inorganic diphosphatase activity|thiamine diphosphate biosynthetic process|thiamine phosphate phosphatase activity|metal ion binding|protein tetramerization	path:mdm00750	Vitamin B6 metabolism
LOC103400789	0.181139	0.351087	0.339321	0.439455	0.712746	0.733293	COAC2	mitochondrial carrier protein CoAc2	GO:0005739,GO:0005743,GO:0015228,GO:0016021,GO:1990559	mitochondrion|mitochondrial inner membrane|coenzyme A transmembrane transporter activity|integral component of membrane|mitochondrial coenzyme A transmembrane transport
LOC103400791	9.74568	13.135	11.2025	8.94677	6.69751	8.7958	PCMP-H66	pentatricopeptide repeat-containing protein At2g15690, mitochondrial-like
LOC103400792	48.6483	27.7722	57.6781	9.09377	14.36	1.36867	ACO1	1-aminocyclopropane-1-carboxylate oxidase 1	GO:0006952,GO:0009693,GO:0009815,GO:0031418,GO:0046872,GO:0051213,GO:0051365,GO:0071281,GO:0071398,GO:0071732	defense response|ethylene biosynthetic process|1-aminocyclopropane-1-carboxylate oxidase activity|L-ascorbic acid binding|metal ion binding|dioxygenase activity|cellular response to potassium ion starvation|cellular response to iron ion|cellular response to fatty acid|cellular response to nitric oxide	path:mdm00270	Cysteine and methionine metabolism
LOC103400793	3.64206	4.61555	4.32509	3.96202	3.90262	4.14233	KEA4	K(+) efflux antiporter 4	GO:0006813,GO:0015299,GO:0016021	potassium ion transport|solute:proton antiporter activity|integral component of membrane
LOC103400794	0	0.064352	0	0.275432	0.250886	0.0350463	KUA1	transcription factor MYBS3-like	GO:0000122,GO:0000976,GO:0003700,GO:0005634,GO:0006355,GO:0008270,GO:0009646,GO:0009651,GO:0009723,GO:0009733,GO:0009737,GO:0009739,GO:0009744,GO:0009751,GO:0009753,GO:0010150,GO:0010252,GO:0030307,GO:0045892,GO:0046686,GO:0048366,GO:0048527,GO:0090697,GO:2000469	negative regulation of transcription by RNA polymerase II|transcription regulatory region sequence-specific DNA binding|DNA-binding transcription factor activity|nucleus|regulation of transcription, DNA-templated|zinc ion binding|response to absence of light|response to salt stress|response to ethylene|response to auxin|response to abscisic acid|response to gibberellin|response to sucrose|respons…
LOC103400795	0.669387	0.790506	0.651574	0.474672	0.629685	0.415289	LPXA	probable acyl-[acyl-carrier-protein]--UDP-N-acetylglucosamine O-acyltransferase, mitochondrial	GO:0005739,GO:0008780,GO:0009245,GO:2001289	mitochondrion|acyl-[acyl-carrier-protein]-UDP-N-acetylglucosamine O-acyltransferase activity|lipid A biosynthetic process|lipid X metabolic process
LOC103400796	0.401192	0.607139	0.33444	0.870108	2.62979	0.329711	SELMODRAFT_444075	inactive protein kinase SELMODRAFT_444075-like	GO:0004672,GO:0005524	protein kinase activity|ATP binding
LOC103400798	38.868	42.0266	44.2068	56.6846	56.7367	85.8283	TET2	tetraspanin-2	GO:0005886,GO:0009506,GO:0016021	plasma membrane|plasmodesma|integral component of membrane
LOC103400799	11.282	10.0964	11.4137	4.41568	4.56308	4.4404		uncharacterized LOC103400799
LOC103400800	0.778046	0.969464	0.846747	0.660434	0.619677	0.152921	CDA1	cytidine deaminase 1	GO:0004126,GO:0005829,GO:0006216,GO:0008270,GO:0009972,GO:0042803,GO:0047844	cytidine deaminase activity|cytosol|cytidine catabolic process|zinc ion binding|cytidine deamination|protein homodimerization activity|deoxycytidine deaminase activity	path:mdm00240	Pyrimidine metabolism
LOC103400802	11.2292	15.3528	13.3768	6.41249	5.50079	5.94382	Os05g0200100	thioredoxin-like 2, chloroplastic	GO:0009507,GO:0045454,GO:0055114	chloroplast|cell redox homeostasis|oxidation-reduction process
LOC103400803	0	0.101557	0	0	0	0.330838	PRA1F2	PRA1 family protein F2-like	GO:0005774,GO:0005783,GO:0005794,GO:0010008,GO:0016021,GO:0016192	vacuolar membrane|endoplasmic reticulum|Golgi apparatus|endosome membrane|integral component of membrane|vesicle-mediated transport
LOC103400804	19.4047	15.4265	16.5185	23.7209	31.13	21.8811	EMB2752	uncharacterized protein At4g29660	GO:0016021	integral component of membrane
LOC103400808	17.8656	16.9648	18.6926	15.9936	13.0681	12.8821	rrb1	glutamate-rich WD repeat-containing protein 1	GO:0005634,GO:0005730,GO:0005829,GO:0006364,GO:0042254	nucleus|nucleolus|cytosol|rRNA processing|ribosome biogenesis
LOC103400809	0.130848	0.072417	0.0210289	0.0388928	0.0351835	0.0394117		uncharacterized LOC103400809
LOC103400813	15.7217	13.6184	16.5796	10.1969	7.94318	10.5872	MSI4	WD-40 repeat-containing protein MSI4-like	GO:0005634,GO:0005730,GO:0005737,GO:0005829,GO:0006281,GO:0006325,GO:0009908,GO:0010224,GO:0030154,GO:0046872,GO:0080008	nucleus|nucleolus|cytoplasm|cytosol|DNA repair|chromatin organization|flower development|response to UV-B|cell differentiation|metal ion binding|Cul4-RING E3 ubiquitin ligase complex
LOC103400814	9.58452	8.99285	7.83493	8.04808	8.27922	8.87513	FLXL4	protein FLX-like 4	GO:0009908,GO:0030154	flower development|cell differentiation
LOC103400817	5.94837	6.17656	6.18734	5.75135	5.04832	6.39479	At2g19490	DNA repair protein recA homolog 3, mitochondrial	GO:0003697,GO:0005524,GO:0005739,GO:0006281,GO:0006310,GO:0008094	single-stranded DNA binding|ATP binding|mitochondrion|DNA repair|DNA recombination|DNA-dependent ATPase activity	path:mdm03440	Homologous recombination
LOC103400818	77.3236	77.3241	81.5913	85.3387	80.0133	71.6548	NAP1	nucleosome assembly protein 1;2	GO:0005634,GO:0005737,GO:0006334	nucleus|cytoplasm|nucleosome assembly
LOC103400819	15.2183	12.8228	15.2899	12.7589	15.4055	12.5968	RPS16-2	30S ribosomal protein S16-2, chloroplastic/mitochondrial	GO:0003735,GO:0005739,GO:0005840,GO:0006412,GO:0009507,GO:0009536	structural constituent of ribosome|mitochondrion|ribosome|translation|chloroplast|plastid	path:mdm03010	Ribosome
LOC103400820	1.97109	1.89166	1.62809	1.60129	1.3579	2.13436	EMB1789	uncharacterized LOC103400820	GO:0001162,GO:0003700,GO:0003723,GO:0004518,GO:0005634,GO:0045892,GO:0046872	RNA polymerase II intronic transcription regulatory region sequence-specific DNA binding|DNA-binding transcription factor activity|RNA binding|nuclease activity|nucleus|negative regulation of transcription, DNA-templated|metal ion binding
LOC103400821	0	0	0	0	0	0	IQM4	IQ domain-containing protein IQM1-like	GO:0005634,GO:0005737	nucleus|cytoplasm
LOC103400822	0	3.40931e-12	0.0361902	0	3.36365e-12	3.88835e-10	YNR064C	epoxide hydrolase A-like	GO:0004301,GO:0009636,GO:0052689	epoxide hydrolase activity|response to toxic substance|carboxylic ester hydrolase activity
LOC103400825	2.28969	2.69114	3.65464	4.1305	5.24685	4.49928	DGAT1	diacylglycerol O-acyltransferase 1A	GO:0004144,GO:0005789,GO:0006071,GO:0016021,GO:0019432	diacylglycerol O-acyltransferase activity|endoplasmic reticulum membrane|glycerol metabolic process|integral component of membrane|triglyceride biosynthetic process	path:mdm00561	Glycerolipid metabolism
LOC103400826	3.22524	3.52402	3.18628	0.794578	0.771525	0.859711	THO6	THO complex subunit 6	GO:0000347,GO:0003723,GO:0005634,GO:0006397,GO:0008380,GO:0009738,GO:0009788,GO:0010267,GO:0016567,GO:0031047,GO:0051028,GO:0080008	THO complex|RNA binding|nucleus|mRNA processing|RNA splicing|abscisic acid-activated signaling pathway|negative regulation of abscisic acid-activated signaling pathway|production of ta-siRNAs involved in RNA interference|protein ubiquitination|gene silencing by RNA|mRNA transport|Cul4-RING E3 ubiquitin ligase complex	path:mdm03013	RNA transport
LOC103400827	101.662	125.054	121.523	66.5229	62.8632	72.132		eukaryotic initiation factor 4A-11	GO:0003743,GO:0004386,GO:0005524	translation initiation factor activity|helicase activity|ATP binding	path:mdm03013	RNA transport
LOC103400828	32.7113	40.3149	37.9343	43.3917	44.6079	40.8103	NMT1	glycylpeptide N-tetradecanoyltransferase 1	GO:0004379,GO:0005737,GO:0005829,GO:0005840,GO:0006499,GO:0010064,GO:0018008,GO:0019107	glycylpeptide N-tetradecanoyltransferase activity|cytoplasm|cytosol|ribosome|N-terminal protein myristoylation|embryonic shoot morphogenesis|N-terminal peptidyl-glycine N-myristoylation|myristoyltransferase activity
LOC103400830	0.421391	0.354505	0.528825	0.380334	0.836033	0.385357		uncharacterized LOC103400830
LOC103400832	8.4792	6.55702	11.686	3.12759	2.82928	1.45484		uncharacterized LOC103400832
LOC103400833	30.2442	27.3126	27.7161	36.0499	38.0016	30.6299	PBG1	proteasome subunit beta type-4-like	GO:0000502,GO:0004175,GO:0004298,GO:0005634,GO:0005737,GO:0005829,GO:0005839,GO:0009651,GO:0010498,GO:0010499,GO:0019774,GO:0022626,GO:0043161,GO:0046686	proteasome complex|endopeptidase activity|threonine-type endopeptidase activity|nucleus|cytoplasm|cytosol|proteasome core complex|response to salt stress|proteasomal protein catabolic process|proteasomal ubiquitin-independent protein catabolic process|proteasome core complex, beta-subunit complex|cytosolic ribosome|proteasome-mediated ubiquitin-dependent protein catabolic process|response to cadm…	path:mdm03050	Proteasome
LOC103400835	3.51777	3.77104	3.56745	2.39396	2.51698	2.69543	CBK1	serine/threonine-protein kinase tricorner-like	GO:0000902,GO:0000920,GO:0001411,GO:0004674,GO:0005524,GO:0005935,GO:0005938,GO:0006357,GO:0007163,GO:0009267,GO:0018105,GO:0030428,GO:0030447,GO:0031505,GO:0031579,GO:0034605,GO:0035556,GO:0035690,GO:0036168,GO:0036170,GO:0036178,GO:0036180,GO:0036244,GO:0044011,GO:1900233,GO:1900433,GO:1900442	cell morphogenesis|septum digestion after cytokinesis|hyphal tip|protein serine/threonine kinase activity|ATP binding|cellular bud neck|cell cortex|regulation of transcription by RNA polymerase II|establishment or maintenance of cell polarity|cellular response to starvation|peptidyl-serine phosphorylation|cell septum|filamentous growth|fungal-type cell wall organization|membrane raft organization…
LOC103400836	3.38247	4.02664	3.99354	2.9905	3.14276	3.30265		uncharacterized LOC103400836
LOC103400837	50.5013	47.258	47.8451	36.7263	46.4697	41.547	MKK2	mitogen-activated protein kinase kinase 2-like	GO:0000187,GO:0004674,GO:0004708,GO:0005524,GO:0005737,GO:0005886,GO:0009409,GO:0009631,GO:0009651,GO:0009814,GO:0010051,GO:0023014,GO:0031098,GO:0032147,GO:0060918	activation of MAPK activity|protein serine/threonine kinase activity|MAP kinase kinase activity|ATP binding|cytoplasm|plasma membrane|response to cold|cold acclimation|response to salt stress|defense response, incompatible interaction|xylem and phloem pattern formation|signal transduction by protein phosphorylation|stress-activated protein kinase signaling cascade|activation of protein kinase act…	path:mdm04016	MAPK signaling pathway - plant
LOC103400838	3.30218	0.611865	1.50989	0.863554	0.594027	0.457143	PP2C06	protein phosphatase 2C 77	GO:0004722,GO:0005634,GO:0005829,GO:0009738,GO:0046872	protein serine/threonine phosphatase activity|nucleus|cytosol|abscisic acid-activated signaling pathway|metal ion binding	path:mdm04016,path:mdm04075	MAPK signaling pathway - plant|Plant hormone signal transduction
LOC103400839	10.5883	10.6663	10.9112	8.56497	7.81606	7.63786	VIP3	WD repeat-containing protein VIP3-like	GO:0005634,GO:0005829,GO:0009908,GO:0009910,GO:0010452,GO:0016441,GO:0016593,GO:0051568,GO:0080008	nucleus|cytosol|flower development|negative regulation of flower development|histone H3-K36 methylation|posttranscriptional gene silencing|Cdc73/Paf1 complex|histone H3-K4 methylation|Cul4-RING E3 ubiquitin ligase complex	path:mdm03018	RNA degradation
LOC103400840	4.31536	3.47743	5.03117	0.139079	0.0553412	0.103758		SH3 and multiple ankyrin repeat domains protein 1
LOC103400841	0.877106	0.63445	0.416603	0.56239	0.322316	0.573366	UBA1C	UBP1-associated proteins 1C-like	GO:0003723,GO:0005634,GO:0008270,GO:1990904	RNA binding|nucleus|zinc ion binding|ribonucleoprotein complex
LOC103400842	49.4858	52.5466	54.8581	52.6346	56.6467	49.9475	UBC18	probable ubiquitin-conjugating enzyme E2 18	GO:0005524,GO:0005634,GO:0043161,GO:0061631	ATP binding|nucleus|proteasome-mediated ubiquitin-dependent protein catabolic process|ubiquitin conjugating enzyme activity	path:mdm04120	Ubiquitin mediated proteolysis
LOC103400844	0.605747	0.31546	0.183104	1.15465	0.854734	1.34703	NFYA3	nuclear transcription factor Y subunit A-4-like	GO:0003677,GO:0003700,GO:0016602	DNA binding|DNA-binding transcription factor activity|CCAAT-binding factor complex
LOC103400845	30.3071	31.6909	33.5686	35.9146	44.4314	38.0189	WAV2	alpha/beta hydrolase domain-containing protein WAV2-like	GO:0005783,GO:0005886,GO:0008236,GO:0016021,GO:0019866,GO:0048364	endoplasmic reticulum|plasma membrane|serine-type peptidase activity|integral component of membrane|organelle inner membrane|root development
LOC103400846	0.0386311	0.0936297	0.174978	0.548125	0.404191	0.327678		ankyrin repeat-containing protein BDA1-like
LOC103400847	4.57265	4.82704	5.31694	5.60272	3.42133	4.61716	PMIR1	protein PLASTID MOVEMENT IMPAIRED 1-RELATED 1-like	GO:0005737,GO:0009637,GO:0009902,GO:0009903,GO:0030048,GO:0031022	cytoplasm|response to blue light|chloroplast relocation|chloroplast avoidance movement|actin filament-based movement|nuclear migration along microfilament
LOC103400852	0.789768	0.44377	0.785071	0.0410041	0.132842	0.127624	BRXL4	protein Brevis radix-like 4	GO:0005634	nucleus
LOC103400853	4.99385	5.9653	4.49342	4.05268	4.90825	4.4891	PDAT1	phospholipid:diacylglycerol acyltransferase 1-like	GO:0005773,GO:0005783,GO:0006071,GO:0008374,GO:0016021,GO:0019432,GO:0046027	vacuole|endoplasmic reticulum|glycerol metabolic process|O-acyltransferase activity|integral component of membrane|triglyceride biosynthetic process|phospholipid:diacylglycerol acyltransferase activity	path:mdm00561	Glycerolipid metabolism
LOC103400854	87.3455	81.2794	81.1877	72.7609	98.0227	85.7941	VPS2.1	vacuolar protein sorting-associated protein 2 homolog 1	GO:0000815,GO:0000920,GO:0005770,GO:0005771,GO:0015031,GO:0032509,GO:0045324,GO:0070676	ESCRT III complex|septum digestion after cytokinesis|late endosome|multivesicular body|protein transport|endosome transport via multivesicular body sorting pathway|late endosome to vacuole transport|intralumenal vesicle formation	path:mdm04144	Endocytosis
LOC103400855	3.91566	3.77548	3.98235	0.829011	0.540123	0.362449	EL5.1	RING-H2 finger protein ATL33-like	GO:0004842,GO:0005886,GO:0006511,GO:0016021,GO:0016567,GO:0046872,GO:0048364,GO:0051301,GO:0061630	ubiquitin-protein transferase activity|plasma membrane|ubiquitin-dependent protein catabolic process|integral component of membrane|protein ubiquitination|metal ion binding|root development|cell division|ubiquitin protein ligase activity
LOC103400858	1.80636	1.89869	1.6119	2.54065	2.69352	2.41456	RPA1A	replication protein A 70 kDa DNA-binding subunit A	GO:0000723,GO:0000724,GO:0000784,GO:0000790,GO:0003684,GO:0003697,GO:0005662,GO:0006261,GO:0006268,GO:0006281,GO:0006289,GO:0007004,GO:0007131,GO:0007141,GO:0009555,GO:0043047,GO:0043565,GO:0046872,GO:0048232,GO:0051026,GO:0051321	telomere maintenance|double-strand break repair via homologous recombination|nuclear chromosome, telomeric region|nuclear chromatin|damaged DNA binding|single-stranded DNA binding|DNA replication factor A complex|DNA-dependent DNA replication|DNA unwinding involved in DNA replication|DNA repair|nucleotide-excision repair|telomere maintenance via telomerase|reciprocal meiotic recombination|male me…	path:mdm03030,path:mdm03420,path:mdm03430,path:mdm03440	DNA replication|Nucleotide excision repair|Mismatch repair|Homologous recombination
LOC103400859	34.6826	33.4562	34.0775	24.6471	28.987	23.3783	RPS3C	40S ribosomal protein S3-3-like	GO:0003684,GO:0003723,GO:0003735,GO:0003906,GO:0005634,GO:0005730,GO:0005829,GO:0006281,GO:0006412,GO:0008534,GO:0009506,GO:0009651,GO:0016020,GO:0022626,GO:0022627,GO:0032357,GO:0045739	damaged DNA binding|RNA binding|structural constituent of ribosome|DNA-(apurinic or apyrimidinic site) endonuclease activity|nucleus|nucleolus|cytosol|DNA repair|translation|oxidized purine nucleobase lesion DNA N-glycosylase activity|plasmodesma|response to salt stress|membrane|cytosolic ribosome|cytosolic small ribosomal subunit|oxidized purine DNA binding|positive regulation of DNA repair	path:mdm03010	Ribosome
LOC103400861	10.4248	8.96764	8.56781	5.88048	6.06527	5.16613	EFL4	protein ELF4-LIKE 3	GO:0005634,GO:0009648,GO:0009649,GO:0042753,GO:0042803,GO:0048511	nucleus|photoperiodism|entrainment of circadian clock|positive regulation of circadian rhythm|protein homodimerization activity|rhythmic process
LOC103400862	0.402887	0.259431	0.225928	0.173788	0.220719	0		uncharacterized LOC103400862
LOC103400864	5.8915	7.0342	7.37509	5.31259	5.96074	6.55303	ALE2	receptor-like serine/threonine-protein kinase ALE2
LOC103400865	0.392729	0.409621	0.285271	0.351781	0.266771	0.449112	DIM1B	ribosomal RNA small subunit methyltransferase, mitochondrial	GO:0000179,GO:0003723,GO:0005739,GO:0031167,GO:0046085	rRNA (adenine-N6,N6-)-dimethyltransferase activity|RNA binding|mitochondrion|rRNA methylation|adenosine metabolic process
LOC103400869	0.158215	0.12179	0	0.0328598	0	0	At3g47200	UPF0481 protein At3g47200-like	GO:0005886,GO:0016021	plasma membrane|integral component of membrane
LOC103400870	0	0	0	0	0	0	BHLH41	putative transcription factor bHLH041	GO:0003677,GO:0003700,GO:0005634,GO:0006355,GO:0010200,GO:0046983	DNA binding|DNA-binding transcription factor activity|nucleus|regulation of transcription, DNA-templated|response to chitin|protein dimerization activity
LOC103400872	0	0	0	0	0	0		uncharacterized LOC103400872
LOC103400874	1.27441	0.462268	0.603493	1.89277	0.297988	0.958658	CYP90C1	3-epi-6-deoxocathasterone 23-monooxygenase CYP90C1	GO:0004497,GO:0005506,GO:0005789,GO:0007275,GO:0009965,GO:0010268,GO:0016021,GO:0016125,GO:0016132,GO:0016709,GO:0020037,GO:0042814,GO:0048366,GO:0048441,GO:0048443,GO:0055114	monooxygenase activity|iron ion binding|endoplasmic reticulum membrane|multicellular organism development|leaf morphogenesis|brassinosteroid homeostasis|integral component of membrane|sterol metabolic process|brassinosteroid biosynthetic process|oxidoreductase activity, acting on paired donors, with incorporation or reduction of molecular oxygen, NAD(P)H as one donor, and incorporation of one ato…	path:mdm00905	Brassinosteroid biosynthesis
LOC103400876	0	0	0	0	0	0	TY3B-G	uncharacterized LOC103400876	GO:0000943,GO:0003677,GO:0003723,GO:0003887,GO:0003964,GO:0004190,GO:0004523,GO:0004540,GO:0005524,GO:0005634,GO:0005737,GO:0006310,GO:0008233,GO:0008270,GO:0015074,GO:0032197	retrotransposon nucleocapsid|DNA binding|RNA binding|DNA-directed DNA polymerase activity|RNA-directed DNA polymerase activity|aspartic-type endopeptidase activity|RNA-DNA hybrid ribonuclease activity|ribonuclease activity|ATP binding|nucleus|cytoplasm|DNA recombination|peptidase activity|zinc ion binding|DNA integration|transposition, RNA-mediated
LOC103400879	38.9743	22.8587	24.9957	27.6713	21.4228	17.1373	CFIS1	pre-mRNA cleavage factor Im 25 kDa subunit 1	GO:0003729,GO:0005849,GO:0006378,GO:0006397,GO:0016787,GO:0017091,GO:0046872	mRNA binding|mRNA cleavage factor complex|mRNA polyadenylation|mRNA processing|hydrolase activity|AU-rich element binding|metal ion binding	path:mdm03015	mRNA surveillance pathway
LOC103400881	0	0	0	0	0	0	AL5	PHD finger protein ALFIN-LIKE 5-like	GO:0003677,GO:0003714,GO:0005634,GO:0006325,GO:0006355,GO:0009414,GO:0009651,GO:0042393,GO:0046872	DNA binding|transcription corepressor activity|nucleus|chromatin organization|regulation of transcription, DNA-templated|response to water deprivation|response to salt stress|histone binding|metal ion binding
LOC103400883	3.93084	3.64251	5.10921	4.93368	5.42114	3.3883	RTH	protein RTE1-HOMOLOG-like	GO:0016021	integral component of membrane
LOC103400884	0	0	0	0	0	0	At5g41720	putative F-box protein At2g16220
LOC103400885	0	0	0	0	0	0	MSL10	mechanosensitive ion channel protein 10-like	GO:0005886,GO:0006820,GO:0008381,GO:0010150,GO:0016021,GO:0050982,GO:0097468	plasma membrane|anion transport|mechanosensitive ion channel activity|leaf senescence|integral component of membrane|detection of mechanical stimulus|programmed cell death in response to reactive oxygen species
LOC103400886	0.0427771	0	0.0161166	0.0298255	0.0135544	0.0606437	MSL10	mechanosensitive ion channel protein 10-like	GO:0005886,GO:0006820,GO:0008381,GO:0010150,GO:0016021,GO:0050982,GO:0097468	plasma membrane|anion transport|mechanosensitive ion channel activity|leaf senescence|integral component of membrane|detection of mechanical stimulus|programmed cell death in response to reactive oxygen species
LOC103400887	28.7071	33.2833	22.3493	5.21968	22.5984	9.86892		pectinesterase/pectinesterase inhibitor PPE8B	GO:0004857,GO:0005576,GO:0005618,GO:0030599,GO:0042545,GO:0045330,GO:0045490	enzyme inhibitor activity|extracellular region|cell wall|pectinesterase activity|cell wall modification|aspartyl esterase activity|pectin catabolic process	path:mdm00040	Pentose and glucuronate interconversions
LOC103400888	0	0.0220823	0	0	0	0	PME12	probable pectinesterase/pectinesterase inhibitor 12	GO:0005576,GO:0005618,GO:0009617,GO:0030599,GO:0042545,GO:0045330,GO:0045490,GO:0046910	extracellular region|cell wall|response to bacterium|pectinesterase activity|cell wall modification|aspartyl esterase activity|pectin catabolic process|pectinesterase inhibitor activity
LOC103400889	0	0	0	0	0	0	PME45	probable pectinesterase/pectinesterase inhibitor 13	GO:0005618,GO:0016021,GO:0030599,GO:0042545,GO:0045330,GO:0045490,GO:0046910	cell wall|integral component of membrane|pectinesterase activity|cell wall modification|aspartyl esterase activity|pectin catabolic process|pectinesterase inhibitor activity
LOC103400890	3.61896	4.23733	4.85382	2.94495	3.85609	2.64539	RAD51	DNA repair protein RAD51 homolog	GO:0000150,GO:0000730,GO:0000794,GO:0003690,GO:0003697,GO:0005524,GO:0006312,GO:0007131,GO:0008094,GO:0042148,GO:0070192,GO:1990426	recombinase activity|DNA recombinase assembly|condensed nuclear chromosome|double-stranded DNA binding|single-stranded DNA binding|ATP binding|mitotic recombination|reciprocal meiotic recombination|DNA-dependent ATPase activity|strand invasion|chromosome organization involved in meiotic cell cycle|mitotic recombination-dependent replication fork processing	path:mdm03440	Homologous recombination
LOC103400891	19.7824	23.0969	22.3573	11.7828	13.6574	13.0466	COG3	conserved oligomeric Golgi complex subunit 3	GO:0000139,GO:0000301,GO:0005801,GO:0006886,GO:0006888,GO:0006891,GO:0007030,GO:0008565,GO:0016236,GO:0017119,GO:0030242,GO:0032258	Golgi membrane|retrograde transport, vesicle recycling within Golgi|cis-Golgi network|intracellular protein transport|ER to Golgi vesicle-mediated transport|intra-Golgi vesicle-mediated transport|Golgi organization|protein transporter activity|macroautophagy|Golgi transport complex|autophagy of peroxisome|protein localization by the Cvt pathway
LOC103400892	2.81543	2.65821	2.46197	3.00074	2.33923	3.29433	FAB1B	1-phosphatidylinositol-3-phosphate 5-kinase FAB1A-like	GO:0000285,GO:0005524,GO:0005739,GO:0005768,GO:0007033,GO:0009555,GO:0010008,GO:0010256,GO:0046854,GO:0046872,GO:0090332	1-phosphatidylinositol-3-phosphate 5-kinase activity|ATP binding|mitochondrion|endosome|vacuole organization|pollen development|endosome membrane|endomembrane system organization|phosphatidylinositol phosphorylation|metal ion binding|stomatal closure	path:mdm00562,path:mdm04070,path:mdm04145	Inositol phosphate metabolism|Phosphatidylinositol signaling system|Phagosome
LOC103400893	0	0	0	0	0.122342	0	SDR1	(+)-neomenthol dehydrogenase-like	GO:0005737,GO:0006952,GO:0047501,GO:0055114	cytoplasm|defense response|(+)-neomenthol dehydrogenase activity|oxidation-reduction process	path:mdm00902	Monoterpenoid biosynthesis
LOC103400894	8.77563	8.04166	8.45462	7.39874	6.28913	7.37991	SMU2	suppressor of mec-8 and unc-52 protein homolog 2-like	GO:0005634,GO:0008380	nucleus|RNA splicing
LOC103400895	17.9291	18.9287	19.9631	17.8606	18.4479	19.5548	SPAPJ696.02	uncharacterized LOC103400895	GO:0006897,GO:0007015,GO:0030479,GO:0032587,GO:0035091,GO:0051015,GO:0051017,GO:0051666,GO:1900027	endocytosis|actin filament organization|actin cortical patch|ruffle membrane|phosphatidylinositol binding|actin filament binding|actin filament bundle assembly|actin cortical patch localization|regulation of ruffle assembly
LOC103400896	0.0363053	0	0.0815853	0	0	0	At5g10370	ATP-dependent RNA helicase DEAH12, chloroplastic-like	GO:0000398,GO:0003723,GO:0005524,GO:0009507,GO:0034459,GO:0046872	mRNA splicing, via spliceosome|RNA binding|ATP binding|chloroplast|ATP-dependent 3'-5' RNA helicase activity|metal ion binding
LOC103400897	29.9497	27.5662	26.9619	24.0031	25.9282	23.1923	At5g10370	probable E3 ubiquitin-protein ligase RNF217	GO:0000398,GO:0003723,GO:0005524,GO:0009507,GO:0034459,GO:0046872	mRNA splicing, via spliceosome|RNA binding|ATP binding|chloroplast|ATP-dependent 3'-5' RNA helicase activity|metal ion binding
LOC103400898	14.9778	17.9109	18.1396	15.7778	15.9489	14.4627	SAC3	phosphoinositide phosphatase SAC3	GO:0005774,GO:0007033,GO:0036092,GO:0042578	vacuolar membrane|vacuole organization|phosphatidylinositol-3-phosphate biosynthetic process|phosphoric ester hydrolase activity	path:mdm00562	Inositol phosphate metabolism
LOC103400899	73.2613	69.3174	76.5312	66.2967	78.16	59.2889	TIF3K1	eukaryotic translation initiation factor 3 subunit K-like	GO:0001732,GO:0003743,GO:0005829,GO:0005852,GO:0006446,GO:0016282,GO:0033290,GO:0043022	formation of cytoplasmic translation initiation complex|translation initiation factor activity|cytosol|eukaryotic translation initiation factor 3 complex|regulation of translational initiation|eukaryotic 43S preinitiation complex|eukaryotic 48S preinitiation complex|ribosome binding
LOC103400900	0.180464	0.162717	0.148668	0.0125436	0.0113275	0.0127095	NACK2	kinesin-like protein KIN-7B	GO:0000919,GO:0003777,GO:0005524,GO:0005634,GO:0005874,GO:0007018,GO:0008017,GO:0009524	cell plate assembly|microtubule motor activity|ATP binding|nucleus|microtubule|microtubule-based movement|microtubule binding|phragmoplast
LOC103400901	11.7762	9.32003	9.49652	6.79452	1.77658	3.6762	SUCS	sucrose synthase	GO:0005985,GO:0016157	sucrose metabolic process|sucrose synthase activity	path:mdm00500	Starch and sucrose metabolism
LOC103400902	5.42277	7.50785	6.41581	7.92491	10.1419	8.81478	ARG7	uncharacterized LOC103400902	GO:0009733	response to auxin	path:mdm04075	Plant hormone signal transduction
LOC103400903	0.66243	0.197616	0.114253	0.204916	0	0	PRXQ	peroxiredoxin Q, chloroplastic	GO:0004601,GO:0009543,GO:0045454,GO:0051920	peroxidase activity|chloroplast thylakoid lumen|cell redox homeostasis|peroxiredoxin activity
LOC103400905	0	0.035645	0	0	0	0	RBOHE	respiratory burst oxidase homolog protein E	GO:0004601,GO:0005509,GO:0016021,GO:0050664	peroxidase activity|calcium ion binding|integral component of membrane|oxidoreductase activity, acting on NAD(P)H, oxygen as acceptor	path:mdm04016,path:mdm04626	MAPK signaling pathway - plant|Plant-pathogen interaction
LOC103400906	8.40429	9.10377	8.29793	4.54858	9.61071	6.02333		uncharacterized LOC103400906
LOC103400907	0.727982	2.04831	4.35471	1.29363	1.83788	0.452192		uncharacterized LOC103400907
LOC103400908	7.01022	7.04529	7.24037	5.57507	6.07172	6.74971		uncharacterized LOC103400908
LOC103400909	40.3191	36.845	44.2876	19.921	14.5618	18.8959	KAS2	3-oxoacyl-[acyl-carrier-protein] synthase II, chloroplastic-like	GO:0004315,GO:0006633,GO:0006636,GO:0009507,GO:0009536,GO:0009570,GO:0009631,GO:0009793	3-oxoacyl-[acyl-carrier-protein] synthase activity|fatty acid biosynthetic process|unsaturated fatty acid biosynthetic process|chloroplast|plastid|chloroplast stroma|cold acclimation|embryo development ending in seed dormancy	path:mdm00061,path:mdm00780	Fatty acid biosynthesis|Biotin metabolism
LOC103400910	4.6805	4.68919	4.43129	3.98578	3.65948	4.82364	RRP12	RRP12-like protein	GO:0000462,GO:0003723,GO:0005634,GO:0005730,GO:0005840,GO:0030688,GO:0042254	maturation of SSU-rRNA from tricistronic rRNA transcript (SSU-rRNA, 5.8S rRNA, LSU-rRNA)|RNA binding|nucleus|nucleolus|ribosome|preribosome, small subunit precursor|ribosome biogenesis
LOC103400911	1519.95	1639.92	1712.68	607.101	458.677	509.524	PMEI3	pectinesterase inhibitor 3-like	GO:0004857,GO:0043086,GO:0048046,GO:1902183	enzyme inhibitor activity|negative regulation of catalytic activity|apoplast|regulation of shoot apical meristem development
LOC103400912	1.99077	1.3936	1.29482	1.97036	1.13876	2.32769	ARF19	auxin response factor 19-like	GO:0003677,GO:0003700,GO:0005634,GO:0009723,GO:0009733,GO:0009734,GO:0010311,GO:0043565,GO:0046983,GO:0048366,GO:0048527	DNA binding|DNA-binding transcription factor activity|nucleus|response to ethylene|response to auxin|auxin-activated signaling pathway|lateral root formation|sequence-specific DNA binding|protein dimerization activity|leaf development|lateral root development
LOC103400913	181.999	119.901	143.168	95.9994	92.4832	89.6859	CPN20	20 kDa chaperonin, chloroplastic-like	GO:0005507,GO:0005524,GO:0005739,GO:0005759,GO:0009409,GO:0009507,GO:0009535,GO:0009536,GO:0009570,GO:0009579,GO:0009788,GO:0009941,GO:0046686,GO:0046872,GO:0048046,GO:0051082,GO:0051085,GO:0051087,GO:0051290,GO:1901671	copper ion binding|ATP binding|mitochondrion|mitochondrial matrix|response to cold|chloroplast|chloroplast thylakoid membrane|plastid|chloroplast stroma|thylakoid|negative regulation of abscisic acid-activated signaling pathway|chloroplast envelope|response to cadmium ion|metal ion binding|apoplast|unfolded protein binding|chaperone cofactor-dependent protein refolding|chaperone binding|protein h…
LOC103400914	0	0.0352712	0	0	0	0	ERF017	ethylene-responsive transcription factor ERF017	GO:0003677,GO:0003700,GO:0005634,GO:0009873	DNA binding|DNA-binding transcription factor activity|nucleus|ethylene-activated signaling pathway
LOC103400916	0.0962997	0.0622443	0.0725303	0.0672418	0.122144	0.341568	TIFY10A	protein TIFY 10A-like	GO:0005634,GO:0009555,GO:0009611,GO:0009753,GO:0009867,GO:0009908,GO:0031347,GO:0042742,GO:1900067,GO:2000022	nucleus|pollen development|response to wounding|response to jasmonic acid|jasmonic acid mediated signaling pathway|flower development|regulation of defense response|defense response to bacterium|regulation of cellular response to alkaline pH|regulation of jasmonic acid mediated signaling pathway	path:mdm04075	Plant hormone signal transduction
LOC103400917	26.8168	24.6634	21.7009	17.6398	18.3885	18.9045	UBP1	oligouridylate-binding protein 1	GO:0003723,GO:0005634,GO:0006397	RNA binding|nucleus|mRNA processing
LOC103400918	44.6096	16.8238	21.8766	2.1566	5.28123	6.49469	FLZ14	FCS-Like Zinc finger 13-like	GO:0005634,GO:0005737,GO:0009744,GO:0009749,GO:0042594,GO:0046872,GO:1905582	nucleus|cytoplasm|response to sucrose|response to glucose|response to starvation|metal ion binding|response to mannose
LOC103400919	9.72465	7.83562	7.40311	6.23256	5.90359	5.49187	LSM1B	sm-like protein LSM1B	GO:0000290,GO:0000339,GO:0000932,GO:0003723,GO:0005845,GO:0006397,GO:0009414,GO:0009631,GO:0016070,GO:0042538,GO:1990726	deadenylation-dependent decapping of nuclear-transcribed mRNA|RNA cap binding|P-body|RNA binding|mRNA cap binding complex|mRNA processing|response to water deprivation|cold acclimation|RNA metabolic process|hyperosmotic salinity response|Lsm1-7-Pat1 complex	path:mdm03018	RNA degradation
LOC103400920	18.4336	20.2544	21.9299	19.8644	20.286	18.898	GSVIVT00026920001	probable polygalacturonase	GO:0004650,GO:0005975,GO:0016021	polygalacturonase activity|carbohydrate metabolic process|integral component of membrane
LOC103400921	0	0	0	0	0	0	PRK3	pollen receptor-like kinase 3	GO:0004674,GO:0005524,GO:0009506,GO:0016021,GO:0080092	protein serine/threonine kinase activity|ATP binding|plasmodesma|integral component of membrane|regulation of pollen tube growth
LOC103400923	4.02602	1.76126	1.21092	0.704892	1.77473	1.31072		uncharacterized LOC103400923
LOC103400925	0	0.012147	0.028271	0	0	0.0132775	BGAL3	beta-galactosidase 3	GO:0004565,GO:0005618,GO:0005773,GO:0005975,GO:0009505,GO:0030246,GO:0048046	beta-galactosidase activity|cell wall|vacuole|carbohydrate metabolic process|plant-type cell wall|carbohydrate binding|apoplast
LOC103400926	2.71611	2.11814	4.15433	8.62956	18.1639	11.5189	RD22	BURP domain protein RD22-like	GO:0005768,GO:0005794,GO:0005802,GO:0009651	endosome|Golgi apparatus|trans-Golgi network|response to salt stress
LOC103400927	50.4523	45.5592	54.061	53.8034	61.7105	54.9091	RCOM_0711420	methylthioribose-1-phosphate isomerase-like	GO:0005634,GO:0005737,GO:0019284,GO:0019509,GO:0046523	nucleus|cytoplasm|L-methionine salvage from S-adenosylmethionine|L-methionine salvage from methylthioadenosine|S-methyl-5-thioribose-1-phosphate isomerase activity	path:mdm00270	Cysteine and methionine metabolism
LOC103400928	4.88345	6.72766	4.82365	10.7436	8.77953	9.1555		inter-alpha-trypsin inhibitor heavy chain H3-like
LOC103400929	0	0	0.0413682	0	0	0	SBT1.8	subtilisin-like protease SBT1.8	GO:0004252,GO:0005576,GO:0005618,GO:0005794,GO:0009505,GO:0009506	serine-type endopeptidase activity|extracellular region|cell wall|Golgi apparatus|plant-type cell wall|plasmodesma
LOC103400930	0.0472869	0	0.052675	0	0	0	GG3	guanine nucleotide-binding protein subunit gamma 3	GO:0005886,GO:0007186,GO:0009737	plasma membrane|G protein-coupled receptor signaling pathway|response to abscisic acid
LOC103400931	0.11822	0.458206	0.177526	0.452932	0.480157	0.331446	At2g05910	protein LURP-one-related 6-like
LOC103400932	7.53269	8.76387	6.6394	6.52324	5.57113	4.99155		uncharacterized LOC103400932
LOC103400933	0.0740262	0.0361873	0.105481	0.0389119	0.0535218	0.040194	SHI	protein SHI RELATED SEQUENCE 1	GO:0003677,GO:0003700,GO:0005634,GO:0009555,GO:0009734,GO:0009739,GO:0009740,GO:0009851,GO:0009938,GO:0045893,GO:0046872,GO:0046982,GO:0048653	DNA binding|DNA-binding transcription factor activity|nucleus|pollen development|auxin-activated signaling pathway|response to gibberellin|gibberellic acid mediated signaling pathway|auxin biosynthetic process|negative regulation of gibberellic acid mediated signaling pathway|positive regulation of transcription, DNA-templated|metal ion binding|protein heterodimerization activity|anther developme…
LOC103400934	8.65811	4.98024	10.0639	10.5372	5.24121	6.88929	PBY1	tubulin--tyrosine ligase-like protein 12	GO:0000932,GO:0004835,GO:0006464,GO:0016787	P-body|tubulin-tyrosine ligase activity|cellular protein modification process|hydrolase activity
LOC103400935	8.17761	7.64023	9.61554	7.91447	11.1498	12.2637	FIP1	protein FIP1	GO:0016021	integral component of membrane
LOC103400936	3.50174	3.98881	4.02515	3.41534	3.09196	3.73424	At2g06000	pentatricopeptide repeat-containing protein At2g06000
LOC103400937	2013.99	1629.57	1634.67	4091.68	3799.39	3988.47	At3g45310	thiol protease aleurain-like	GO:0004197,GO:0005615,GO:0005764,GO:0051603	cysteine-type endopeptidase activity|extracellular space|lysosome|proteolysis involved in cellular protein catabolic process
LOC103400938	0.706707	0.556929	0.572267	0.182941	1.01936	0.490413	RIPK	serine/threonine-protein kinase RIPK
LOC103400940	0.462406	0.0893172	0.311867	0.62588	0.34632	0.77428		uncharacterized LOC103400940
LOC103400941	0	0	0	0.0549454	0	0		uncharacterized LOC103400941
LOC103400942	0	0	0.0339007	0	0	0	ALDH3F1	aldehyde dehydrogenase family 3 member F1	GO:0004028,GO:0004029,GO:0005783,GO:0006081,GO:0016020,GO:0043878	3-chloroallyl aldehyde dehydrogenase activity|aldehyde dehydrogenase (NAD) activity|endoplasmic reticulum|cellular aldehyde metabolic process|membrane|glyceraldehyde-3-phosphate dehydrogenase (NAD+) (non-phosphorylating) activity	path:mdm00010,path:mdm00053,path:mdm00071,path:mdm00280,path:mdm00310,path:mdm00330,path:mdm00340,path:mdm00380,path:mdm00410,path:mdm00561,path:mdm00620,path:mdm00903	Glycolysis / Gluconeogenesis|Ascorbate and aldarate metabolism|Fatty acid degradation|Valine, leucine and isoleucine degradation|Lysine degradation|Arginine and proline metabolism|Histidine metabolism|Tryptophan metabolism|beta-Alanine metabolism|Glycerolipid metabolism|Pyruvate metabolism|Limonene and pinene degradation
LOC103400943	1.62709	2.59685	1.69789	3.82661	4.1649	5.35129		uncharacterized LOC103400943
LOC103400944	0.186713	0.0673657	0.392891	0.0725541	0.0873739	0	NPR4	ankyrin repeat-containing protein NPR4-like	GO:0005886,GO:0016020,GO:0016021	plasma membrane|membrane|integral component of membrane
LOC103400946	3.82515	3.07172	3.13233	3.16243	2.25605	3.71511	rhp7	uncharacterized LOC103400946	GO:0000109,GO:0005634,GO:0006289,GO:0044732	nucleotide-excision repair complex|nucleus|nucleotide-excision repair|mitotic spindle pole body
LOC103400947	1.98249	2.01173	1.94009	1.44891	1.58023	1.45335	OFUT35	O-fucosyltransferase 35
LOC103400948	89.6521	158.619	131.942	83.2452	267.658	130.316	MOB1-A	MOB kinase activator-like 1A	GO:0005737,GO:0005856,GO:0009524,GO:0046872	cytoplasm|cytoskeleton|phragmoplast|metal ion binding
LOC103400949	0	0	0	0	0	0	ABP20	auxin-binding protein ABP20	GO:0005618,GO:0009734,GO:0030145,GO:0045735,GO:0048046	cell wall|auxin-activated signaling pathway|manganese ion binding|nutrient reservoir activity|apoplast
LOC103400950	7.7285	7.51788	8.83744	9.53407	14.7173	10.2829	GRXC3	uncharacterized LOC103400950	GO:0004362,GO:0005794,GO:0009055,GO:0015035,GO:0034599,GO:0045454	glutathione-disulfide reductase activity|Golgi apparatus|electron transfer activity|protein disulfide oxidoreductase activity|cellular response to oxidative stress|cell redox homeostasis
LOC103400951	0	0	0	0	0	0	ABP19A	auxin-binding protein ABP19a	GO:0005618,GO:0009734,GO:0030145,GO:0045735,GO:0048046	cell wall|auxin-activated signaling pathway|manganese ion binding|nutrient reservoir activity|apoplast
LOC103400952	26.4262	33.2043	30.813	19.0964	16.2918	17.0864	OPR3	12-oxophytodienoate reductase 3	GO:0005777,GO:0009620,GO:0009695,GO:0010181,GO:0010193,GO:0016629,GO:0031408,GO:0042802,GO:0048443	peroxisome|response to fungus|jasmonic acid biosynthetic process|FMN binding|response to ozone|12-oxophytodienoate reductase activity|oxylipin biosynthetic process|identical protein binding|stamen development	path:mdm00592	alpha-Linolenic acid metabolism
LOC103400953	0	0	0	0	0	0	C1	transcription factor MYB12	GO:0005634,GO:0030154,GO:0043565,GO:0044212	nucleus|cell differentiation|sequence-specific DNA binding|transcription regulatory region DNA binding
LOC103400954	0.046356	0.268501	0.0519279	0.671846	0.783801	0.486689		uncharacterized LOC103400954
LOC103400956	1.74776	1.70098	1.7189	1.04961	1.14893	1.29629	At5g14770	pentatricopeptide repeat-containing protein At5g14770, mitochondrial
LOC103400959	2.54831	2.17707	2.0952	1.94942	2.07494	2.50896	EMB8	uncharacterized LOC103400959	GO:0052689	carboxylic ester hydrolase activity
LOC103400961	0	0	0	0	0	0	FMO1	probable flavin-containing monooxygenase 1	GO:0004497,GO:0004499,GO:0009626,GO:0009627,GO:0009870,GO:0010204,GO:0031543,GO:0042742,GO:0050660,GO:0050661,GO:0050832,GO:0051707,GO:0062034,GO:0062047,GO:0071456	monooxygenase activity|N,N-dimethylaniline monooxygenase activity|plant-type hypersensitive response|systemic acquired resistance|defense response signaling pathway, resistance gene-dependent|defense response signaling pathway, resistance gene-independent|peptidyl-proline dioxygenase activity|defense response to bacterium|flavin adenine dinucleotide binding|NADP binding|defense response to fungus…
LOC103400964	0.128392	0.0879486	0	0	0	0		beta-galactosidase 15-like	GO:0004565,GO:0005975,GO:0030246,GO:0048046	beta-galactosidase activity|carbohydrate metabolic process|carbohydrate binding|apoplast
LOC103400966	7.69584	7.33448	7.20908	3.8644	3.69996	5.01186	CCX4	cation/calcium exchanger 4-like	GO:0006812,GO:0006813,GO:0006814,GO:0015297,GO:0016021	cation transport|potassium ion transport|sodium ion transport|antiporter activity|integral component of membrane
LOC103400967	0.143253	0.0470624	0.0272822	0.473071	0.0931523	0.260538	GATA5	GATA transcription factor 5	GO:0003700,GO:0005634,GO:0008270,GO:0043565,GO:0045893	DNA-binding transcription factor activity|nucleus|zinc ion binding|sequence-specific DNA binding|positive regulation of transcription, DNA-templated
LOC103400968	0	0	0	0	0	0	CYP75B2	flavonoid 3'-monooxygenase-like	GO:0004497,GO:0005506,GO:0005789,GO:0009813,GO:0016021,GO:0016705,GO:0020037	monooxygenase activity|iron ion binding|endoplasmic reticulum membrane|flavonoid biosynthetic process|integral component of membrane|oxidoreductase activity, acting on paired donors, with incorporation or reduction of molecular oxygen|heme binding
LOC103400970	0	0	0	0	0	0		uncharacterized LOC103400970
LOC103400972	0	0	0	0	0	0	BG4	probable glucan endo-1,3-beta-glucosidase BG4	GO:0005576,GO:0005975,GO:0006952,GO:0042973,GO:0046658	extracellular region|carbohydrate metabolic process|defense response|glucan endo-1,3-beta-D-glucosidase activity|anchored component of plasma membrane
LOC103400973	0	0	0	0	0	0	DRT100	LRR receptor-like serine/threonine-protein kinase FLS2	GO:0000166,GO:0006281,GO:0009507	nucleotide binding|DNA repair|chloroplast
LOC103400974	6.83665	8.08074	8.99128	5.66237	6.7637	6.49107	MED20A	mediator of RNA polymerase II transcription subunit 20a-like	GO:0003713,GO:0006357,GO:0016592,GO:0035196,GO:0045944,GO:1900150,GO:2000031	transcription coactivator activity|regulation of transcription by RNA polymerase II|mediator complex|production of miRNAs involved in gene silencing by miRNA|positive regulation of transcription by RNA polymerase II|regulation of defense response to fungus|regulation of salicylic acid mediated signaling pathway
LOC103400976	41.9119	43.4232	42.3063	62.4824	76.5713	55.3316		uncharacterized LOC103400976
LOC103400977	9.86754	9.72655	10.7624	10.7313	7.41276	8.58671	RRP44A	exosome complex exonuclease RRP44 homolog A	GO:0000175,GO:0000176,GO:0000177,GO:0000178,GO:0003723,GO:0004519,GO:0006364,GO:0006401,GO:0016075,GO:0046872	3'-5'-exoribonuclease activity|nuclear exosome (RNase complex)|cytoplasmic exosome (RNase complex)|exosome (RNase complex)|RNA binding|endonuclease activity|rRNA processing|RNA catabolic process|rRNA catabolic process|metal ion binding	path:mdm03018	RNA degradation
LOC103400979	10.6124	10.2129	8.87789	9.58957	5.92961	13.1432	GLR3.6	glutamate receptor 3.6-like	GO:0004970,GO:0005262,GO:0005622,GO:0005886,GO:0006816,GO:0007267,GO:0008066,GO:0009611,GO:0009864,GO:0016021,GO:0019722,GO:0071230	ionotropic glutamate receptor activity|calcium channel activity|intracellular|plasma membrane|calcium ion transport|cell-cell signaling|glutamate receptor activity|response to wounding|induced systemic resistance, jasmonic acid mediated signaling pathway|integral component of membrane|calcium-mediated signaling|cellular response to amino acid stimulus
LOC103400980	0	0	0	0	0	0	GLR3.6	glutamate receptor 3.6-like	GO:0004970,GO:0005262,GO:0005622,GO:0005886,GO:0006816,GO:0007267,GO:0008066,GO:0009611,GO:0009864,GO:0016021,GO:0019722,GO:0071230	ionotropic glutamate receptor activity|calcium channel activity|intracellular|plasma membrane|calcium ion transport|cell-cell signaling|glutamate receptor activity|response to wounding|induced systemic resistance, jasmonic acid mediated signaling pathway|integral component of membrane|calcium-mediated signaling|cellular response to amino acid stimulus
LOC103400981	2.06703	1.52955	2.88883	3.86327	3.38914	2.28263		probable LRR receptor-like serine/threonine-protein kinase At1g34110
LOC103400984	0	0	0	0	0	0	GLR3.6	glutamate receptor 3.6-like	GO:0004970,GO:0005262,GO:0005622,GO:0005886,GO:0006816,GO:0007267,GO:0008066,GO:0009611,GO:0009864,GO:0016021,GO:0019722,GO:0071230	ionotropic glutamate receptor activity|calcium channel activity|intracellular|plasma membrane|calcium ion transport|cell-cell signaling|glutamate receptor activity|response to wounding|induced systemic resistance, jasmonic acid mediated signaling pathway|integral component of membrane|calcium-mediated signaling|cellular response to amino acid stimulus
LOC103400985	0.984922	0.787836	0.552068	0.807473	0.859351	0.618769	At3g51470	probable protein phosphatase 2C 47	GO:0004722,GO:0046872	protein serine/threonine phosphatase activity|metal ion binding
LOC103400986	7.44879	7.26807	5.96784	7.36586	9.64412	6.02772	mrpl19	50S ribosomal protein L11	GO:0000027,GO:0003735,GO:0005737,GO:0005762,GO:0019843,GO:0032543	ribosomal large subunit assembly|structural constituent of ribosome|cytoplasm|mitochondrial large ribosomal subunit|rRNA binding|mitochondrial translation	path:mdm03010	Ribosome
LOC103400987	7.90781	11.4354	8.56183	5.38954	4.02079	5.09582	AVT3C	amino acid transporter AVT3B-like	GO:0003333,GO:0005774,GO:0015171,GO:0015175,GO:0015804,GO:0016021	amino acid transmembrane transport|vacuolar membrane|amino acid transmembrane transporter activity|neutral amino acid transmembrane transporter activity|neutral amino acid transport|integral component of membrane
LOC103400988	18.9088	21.2962	16.7274	12.9348	13.3734	11.7406	dsk1	SRSF protein kinase 1	GO:0000245,GO:0004674,GO:0005524,GO:0005634,GO:0005737,GO:0005829,GO:0007049,GO:0010468,GO:0032153,GO:0035556,GO:0044732,GO:0046827,GO:0048026,GO:0050265,GO:0050684,GO:0051301,GO:0051457	spliceosomal complex assembly|protein serine/threonine kinase activity|ATP binding|nucleus|cytoplasm|cytosol|cell cycle|regulation of gene expression|cell division site|intracellular signal transduction|mitotic spindle pole body|positive regulation of protein export from nucleus|positive regulation of mRNA splicing, via spliceosome|RNA uridylyltransferase activity|regulation of mRNA processing|ce…
LOC103400989	11.212	13.4272	13.6734	21.0994	24.8619	17.3815		uncharacterized LOC103400989
LOC103400991	0.0792931	0.0193112	0.0225351	0	0	0	CYP84A1	cytochrome P450 84A1-like	GO:0004497,GO:0005506,GO:0005783,GO:0009699,GO:0009809,GO:0010224,GO:0016020,GO:0016021,GO:0016709,GO:0020037	monooxygenase activity|iron ion binding|endoplasmic reticulum|phenylpropanoid biosynthetic process|lignin biosynthetic process|response to UV-B|membrane|integral component of membrane|oxidoreductase activity, acting on paired donors, with incorporation or reduction of molecular oxygen, NAD(P)H as one donor, and incorporation of one atom of oxygen|heme binding	path:mdm00940	Phenylpropanoid biosynthesis
LOC103400992	3.96028	4.65181	4.74471	3.99123	5.92465	4.22125		phosphatidylinositol N-acetylglucosaminyltransferase subunit H			path:mdm00563	Glycosylphosphatidylinositol (GPI)-anchor biosynthesis
LOC103400994	28.8076	25.358	16.9299	48.5779	46.585	69.8725		uncharacterized LOC103400994
LOC103400996	0.0334968	0	0	0.069069	0	0	ACD6	ankyrin repeat-containing protein ITN1-like	GO:0005887,GO:0008219,GO:0009416,GO:0009615,GO:0009617,GO:0009751,GO:0009816,GO:0016020,GO:0016567,GO:0030176,GO:0050826,GO:0071446,GO:1900150,GO:1900426,GO:1902290,GO:2000031	integral component of plasma membrane|cell death|response to light stimulus|response to virus|response to bacterium|response to salicylic acid|defense response to bacterium, incompatible interaction|membrane|protein ubiquitination|integral component of endoplasmic reticulum membrane|response to freezing|cellular response to salicylic acid stimulus|regulation of defense response to fungus|positive…
LOC103400999	0	0	0	0	0	0	ACD6	ankyrin repeat-containing protein At5g02620-like	GO:0005887,GO:0008219,GO:0009416,GO:0009615,GO:0009617,GO:0009751,GO:0009816,GO:0016020,GO:0016567,GO:0030176,GO:0050826,GO:0071446,GO:1900150,GO:1900426,GO:1902290,GO:2000031	integral component of plasma membrane|cell death|response to light stimulus|response to virus|response to bacterium|response to salicylic acid|defense response to bacterium, incompatible interaction|membrane|protein ubiquitination|integral component of endoplasmic reticulum membrane|response to freezing|cellular response to salicylic acid stimulus|regulation of defense response to fungus|positive…
LOC103401000	1.21631	2.01426	2.09502	1.05463	1.14996	1.11697	FMP32	protein FMP32, mitochondrial-like	GO:0005739,GO:0016021,GO:0033617	mitochondrion|integral component of membrane|mitochondrial respiratory chain complex IV assembly
LOC103401001	15.4795	12.73	15.2189	12.3745	10.9344	10.8402		heterogeneous nuclear ribonucleoprotein F
LOC103401002	28.2448	29.2288	31.3177	26.7491	23.7228	26.4453	DSK2B	ubiquitin domain-containing protein DSK2b-like	GO:0005634,GO:0005829,GO:0031593	nucleus|cytosol|polyubiquitin modification-dependent protein binding	path:mdm04141	Protein processing in endoplasmic reticulum
LOC103401004	0.14446	0.789668	0.674949	0.398712	0.429359	0.253311	SAT4	serine acetyltransferase 2-like	GO:0000103,GO:0005829,GO:0006535,GO:0009001	sulfate assimilation|cytosol|cysteine biosynthetic process from serine|serine O-acetyltransferase activity	path:mdm00270,path:mdm00920	Cysteine and methionine metabolism|Sulfur metabolism
LOC103401005	9.51709	10.149	11.4673	12.3483	12.647	11.3755	GRIP	protein GRIP	GO:0005802,GO:0007131,GO:0048193	trans-Golgi network|reciprocal meiotic recombination|Golgi vesicle transport
LOC103401006	39.1187	38.2552	40.8556	22.6667	23.9876	25.1869	PSAT1	phosphoserine aminotransferase 1, chloroplastic-like	GO:0004648,GO:0006564,GO:0009507,GO:0009536,GO:0009570,GO:0009735	O-phospho-L-serine:2-oxoglutarate aminotransferase activity|L-serine biosynthetic process|chloroplast|plastid|chloroplast stroma|response to cytokinin	path:mdm00260,path:mdm00270,path:mdm00750	Glycine, serine and threonine metabolism|Cysteine and methionine metabolism|Vitamin B6 metabolism
LOC103401007	36.1771	30.9253	36.2379	28.3534	37.09	30.0096		uncharacterized LOC103401007
LOC103401008	0.0707649	0.181088	0.158098	0	0	0.0246981		G2/mitotic-specific cyclin-2-like	GO:0005634,GO:0007049,GO:0051301	nucleus|cell cycle|cell division
LOC103401011	14.5459	13.5981	13.5477	8.21416	6.18165	7.91191	AAE2	probable acyl-activating enzyme 2	GO:0006631,GO:0016874	fatty acid metabolic process|ligase activity
LOC103401012	2.27143	2.10222	1.76127	1.77718	1.33361	1.9057	MLH3	DNA mismatch repair protein MLH3	GO:0003697,GO:0005524,GO:0005634,GO:0005694,GO:0006298,GO:0007131,GO:0016887,GO:0030983,GO:0032300	single-stranded DNA binding|ATP binding|nucleus|chromosome|mismatch repair|reciprocal meiotic recombination|ATPase activity|mismatched DNA binding|mismatch repair complex	path:mdm03430	Mismatch repair
LOC103401013	2.7732	2.18848	2.73861	2.03691	2.22326	1.9665		uncharacterized LOC103401013
LOC103401020	0	0	0	0	0	0	ZAT3	translation initiation factor IF-2-like	GO:0003676,GO:0003700,GO:0005634,GO:0006355,GO:0046872,GO:0048235	nucleic acid binding|DNA-binding transcription factor activity|nucleus|regulation of transcription, DNA-templated|metal ion binding|pollen sperm cell differentiation
LOC103401021	0	0	0	0	0	0.0254844	CYP71D9	cytochrome P450 71D9-like	GO:0005506,GO:0016020,GO:0016709,GO:0020037	iron ion binding|membrane|oxidoreductase activity, acting on paired donors, with incorporation or reduction of molecular oxygen, NAD(P)H as one donor, and incorporation of one atom of oxygen|heme binding
LOC103401023	0.0875918	0.185196	0.215718	0	0	0	SULTR1	sulfate transporter 1.3-like	GO:0005886,GO:0008271,GO:0009970,GO:0015116,GO:0015293,GO:0015301,GO:0016021	plasma membrane|secondary active sulfate transmembrane transporter activity|cellular response to sulfate starvation|sulfate transmembrane transporter activity|symporter activity|anion:anion antiporter activity|integral component of membrane
LOC103401024	0.146365	0.140539	0.0547365	0	0.136925	0.102374		endochitinase-like	GO:0000272,GO:0004568,GO:0006032,GO:0006952,GO:0008061,GO:0016998	polysaccharide catabolic process|chitinase activity|chitin catabolic process|defense response|chitin binding|cell wall macromolecule catabolic process	path:mdm00520,path:mdm04016	Amino sugar and nucleotide sugar metabolism|MAPK signaling pathway - plant
LOC103401025	1.29182	1.24268	1.11301	3.09831	2.00156	3.24646		uncharacterized LOC103401025
LOC103401028	0.0736476	0.0474389	0.16572	0.101586	0.230828	0	AATL1	lysine histidine transporter-like 8	GO:0003333,GO:0005886,GO:0015171,GO:0016021	amino acid transmembrane transport|plasma membrane|amino acid transmembrane transporter activity|integral component of membrane
LOC103401029	5.97867	5.883	5.22563	5.18388	5.48418	4.7214	PAT10	protein S-acyltransferase 10-like	GO:0005774,GO:0005783,GO:0005794,GO:0006612,GO:0009651,GO:0009705,GO:0016021,GO:0018230,GO:0019706,GO:0099402	vacuolar membrane|endoplasmic reticulum|Golgi apparatus|protein targeting to membrane|response to salt stress|plant-type vacuole membrane|integral component of membrane|peptidyl-L-cysteine S-palmitoylation|protein-cysteine S-palmitoyltransferase activity|plant organ development
LOC103401030	24.5682	19.5959	17.018	19.0473	19.7809	18.6501	SKIP23	putative F-box protein At1g65770	GO:0005634,GO:0016567	nucleus|protein ubiquitination
LOC103401031	9.77423	10.0746	10.9043	13.8186	9.73195	6.19862		ganglioside-induced differentiation-associated-protein 2-like
LOC103401033	1.55099	0.951656	1.53514	2.51876	3.18464	1.4884	IQD1	protein IQ-DOMAIN 14-like	GO:0005516,GO:0005634,GO:0005737,GO:0005874,GO:0008017	calmodulin binding|nucleus|cytoplasm|microtubule|microtubule binding
LOC103401034	17.2892	13.0847	14.013	13.3969	12.9423	15.0778	STY17	serine/threonine-protein kinase STY17-like	GO:0004674,GO:0004712,GO:0005524,GO:0005829,GO:0009658	protein serine/threonine kinase activity|protein serine/threonine/tyrosine kinase activity|ATP binding|cytosol|chloroplast organization
LOC103401035	12.0422	13.3456	12.3649	8.80524	8.3039	11.2463	BBD2	bifunctional nuclease 2	GO:0004518,GO:0005634	nuclease activity|nucleus
LOC103401036	16.658	17.2671	16.336	17.4133	14.832	15.0551	AKRP	ankyrin repeat domain-containing protein, chloroplastic	GO:0009507,GO:0030941,GO:0031359,GO:0045036	chloroplast|chloroplast targeting sequence binding|integral component of chloroplast outer membrane|protein targeting to chloroplast
LOC103401038	0.805879	0.398543	0.897832	7.71277	8.77943	6.82979	PLDDELTA	phospholipase D delta	GO:0004630,GO:0005509,GO:0005773,GO:0005886,GO:0009409,GO:0009506,GO:0009789,GO:0012501,GO:0016020,GO:0016042,GO:0046470,GO:0046473,GO:0070290,GO:0090333	phospholipase D activity|calcium ion binding|vacuole|plasma membrane|response to cold|plasmodesma|positive regulation of abscisic acid-activated signaling pathway|programmed cell death|membrane|lipid catabolic process|phosphatidylcholine metabolic process|phosphatidic acid metabolic process|N-acylphosphatidylethanolamine-specific phospholipase D activity|regulation of stomatal closure	path:mdm00564,path:mdm00565,path:mdm04144	Glycerophospholipid metabolism|Ether lipid metabolism|Endocytosis
LOC103401039	7.8893	7.94959	7.4734	7.28679	4.2574	7.06995	NRPB1	DNA-directed RNA polymerase II subunit 1	GO:0003677,GO:0003899,GO:0005665,GO:0005773,GO:0006366,GO:0009506,GO:0009507,GO:0046872	DNA binding|DNA-directed 5'-3' RNA polymerase activity|RNA polymerase II, core complex|vacuole|transcription by RNA polymerase II|plasmodesma|chloroplast|metal ion binding	path:mdm03020	RNA polymerase
LOC103401040	56.2756	64.9547	64.1706	65.6924	83.9547	75.6494	P4H10	probable prolyl 4-hydroxylase 10	GO:0004656,GO:0005506,GO:0005783,GO:0005789,GO:0016021,GO:0018401,GO:0031418	procollagen-proline 4-dioxygenase activity|iron ion binding|endoplasmic reticulum|endoplasmic reticulum membrane|integral component of membrane|peptidyl-proline hydroxylation to 4-hydroxy-L-proline|L-ascorbic acid binding	path:mdm00330	Arginine and proline metabolism
LOC103401041	130.406	157.377	146.262	117.804	123.992	126.176	ACO1	aconitate hydratase 1	GO:0003994,GO:0005507,GO:0005739,GO:0005773,GO:0005829,GO:0005886,GO:0006099,GO:0006101,GO:0006102,GO:0009506,GO:0009651,GO:0048027,GO:0048046,GO:0051539,GO:1990641	aconitate hydratase activity|copper ion binding|mitochondrion|vacuole|cytosol|plasma membrane|tricarboxylic acid cycle|citrate metabolic process|isocitrate metabolic process|plasmodesma|response to salt stress|mRNA 5'-UTR binding|apoplast|4 iron, 4 sulfur cluster binding|response to iron ion starvation	path:mdm00020,path:mdm00630	Citrate cycle (TCA cycle)|Glyoxylate and dicarboxylate metabolism
LOC103401042	42.0505	42.058	43.7728	29.4544	32.0414	22.582	NIP2	NEP1-interacting protein 1	GO:0009535,GO:0016021,GO:0046872	chloroplast thylakoid membrane|integral component of membrane|metal ion binding
LOC103401043	22.8834	18.3822	22.0304	22.7638	22.284	19.1426	Os06g0717800	probable protein phosphatase 2C 46	GO:0004722,GO:0016021,GO:0046872	protein serine/threonine phosphatase activity|integral component of membrane|metal ion binding
LOC103401044	13.9455	21.4399	15.7763	11.5175	20.7689	17.5835	APF1	aspartyl protease family protein 1	GO:0004190,GO:0005886,GO:0006508,GO:0030163,GO:0031225	aspartic-type endopeptidase activity|plasma membrane|proteolysis|protein catabolic process|anchored component of membrane
LOC103401045	0.0509157	0	0.0570699	0	0.0477528	0		uncharacterized LOC103401045
LOC103401046	5.78094	4.64203	4.35512	3.49766	3.47	4.66207	GFS10	CSC1-like protein At4g35870	GO:0005227,GO:0005622,GO:0005886,GO:0006623,GO:0016021	calcium activated cation channel activity|intracellular|plasma membrane|protein targeting to vacuole|integral component of membrane
LOC103401047	5.5302	4.47025	4.8683	5.11787	4.41215	5.06349	MORC2	protein MICRORCHIDIA 2-like	GO:0003677,GO:0003723,GO:0004519,GO:0005524,GO:0005634,GO:0005768,GO:0006281,GO:0006282,GO:0006325,GO:0009626,GO:0016301,GO:0016887,GO:0031047,GO:0051607,GO:1900426,GO:1901672	DNA binding|RNA binding|endonuclease activity|ATP binding|nucleus|endosome|DNA repair|regulation of DNA repair|chromatin organization|plant-type hypersensitive response|kinase activity|ATPase activity|gene silencing by RNA|defense response to virus|positive regulation of defense response to bacterium|positive regulation of systemic acquired resistance
LOC103401048	10.8321	9.21756	9.48322	14.66	10.8329	8.93999	APF1	aspartyl protease family protein 1-like	GO:0004190,GO:0005886,GO:0006508,GO:0030163,GO:0031225	aspartic-type endopeptidase activity|plasma membrane|proteolysis|protein catabolic process|anchored component of membrane
LOC103401050	0.208698	0.336653	0	0.358096	1.70363	1.02056		uncharacterized LOC103401050
LOC103401051	0.0370119	0	0	0.0384162	0	0	PER64	peroxidase 64-like	GO:0004601,GO:0005576,GO:0006979,GO:0009505,GO:0009506,GO:0020037,GO:0042744,GO:0046872	peroxidase activity|extracellular region|response to oxidative stress|plant-type cell wall|plasmodesma|heme binding|hydrogen peroxide catabolic process|metal ion binding	path:mdm00940	Phenylpropanoid biosynthesis
LOC103401052	4.77315	3.7438	4.30541	2.10571	2.48561	2.15538	SPAC3A11.03	methyltransferase-like protein 23	GO:0005737,GO:0008757,GO:2000765	cytoplasm|S-adenosylmethionine-dependent methyltransferase activity|regulation of cytoplasmic translation
LOC103401053	14.9658	18.46	17.7161	12.2515	12.346	12.4567	LARP1C	la-related protein 1C	GO:0003729,GO:0005737,GO:0005844,GO:0009737,GO:0009738,GO:0009751,GO:0009753,GO:0010150	mRNA binding|cytoplasm|polysome|response to abscisic acid|abscisic acid-activated signaling pathway|response to salicylic acid|response to jasmonic acid|leaf senescence
LOC103401054	0.0357805	0	0	0	0	0	FD	protein FD	GO:0003677,GO:0003700,GO:0005634,GO:0006355,GO:0009648,GO:0009909,GO:0009911,GO:0043621,GO:0045893,GO:2000028	DNA binding|DNA-binding transcription factor activity|nucleus|regulation of transcription, DNA-templated|photoperiodism|regulation of flower development|positive regulation of flower development|protein self-association|positive regulation of transcription, DNA-templated|regulation of photoperiodism, flowering
LOC103401055	29.1305	21.4349	26.4978	39.3941	47.0843	36.4924		UPF0434 protein Mmwyl1_2153
LOC103401056	1.46964	0.872762	0.965994	2.02459	2.23278	1.99423	At3g51320	pentatricopeptide repeat-containing protein At3g51320
LOC103401057	27.0541	26.9779	26.2157	30.4778	26.7995	30.71		uncharacterized LOC103401057
LOC103401058	136.537	129.229	138.38	147.31	182.09	152.198	SKP1A	SKP1-like protein 1A	GO:0000226,GO:0005634,GO:0005819,GO:0005829,GO:0005886,GO:0006511,GO:0007059,GO:0007275,GO:0009524,GO:0009734,GO:0009873,GO:0016032,GO:0016567,GO:0045910,GO:0046686	microtubule cytoskeleton organization|nucleus|spindle|cytosol|plasma membrane|ubiquitin-dependent protein catabolic process|chromosome segregation|multicellular organism development|phragmoplast|auxin-activated signaling pathway|ethylene-activated signaling pathway|viral process|protein ubiquitination|negative regulation of DNA recombination|response to cadmium ion	path:mdm04120,path:mdm04141	Ubiquitin mediated proteolysis|Protein processing in endoplasmic reticulum
LOC103401059	0.841624	0.135601	0.392845	0.359902	0.230044	0.366578	At4g35930	F-box protein At4g35930
LOC103401060	39.733	39.4959	43.1087	33.9057	31.876	31.5304	VPS35A	vacuolar protein sorting-associated protein 35A	GO:0005770,GO:0005794,GO:0005829,GO:0006886,GO:0008565,GO:0010008,GO:0030904,GO:0030906,GO:0031902,GO:0042147	late endosome|Golgi apparatus|cytosol|intracellular protein transport|protein transporter activity|endosome membrane|retromer complex|retromer, cargo-selective complex|late endosome membrane|retrograde transport, endosome to Golgi	path:mdm04144	Endocytosis
LOC103401061	40.649	54.2107	49.8586	44.1228	64.9006	51.8899	ARAC1	rac-like GTP-binding protein ARAC1	GO:0000902,GO:0003924,GO:0005525,GO:0005634,GO:0005737,GO:0005819,GO:0005886,GO:0007015,GO:0007266,GO:0009524,GO:0009734,GO:0009738,GO:0016477,GO:0019901,GO:0030036,GO:0030838,GO:0031532	cell morphogenesis|GTPase activity|GTP binding|nucleus|cytoplasm|spindle|plasma membrane|actin filament organization|Rho protein signal transduction|phragmoplast|auxin-activated signaling pathway|abscisic acid-activated signaling pathway|cell migration|protein kinase binding|actin cytoskeleton organization|positive regulation of actin filament polymerization|actin cytoskeleton reorganization	path:mdm04145,path:mdm04933	Phagosome|AGE-RAGE signaling pathway in diabetic complications
LOC103401062	9.22475	8.43302	9.13414	12.9588	12.1825	11.284	ERD7	protein EARLY-RESPONSIVE TO DEHYDRATION 7, chloroplastic-like	GO:0005886,GO:0007623,GO:0009409,GO:0009414,GO:0009507,GO:0009644,GO:0009651,GO:0009737	plasma membrane|circadian rhythm|response to cold|response to water deprivation|chloroplast|response to high light intensity|response to salt stress|response to abscisic acid	path:mdm04144	Endocytosis
LOC103401063	2.82176	4.05395	4.42719	6.95012	3.79019	4.70912	AHK1	histidine kinase 1-like	GO:0000155,GO:0005034,GO:0005622,GO:0005886,GO:0006970,GO:0009414,GO:0009738,GO:0009927,GO:0010375,GO:0010431,GO:0016021	phosphorelay sensor kinase activity|osmosensor activity|intracellular|plasma membrane|response to osmotic stress|response to water deprivation|abscisic acid-activated signaling pathway|histidine phosphotransfer kinase activity|stomatal complex patterning|seed maturation|integral component of membrane
LOC103401064	123.473	111.833	118.994	134.16	155.998	147.927	PAD1	proteasome subunit alpha type-7	GO:0004298,GO:0005634,GO:0005737,GO:0006511,GO:0019773	threonine-type endopeptidase activity|nucleus|cytoplasm|ubiquitin-dependent protein catabolic process|proteasome core complex, alpha-subunit complex	path:mdm03050	Proteasome
LOC103401065	0.158401	0.185589	0.196408	1.009	0.737231	1.8622	MIK2	MDIS1-interacting receptor like kinase 2-like
LOC103401066	0	0	0	0.0224148	0	0	At3g51280	protein POLLENLESS 3-LIKE 2-like	GO:0005634,GO:0007049,GO:0051301	nucleus|cell cycle|cell division
LOC103401068	1.10851	0.444831	0.227568	1.22783	2.46275	5.09316	TLP1	thaumatin-like protein 1	GO:0006952,GO:0009617,GO:0009723	defense response|response to bacterium|response to ethylene
LOC103401071	1.11758	3.90453	1.25063	2.62782	3.25921	3.06617		pentatricopeptide repeat-containing protein At2g17670-like
LOC103401072	0.104485	0.102635	0.10204	0.0475041	0.028698	0		uncharacterized protein DDB_G0290685-like
LOC103401074	0	0	0	0	0	0		uncharacterized LOC103401074
LOC103401076	0	0	0	0	0	0		ganglioside-induced differentiation-associated protein 2-like
LOC103401079	0.115283	0	0	0.0600771	0	0.0906387	SKIP23	F-box protein SKIP23-like	GO:0005634,GO:0016567	nucleus|protein ubiquitination
LOC103401081	0	0	0	0	0	0	At1g07560	probable serine/threonine-protein kinase PBL4
LOC103401083	3.50737	4.3605	3.39115	3.56253	2.97504	3.14548		uncharacterized LOC103401083
LOC103401086	0.945021	1.51357	1.69013	1.88755	1.65424	1.3025		uncharacterized LOC103401086
LOC103401089	55.042	72.647	59.1562	282.217	225.922	262.592	ALDH3F1	aldehyde dehydrogenase family 3 member F1-like	GO:0004028,GO:0004029,GO:0005783,GO:0006081,GO:0016020,GO:0043878	3-chloroallyl aldehyde dehydrogenase activity|aldehyde dehydrogenase (NAD) activity|endoplasmic reticulum|cellular aldehyde metabolic process|membrane|glyceraldehyde-3-phosphate dehydrogenase (NAD+) (non-phosphorylating) activity	path:mdm00010,path:mdm00053,path:mdm00071,path:mdm00280,path:mdm00310,path:mdm00330,path:mdm00340,path:mdm00380,path:mdm00410,path:mdm00561,path:mdm00620,path:mdm00903	Glycolysis / Gluconeogenesis|Ascorbate and aldarate metabolism|Fatty acid degradation|Valine, leucine and isoleucine degradation|Lysine degradation|Arginine and proline metabolism|Histidine metabolism|Tryptophan metabolism|beta-Alanine metabolism|Glycerolipid metabolism|Pyruvate metabolism|Limonene and pinene degradation
LOC103401090	5.99947	11.2216	12.9398	5.74357	8.3016	4.6276		uncharacterized LOC103401090
LOC103401091	2.15546	2.7154	2.15528	0.604683	1.41028	0.69991	GRXC3	glutaredoxin-C3-like	GO:0004362,GO:0005794,GO:0009055,GO:0015035,GO:0034599,GO:0045454	glutathione-disulfide reductase activity|Golgi apparatus|electron transfer activity|protein disulfide oxidoreductase activity|cellular response to oxidative stress|cell redox homeostasis
LOC103401092	0.0627538	0.0507633	0.0355154	0	0.0198987	0.0111813	At3g51070	probable methyltransferase PMT27	GO:0005768,GO:0005789,GO:0005802,GO:0008757,GO:0016021,GO:0052546	endosome|endoplasmic reticulum membrane|trans-Golgi network|S-adenosylmethionine-dependent methyltransferase activity|integral component of membrane|cell wall pectin metabolic process
LOC103401093	0.165842	0.180708	0.0840058	0.210286	0.177714	0.0802997	SHI	protein SHORT INTERNODES-like	GO:0003677,GO:0003700,GO:0005634,GO:0009555,GO:0009734,GO:0009739,GO:0009740,GO:0009851,GO:0009938,GO:0045893,GO:0046872,GO:0046982,GO:0048653	DNA binding|DNA-binding transcription factor activity|nucleus|pollen development|auxin-activated signaling pathway|response to gibberellin|gibberellic acid mediated signaling pathway|auxin biosynthetic process|negative regulation of gibberellic acid mediated signaling pathway|positive regulation of transcription, DNA-templated|metal ion binding|protein heterodimerization activity|anther developme…
LOC103401095	1.52968	1.13438	1.65061	1.32852	1.77387	1.59909	BGAL3	beta-galactosidase 3-like	GO:0004565,GO:0005618,GO:0005773,GO:0005975,GO:0009505,GO:0030246,GO:0048046	beta-galactosidase activity|cell wall|vacuole|carbohydrate metabolic process|plant-type cell wall|carbohydrate binding|apoplast
LOC103401096	2.96518	2.57907	3.66106	5.39402	6.74996	5.33771	RTH	protein RTE1-HOMOLOG	GO:0016021	integral component of membrane	path:mdm04016	MAPK signaling pathway - plant
LOC103401097	24.2747	30.6087	28.4986	22.7567	24.9544	25.7303		uncharacterized LOC103401097
LOC103401098	6.85141	7.60448	6.83229	6.58746	4.74426	5.70772	At4g36390	CDK5RAP1-like protein	GO:0000079,GO:0005739,GO:0006400,GO:0016740,GO:0045736,GO:0046872,GO:0051539	regulation of cyclin-dependent protein serine/threonine kinase activity|mitochondrion|tRNA modification|transferase activity|negative regulation of cyclin-dependent protein serine/threonine kinase activity|metal ion binding|4 iron, 4 sulfur cluster binding
LOC103401099	27.0517	27.7384	26.4876	16.9473	16.1665	18.3754	D2HGDH	D-2-hydroxyglutarate dehydrogenase, mitochondrial	GO:0004458,GO:0005739,GO:0006807,GO:0009853,GO:0019516,GO:0022904,GO:0031234,GO:0047545,GO:0051990,GO:0071949	D-lactate dehydrogenase (cytochrome) activity|mitochondrion|nitrogen compound metabolic process|photorespiration|lactate oxidation|respiratory electron transport chain|extrinsic component of cytoplasmic side of plasma membrane|2-hydroxyglutarate dehydrogenase activity|(R)-2-hydroxyglutarate dehydrogenase activity|FAD binding
LOC103401104	12.3433	10.2335	12.67	8.05299	6.15335	7.82539	alg-2	uncharacterized LOC103401104	GO:0000033,GO:0004378,GO:0005789,GO:0006490,GO:0016021,GO:0033577,GO:0102704	alpha-1,3-mannosyltransferase activity|GDP-Man:Man1GlcNAc2-PP-Dol alpha-1,3-mannosyltransferase activity|endoplasmic reticulum membrane|oligosaccharide-lipid intermediate biosynthetic process|integral component of membrane|protein glycosylation in endoplasmic reticulum|GDP-Man:Man2GlcNAc2-PP-dolichol alpha-1,6-mannosyltransferase activity
LOC103401105	2.12592	2.2133	2.10671	1.49441	1.2953	1.50549	PCMP-H17	pentatricopeptide repeat-containing protein At5g44230
LOC103401107	2.22253	1.97019	1.73448	1.79829	1.99518	1.68114	FRS5	protein FAR1-RELATED SEQUENCE 5-like	GO:0005634,GO:0006355,GO:0008270	nucleus|regulation of transcription, DNA-templated|zinc ion binding
LOC103401108	15.4168	16.4154	16.3772	8.06751	9.27457	9.13472	alg-2	uncharacterized LOC103401108	GO:0000033,GO:0004378,GO:0005789,GO:0006490,GO:0016021,GO:0033577,GO:0102704	alpha-1,3-mannosyltransferase activity|GDP-Man:Man1GlcNAc2-PP-Dol alpha-1,3-mannosyltransferase activity|endoplasmic reticulum membrane|oligosaccharide-lipid intermediate biosynthetic process|integral component of membrane|protein glycosylation in endoplasmic reticulum|GDP-Man:Man2GlcNAc2-PP-dolichol alpha-1,6-mannosyltransferase activity
LOC103401109	7.7255	7.66683	7.88478	5.65286	5.52965	6.10809		uncharacterized LOC103401109
LOC103401110	0	0	0	0	0	0.0374899	PER72	peroxidase 72	GO:0004601,GO:0005576,GO:0006979,GO:0009809,GO:0020037,GO:0042744,GO:0046872	peroxidase activity|extracellular region|response to oxidative stress|lignin biosynthetic process|heme binding|hydrogen peroxide catabolic process|metal ion binding	path:mdm00940	Phenylpropanoid biosynthesis
LOC103401112	2.56564	2.10547	2.11915	1.71278	1.07914	2.06482		uncharacterized LOC103401112
LOC103401116	1.75185	0.707241	0.753887	2.48513	5.61934	1.57981	At2g18190	AAA-ATPase At2g18190-like	GO:0005524,GO:0009651,GO:0016021,GO:0016887	ATP binding|response to salt stress|integral component of membrane|ATPase activity
LOC103401119	0.0225081	0	0.0252415	0.09257	0	0.0471754	PHT4	ascorbate transporter, chloroplastic-like	GO:0005315,GO:0009507,GO:0009536,GO:0009706,GO:0009941,GO:0010028,GO:0015229,GO:0015882,GO:0016021	inorganic phosphate transmembrane transporter activity|chloroplast|plastid|chloroplast inner membrane|chloroplast envelope|xanthophyll cycle|L-ascorbic acid transmembrane transporter activity|L-ascorbic acid transmembrane transport|integral component of membrane
LOC103401120	1.7424	0.953413	4.1515	44.7343	31.7701	47.6292	SAUR21	auxin-responsive protein SAUR21-like	GO:0005886,GO:0007275,GO:0009734,GO:0040008	plasma membrane|multicellular organism development|auxin-activated signaling pathway|regulation of growth	path:mdm04075	Plant hormone signal transduction
LOC103401122	6.29865	5.02407	5.92178	3.49608	3.43302	4.70982	FRS5	protein FAR1-RELATED SEQUENCE 5-like	GO:0005634,GO:0006355,GO:0008270	nucleus|regulation of transcription, DNA-templated|zinc ion binding
LOC103401124	83.1143	82.4881	87.4124	87.9442	73.2857	85.3496	PPA6	soluble inorganic pyrophosphatase 6, chloroplastic-like	GO:0000287,GO:0004427,GO:0006796,GO:0009507,GO:0009536,GO:0009570,GO:0009579,GO:0009651,GO:0009941,GO:0042742,GO:0046686	magnesium ion binding|inorganic diphosphatase activity|phosphate-containing compound metabolic process|chloroplast|plastid|chloroplast stroma|thylakoid|response to salt stress|chloroplast envelope|defense response to bacterium|response to cadmium ion	path:mdm00190	Oxidative phosphorylation
LOC103401125	0.122724	0.294843	0.0687772	0.320387	0.28566	0.0636265	TWN2	valine--tRNA ligase, mitochondrial 1-like	GO:0002161,GO:0004832,GO:0005524,GO:0005739,GO:0005829,GO:0006438,GO:0009507,GO:0009793	aminoacyl-tRNA editing activity|valine-tRNA ligase activity|ATP binding|mitochondrion|cytosol|valyl-tRNA aminoacylation|chloroplast|embryo development ending in seed dormancy	path:mdm00970	Aminoacyl-tRNA biosynthesis
LOC103401126	12.8759	13.2938	13.3332	11.8206	11.9217	11.3978	LIF2	heterogeneous nuclear ribonucleoprotein Q-like	GO:0003682,GO:0003729,GO:0005634,GO:0005737,GO:0005783,GO:0005829,GO:0007275,GO:0009617,GO:0009909,GO:0010439,GO:0010468,GO:0042742,GO:0043565,GO:0045087,GO:0045824,GO:0045893,GO:0050832,GO:0071395,GO:1902464,GO:1905933	chromatin binding|mRNA binding|nucleus|cytoplasm|endoplasmic reticulum|cytosol|multicellular organism development|response to bacterium|regulation of flower development|regulation of glucosinolate biosynthetic process|regulation of gene expression|defense response to bacterium|sequence-specific DNA binding|innate immune response|negative regulation of innate immune response|positive regulation of…
LOC103401129	30.728	28.3626	29.1019	27.0367	22.1792	28.4164		UPF0261 protein mll9388
LOC103401130	0	0	0	0	0	0	HIPP43	heavy metal-associated isoprenylated plant protein 43	GO:0030001,GO:0046872	metal ion transport|metal ion binding
LOC103401131	0	0	0	0.0369141	0.100755	0	SAMT	salicylate carboxymethyltransferase	GO:0008168,GO:0046872	methyltransferase activity|metal ion binding
LOC103401133	12.2519	13.2139	11.5987	9.99943	12.6925	9.99408	LPPE2	lipid phosphate phosphatase epsilon 2, chloroplastic	GO:0006487,GO:0006651,GO:0008195,GO:0008610,GO:0009507,GO:0009706,GO:0030176,GO:0047874	protein N-linked glycosylation|diacylglycerol biosynthetic process|phosphatidate phosphatase activity|lipid biosynthetic process|chloroplast|chloroplast inner membrane|integral component of endoplasmic reticulum membrane|dolichyldiphosphatase activity	path:mdm00510	N-Glycan biosynthesis
LOC103401134	0	0	0	0	0	0	MAN7	mannan endo-1,4-beta-mannosidase 7	GO:0005576,GO:0009828,GO:0009845,GO:0010047,GO:0016985,GO:0046355,GO:0071944,GO:1990059	extracellular region|plant-type cell wall loosening|seed germination|fruit dehiscence|mannan endo-1,4-beta-mannosidase activity|mannan catabolic process|cell periphery|fruit valve development	path:mdm00051	Fructose and mannose metabolism
LOC103401135	2.05791	4.94062	5.13684	4.34044	2.50089	1.06682		dehydrin DHN3-like
LOC103401136	9.45186	13.9105	12.0664	7.45331	6.47218	7.54522	At5g66470	GTPase ERA-like, chloroplastic	GO:0000028,GO:0005525,GO:0006364,GO:0009507,GO:0019843,GO:0042254,GO:0042644,GO:0043024	ribosomal small subunit assembly|GTP binding|rRNA processing|chloroplast|rRNA binding|ribosome biogenesis|chloroplast nucleoid|ribosomal small subunit binding
LOC103401137	3.60194	3.09375	3.26705	3.0021	3.79636	3.44576		uncharacterized LOC103401137
LOC103401138	19.3429	20.1492	23.1967	16.0749	21.7356	15.2619	SIP2-1	probable aquaporin SIP2-1	GO:0005789,GO:0015267,GO:0016021	endoplasmic reticulum membrane|channel activity|integral component of membrane
LOC103401139	1.02867	0.808422	0.835207	0.793614	0.631702	0.881983	PCMP-E38	pentatricopeptide repeat-containing protein At5g66500, mitochondrial
LOC103401140	8.45011	6.1749	6.86728	8.90801	6.3192	10.6712	AUL1	auxilin-like protein 1	GO:0005737,GO:0006898,GO:0030276,GO:0031982,GO:0043231,GO:0072318,GO:0072583	cytoplasm|receptor-mediated endocytosis|clathrin binding|vesicle|intracellular membrane-bounded organelle|clathrin coat disassembly|clathrin-dependent endocytosis
LOC103401141	12.65	14.4219	12.8618	8.14429	11.5745	7.0942	COAD	phosphopantetheine adenylyltransferase	GO:0004140,GO:0004595,GO:0005524,GO:0005829,GO:0006629,GO:0006970,GO:0009651,GO:0015937,GO:0019915,GO:0080020	dephospho-CoA kinase activity|pantetheine-phosphate adenylyltransferase activity|ATP binding|cytosol|lipid metabolic process|response to osmotic stress|response to salt stress|coenzyme A biosynthetic process|lipid storage|regulation of coenzyme A biosynthetic process	path:mdm00770	Pantothenate and CoA biosynthesis
LOC103401142	6.52386	4.67879	5.85433	6.72523	2.61779	3.99157	PPH	pheophytinase, chloroplastic	GO:0009507,GO:0009535,GO:0009570,GO:0015996,GO:0080124	chloroplast|chloroplast thylakoid membrane|chloroplast stroma|chlorophyll catabolic process|pheophytinase activity
LOC103401143	3.58765	4.60253	4.14238	4.18466	1.71472	3.40565		transmembrane protein 53-like
LOC103401144	1.21076	3.34759	3.4736	56.3281	46.915	29.5553		dehydrin Xero 1
LOC103401145	38.1077	31.5045	33.6107	48.1422	61.0467	43.9687	RER1B	protein RER1B-like	GO:0005783,GO:0005794,GO:0005801,GO:0006621,GO:0006890,GO:0030173	endoplasmic reticulum|Golgi apparatus|cis-Golgi network|protein retention in ER lumen|retrograde vesicle-mediated transport, Golgi to ER|integral component of Golgi membrane
LOC103401146	59.4202	65.6565	60.1529	80.0709	92.1942	68.4373	RER1B	protein RER1B-like	GO:0005783,GO:0005794,GO:0005801,GO:0006621,GO:0006890,GO:0030173	endoplasmic reticulum|Golgi apparatus|cis-Golgi network|protein retention in ER lumen|retrograde vesicle-mediated transport, Golgi to ER|integral component of Golgi membrane
LOC103401147	19.3605	24.3269	21.0305	24.4911	22.3748	24.8807	GAMMACA1	gamma carbonic anhydrase 1, mitochondrial	GO:0004089,GO:0005739,GO:0005747,GO:0009853,GO:0031966,GO:0045271,GO:0046872,GO:0070207	carbonate dehydratase activity|mitochondrion|mitochondrial respiratory chain complex I|photorespiration|mitochondrial membrane|respiratory chain complex I|metal ion binding|protein homotrimerization
LOC103401148	6.97994	3.52247	4.19377	5.84272	4.01323	5.23335	PUB5	U-box domain-containing protein 5-like	GO:0004842,GO:0005634,GO:0005737	ubiquitin-protein transferase activity|nucleus|cytoplasm
LOC103401149	8.78399	15.4311	12.6064	20.6816	31.7885	21.4882	TULP5	tubby-like F-box protein 5	GO:0005929,GO:0035091,GO:0061512	cilium|phosphatidylinositol binding|protein localization to cilium
LOC103401150	0.045473	0	0	0	0	0	LAC11	laccase-11-like	GO:0005507,GO:0016722,GO:0046274,GO:0048046,GO:0052716	copper ion binding|oxidoreductase activity, oxidizing metal ions|lignin catabolic process|apoplast|hydroquinone:oxygen oxidoreductase activity
LOC103401151	14.788	14.6493	18.3489	11.5109	12.0211	9.78553	UVR8	ultraviolet-B receptor UVR8	GO:0000785,GO:0003682,GO:0005085,GO:0005634,GO:0005829,GO:0009411,GO:0009649,GO:0009881,GO:0010224,GO:0018298,GO:0042802,GO:0042803	chromatin|chromatin binding|guanyl-nucleotide exchange factor activity|nucleus|cytosol|response to UV|entrainment of circadian clock|photoreceptor activity|response to UV-B|protein-chromophore linkage|identical protein binding|protein homodimerization activity
LOC103401152	0	0	0	0	0.0277357	0		epoxide hydrolase 1
LOC103401153	0	0	0	0	0	0	GATA18	GATA transcription factor 18	GO:0001228,GO:0003700,GO:0005634,GO:0006355,GO:0008270,GO:0009793,GO:0009908,GO:0009909,GO:0009934,GO:0042803,GO:0043565,GO:0045892,GO:0048825	DNA-binding transcription activator activity, RNA polymerase II-specific|DNA-binding transcription factor activity|nucleus|regulation of transcription, DNA-templated|zinc ion binding|embryo development ending in seed dormancy|flower development|regulation of flower development|regulation of meristem structural organization|protein homodimerization activity|sequence-specific DNA binding|negative r…
LOC103401156	1.41607	0.975792	1.43271	1.2734	1.20219	1.09529	CRTISO	pyridine nucleotide-disulfide oxidoreductase domain-containing protein 2	GO:0016117,GO:0016491,GO:0031969,GO:0046608	carotenoid biosynthetic process|oxidoreductase activity|chloroplast membrane|carotenoid isomerase activity
LOC103401157	0	0.288659	0.143266	0.339207	0.405283	0.227303	rrg1	protein N-lysine methyltransferase METTL21A	GO:0005634,GO:0005829,GO:0016279,GO:2000765	nucleus|cytosol|protein-lysine N-methyltransferase activity|regulation of cytoplasmic translation
LOC103401158	1.1463	1.03371	0.929554	1.28566	0.630398	0.654379	ADT6	arogenate dehydratase/prephenate dehydratase 6, chloroplastic-like	GO:0004664,GO:0009094,GO:0009507,GO:0009570,GO:0047769	prephenate dehydratase activity|L-phenylalanine biosynthetic process|chloroplast|chloroplast stroma|arogenate dehydratase activity	path:mdm00400	Phenylalanine, tyrosine and tryptophan biosynthesis
LOC103401159	0	0	0	0	0	0		uncharacterized LOC103401159
LOC103401163	8.92177	6.73192	6.205	7.72595	6.0041	9.72591	SCL7	SCARECROW-LIKE protein 7	GO:0003677,GO:0005634	DNA binding|nucleus
LOC103401164	1.15887	3.12699	2.68538	1.47814	0.739093	1.0456	CYP90B1	cytochrome P450 90B1-like	GO:0004497,GO:0005506,GO:0005783,GO:0007275,GO:0009741,GO:0009753,GO:0009826,GO:0009867,GO:0010012,GO:0010268,GO:0010358,GO:0016021,GO:0016125,GO:0016132,GO:0016705,GO:0020037,GO:0048366,GO:0055114	monooxygenase activity|iron ion binding|endoplasmic reticulum|multicellular organism development|response to brassinosteroid|response to jasmonic acid|unidimensional cell growth|jasmonic acid mediated signaling pathway|steroid 22-alpha hydroxylase activity|brassinosteroid homeostasis|leaf shaping|integral component of membrane|sterol metabolic process|brassinosteroid biosynthetic process|oxidored…	path:mdm00905	Brassinosteroid biosynthesis
LOC103401165	1.9064	3.1236	1.87163	24.0744	7.11202	4.9811		water stress-inducible protein Rab21-like
LOC103401166	61.2988	61.6268	61.0263	65.484	62.6581	62.9273	SDH1-1	succinate dehydrogenase [ubiquinone] flavoprotein subunit, mitochondrial	GO:0000104,GO:0005524,GO:0005618,GO:0005739,GO:0005749,GO:0006099,GO:0006121,GO:0008177,GO:0009055,GO:0009061,GO:0045273,GO:0045282,GO:0050660,GO:0050897	succinate dehydrogenase activity|ATP binding|cell wall|mitochondrion|mitochondrial respiratory chain complex II, succinate dehydrogenase complex (ubiquinone)|tricarboxylic acid cycle|mitochondrial electron transport, succinate to ubiquinone|succinate dehydrogenase (ubiquinone) activity|electron transfer activity|anaerobic respiration|respiratory chain complex II|plasma membrane succinate dehydrog…	path:mdm00020,path:mdm00190	Citrate cycle (TCA cycle)|Oxidative phosphorylation
LOC103401167	0.677032	0.559248	0.483194	0.0343644	0.0774135	0.0519692	DDM1	ATP-dependent DNA helicase DDM1	GO:0000786,GO:0003677,GO:0004003,GO:0005524,GO:0005634,GO:0006344,GO:0006346,GO:0006349,GO:0009294,GO:0016887,GO:0032197,GO:0044030,GO:0051574,GO:0090241	nucleosome|DNA binding|ATP-dependent DNA helicase activity|ATP binding|nucleus|maintenance of chromatin silencing|methylation-dependent chromatin silencing|regulation of gene expression by genetic imprinting|DNA mediated transformation|ATPase activity|transposition, RNA-mediated|regulation of DNA methylation|positive regulation of histone H3-K9 methylation|negative regulation of histone H4 acetyl…
LOC103401168	0	0	0	0	0	0	At2g25737	sulfite exporter TauE/SafE family protein 3-like	GO:0016021	integral component of membrane
LOC103401169	14.4825	13.1885	13.6578	9.75204	7.52714	9.99161	RNU1	U1 small nuclear ribonucleoprotein 70 kDa	GO:0000243,GO:0000398,GO:0003729,GO:0005634,GO:0005685,GO:0016607,GO:0030619	commitment complex|mRNA splicing, via spliceosome|mRNA binding|nucleus|U1 snRNP|nuclear speck|U1 snRNA binding	path:mdm03040	Spliceosome
LOC103401170	0	0	0	0	0	0	PERK4	proline-rich receptor-like protein kinase PERK4
LOC103401171	3.13229	0.882808	2.23349	2.39985	2.09783	1.12249		uncharacterized LOC103401171
LOC103401172	0.280842	0.0676381	0.157362	0.652096	0.229438	0.329855	At5g07610	F-box protein At5g07610-like
LOC103401174	0.491916	0.541934	0.315304	0.211235	0	0.29553		uncharacterized LOC103401174
LOC103401175	13.9233	14.0339	14.6961	16.2706	11.7666	13.0905	At3g50690	acidic leucine-rich nuclear phosphoprotein 32-related protein-like	GO:0005634,GO:0042393	nucleus|histone binding
LOC103401176	15.0197	19.1708	17.5677	18.6897	22.5155	15.6921		uncharacterized LOC103401176
LOC103401177	5.69749	7.54435	7.93261	5.52066	4.98648	5.88119	PBRP1	plant-specific TFIIB-related protein 1	GO:0000182,GO:0005634,GO:0006355,GO:0009527,GO:0009707,GO:0017025,GO:0046872,GO:0070897	rDNA binding|nucleus|regulation of transcription, DNA-templated|plastid outer membrane|chloroplast outer membrane|TBP-class protein binding|metal ion binding|transcription preinitiation complex assembly	path:mdm03022	Basal transcription factors
LOC103401178	0.0546118	0	0	0	0	0		uncharacterized LOC103401178
LOC103401179	0	0	0.0287735	0.0265341	0.0715212	0.0265601	PLT6	probable polyol transporter 6	GO:0005351,GO:0005355,GO:0005887,GO:0008645	carbohydrate:proton symporter activity|glucose transmembrane transporter activity|integral component of plasma membrane|hexose transmembrane transport
LOC103401180	6.38584	6.84866	6.35185	8.94044	7.91563	8.82131	At4g36680	pentatricopeptide repeat-containing protein At4g36680, mitochondrial
LOC103401181	21.4419	19.7215	19.478	16.9089	12.191	18.3207	U2AF65B	splicing factor U2af large subunit B	GO:0003723,GO:0005634,GO:0006397,GO:0008380	RNA binding|nucleus|mRNA processing|RNA splicing	path:mdm03040	Spliceosome
LOC103401182	0.0799248	0.0522917	0.303809	1.67934	0.333271	0.290881		cold-shock protein CS120-like
LOC103401184	0	0	0	0	0	0	CYP711A1	cytochrome P450 711A1-like	GO:0004497,GO:0005506,GO:0009926,GO:0009934,GO:0009963,GO:0010223,GO:0016021,GO:0016117,GO:0016705,GO:0020037	monooxygenase activity|iron ion binding|auxin polar transport|regulation of meristem structural organization|positive regulation of flavonoid biosynthetic process|secondary shoot formation|integral component of membrane|carotenoid biosynthetic process|oxidoreductase activity, acting on paired donors, with incorporation or reduction of molecular oxygen|heme binding
LOC103401188	0	0	0.0305146	0	0	0	RFC3	uncharacterized LOC103401188	GO:0003677,GO:0005524,GO:0005634,GO:0005663,GO:0006261	DNA binding|ATP binding|nucleus|DNA replication factor C complex|DNA-dependent DNA replication	path:mdm03030,path:mdm03420,path:mdm03430	DNA replication|Nucleotide excision repair|Mismatch repair
LOC103401189	0	0	0.101521	0	0	0	PPA1	soluble inorganic pyrophosphatase 1-like	GO:0000287,GO:0004427,GO:0005634,GO:0005737,GO:0005829,GO:0006796,GO:0019915	magnesium ion binding|inorganic diphosphatase activity|nucleus|cytoplasm|cytosol|phosphate-containing compound metabolic process|lipid storage	path:mdm00190	Oxidative phosphorylation
LOC103401191	0	0.0423358	0.0494161	0	0	0		putative glucose-6-phosphate 1-epimerase	GO:0005975,GO:0030246,GO:0047938	carbohydrate metabolic process|carbohydrate binding|glucose-6-phosphate 1-epimerase activity	path:mdm00010	Glycolysis / Gluconeogenesis
LOC103401193	0.0236525	0.0231195	0	0.0247952	0	0	SYP112	syntaxin-112-like	GO:0000149,GO:0005484,GO:0005634,GO:0005886,GO:0006886,GO:0006887,GO:0006906,GO:0009409,GO:0012505,GO:0016021,GO:0031201,GO:0048278	SNARE binding|SNAP receptor activity|nucleus|plasma membrane|intracellular protein transport|exocytosis|vesicle fusion|response to cold|endomembrane system|integral component of membrane|SNARE complex|vesicle docking	path:mdm04130	SNARE interactions in vesicular transport
LOC103401197	0.0179276	0.0344926	0	0	0	0	utp22	nucleolar protein 6	GO:0005634,GO:0005730,GO:0006364,GO:0006409,GO:0030490,GO:0030515,GO:0032040,GO:0032545,GO:0034456	nucleus|nucleolus|rRNA processing|tRNA export from nucleus|maturation of SSU-rRNA|snoRNA binding|small-subunit processome|CURI complex|UTP-C complex	path:mdm03008	Ribosome biogenesis in eukaryotes
LOC103401199	18.0142	18.0117	17.0247	19.8576	17.5851	20.6404	VPS39	vacuolar sorting protein 39
LOC103401200	0	0	0	0.0341499	0	0	At2g18193	AAA-ATPase At2g18193-like	GO:0005524,GO:0005783,GO:0016021,GO:0016887	ATP binding|endoplasmic reticulum|integral component of membrane|ATPase activity
LOC103401202	0	0	0	0	0	0		uncharacterized LOC103401202
LOC103401207	0.758223	0.513931	0.85692	1.70393	1.85269	1.67475	BZIP53	bZIP transcription factor 44-like	GO:0003700,GO:0005634,GO:0006971,GO:0009267,GO:0043565,GO:0044212,GO:0045735,GO:0045893,GO:0046982,GO:2000693	DNA-binding transcription factor activity|nucleus|hypotonic response|cellular response to starvation|sequence-specific DNA binding|transcription regulatory region DNA binding|nutrient reservoir activity|positive regulation of transcription, DNA-templated|protein heterodimerization activity|positive regulation of seed maturation
LOC103401208	0.904073	0.991915	1.08417	1.02016	0.994455	0.927243	RPP13L4	disease resistance RPP13-like protein 4
LOC103401211	0.509573	0.244291	0.282407	0.257975	0.593287	0.264751	VQ29	uncharacterized LOC103401211	GO:0005634,GO:0009908,GO:0071456	nucleus|flower development|cellular response to hypoxia
LOC103401215	0.141529	0.0316812	0.0859778	0.0227452	0	0.0461408	KIN14Q	kinesin-like protein KIN-14Q	GO:0003777,GO:0005524,GO:0005871,GO:0005874,GO:0007018,GO:0008017,GO:0016887	microtubule motor activity|ATP binding|kinesin complex|microtubule|microtubule-based movement|microtubule binding|ATPase activity
LOC103401216	0	0	0	0	0	0	EMB2001	GTP-binding protein At2g22870-like	GO:0005525,GO:0046872	GTP binding|metal ion binding
LOC103401217	18.1049	14.7095	17.8004	13.725	18.0572	17.227	PLP3B	thioredoxin domain-containing protein PLP3A	GO:0000280,GO:0000911,GO:0005634,GO:0005737,GO:0005874,GO:0007000,GO:0043622,GO:0045454,GO:0048487,GO:0051211	nuclear division|cytokinesis by cell plate formation|nucleus|cytoplasm|microtubule|nucleolus organization|cortical microtubule organization|cell redox homeostasis|beta-tubulin binding|anisotropic cell growth
LOC103401218	0	0	0	0	0.039417	0.0442372	TRG-31	probable aquaporin PIP-type 7a	GO:0005886,GO:0015267,GO:0016021	plasma membrane|channel activity|integral component of membrane
LOC103401220	1.09332	0.421649	0.976408	4.00817	2.73314	2.88524	PPD2	psbP domain-containing protein 2, chloroplastic	GO:0005509,GO:0009507,GO:0009543,GO:0009579,GO:0009654,GO:0015979,GO:0019898	calcium ion binding|chloroplast|chloroplast thylakoid lumen|thylakoid|photosystem II oxygen evolving complex|photosynthesis|extrinsic component of membrane
LOC103401223	33.8752	35.961	34.8678	27.5903	27.1983	28.6954	APP1	aminopeptidase P1	GO:0004177,GO:0005737,GO:0005783,GO:0005829,GO:0005886,GO:0008270,GO:0009926,GO:0010013,GO:0030145,GO:0031090,GO:0070006	aminopeptidase activity|cytoplasm|endoplasmic reticulum|cytosol|plasma membrane|zinc ion binding|auxin polar transport|N-1-naphthylphthalamic acid binding|manganese ion binding|organelle membrane|metalloaminopeptidase activity
LOC103401224	15.4301	14.8984	13.9378	22.9434	20.193	15.2676	At4g36750	probable NAD(P)H dehydrogenase (quinone) FQR1-like 2	GO:0003955,GO:0005886,GO:0010181,GO:0055114	NAD(P)H dehydrogenase (quinone) activity|plasma membrane|FMN binding|oxidation-reduction process	path:mdm00130	Ubiquinone and other terpenoid-quinone biosynthesis
LOC103401225	39.4532	35.5003	36.5114	38.7314	47.9709	41.8697	smd2	probable small nuclear ribonucleoprotein Sm D2	GO:0000387,GO:0000395,GO:0000974,GO:0005634,GO:0005681,GO:0005682,GO:0005685,GO:0005686,GO:0046540,GO:0071004,GO:0071013,GO:0071014	spliceosomal snRNP assembly|mRNA 5'-splice site recognition|Prp19 complex|nucleus|spliceosomal complex|U5 snRNP|U1 snRNP|U2 snRNP|U4/U6 x U5 tri-snRNP complex|U2-type prespliceosome|catalytic step 2 spliceosome|post-mRNA release spliceosomal complex	path:mdm03040	Spliceosome
LOC103401226	0	0	0	0	0	0	ATHB-40	homeobox-leucine zipper protein ATHB-40-like	GO:0003700,GO:0005634,GO:0009733,GO:0043565	DNA-binding transcription factor activity|nucleus|response to auxin|sequence-specific DNA binding
LOC103401229	46.4367	35.9113	49.623	27.6708	29.2453	30.4177	At2g18193	AAA-ATPase At2g18193-like	GO:0005524,GO:0005783,GO:0016021,GO:0016887	ATP binding|endoplasmic reticulum|integral component of membrane|ATPase activity
LOC103401235	1.13287	1.17779	0.337093	0.383346	0.500075	0.1695		uncharacterized LOC103401235
LOC103401236	55.8077	52.5874	56.2908	56.3794	62.1092	59.2667	RCE1	NEDD8-conjugating enzyme Ubc12-like	GO:0005524,GO:0009733,GO:0019788,GO:0045116	ATP binding|response to auxin|NEDD8 transferase activity|protein neddylation	path:mdm04120	Ubiquitin mediated proteolysis
LOC103401240	0.0232483	0.0677442	0.0262289	0.193652	0.438506	0.0491122	At2g18193	AAA-ATPase At2g18193-like	GO:0005524,GO:0005783,GO:0016021,GO:0016887	ATP binding|endoplasmic reticulum|integral component of membrane|ATPase activity
LOC103401241	16.8122	16.0857	21.3562	24.371	28.59	20.8061	RMA1H1	E3 ubiquitin-protein ligase RNF185-like	GO:0004842,GO:0005789,GO:0006970,GO:0009409,GO:0009414,GO:0009611,GO:0009723,GO:0016021,GO:0016567,GO:0043161,GO:0046872	ubiquitin-protein transferase activity|endoplasmic reticulum membrane|response to osmotic stress|response to cold|response to water deprivation|response to wounding|response to ethylene|integral component of membrane|protein ubiquitination|proteasome-mediated ubiquitin-dependent protein catabolic process|metal ion binding	path:mdm04141	Protein processing in endoplasmic reticulum
LOC103401242	0.0540392	0.0525381	0.0611188	0.416784	0.543701	0.754242	GATL1	probable galacturonosyltransferase-like 1	GO:0005783,GO:0005789,GO:0005794,GO:0010051,GO:0010417,GO:0016021,GO:0032504,GO:0045489,GO:0047262,GO:0048366,GO:0052386	endoplasmic reticulum|endoplasmic reticulum membrane|Golgi apparatus|xylem and phloem pattern formation|glucuronoxylan biosynthetic process|integral component of membrane|multicellular organism reproduction|pectin biosynthetic process|polygalacturonate 4-alpha-galacturonosyltransferase activity|leaf development|cell wall thickening
LOC103401243	0	0	0	0.990633	0.375131	0.451386	YPQ1	probable vacuolar amino acid transporter YPQ1	GO:0015174,GO:0034488,GO:0071627	basic amino acid transmembrane transporter activity|basic amino acid transmembrane export from vacuole|integral component of fungal-type vacuolar membrane
LOC103401244	0	0	0	0	0	0	CML41	probable calcium-binding protein CML41	GO:0005509,GO:0005634,GO:0019722	calcium ion binding|nucleus|calcium-mediated signaling	path:mdm04626	Plant-pathogen interaction
LOC103401247	0.625361	0.80939	0.564537	0.518877	0.696125	0.300781	LYK4	lysM domain receptor-like kinase 4
LOC103401249	2.90152	2.46971	2.26193	2.05833	1.1407	2.70707	BLH2	BEL1-like homeodomain protein 2	GO:0003677,GO:0003700,GO:0005634,GO:0009965	DNA binding|DNA-binding transcription factor activity|nucleus|leaf morphogenesis
LOC103401250	2.62344	2.54725	2.61248	2.59603	1.8768	2.85936	SUVR5	histone-lysine N-methyltransferase SUVR5	GO:0003700,GO:0005634,GO:0005694,GO:0006338,GO:0006342,GO:0008270,GO:0018024,GO:0034968,GO:0043565,GO:1900109	DNA-binding transcription factor activity|nucleus|chromosome|chromatin remodeling|chromatin silencing|zinc ion binding|histone-lysine N-methyltransferase activity|histone lysine methylation|sequence-specific DNA binding|regulation of histone H3-K9 dimethylation
LOC103401251	92.2734	81.1741	85.0254	199.672	252.829	172.505	RPL30	60S ribosomal protein L30-like	GO:0003723,GO:0003735,GO:0005840,GO:0006412	RNA binding|structural constituent of ribosome|ribosome|translation	path:mdm03010	Ribosome
LOC103401252	0.0852782	0.326047	0.0953605	0.701799	0.236231	0.612083		uncharacterized LOC103401252
LOC103401253	0.977282	0.424009	0.561845	0.539662	0.112432	0.440413	At3g50780	BTB/POZ domain-containing protein At3g50780-like	GO:0016567	protein ubiquitination
LOC103401254	0	0	0	0	0	0		uncharacterized LOC103401254
LOC103401256	0.326008	0.132955	0.126898	0.169168	0.0704384	0.183148	PCMP-E28	pentatricopeptide repeat-containing protein At2g22410, mitochondrial-like
LOC103401257	37.2233	24.104	30.0783	20.9332	6.57624	12	PSBO	oxygen-evolving enhancer protein 1, chloroplastic	GO:0009535,GO:0009654,GO:0010207,GO:0010242,GO:0042549	chloroplast thylakoid membrane|photosystem II oxygen evolving complex|photosystem II assembly|oxygen evolving activity|photosystem II stabilization	path:mdm00195	Photosynthesis
LOC103401258	1.84212	1.40773	1.13799	1.31314	1.54423	0.533009	COR413PM2	cold-regulated 413 plasma membrane protein 2	GO:0005774,GO:0005886,GO:0016021	vacuolar membrane|plasma membrane|integral component of membrane
LOC103401259	0.163091	0.608654	0.67439	0.170461	0.143096	0.20851	At5g66560	BTB/POZ domain-containing protein At5g66560-like	GO:0005886,GO:0016567	plasma membrane|protein ubiquitination
LOC103401260	8.41861	10.9283	11.5151	4.46504	3.56288	4.4106		protein HGV2-like
LOC103401261	2.10711	2.13542	2.42428	1.8376	2.75732	2.04144		uncharacterized LOC103401261
LOC103401262	1.86577	1.699	0.98387	2.38045	1.48904	1.31962		uncharacterized LOC103401262
LOC103401268	0.228679	0.314399	0.440087	0.359096	0.244633	0.204653	PCMP-E43	putative pentatricopeptide repeat-containing protein At3g47840
LOC103401270	4.07359	4.81638	7.07023	3.22398	3.92613	2.68169	At2g23790	calcium uniporter protein 2, mitochondrial	GO:0005262,GO:0005743,GO:0015292,GO:0016021,GO:0051560	calcium channel activity|mitochondrial inner membrane|uniporter activity|integral component of membrane|mitochondrial calcium ion homeostasis
LOC103401273	0	0	0	0	0	0		uncharacterized LOC103401273
LOC103401274	0	0	0	0	0	0	NFP	serine/threonine receptor-like kinase NFP	GO:0002237,GO:0004713,GO:0005524,GO:0005775,GO:0005886,GO:0006486,GO:0006952,GO:0009877,GO:0016021,GO:1900150,GO:1902290	response to molecule of bacterial origin|protein tyrosine kinase activity|ATP binding|vacuolar lumen|plasma membrane|protein glycosylation|defense response|nodulation|integral component of membrane|regulation of defense response to fungus|positive regulation of defense response to oomycetes
LOC103401278	10.4316	5.97924	5.93813	6.73451	9.00829	13.0846	LPPE2	lipid phosphate phosphatase epsilon 2, chloroplastic	GO:0006487,GO:0006651,GO:0008195,GO:0008610,GO:0009507,GO:0009706,GO:0030176,GO:0047874	protein N-linked glycosylation|diacylglycerol biosynthetic process|phosphatidate phosphatase activity|lipid biosynthetic process|chloroplast|chloroplast inner membrane|integral component of endoplasmic reticulum membrane|dolichyldiphosphatase activity	path:mdm00510	N-Glycan biosynthesis
LOC103401282	0.437561	0.248499	0.178165	0.392958	0.260468	0.373633	PCMP-E85	pentatricopeptide repeat-containing protein At3g50420
LOC103401283	4.75325	3.75603	3.20912	3.39287	2.32424	3.11994		uncharacterized LOC103401283
LOC103401284	20.4006	22.7972	23.0861	26.4724	24.3989	26.0905	ETR1	ethylene receptor	GO:0000155,GO:0005524,GO:0005789,GO:0016021,GO:0038199,GO:0046872,GO:0051740	phosphorelay sensor kinase activity|ATP binding|endoplasmic reticulum membrane|integral component of membrane|ethylene receptor activity|metal ion binding|ethylene binding	path:mdm04016,path:mdm04075	MAPK signaling pathway - plant|Plant hormone signal transduction
LOC103401285	6.91786	5.60948	5.58372	22.1063	24.2939	35.9174	MAN7	mannan endo-1,4-beta-mannosidase 7	GO:0005576,GO:0009828,GO:0009845,GO:0010047,GO:0016985,GO:0046355,GO:0071944,GO:1990059	extracellular region|plant-type cell wall loosening|seed germination|fruit dehiscence|mannan endo-1,4-beta-mannosidase activity|mannan catabolic process|cell periphery|fruit valve development	path:mdm00051	Fructose and mannose metabolism
LOC103401286	4.72398	2.28737	2.58518	2.7998	2.90242	6.45103	SABP2	salicylic acid-binding protein 2-like	GO:0009862,GO:0016298,GO:0080031	systemic acquired resistance, salicylic acid mediated signaling pathway|lipase activity|methyl salicylate esterase activity
LOC103401288	19.1535	17.9927	20.4335	21.5261	25.3928	23.1577	RTNLB11	reticulon-like protein B11	GO:0005789,GO:0016021	endoplasmic reticulum membrane|integral component of membrane
LOC103401289	11.3635	8.8431	8.77979	15.0541	8.41056	14.0004	TIC21	protein TIC 21, chloroplastic	GO:0006875,GO:0009507,GO:0009706,GO:0009941,GO:0016021,GO:0042803,GO:0045037	cellular metal ion homeostasis|chloroplast|chloroplast inner membrane|chloroplast envelope|integral component of membrane|protein homodimerization activity|protein import into chloroplast stroma
LOC103401290	0.120647	0.0466267	0	0	0.0679143	0.0253257	Bp10	L-ascorbate oxidase homolog	GO:0005507,GO:0005576,GO:0016491	copper ion binding|extracellular region|oxidoreductase activity
LOC103401291	0.700214	0.584757	0.596864	0.375699	0.428966	0.639694	PCMP-H5	pentatricopeptide repeat-containing protein At4g37170
LOC103401294	2.76165	6.22887	5.30054	10.3031	9.05165	12.2588	FH1	formin-like protein 1	GO:0003779,GO:0005618,GO:0005886,GO:0016020,GO:0016021,GO:0030036,GO:0045010,GO:0051015,GO:0051016	actin binding|cell wall|plasma membrane|membrane|integral component of membrane|actin cytoskeleton organization|actin nucleation|actin filament binding|barbed-end actin filament capping
LOC103401295	5.56674	3.14379	3.5898	3.85423	3.10885	3.16852		uncharacterized LOC103401295
LOC103401296	40.8363	41.8132	39.2497	28.7275	24.8038	34.8066		acyl-coenzyme A thioesterase 9, mitochondrial-like
LOC103401297	7.70993	7.02962	6.27495	3.89825	4.21902	4.68544	MTK	methylthioribose kinase	GO:0005524,GO:0005829,GO:0019509,GO:0042802,GO:0046522,GO:0071281,GO:0071369,GO:0071732	ATP binding|cytosol|L-methionine salvage from methylthioadenosine|identical protein binding|S-methyl-5-thioribose kinase activity|cellular response to iron ion|cellular response to ethylene stimulus|cellular response to nitric oxide	path:mdm00270	Cysteine and methionine metabolism
LOC103401299	0.322088	0.387584	0.245021	0.310236	0.451307	0.34766	REV1	DNA repair protein REV1	GO:0003684,GO:0003887,GO:0005634,GO:0006974,GO:0010224,GO:0042276,GO:0046872	damaged DNA binding|DNA-directed DNA polymerase activity|nucleus|cellular response to DNA damage stimulus|response to UV-B|error-prone translesion synthesis|metal ion binding
LOC103401300	42.5591	46.5268	41.8772	62.2445	54.1369	40.2341	MTK	methylthioribose kinase-like	GO:0005524,GO:0005829,GO:0019509,GO:0042802,GO:0046522,GO:0071281,GO:0071369,GO:0071732	ATP binding|cytosol|L-methionine salvage from methylthioadenosine|identical protein binding|S-methyl-5-thioribose kinase activity|cellular response to iron ion|cellular response to ethylene stimulus|cellular response to nitric oxide	path:mdm00270	Cysteine and methionine metabolism
LOC103401301	36.5022	31.7661	31.1441	33.687	39.826	36.4373	LIP1	triacylglycerol lipase 1	GO:0004806,GO:0005615,GO:0016042,GO:0016298,GO:0044255	triglyceride lipase activity|extracellular space|lipid catabolic process|lipase activity|cellular lipid metabolic process	path:mdm00100	Steroid biosynthesis
LOC103401302	0	0	0	0	0	0		uncharacterized LOC103401302	GO:0008237,GO:0046872	metallopeptidase activity|metal ion binding
LOC103401307	0.409078	0.503803	0.682869	0.336782	0.43149	0.599124	BHLH113	transcription factor bHLH113-like	GO:0001228,GO:0003677,GO:0003700,GO:0005634,GO:0006355,GO:0046983	DNA-binding transcription activator activity, RNA polymerase II-specific|DNA binding|DNA-binding transcription factor activity|nucleus|regulation of transcription, DNA-templated|protein dimerization activity
LOC103401308	10.0714	14.3849	8.04549	46.5186	28.7797	42.0824	FUC95A	alpha-L-fucosidase 2-like	GO:0004560,GO:0010383,GO:0047513,GO:0048046	alpha-L-fucosidase activity|cell wall polysaccharide metabolic process|1,2-alpha-L-fucosidase activity|apoplast	path:mdm00511	Other glycan degradation
LOC103401310	2.31749	1.41338	1.85537	1.93635	1.73591	2.66801	FUC95A	alpha-L-fucosidase 2	GO:0004560,GO:0010383,GO:0047513,GO:0048046	alpha-L-fucosidase activity|cell wall polysaccharide metabolic process|1,2-alpha-L-fucosidase activity|apoplast	path:mdm00511	Other glycan degradation
LOC103401311	0.367705	0.352504	0.164184	0.305561	0.102664	0.341552		uncharacterized LOC103401311
LOC103401312	0.138476	0.214432	0.0311509	0.171931	0.104488	0.0585678	ZFP7	zinc finger protein 7-like	GO:0003700,GO:0005634,GO:0006355,GO:0009738,GO:0009788,GO:0019760,GO:0043565,GO:0044212,GO:0046872,GO:0046982	DNA-binding transcription factor activity|nucleus|regulation of transcription, DNA-templated|abscisic acid-activated signaling pathway|negative regulation of abscisic acid-activated signaling pathway|glucosinolate metabolic process|sequence-specific DNA binding|transcription regulatory region DNA binding|metal ion binding|protein heterodimerization activity
LOC103401313	43.7089	48.6586	43.2726	46.883	52.4121	49.6184	GAMMACA1	gamma carbonic anhydrase 1, mitochondrial	GO:0004089,GO:0005739,GO:0005747,GO:0009853,GO:0031966,GO:0045271,GO:0046872,GO:0070207	carbonate dehydratase activity|mitochondrion|mitochondrial respiratory chain complex I|photorespiration|mitochondrial membrane|respiratory chain complex I|metal ion binding|protein homotrimerization
LOC103401314	28.5947	24.2539	28.6558	25.0232	28.0848	22.2325	TIP41L	TIP41-like protein	GO:0005829,GO:0007165,GO:0031929	cytosol|signal transduction|TOR signaling
LOC103401315	4.86232	5.52948	5.42666	5.83617	3.46907	5.35853		uncharacterized LOC103401315
LOC103401316	6.12852	6.25293	6.26957	5.03948	4.00144	4.35732	PRH	homeobox protein HAT3.1-like	GO:0003677,GO:0005634,GO:0006355,GO:0006952,GO:0046872	DNA binding|nucleus|regulation of transcription, DNA-templated|defense response|metal ion binding
LOC103401317	10.2151	8.25274	8.5825	6.6119	4.90163	5.68388	RS41	serine/arginine-rich splicing factor RS41-like	GO:0000381,GO:0000398,GO:0003723,GO:0003729,GO:0005681,GO:0008380,GO:0010445,GO:0016607,GO:0031053,GO:0045292	regulation of alternative mRNA splicing, via spliceosome|mRNA splicing, via spliceosome|RNA binding|mRNA binding|spliceosomal complex|RNA splicing|nuclear dicing body|nuclear speck|primary miRNA processing|mRNA cis splicing, via spliceosome	path:mdm03040	Spliceosome
LOC103401319	0.401164	0.333875	0.327358	0.20749	0.187558	0.247814	At5g66900	probable disease resistance protein At5g66900
LOC103401320	273.455	225.854	289.015	282.795	285.18	281.558	PPA4	soluble inorganic pyrophosphatase 4	GO:0000287,GO:0004427,GO:0005829,GO:0006796,GO:0046686	magnesium ion binding|inorganic diphosphatase activity|cytosol|phosphate-containing compound metabolic process|response to cadmium ion	path:mdm00190	Oxidative phosphorylation
LOC103401321	7.32081	7.49953	8.19871	6.66481	6.17318	7.83097	At5g66900	probable disease resistance protein At5g66900
LOC103401322	0	0.031732	0.0370051	0	0.0307816	0	At5g66910	probable disease resistance protein At5g66900
LOC103401328	98.7282	92.8962	97.1812	91.5186	106.005	96.3319	RER1B	protein RER1B	GO:0005783,GO:0005794,GO:0005801,GO:0006621,GO:0006890,GO:0030173	endoplasmic reticulum|Golgi apparatus|cis-Golgi network|protein retention in ER lumen|retrograde vesicle-mediated transport, Golgi to ER|integral component of Golgi membrane
LOC103401329	0	0	0	0	0	0		transcription termination factor 4, mitochondrial-like
LOC103401330	0	0	0	0.0401425	0	0.0810513	LIMYB	L10-interacting MYB domain-containing protein-like	GO:0005634	nucleus
LOC103401334	1.39741	2.0889	2.21578	0.481771	0.688532	0.638514	At5g66900	probable disease resistance protein At5g66900
LOC103401337	0.380937	0.309186	0.287542	0	0.151788	0.135611		transmembrane protein 53
LOC103401338	1.85076	1.64711	2.12272	1.35621	1.19697	1.62865	RLCK176	U-box domain-containing protein 33-like	GO:0004674,GO:0005524,GO:0045087	protein serine/threonine kinase activity|ATP binding|innate immune response
LOC103401339	10.7151	9.6523	10.2735	10.6251	7.23144	9.4611	dml1	protein misato homolog 1	GO:0005739	mitochondrion
LOC103401340	0.746664	1.67357	0.956884	1.98611	1.65813	0.804438	HHO5	transcription factor HHO5	GO:0003700,GO:0005634,GO:0005829,GO:0006355,GO:0010629,GO:0044212,GO:0048449,GO:0090701	DNA-binding transcription factor activity|nucleus|cytosol|regulation of transcription, DNA-templated|negative regulation of gene expression|transcription regulatory region DNA binding|floral organ formation|specification of plant organ identity
LOC103401341	1.72526	2.32188	1.88571	1.37303	2.23828	2.62558	LBD36	LOB domain-containing protein 36	GO:0006355,GO:0009954,GO:0009965,GO:0048441	regulation of transcription, DNA-templated|proximal/distal pattern formation|leaf morphogenesis|petal development
LOC103401342	9.42262	6.07316	7.52382	5.81923	6.0555	6.17081		50S ribosomal protein L25-like			path:mdm03010	Ribosome
LOC103401343	0.574352	0.70239	0.449325	0.207057	0.327512	0.498322	CYP40	peptidyl-prolyl cis-trans isomerase CYP40	GO:0003755,GO:0005737,GO:0005829,GO:0006457,GO:0010050,GO:0010582,GO:0051082	peptidyl-prolyl cis-trans isomerase activity|cytoplasm|cytosol|protein folding|vegetative phase change|floral meristem determinacy|unfolded protein binding
LOC103401346	0	0.0348254	0	0	0	0	MAPKKK5	mitogen-activated protein kinase kinase kinase 5-like	GO:0000187,GO:0004674,GO:0004709,GO:0005524,GO:0005737,GO:0005829,GO:0005886,GO:0006952,GO:0010200,GO:0023014,GO:0031098,GO:0032147,GO:0045088,GO:0046777,GO:0071323,GO:1900150,GO:2000071	activation of MAPK activity|protein serine/threonine kinase activity|MAP kinase kinase kinase activity|ATP binding|cytoplasm|cytosol|plasma membrane|defense response|response to chitin|signal transduction by protein phosphorylation|stress-activated protein kinase signaling cascade|activation of protein kinase activity|regulation of innate immune response|protein autophosphorylation|cellular respo…
LOC103401347	0	0	0	0	0	0	PPH	uncharacterized protein Mb2734-like	GO:0009507,GO:0009535,GO:0009570,GO:0015996,GO:0080124	chloroplast|chloroplast thylakoid membrane|chloroplast stroma|chlorophyll catabolic process|pheophytinase activity
LOC103401349	16.5302	18.1577	18.5794	16.8547	15.99	17.3006	CRK5	CDPK-related kinase 5	GO:0004674,GO:0005524,GO:0005886,GO:0046872	protein serine/threonine kinase activity|ATP binding|plasma membrane|metal ion binding
LOC103401350	0.639031	1.13752	0.885597	0.152545	0.13877	0.103325	At3g50520	phosphoglycerate mutase-like protein 4	GO:0016791	phosphatase activity	path:mdm00010,path:mdm00260	Glycolysis / Gluconeogenesis|Glycine, serine and threonine metabolism
LOC103401351	0	0.139995	0	0	0	0.101511	At3g50520	phosphoglycerate mutase-like protein 4	GO:0016791	phosphatase activity	path:mdm00010,path:mdm00260	Glycolysis / Gluconeogenesis|Glycine, serine and threonine metabolism
LOC103401355	18.5774	22.7683	21.1215	14.1138	8.68141	13.4025		uncharacterized LOC103401355
LOC103401356	27.8494	25.9227	27.7527	18.7549	15.876	18.7824		putative glucose-6-phosphate 1-epimerase	GO:0005975,GO:0030246,GO:0047938	carbohydrate metabolic process|carbohydrate binding|glucose-6-phosphate 1-epimerase activity	path:mdm00010	Glycolysis / Gluconeogenesis
LOC103401357	0.068379	0.0330138	0	0.0177397	0	0.0179563		uncharacterized LOC103401357
LOC103401358	6.3211	5.12427	2.39496	0.280125	1.17031	1.54241		uncharacterized LOC103401358
LOC103401361	0	0	0	0	0	0		extensin
LOC103401362	17.4714	17.4825	17.415	11.8874	11.9451	11.4557	KAS2	3-oxoacyl-[acyl-carrier-protein] synthase II, chloroplastic-like	GO:0004315,GO:0006633,GO:0006636,GO:0009507,GO:0009536,GO:0009570,GO:0009631,GO:0009793	3-oxoacyl-[acyl-carrier-protein] synthase activity|fatty acid biosynthetic process|unsaturated fatty acid biosynthetic process|chloroplast|plastid|chloroplast stroma|cold acclimation|embryo development ending in seed dormancy	path:mdm00061,path:mdm00780	Fatty acid biosynthesis|Biotin metabolism
LOC103401363	3.00504	3.05442	3.38544	3.01238	2.33024	2.86152		uncharacterized LOC103401363
LOC103401365	0	0	0	0	0	0.0239877	At3g27390	uncharacterized membrane protein At3g27390	GO:0005886,GO:0016021	plasma membrane|integral component of membrane
LOC103401366	3.32688	1.39303	2.44495	1.36375	1.62675	1.18431	SYP112	syntaxin-112	GO:0000149,GO:0005484,GO:0005634,GO:0005886,GO:0006886,GO:0006887,GO:0006906,GO:0009409,GO:0012505,GO:0016021,GO:0031201,GO:0048278	SNARE binding|SNAP receptor activity|nucleus|plasma membrane|intracellular protein transport|exocytosis|vesicle fusion|response to cold|endomembrane system|integral component of membrane|SNARE complex|vesicle docking	path:mdm04130	SNARE interactions in vesicular transport
LOC103401367	0	0	0	0	0	0		uncharacterized LOC103401367
LOC103401368	0	0	0	0	0	0	DTX48	protein DETOXIFICATION 49-like	GO:0000139,GO:0005381,GO:0005770,GO:0005794,GO:0006826,GO:0006855,GO:0006970,GO:0009408,GO:0009624,GO:0009646,GO:0009737,GO:0010015,GO:0015238,GO:0015297,GO:0015893,GO:0016021,GO:0017119,GO:0031902,GO:0043226,GO:0055072,GO:1905428	Golgi membrane|iron ion transmembrane transporter activity|late endosome|Golgi apparatus|iron ion transport|drug transmembrane transport|response to osmotic stress|response to heat|response to nematode|response to absence of light|response to abscisic acid|root morphogenesis|drug transmembrane transporter activity|antiporter activity|drug transport|integral component of membrane|Golgi transport c…
LOC103401369	0.966207	0.628222	0.725147	0.876945	0.911084	0.737616	CML30	calmodulin-like protein 1	GO:0005509,GO:0005739	calcium ion binding|mitochondrion	path:mdm04626	Plant-pathogen interaction
LOC103401372	7.50123	9.4829	7.17741	6.79142	3.83266	5.94693		uncharacterized LOC103401372
LOC103401375	9.46946	8.21491	10.4277	5.07395	2.83287	4.32993	RCCR	red chlorophyll catabolite reductase, chloroplastic	GO:0005737,GO:0005739,GO:0005829,GO:0009507,GO:0009535,GO:0009570,GO:0009814,GO:0009941,GO:0010363,GO:0015996,GO:0043067,GO:0051743	cytoplasm|mitochondrion|cytosol|chloroplast|chloroplast thylakoid membrane|chloroplast stroma|defense response, incompatible interaction|chloroplast envelope|regulation of plant-type hypersensitive response|chlorophyll catabolic process|regulation of programmed cell death|red chlorophyll catabolite reductase activity	path:mdm00860	Porphyrin and chlorophyll metabolism
LOC103401376	3.66069	3.1097	3.57852	4.9501	3.78888	6.2012		uncharacterized LOC103401376
LOC103401377	0	0	0	0	0	0	LAC11	laccase-11-like	GO:0005507,GO:0016722,GO:0046274,GO:0048046,GO:0052716	copper ion binding|oxidoreductase activity, oxidizing metal ions|lignin catabolic process|apoplast|hydroquinone:oxygen oxidoreductase activity
LOC103401378	6.57695	6.47539	7.88913	4.13111	3.84949	4.03002		CLK4-associating serine/arginine rich protein
LOC103401379	1.56301	0.699389	0.64877	0.135755	0.0349736	0.156356		zeaxanthin epoxidase, chloroplastic	GO:0009507,GO:0009540,GO:0009688,GO:0016020,GO:0071949	chloroplast|zeaxanthin epoxidase [overall] activity|abscisic acid biosynthetic process|membrane|FAD binding	path:mdm00906	Carotenoid biosynthesis
LOC103401380	0.763073	0.226047	0.550847	1.58378	0.533906	0.745635		uncharacterized LOC103401380
LOC103401381	12.408	14.3207	14.5757	15.0396	14.6801	13.7624	SPBC660.15	heterogeneous nuclear ribonucleoprotein A/B	GO:0003723,GO:0003730,GO:0005634,GO:0005654,GO:0005737,GO:0005849,GO:0006378,GO:0006379,GO:1990904	RNA binding|mRNA 3'-UTR binding|nucleus|nucleoplasm|cytoplasm|mRNA cleavage factor complex|mRNA polyadenylation|mRNA cleavage|ribonucleoprotein complex	path:mdm03015	mRNA surveillance pathway
LOC103401382	0.028845	0	0	0	0.026966	0.120449		uncharacterized LOC103401382	GO:0004806,GO:0005615,GO:0016042,GO:0046872	triglyceride lipase activity|extracellular space|lipid catabolic process|metal ion binding
LOC103401383	0	0	0	0	0	0	HEC1	transcription factor HEC2-like	GO:0003700,GO:0005634,GO:0006355,GO:0010468,GO:0010500,GO:0043565,GO:0045893,GO:0046983,GO:0048462	DNA-binding transcription factor activity|nucleus|regulation of transcription, DNA-templated|regulation of gene expression|transmitting tissue development|sequence-specific DNA binding|positive regulation of transcription, DNA-templated|protein dimerization activity|carpel formation
LOC103401384	0.686764	0.465432	0.697841	0	0.52039	0.218087	RALFL34	protein RALF-like 34	GO:0005179,GO:0005622,GO:0007267,GO:0009506,GO:0019722,GO:0048046	hormone activity|intracellular|cell-cell signaling|plasmodesma|calcium-mediated signaling|apoplast
LOC103401387	3.58293	3.84636	4.24799	3.13847	4.95902	4.66663	TULP5	tubby-like F-box protein 5	GO:0005929,GO:0035091,GO:0061512	cilium|phosphatidylinositol binding|protein localization to cilium
LOC103401388	0.0325243	0.00789249	0.0643734	0.0170455	0	0	Os01g0868300	DNA polymerase alpha catalytic subunit	GO:0001882,GO:0003688,GO:0003887,GO:0003896,GO:0005634,GO:0005658,GO:0006270,GO:0006272,GO:0006273,GO:0006303,GO:0009965,GO:0017076,GO:0046872,GO:0046982,GO:0051539,GO:1902975,GO:1902981	nucleoside binding|DNA replication origin binding|DNA-directed DNA polymerase activity|DNA primase activity|nucleus|alpha DNA polymerase:primase complex|DNA replication initiation|leading strand elongation|lagging strand elongation|double-strand break repair via nonhomologous end joining|leaf morphogenesis|purine nucleotide binding|metal ion binding|protein heterodimerization activity|4 iron, 4 s…	path:mdm03030	DNA replication
LOC103401389	0.409479	0.392952	0.48375	0.447733	0.445732	0.332111	NAPRT2	nicotinate phosphoribosyltransferase 2-like	GO:0004514,GO:0004516,GO:0005829,GO:0009435,GO:0019358,GO:0034355,GO:0046872	nicotinate-nucleotide diphosphorylase (carboxylating) activity|nicotinate phosphoribosyltransferase activity|cytosol|NAD biosynthetic process|nicotinate nucleotide salvage|NAD salvage|metal ion binding	path:mdm00760	Nicotinate and nicotinamide metabolism
LOC103401390	3.11553	2.34718	5.34857	0.691552	1.2317	0.866327	SPT	transcription factor SPATULA	GO:0003677,GO:0003700,GO:0005634,GO:0007623,GO:0009409,GO:0010114,GO:0010154,GO:0010187,GO:0046983,GO:0048440	DNA binding|DNA-binding transcription factor activity|nucleus|circadian rhythm|response to cold|response to red light|fruit development|negative regulation of seed germination|protein dimerization activity|carpel development
LOC103401391	7.19762	4.67505	4.40565	6.91904	6.28608	6.13192	PEP	flowering locus K homology domain-like	GO:0003723,GO:0005634,GO:0006396,GO:0009299,GO:0048367,GO:0048467,GO:0048577,GO:0048579	RNA binding|nucleus|RNA processing|mRNA transcription|shoot system development|gynoecium development|negative regulation of short-day photoperiodism, flowering|negative regulation of long-day photoperiodism, flowering
LOC103401393	8.48638	11.9168	11.8021	6.38764	6.92427	6.87077	At5g67130	PI-PLC X domain-containing protein At5g67130-like	GO:0005886,GO:0006629,GO:0008081,GO:0046658	plasma membrane|lipid metabolic process|phosphoric diester hydrolase activity|anchored component of plasma membrane
LOC103401394	0	0	0	0	0	0	At3g50280	protein ENHANCED PSEUDOMONAS SUSCEPTIBILTY 1-like	GO:0016747	transferase activity, transferring acyl groups other than amino-acyl groups
LOC103401397	22.33	18.5297	18.5047	15.2592	21.1386	17.8976	APC10	anaphase-promoting complex subunit 10			path:mdm04120	Ubiquitin mediated proteolysis
LOC103401398	21.3623	20.546	18.6362	19.6364	20.5826	23.0208	AP2	floral homeotic protein APETALA 2-like	GO:0003677,GO:0003700,GO:0005634,GO:0009908,GO:0010073,GO:0010093,GO:0030154,GO:0048316,GO:0048481	DNA binding|DNA-binding transcription factor activity|nucleus|flower development|meristem maintenance|specification of floral organ identity|cell differentiation|seed development|plant ovule development
LOC103401400	72.2777	61.2637	66.9329	67.475	70.1332	59.6486	SCE1	SUMO-conjugating enzyme SCE1	GO:0005524,GO:0005634,GO:0009737,GO:0009793,GO:0016925,GO:0019789,GO:0019900,GO:0061656	ATP binding|nucleus|response to abscisic acid|embryo development ending in seed dormancy|protein sumoylation|SUMO transferase activity|kinase binding|SUMO conjugating enzyme activity	path:mdm03013,path:mdm04120	RNA transport|Ubiquitin mediated proteolysis
LOC103401401	5.6428	5.95116	6.74432	8.88233	7.66704	7.07224	DUS1	tRNA-dihydrouridine(16/17) synthase [NAD(P)(+)]-like	GO:0006400,GO:0017150,GO:0050660,GO:0102263	tRNA modification|tRNA dihydrouridine synthase activity|flavin adenine dinucleotide binding|tRNA-dihydrouridine17 synthase activity
LOC103401403	68.9972	64.452	71.1124	65.8575	93.3831	78.3171	RER1A	protein RER1A-like	GO:0005783,GO:0005794,GO:0006621,GO:0006890,GO:0030173	endoplasmic reticulum|Golgi apparatus|protein retention in ER lumen|retrograde vesicle-mediated transport, Golgi to ER|integral component of Golgi membrane
LOC103401405	169.635	217.03	173.035	219.367	338.72	228.811	RD21C	cysteine proteinase COT44-like	GO:0004197,GO:0005615,GO:0005764,GO:0051603	cysteine-type endopeptidase activity|extracellular space|lysosome|proteolysis involved in cellular protein catabolic process
LOC103401407	3.96505	2.14403	2.2665	1.34075	0.635036	1.4359	PUB5	U-box domain-containing protein 5	GO:0004842,GO:0005634,GO:0005737	ubiquitin-protein transferase activity|nucleus|cytoplasm
LOC103401408	7.26453	9.01535	8.26339	8.86192	8.91497	7.03573	SKIP2	F-box protein SKIP2-like	GO:0004842,GO:0005634,GO:0005737,GO:0006511,GO:0019005,GO:0031146	ubiquitin-protein transferase activity|nucleus|cytoplasm|ubiquitin-dependent protein catabolic process|SCF ubiquitin ligase complex|SCF-dependent proteasomal ubiquitin-dependent protein catabolic process
LOC103401410	0	0	0	0.0356727	0	0	EB1C	microtubule-associated protein RP/EB family member 1C	GO:0005618,GO:0005634,GO:0005730,GO:0005815,GO:0005819,GO:0005874,GO:0005881,GO:0008017,GO:0009524,GO:0009652,GO:0030865,GO:0031110,GO:0035371,GO:0035372,GO:0051010,GO:0051225,GO:0051233,GO:0051301,GO:1904825	cell wall|nucleus|nucleolus|microtubule organizing center|spindle|microtubule|cytoplasmic microtubule|microtubule binding|phragmoplast|thigmotropism|cortical cytoskeleton organization|regulation of microtubule polymerization or depolymerization|microtubule plus-end|protein localization to microtubule|microtubule plus-end binding|spindle assembly|spindle midzone|cell division|protein localization …
LOC103401411	0.0415126	0.0539104	0.125353	0.0431384	0.0264797	0.014822	At4g37250	probable LRR receptor-like serine/threonine-protein kinase At4g37250	GO:0004674,GO:0005524,GO:0016021	protein serine/threonine kinase activity|ATP binding|integral component of membrane
LOC103401412	21.0834	23.59	20.5961	14.0895	10.7887	14.0113	MYB73	transcription factor MYB44-like	GO:0003700,GO:0005634,GO:0006355,GO:0009723,GO:0009737,GO:0009751,GO:0009753,GO:0010200,GO:0010929,GO:0019760,GO:0043565,GO:0044212,GO:0046686,GO:1901001	DNA-binding transcription factor activity|nucleus|regulation of transcription, DNA-templated|response to ethylene|response to abscisic acid|response to salicylic acid|response to jasmonic acid|response to chitin|positive regulation of auxin mediated signaling pathway|glucosinolate metabolic process|sequence-specific DNA binding|transcription regulatory region DNA binding|response to cadmium ion|n…
LOC103401416	0	0	0	0	0	0	At5g66900	probable disease resistance protein At5g66900
LOC103401420	0.325862	0.202625	0.407619	0.258626	0.143003	0.0599224	RPS6	disease resistance protein RPS6-like	GO:0006952,GO:0007165,GO:0043531	defense response|signal transduction|ADP binding
LOC103401430	5.45579	6.45547	6.15178	6.53776	5.31767	6.78708	CDC48	ATPase family AAA domain-containing protein 3C-like	GO:0005524,GO:0005634,GO:0005737,GO:0005829,GO:0005886,GO:0016236,GO:0016887,GO:0030433,GO:0030970,GO:0031593,GO:0034098,GO:0051228,GO:0071712,GO:0097352	ATP binding|nucleus|cytoplasm|cytosol|plasma membrane|macroautophagy|ATPase activity|ubiquitin-dependent ERAD pathway|retrograde protein transport, ER to cytosol|polyubiquitin modification-dependent protein binding|VCP-NPL4-UFD1 AAA ATPase complex|mitotic spindle disassembly|ER-associated misfolded protein catabolic process|autophagosome maturation
LOC103401436	0	0	0	0	0	0		uncharacterized LOC103401436
LOC103401439	0	0	0	0	0	0		uncharacterized LOC103401439	GO:0004806,GO:0005615,GO:0016042,GO:0046872	triglyceride lipase activity|extracellular space|lipid catabolic process|metal ion binding
LOC103401440	67.0874	62.2395	63.9671	63.5505	62.5371	71.0923	ITN1	ankyrin repeat-containing protein ITN1-like	GO:0005634,GO:0005886,GO:0009651,GO:0016020,GO:0016021,GO:0034613	nucleus|plasma membrane|response to salt stress|membrane|integral component of membrane|cellular protein localization
LOC103401441	1.06216	0.612339	1.89545	5.33801	2.97289	3.66286	RL3	protein RADIALIS-like 4	GO:0003677,GO:0003700,GO:0005634	DNA binding|DNA-binding transcription factor activity|nucleus
LOC103401443	1.4864	1.50072	1.20954	1.58516	1.27859	1.40229	CLF	histone-lysine N-methyltransferase CLF-like	GO:0003700,GO:0003727,GO:0005634,GO:0005677,GO:0006342,GO:0006349,GO:0009294,GO:0009908,GO:0009965,GO:0010228,GO:0016571,GO:0018024,GO:0030154,GO:0031519,GO:0045857,GO:0048586,GO:0070734	DNA-binding transcription factor activity|single-stranded RNA binding|nucleus|chromatin silencing complex|chromatin silencing|regulation of gene expression by genetic imprinting|DNA mediated transformation|flower development|leaf morphogenesis|vegetative to reproductive phase transition of meristem|histone methylation|histone-lysine N-methyltransferase activity|cell differentiation|PcG protein co…	path:mdm00310	Lysine degradation
LOC103401444	0	0	0	0	0	0	At3g50280	uncharacterized acetyltransferase At3g50280-like	GO:0016747	transferase activity, transferring acyl groups other than amino-acyl groups
LOC103401451	0	0	0	0	0	0	AtMg00310	uncharacterized LOC103401451	GO:0005739	mitochondrion
LOC103401452	6.38975	6.08935	8.40265	5.34325	5.01934	4.91876	CDC48D	ATPase family AAA domain-containing protein 3	GO:0005524,GO:0005634,GO:0005654,GO:0005730,GO:0005737,GO:0005794,GO:0005829,GO:0005856,GO:0005886,GO:0009524,GO:0016236,GO:0016887,GO:0030433,GO:0030970,GO:0031593,GO:0034098,GO:0045732,GO:0046686,GO:0051228,GO:0051301,GO:0071712,GO:0097352	ATP binding|nucleus|nucleoplasm|nucleolus|cytoplasm|Golgi apparatus|cytosol|cytoskeleton|plasma membrane|phragmoplast|macroautophagy|ATPase activity|ubiquitin-dependent ERAD pathway|retrograde protein transport, ER to cytosol|polyubiquitin modification-dependent protein binding|VCP-NPL4-UFD1 AAA ATPase complex|positive regulation of protein catabolic process|response to cadmium ion|mitotic spindl…
LOC103401454	22.5727	25.7428	24.3056	19.6365	16.4683	16.9361	IRX14	probable beta-1,4-xylosyltransferase IRX14	GO:0000139,GO:0005768,GO:0005794,GO:0005802,GO:0009834,GO:0010051,GO:0010154,GO:0010417,GO:0015018,GO:0016021,GO:0042285,GO:0045492,GO:0047517,GO:0048354,GO:0048367,GO:0071555	Golgi membrane|endosome|Golgi apparatus|trans-Golgi network|plant-type secondary cell wall biogenesis|xylem and phloem pattern formation|fruit development|glucuronoxylan biosynthetic process|galactosylgalactosylxylosylprotein 3-beta-glucuronosyltransferase activity|integral component of membrane|xylosyltransferase activity|xylan biosynthetic process|1,4-beta-D-xylan synthase activity|mucilage bio…
LOC103401458	0	0.0250664	0	0	0	0	CYP81E8	cytochrome P450 81E8-like	GO:0004497,GO:0005506,GO:0016021,GO:0016705,GO:0020037	monooxygenase activity|iron ion binding|integral component of membrane|oxidoreductase activity, acting on paired donors, with incorporation or reduction of molecular oxygen|heme binding
LOC103401460	0	0	0	0	0	0	MLO3	MLO-like protein 3	GO:0005516,GO:0006952,GO:0009607,GO:0016021	calmodulin binding|defense response|response to biotic stimulus|integral component of membrane
LOC103401462	1.95937	1.13406	1.69806	1.22737	0.663246	0.880009	ARF4	auxin response factor 4-like	GO:0003677,GO:0003700,GO:0005634,GO:0009734,GO:0010050,GO:0010158	DNA binding|DNA-binding transcription factor activity|nucleus|auxin-activated signaling pathway|vegetative phase change|abaxial cell fate specification
LOC103401463	0	0.014696	0.0171487	0	0	0		uncharacterized LOC103401463
LOC103401464	21.2551	32.4	27.0166	12.1633	11.3823	12.7081	IVD	isovaleryl-CoA dehydrogenase, mitochondrial	GO:0005739,GO:0006552,GO:0008470,GO:0050660,GO:1902196,GO:1902198	mitochondrion|leucine catabolic process|isovaleryl-CoA dehydrogenase activity|flavin adenine dinucleotide binding|isovaleryl-CoA(4-) catabolic process|3-methylbut-2-enoyl-CoA(4-) metabolic process	path:mdm00280	Valine, leucine and isoleucine degradation
LOC103401466	33.8854	25.5741	26.1474	27.7867	26.8057	31.1888	GRIK2	serine/threonine-protein kinase GRIK2
LOC103401467	112.8	78.6264	95.1935	66.2731	55.68	64.9425	GRIK1	serine/threonine-protein kinase GRIK1-like
LOC103401468	27.9622	34.7198	30.5254	45.6731	51.0197	40.3901	At5g60570	F-box/kelch-repeat protein At5g60570	GO:0005634	nucleus
LOC103401469	3.0306	1.95021	3.36524	3.18485	0.553094	1.06872	GH3.1	probable indole-3-acetic acid-amido synthetase GH3.1	GO:0009733,GO:0016874	response to auxin|ligase activity	path:mdm04075	Plant hormone signal transduction
LOC103401470	0	0	0	0.414411	2.18958	0.248727	At3g47570	probable LRR receptor-like serine/threonine-protein kinase At3g47570
LOC103401471	2.16709	3.47251	2.54179	4.052	8.44347	6.42835	LUL3	RNA-binding protein MEX3B-like	GO:0004842,GO:0046872	ubiquitin-protein transferase activity|metal ion binding
LOC103401473	0	0	0	0	0	0		monoacylglycerol lipase abhd6-A
LOC103401474	40.272	36.8274	35.0294	34.861	31.918	41.2851	NRAMP3	metal transporter Nramp3	GO:0005384,GO:0005773,GO:0005774,GO:0005794,GO:0006828,GO:0009506,GO:0009617,GO:0010043,GO:0015086,GO:0016021,GO:0042742,GO:0055072,GO:2000379	manganese ion transmembrane transporter activity|vacuole|vacuolar membrane|Golgi apparatus|manganese ion transport|plasmodesma|response to bacterium|response to zinc ion|cadmium ion transmembrane transporter activity|integral component of membrane|defense response to bacterium|iron ion homeostasis|positive regulation of reactive oxygen species metabolic process
LOC103401475	0.528387	0.256045	0.178766	0	0.0999947	0.112208		NDR1/HIN1-like protein 12
LOC103401477	7.56081	7.33225	8.25224	6.90445	6.15558	6.66796	SRFR1	suppressor of RPS4-RLD 1	GO:0005634,GO:0005737,GO:0005783,GO:0009816,GO:0016021,GO:0031348,GO:0032947,GO:0042742,GO:0043231,GO:0045892,GO:0048471	nucleus|cytoplasm|endoplasmic reticulum|defense response to bacterium, incompatible interaction|integral component of membrane|negative regulation of defense response|protein-containing complex scaffold activity|defense response to bacterium|intracellular membrane-bounded organelle|negative regulation of transcription, DNA-templated|perinuclear region of cytoplasm
LOC103401479	0.0277042	0	0	0.0574656	0	0.0291256		probable membrane-associated kinase regulator 1
LOC103401480	27.5905	27.9854	30.3993	28.5124	34.1841	29.4681	mag1	DNA-3-methyladenine glycosylase 1-like	GO:0003684,GO:0003905,GO:0005634,GO:0006285,GO:0006307,GO:0008725,GO:0032131,GO:0032993,GO:0043916,GO:0045007,GO:0052820,GO:0052821,GO:0052822	damaged DNA binding|alkylbase DNA N-glycosylase activity|nucleus|base-excision repair, AP site formation|DNA dealkylation involved in DNA repair|DNA-3-methyladenine glycosylase activity|alkylated DNA binding|protein-DNA complex|DNA-7-methylguanine glycosylase activity|depurination|DNA-1,N6-ethenoadenine N-glycosylase activity|DNA-7-methyladenine glycosylase activity|DNA-3-methylguanine glycosylas…	path:mdm03410	Base excision repair
LOC103401481	27.4896	27.9895	26.1841	23.4448	25.4598	28.9235	HD6	casein kinase II subunit alpha-2-like	GO:0004674,GO:0005524,GO:0005737,GO:0009648,GO:0009908,GO:0010229	protein serine/threonine kinase activity|ATP binding|cytoplasm|photoperiodism|flower development|inflorescence development	path:mdm03008,path:mdm04712	Ribosome biogenesis in eukaryotes|Circadian rhythm - plant
LOC103401482	409.262	348.338	368.209	414.912	502.26	421.123	At2g23090	uncharacterized protein At2g23090
LOC103401483	27.3106	18.6721	19.9453	12.3428	17.7117	14.0352	P4H9	probable prolyl 4-hydroxylase 9	GO:0004656,GO:0005506,GO:0005783,GO:0005789,GO:0005794,GO:0016021,GO:0018401,GO:0031418	procollagen-proline 4-dioxygenase activity|iron ion binding|endoplasmic reticulum|endoplasmic reticulum membrane|Golgi apparatus|integral component of membrane|peptidyl-proline hydroxylation to 4-hydroxy-L-proline|L-ascorbic acid binding	path:mdm00330	Arginine and proline metabolism
LOC103401484	9.93433	14.3971	15.0774	12.9789	15.3352	11.7788		molybdate-anion transporter-like
LOC103401486	4.08626	3.68989	4.75325	3.35421	2.47925	4.03493	P58A	uncharacterized LOC103401486	GO:0005788	endoplasmic reticulum lumen
LOC103401491	0.0465095	0	0.0261658	0.120744	0.0219666	0.0492309	SCL32	scarecrow-like protein 32	GO:0003700,GO:0005634,GO:0006355,GO:0043565	DNA-binding transcription factor activity|nucleus|regulation of transcription, DNA-templated|sequence-specific DNA binding
LOC103401493	3.88432	6.27415	4.84454	7.22315	4.24151	3.57983	LBD38	LOB domain-containing protein 37-like
LOC103401495	0	0	0	0	0	0	At5g38100	probable S-adenosylmethionine-dependent methyltransferase At5g38100	GO:0008168,GO:0046872	methyltransferase activity|metal ion binding
LOC103401496	0.837595	0.812183	1.21095	0.951324	0.638419	1.06522	RAB11A	uncharacterized LOC103401496	GO:0003924,GO:0005525,GO:0005886	GTPase activity|GTP binding|plasma membrane
LOC103401497	0.189717	0.060601	0	2.41565	1.28938	2.35471	SYP131	uncharacterized LOC103401497	GO:0000149,GO:0005484,GO:0005886,GO:0006886,GO:0006887,GO:0006906,GO:0012505,GO:0016021,GO:0031201,GO:0048278	SNARE binding|SNAP receptor activity|plasma membrane|intracellular protein transport|exocytosis|vesicle fusion|endomembrane system|integral component of membrane|SNARE complex|vesicle docking
LOC103401498	0.209984	0.36088	0.279903	0.0846803	0.116835	0	At3g06240	F-box/kelch-repeat protein At3g06240-like
LOC103401500	4.22188	5.79594	7.48163	7.61998	7.69094	7.18471	FH6	formin-like protein 6	GO:0003779,GO:0005618,GO:0005634,GO:0005730,GO:0005737,GO:0005819,GO:0005886,GO:0009524,GO:0016021	actin binding|cell wall|nucleus|nucleolus|cytoplasm|spindle|plasma membrane|phragmoplast|integral component of membrane
LOC103401501	4.31225	6.61384	5.65477	3.47698	5.42891	3.21009	CYCD5-1	cyclin-D5-1-like	GO:0000079,GO:0000278,GO:0000307,GO:0005634,GO:0005737,GO:0006468,GO:0007088,GO:0008284,GO:0016538,GO:0019901,GO:0042023,GO:0045787,GO:0051301	regulation of cyclin-dependent protein serine/threonine kinase activity|mitotic cell cycle|cyclin-dependent protein kinase holoenzyme complex|nucleus|cytoplasm|protein phosphorylation|regulation of mitotic nuclear division|positive regulation of cell proliferation|cyclin-dependent protein serine/threonine kinase regulator activity|protein kinase binding|DNA endoreduplication|positive regulation o…
LOC103401502	0.175531	0.241625	0.084488	0.286402	0.247206	0.407842	ACA2	calcium-transporting ATPase 2, plasma membrane-type-like	GO:0005388,GO:0005516,GO:0005524,GO:0005783,GO:0005789,GO:0005886,GO:0005887,GO:0015085,GO:0016020,GO:0046872,GO:0070588	calcium-transporting ATPase activity|calmodulin binding|ATP binding|endoplasmic reticulum|endoplasmic reticulum membrane|plasma membrane|integral component of plasma membrane|calcium ion transmembrane transporter activity|membrane|metal ion binding|calcium ion transmembrane transport
LOC103401503	57.6636	57.8911	64.0776	51.7509	58.3145	45.0437	VDAC2	mitochondrial outer membrane protein porin 2	GO:0005741,GO:0008308,GO:0015288,GO:0040008,GO:0046930	mitochondrial outer membrane|voltage-gated anion channel activity|porin activity|regulation of growth|pore complex
LOC103401504	0.395687	0.32655	0.316133	0.344142	0.264637	0.414926	RL1	protein RADIALIS-like 1	GO:0003677,GO:0003700,GO:0005634	DNA binding|DNA-binding transcription factor activity|nucleus
LOC103401505	3.88461	3.95798	5.12617	4.42722	5.4248	4.02098		uncharacterized LOC103401505
LOC103401506	6.15962	5.57676	7.73569	0.351196	0.409699	0.175884	AKN	adenylyl-sulfate kinase 1, chloroplastic-like	GO:0000103,GO:0004020,GO:0005524,GO:0009507,GO:0019344,GO:0070814	sulfate assimilation|adenylylsulfate kinase activity|ATP binding|chloroplast|cysteine biosynthetic process|hydrogen sulfide biosynthetic process	path:mdm00230,path:mdm00920	Purine metabolism|Sulfur metabolism
LOC103401509	1.04826	1.41008	1.375	0.822858	3.8304	0.932074	MLO6	MLO-like protein 2	GO:0005516,GO:0005886,GO:0009817,GO:0016021	calmodulin binding|plasma membrane|defense response to fungus, incompatible interaction|integral component of membrane
LOC103401510	4.83247	3.27556	3.62917	5.78028	6.27077	6.11498	AOP2	uncharacterized LOC103401510	GO:0016706,GO:0019761,GO:0046872	oxidoreductase activity, acting on paired donors, with incorporation or reduction of molecular oxygen, 2-oxoglutarate as one donor, and incorporation of one atom each of oxygen into both donors|glucosinolate biosynthetic process|metal ion binding
LOC103401511	4.12454	2.47871	3.02323	3.46008	2.8257	2.86298	LOG2	probable E3 ubiquitin-protein ligase LUL2	GO:0004842,GO:0005886,GO:0009737,GO:0046872,GO:0080144,GO:1901527	ubiquitin-protein transferase activity|plasma membrane|response to abscisic acid|metal ion binding|amino acid homeostasis|abscisic acid-activated signaling pathway involved in stomatal movement	path:mdm04120	Ubiquitin mediated proteolysis
LOC103401514	0	0	0	0	0	0		uncharacterized LOC103401514
LOC103401517	0.0863115	0	0.0729341	0.224664	0.20301	0.0683622	SR1IP1	BTB/POZ domain-containing protein SR1IP1-like	GO:0016567,GO:0042742	protein ubiquitination|defense response to bacterium
LOC103401519	2.48056	4.46681	3.27965	3.58069	5.47536	3.8974	DGK2	diacylglycerol kinase 2	GO:0003951,GO:0004143,GO:0005524,GO:0005622,GO:0006952,GO:0007205,GO:0009409,GO:0009611,GO:0016021,GO:0035556,GO:0046872,GO:0048364,GO:0048366	NAD+ kinase activity|diacylglycerol kinase activity|ATP binding|intracellular|defense response|protein kinase C-activating G protein-coupled receptor signaling pathway|response to cold|response to wounding|integral component of membrane|intracellular signal transduction|metal ion binding|root development|leaf development	path:mdm00561,path:mdm00564,path:mdm04070	Glycerolipid metabolism|Glycerophospholipid metabolism|Phosphatidylinositol signaling system
LOC103401520	30.7794	39.7439	35.9723	42.977	58.973	57.7849	At1g29470	probable methyltransferase PMT24	GO:0000139,GO:0005768,GO:0005794,GO:0005802,GO:0008757,GO:0016021,GO:0052546	Golgi membrane|endosome|Golgi apparatus|trans-Golgi network|S-adenosylmethionine-dependent methyltransferase activity|integral component of membrane|cell wall pectin metabolic process
LOC103401524	36.379	28.3715	29.3778	30.3586	30.5409	35.9222	DSP4	phosphoglucan phosphatase DSP4, amyloplastic	GO:0005634,GO:0005982,GO:0007623,GO:0008138,GO:0009501,GO:0019203	nucleus|starch metabolic process|circadian rhythm|protein tyrosine/serine/threonine phosphatase activity|amyloplast|carbohydrate phosphatase activity
LOC103401525	64.6221	53.7583	61.6812	52.1164	77.4445	60.848	ECH	Golgi apparatus membrane protein-like protein ECHIDNA	GO:0005768,GO:0005794,GO:0005802,GO:0007030,GO:0009306,GO:0009826,GO:0016192,GO:0030173,GO:0031901	endosome|Golgi apparatus|trans-Golgi network|Golgi organization|protein secretion|unidimensional cell growth|vesicle-mediated transport|integral component of Golgi membrane|early endosome membrane
LOC103401526	0	0	0	0	0	0	NET2D	protein NETWORKED 2D-like	GO:0003779,GO:0005886	actin binding|plasma membrane
LOC103401527	186.409	152.684	155.447	159.049	175.828	141.461	NIC1	nicotinamidase 1-like	GO:0008936,GO:0009737,GO:0019365	nicotinamidase activity|response to abscisic acid|pyridine nucleotide salvage
LOC103401528	0	0	0	0.0528098	0.0962336	0.106873	At5g51830	probable fructokinase-7	GO:0005524,GO:0005829,GO:0006000,GO:0006633,GO:0008865,GO:0016051,GO:0019200,GO:0019252,GO:0046686	ATP binding|cytosol|fructose metabolic process|fatty acid biosynthetic process|fructokinase activity|carbohydrate biosynthetic process|carbohydrate kinase activity|starch biosynthetic process|response to cadmium ion
LOC103401529	8.94905	9.36235	10.1145	9.22322	9.93348	11.0099		uncharacterized LOC103401529
LOC103401530	0.0819123	0.0989968	0.0691805	0.148843	0.0773398	0.151334	RBK1	receptor-like cytosolic serine/threonine-protein kinase RBK1
LOC103401531	6.02354	4.5528	5.14933	7.79169	7.7372	9.72451	SCL7	SCARECROW-LIKE protein 7	GO:0003677,GO:0005634	DNA binding|nucleus
LOC103401532	0	0	0.0202888	0	0	0	AIL6	AP2-like ethylene-responsive transcription factor AIL6	GO:0003677,GO:0003700,GO:0005634,GO:0009873	DNA binding|DNA-binding transcription factor activity|nucleus|ethylene-activated signaling pathway
LOC103401534	0	0	0	0.0295897	0	0	GT4	putative UDP-rhamnose:rhamnosyltransferase 1	GO:0016021,GO:0016758	integral component of membrane|transferase activity, transferring hexosyl groups
LOC103401535	4.8173	4.98626	4.24197	3.91231	4.41434	4.76392		uncharacterized LOC103401535
LOC103401536	0.183464	0.160294	0.130653	0.12144	0.201652	0.0518976	PCMP-H47	pentatricopeptide repeat-containing protein At5g65570
LOC103401537	2.95136	1.3239	1.2018	2.54053	2.86543	2.56799	Os07g0190000	probable 1-deoxy-D-xylulose-5-phosphate synthase 2, chloroplastic	GO:0008661,GO:0009228,GO:0009507,GO:0016114,GO:0046872,GO:0052865	1-deoxy-D-xylulose-5-phosphate synthase activity|thiamine biosynthetic process|chloroplast|terpenoid biosynthetic process|metal ion binding|1-deoxy-D-xylulose 5-phosphate biosynthetic process	path:mdm00730,path:mdm00900	Thiamine metabolism|Terpenoid backbone biosynthesis
LOC103401538	4.56522	3.28393	3.99811	4.36457	3.09845	4.52482	ALDH6B2	uncharacterized LOC103401538	GO:0004491,GO:0005507,GO:0005739,GO:0006210,GO:0006573,GO:0006574,GO:0006979,GO:0018478	methylmalonate-semialdehyde dehydrogenase (acylating) activity|copper ion binding|mitochondrion|thymine catabolic process|valine metabolic process|valine catabolic process|response to oxidative stress|malonate-semialdehyde dehydrogenase (acetylating) activity	path:mdm00280,path:mdm00410,path:mdm00562,path:mdm00640	Valine, leucine and isoleucine degradation|beta-Alanine metabolism|Inositol phosphate metabolism|Propanoate metabolism
LOC103401539	7.16444	10.5002	10.4399	7.67289	10.9085	8.53813	At5g03795	probable glycosyltransferase At5g03795	GO:0000139,GO:0006486,GO:0016021,GO:0016757,GO:0071555	Golgi membrane|protein glycosylation|integral component of membrane|transferase activity, transferring glycosyl groups|cell wall organization
LOC103401541	2.90097	3.61854	3.82129	9.09548	5.0196	8.48962	CYP90B1	cytochrome P450 90B1-like	GO:0004497,GO:0005506,GO:0005783,GO:0007275,GO:0009741,GO:0009753,GO:0009826,GO:0009867,GO:0010012,GO:0010268,GO:0010358,GO:0016021,GO:0016125,GO:0016132,GO:0016705,GO:0020037,GO:0048366,GO:0055114	monooxygenase activity|iron ion binding|endoplasmic reticulum|multicellular organism development|response to brassinosteroid|response to jasmonic acid|unidimensional cell growth|jasmonic acid mediated signaling pathway|steroid 22-alpha hydroxylase activity|brassinosteroid homeostasis|leaf shaping|integral component of membrane|sterol metabolic process|brassinosteroid biosynthetic process|oxidored…	path:mdm00905	Brassinosteroid biosynthesis
LOC103401542	36.5744	45.0367	45.3454	41.2897	49.3354	37.101		eukaryotic translation initiation factor 3 subunit J-A-like			path:mdm03013	RNA transport
LOC103401545	0	0	0	0	0	0	LECRK91	L-type lectin-domain containing receptor kinase IX.1
LOC103401547	0.0493143	0	0.11041	0	0	0.153788	SDR1	(+)-neomenthol dehydrogenase-like	GO:0005737,GO:0006952,GO:0047501,GO:0055114	cytoplasm|defense response|(+)-neomenthol dehydrogenase activity|oxidation-reduction process	path:mdm00902	Monoterpenoid biosynthesis
LOC103401548	10.2189	7.53575	8.30273	6.51214	5.28087	5.90405	mrm1	uncharacterized tRNA/rRNA methyltransferase slr1673	GO:0000963,GO:0003723,GO:0005739,GO:0008989,GO:0031167	mitochondrial RNA processing|RNA binding|mitochondrion|rRNA (guanine-N1-)-methyltransferase activity|rRNA methylation
LOC103401552	0	0	0	0	0	0	rglB	probable rhamnogalacturonate lyase B	GO:0000272,GO:0005576,GO:0030246,GO:0071555,GO:0102210	polysaccharide catabolic process|extracellular region|carbohydrate binding|cell wall organization|rhamnogalacturonan endolyase activity
LOC103401555	96.1752	106.984	95.57	113.941	109.191	123.239	SDH1-1	succinate dehydrogenase [ubiquinone] flavoprotein subunit 1, mitochondrial	GO:0000104,GO:0005524,GO:0005618,GO:0005739,GO:0005749,GO:0006099,GO:0006121,GO:0008177,GO:0009055,GO:0009061,GO:0045273,GO:0045282,GO:0050660,GO:0050897	succinate dehydrogenase activity|ATP binding|cell wall|mitochondrion|mitochondrial respiratory chain complex II, succinate dehydrogenase complex (ubiquinone)|tricarboxylic acid cycle|mitochondrial electron transport, succinate to ubiquinone|succinate dehydrogenase (ubiquinone) activity|electron transfer activity|anaerobic respiration|respiratory chain complex II|plasma membrane succinate dehydrog…	path:mdm00020,path:mdm00190	Citrate cycle (TCA cycle)|Oxidative phosphorylation
LOC103401556	0	0	0	0	0	0	NPF7.1	protein NRT1/ PTR FAMILY 7.1-like	GO:0005886,GO:0010167,GO:0015112,GO:0016021	plasma membrane|response to nitrate|nitrate transmembrane transporter activity|integral component of membrane
LOC103401557	13.6122	14.9803	15.027	14.7433	14.5835	17.0855	MOD1	enoyl-[acyl-carrier-protein] reductase [NADH], chloroplastic-like	GO:0004318,GO:0005507,GO:0005835,GO:0006633,GO:0009507,GO:0009570,GO:0009579,GO:0009941,GO:0016631	enoyl-[acyl-carrier-protein] reductase (NADH) activity|copper ion binding|fatty acid synthase complex|fatty acid biosynthetic process|chloroplast|chloroplast stroma|thylakoid|chloroplast envelope|enoyl-[acyl-carrier-protein] reductase activity	path:mdm00061,path:mdm00780	Fatty acid biosynthesis|Biotin metabolism
LOC103401560	5.12861	5.45423	4.45747	4.8741	4.48611	7.47812	CALS3	callose synthase 3	GO:0000148,GO:0003843,GO:0005886,GO:0006075,GO:0008360,GO:0016021,GO:0071555	1,3-beta-D-glucan synthase complex|1,3-beta-D-glucan synthase activity|plasma membrane|(1->3)-beta-D-glucan biosynthetic process|regulation of cell shape|integral component of membrane|cell wall organization
LOC103401561	11.0735	11.4642	11.1965	9.48137	7.45049	8.83338		protein SOGA3-like
LOC103401562	1.13646	0.950711	1.2805	0	0	0	PAP12	probable plastid-lipid-associated protein 12, chloroplastic	GO:0009507,GO:0009534,GO:0009535,GO:0009941,GO:0016020	chloroplast|chloroplast thylakoid|chloroplast thylakoid membrane|chloroplast envelope|membrane
LOC103401564	0.256064	0.314428	0.154018	0	0	0.107771	DDM1	ATP-dependent DNA helicase DDM1-like	GO:0000786,GO:0003677,GO:0004003,GO:0005524,GO:0005634,GO:0006344,GO:0006346,GO:0006349,GO:0009294,GO:0016887,GO:0032197,GO:0044030,GO:0051574,GO:0090241	nucleosome|DNA binding|ATP-dependent DNA helicase activity|ATP binding|nucleus|maintenance of chromatin silencing|methylation-dependent chromatin silencing|regulation of gene expression by genetic imprinting|DNA mediated transformation|ATPase activity|transposition, RNA-mediated|regulation of DNA methylation|positive regulation of histone H3-K9 methylation|negative regulation of histone H4 acetyl…
LOC103401567	13.6151	12.8982	11.9193	14.0351	11.5806	13.4037	HD16	casein kinase 1-like protein HD16	GO:0004674,GO:0005524,GO:0005634,GO:0005737,GO:0006897,GO:0009740,GO:0009908,GO:0010476,GO:0018105,GO:0018107,GO:0040008,GO:0048586	protein serine/threonine kinase activity|ATP binding|nucleus|cytoplasm|endocytosis|gibberellic acid mediated signaling pathway|flower development|gibberellin mediated signaling pathway|peptidyl-serine phosphorylation|peptidyl-threonine phosphorylation|regulation of growth|regulation of long-day photoperiodism, flowering
LOC103401568	0	0	0	0	0	0	CMT3	DNA (cytosine-5)-methyltransferase CMT3-like	GO:0003677,GO:0003682,GO:0003886,GO:0005634,GO:0006306,GO:0006342,GO:0010069,GO:0010216,GO:0010424,GO:0010425,GO:0045814,GO:0051567	DNA binding|chromatin binding|DNA (cytosine-5-)-methyltransferase activity|nucleus|DNA methylation|chromatin silencing|zygote asymmetric cytokinesis in embryo sac|maintenance of DNA methylation|DNA methylation on cytosine within a CG sequence|DNA methylation on cytosine within a CNG sequence|negative regulation of gene expression, epigenetic|histone H3-K9 methylation
LOC103401569	4.17129	4.61222	4.37381	3.68291	3.04469	3.31711	LARP1A	la-related protein 1A-like	GO:0000932,GO:0003723,GO:0005829,GO:0005844,GO:0006402,GO:0010286	P-body|RNA binding|cytosol|polysome|mRNA catabolic process|heat acclimation
LOC103401571	0.0210828	0.0208178	0	0	0	0		uncharacterized protein DDB_G0280579-like
LOC103401573	0	0	0	0	0	0	At1g51120	AP2/ERF and B3 domain-containing transcription factor At1g50680-like	GO:0003677,GO:0003700,GO:0005634,GO:0009873	DNA binding|DNA-binding transcription factor activity|nucleus|ethylene-activated signaling pathway
LOC103401575	0.171997	0.256926	0.198555	0.439084	0.225283	0.263626		uncharacterized LOC103401575
LOC103401579	5.47928	3.76467	2.67167	2.0683	2.30954	3.39425	LIN	putative E3 ubiquitin-protein ligase LIN-1	GO:0004842,GO:0009877	ubiquitin-protein transferase activity|nodulation
LOC103401581	0	0	0.0691546	0	0	0	FTIP7	FT-interacting protein 4-like	GO:0005886,GO:0016021	plasma membrane|integral component of membrane
LOC103401586	0	0	0	0	0	0	HRPN	peroxidase N-like	GO:0004601,GO:0005576,GO:0006979,GO:0020037,GO:0042744,GO:0046872	peroxidase activity|extracellular region|response to oxidative stress|heme binding|hydrogen peroxide catabolic process|metal ion binding	path:mdm00940	Phenylpropanoid biosynthesis
LOC103401588	15.8489	26.1954	14.2702	7.65774	13.8907	7.84242	RFS6	probable galactinol--sucrose galactosyltransferase 6	GO:0010325,GO:0047274	raffinose family oligosaccharide biosynthetic process|galactinol-sucrose galactosyltransferase activity	path:mdm00052	Galactose metabolism
LOC103401591	0	0	0	0	0	0		late embryogenesis abundant protein 7-like
LOC103401593	0	0	0	0	0	0		PKS-NRPS hybrid synthetase CHGG_01239-like
LOC103401594	1.2172	0.586123	0.839251	0.354444	0.426057	0.7147	N	TMV resistance protein N-like	GO:0005524,GO:0005737,GO:0007165,GO:0009626,GO:0043531	ATP binding|cytoplasm|signal transduction|plant-type hypersensitive response|ADP binding
LOC103401596	41	34.8129	26.9994	9.41084	9.36127	13.4137	At5g07610	F-box protein At5g07610-like
LOC103401602	0.270277	0.285893	0.462239	0.190616	0.325748	0.0728853	ZHD1	zinc-finger homeodomain protein 1-like	GO:0003677,GO:0005634,GO:0046872	DNA binding|nucleus|metal ion binding
LOC103401603	3.87596	3.70117	3.47183	5.23718	5.47396	5.46425		uncharacterized LOC103401603	GO:0000287,GO:0004450,GO:0006097,GO:0006099,GO:0006102,GO:0009507,GO:0051287	magnesium ion binding|isocitrate dehydrogenase (NADP+) activity|glyoxylate cycle|tricarboxylic acid cycle|isocitrate metabolic process|chloroplast|NAD binding	path:mdm00020,path:mdm00480,path:mdm04146	Citrate cycle (TCA cycle)|Glutathione metabolism|Peroxisome
LOC103401605	0	0	0	0	0	0	PERK4	proline-rich receptor-like protein kinase PERK4
LOC103401607	0.14964	0.0722326	0.147536	0.39187	0.281979	0.0984728	DRP4C	dynamin-related protein 4C	GO:0000266,GO:0003924,GO:0005525,GO:0005737,GO:0005874,GO:0008017,GO:0016020	mitochondrial fission|GTPase activity|GTP binding|cytoplasm|microtubule|microtubule binding|membrane
LOC103401608	119.144	124.658	124.025	294.262	303.658	289.928	GRF8	14-3-3-like protein GF14 kappa	GO:0005634,GO:0005737,GO:0019222,GO:0019904,GO:0050826	nucleus|cytoplasm|regulation of metabolic process|protein domain specific binding|response to freezing
LOC103401609	4.61085	6.28366	6.47885	2.07257	1.19489	1.42895	At4g40080	putative clathrin assembly protein At4g40080	GO:0005543,GO:0005794,GO:0005905,GO:0006897,GO:0030136	phospholipid binding|Golgi apparatus|clathrin-coated pit|endocytosis|clathrin-coated vesicle
LOC103401610	13.6065	18.9403	20.2694	21.0206	23.5361	17.6376	ATL54	RING-H2 finger protein ATL54-like	GO:0016021,GO:0016567,GO:0016740,GO:0046872	integral component of membrane|protein ubiquitination|transferase activity|metal ion binding
LOC103401611	14.8096	12.7062	13.7573	15.0903	13.0441	17.0846	pmr1	magnesium-transporting ATPase, P-type 1-like	GO:0000139,GO:0005388,GO:0005509,GO:0005524,GO:0005783,GO:0005789,GO:0005886,GO:0006874,GO:0008553,GO:0015410,GO:0016021,GO:0061454,GO:0070588,GO:0071421	Golgi membrane|calcium-transporting ATPase activity|calcium ion binding|ATP binding|endoplasmic reticulum|endoplasmic reticulum membrane|plasma membrane|cellular calcium ion homeostasis|proton-exporting ATPase activity, phosphorylative mechanism|manganese-transporting ATPase activity|integral component of membrane|release of sequestered calcium ion into cytosol by Golgi|calcium ion transmembrane …
LOC103401612	1.56663	1.75106	1.74775	0	0.0204926	0	exgA	probable glucan 1,3-beta-glucosidase A	GO:0000272,GO:0004338,GO:0005576,GO:0046872,GO:0071555	polysaccharide catabolic process|glucan exo-1,3-beta-glucosidase activity|extracellular region|metal ion binding|cell wall organization
LOC103401614	0.744058	0.46288	0.490764	0	0.0814791	0		uncharacterized LOC103401614
LOC103401615	9.31462	9.34913	9.19588	12.0956	10.4346	11.9502	At3g50690	acidic leucine-rich nuclear phosphoprotein 32-related protein-like	GO:0005634,GO:0042393	nucleus|histone binding
LOC103401616	1.51554	1.11016	0.938218	5.55768	5.88251	2.9672		uncharacterized LOC103401616
LOC103401617	6.3615	5.48429	4.93325	3.56625	2.3095	3.93379	At4g01020	ATP-dependent RNA helicase DEAH11, chloroplastic-like	GO:0000398,GO:0003723,GO:0005524,GO:0009507,GO:0034459,GO:0046872	mRNA splicing, via spliceosome|RNA binding|ATP binding|chloroplast|ATP-dependent 3'-5' RNA helicase activity|metal ion binding	path:mdm03040	Spliceosome
LOC103401623	0	0	0	0	0	0	PPME1	putative pectinesterase 63	GO:0005576,GO:0005783,GO:0005794,GO:0009505,GO:0009860,GO:0030599,GO:0042545,GO:0045330,GO:0045490,GO:0050829,GO:0090406	extracellular region|endoplasmic reticulum|Golgi apparatus|plant-type cell wall|pollen tube growth|pectinesterase activity|cell wall modification|aspartyl esterase activity|pectin catabolic process|defense response to Gram-negative bacterium|pollen tube	path:mdm00040	Pentose and glucuronate interconversions
LOC103401624	43.8153	58.9936	87.6497	66.771	80.3813	72.4841	ATHB-5	homeobox-leucine zipper protein ATHB-6-like	GO:0003700,GO:0005634,GO:0009737,GO:0009738,GO:0042803,GO:0043565,GO:0045893	DNA-binding transcription factor activity|nucleus|response to abscisic acid|abscisic acid-activated signaling pathway|protein homodimerization activity|sequence-specific DNA binding|positive regulation of transcription, DNA-templated
LOC103401625	0.781944	0.81136	1.07999	0.248461	0	0		uncharacterized LOC103401625
LOC103401626	21.1139	26.1804	22.6446	18.25	18.6454	21.1636	SPCC622.11	LMBR1 domain-containing protein 2 homolog A	GO:0000139,GO:0005737,GO:0005794,GO:0016021	Golgi membrane|cytoplasm|Golgi apparatus|integral component of membrane
LOC103401627	5.12565	7.45309	6.43564	5.24272	4.68949	4.32504	rio2	serine/threonine-protein kinase rio2-like	GO:0004672,GO:0004674,GO:0005524,GO:0005634,GO:0005829,GO:0030490,GO:0030688,GO:0046872	protein kinase activity|protein serine/threonine kinase activity|ATP binding|nucleus|cytosol|maturation of SSU-rRNA|preribosome, small subunit precursor|metal ion binding	path:mdm03008	Ribosome biogenesis in eukaryotes
LOC103401628	4.76284	5.23679	5.16864	4.52918	5.18271	4.31274		protein SCAI-like
LOC103401629	234.253	220.642	232.452	332.249	343.355	295.852		histone H3.3	GO:0000786,GO:0003677,GO:0005634,GO:0046982	nucleosome|DNA binding|nucleus|protein heterodimerization activity
LOC103401633	3.79598	2.4866	2.89969	7.67247	7.76825	9.6827		uncharacterized LOC103401633
LOC103401635	2.90212	2.49162	2.67615	2.15285	1.6201	3.49773		proteoglycan 4-like
LOC103401637	0	0	0	0	0	0	PPME1	putative pectinesterase 63	GO:0005576,GO:0005783,GO:0005794,GO:0009505,GO:0009860,GO:0030599,GO:0042545,GO:0045330,GO:0045490,GO:0050829,GO:0090406	extracellular region|endoplasmic reticulum|Golgi apparatus|plant-type cell wall|pollen tube growth|pectinesterase activity|cell wall modification|aspartyl esterase activity|pectin catabolic process|defense response to Gram-negative bacterium|pollen tube	path:mdm00040	Pentose and glucuronate interconversions
LOC103401638	0	0	0	0	0	0		uncharacterized LOC103401638
LOC103401642	0	0.0388248	0	0	0	0	MYB93	transcription factor MYB93-like	GO:0003700,GO:0005634,GO:0005737,GO:0009733,GO:0009737,GO:0009751,GO:0030154,GO:0040008,GO:0043565,GO:0044212,GO:0071365,GO:1901332	DNA-binding transcription factor activity|nucleus|cytoplasm|response to auxin|response to abscisic acid|response to salicylic acid|cell differentiation|regulation of growth|sequence-specific DNA binding|transcription regulatory region DNA binding|cellular response to auxin stimulus|negative regulation of lateral root development
LOC103401643	2.48528	2.12261	2.01596	3.97152	3.20801	3.41666	MGD2	monogalactosyldiacylglycerol synthase 2, chloroplastic-like	GO:0006631,GO:0009247,GO:0009707,GO:0016036,GO:0019374,GO:0035250,GO:0046509	fatty acid metabolic process|glycolipid biosynthetic process|chloroplast outer membrane|cellular response to phosphate starvation|galactolipid metabolic process|UDP-galactosyltransferase activity|1,2-diacylglycerol 3-beta-galactosyltransferase activity	path:mdm00561	Glycerolipid metabolism
LOC103401644	6.85001	4.38435	5.8748	10.4014	8.22429	8.1035		histone H2A.Z-specific chaperone CHZ1-like
LOC103401645	4.25817	3.74108	4.53362	3.2231	2.91014	3.92448	CAMTA3	calmodulin-binding transcription activator 3	GO:0001077,GO:0003700,GO:0005516,GO:0005634,GO:0006355,GO:0009409,GO:0010150,GO:0042742,GO:0043565,GO:0045944,GO:0050832,GO:0070417,GO:1900367	proximal promoter DNA-binding transcription activator activity, RNA polymerase II-specific|DNA-binding transcription factor activity|calmodulin binding|nucleus|regulation of transcription, DNA-templated|response to cold|leaf senescence|defense response to bacterium|sequence-specific DNA binding|positive regulation of transcription by RNA polymerase II|defense response to fungus|cellular response …
LOC103401646	24.8365	22.3833	24.7281	23.1267	24.7104	23.0253	UBP3	ubiquitin carboxyl-terminal hydrolase 3	GO:0004197,GO:0004843,GO:0005634,GO:0006511,GO:0016579	cysteine-type endopeptidase activity|thiol-dependent ubiquitin-specific protease activity|nucleus|ubiquitin-dependent protein catabolic process|protein deubiquitination
LOC103401647	39.3983	34.5271	38.5487	36.3598	28.0646	31.8645		NEDD8 ultimate buster 1
LOC103401648	24.5257	20.8756	24.1535	43.1529	46.703	42.1339	OS9	protein OS-9 homolog	GO:0005783,GO:0005788,GO:0009651,GO:0030246,GO:0030433,GO:0030970,GO:0036503	endoplasmic reticulum|endoplasmic reticulum lumen|response to salt stress|carbohydrate binding|ubiquitin-dependent ERAD pathway|retrograde protein transport, ER to cytosol|ERAD pathway	path:mdm04141	Protein processing in endoplasmic reticulum
LOC103401649	0	0.0544896	0	0.436825	0.290448	0.707518	PLT6	probable polyol transporter 6	GO:0005351,GO:0005355,GO:0005887,GO:0008645	carbohydrate:proton symporter activity|glucose transmembrane transporter activity|integral component of plasma membrane|hexose transmembrane transport
LOC103401650	6.79248	4.5194	4.8982	6.02877	6.22668	10.3219		uncharacterized LOC103401650
LOC103401651	9.10981	10.252	10.0182	7.21517	9.36929	8.93273	At5g65000	UDP-N-acetylglucosamine transporter ROCK1	GO:0005463,GO:0005783,GO:0005794,GO:0008643,GO:0010584,GO:0015136,GO:0015739,GO:0015789,GO:0030173,GO:1902183,GO:1903070,GO:1903857,GO:1990569	UDP-N-acetylgalactosamine transmembrane transporter activity|endoplasmic reticulum|Golgi apparatus|carbohydrate transport|pollen exine formation|sialic acid transmembrane transporter activity|sialic acid transport|UDP-N-acetylgalactosamine transmembrane transport|integral component of Golgi membrane|regulation of shoot apical meristem development|negative regulation of ER-associated ubiquitin-dep…
LOC103401652	42.6049	33.3003	40.6868	55.2847	73.5038	65.8005	RALFL24	protein RALF-like 24	GO:0005179,GO:0005622,GO:0007267,GO:0009506,GO:0019722,GO:0048046	hormone activity|intracellular|cell-cell signaling|plasmodesma|calcium-mediated signaling|apoplast
LOC103401653	1.18131	1.37496	1.52034	2.35786	2.1875	1.59993	HSFA5	heat stress transcription factor A-5-like	GO:0000978,GO:0003700,GO:0005634,GO:0005737,GO:0034605,GO:0043565,GO:0061408	RNA polymerase II proximal promoter sequence-specific DNA binding|DNA-binding transcription factor activity|nucleus|cytoplasm|cellular response to heat|sequence-specific DNA binding|positive regulation of transcription from RNA polymerase II promoter in response to heat stress
LOC103401654	0.943603	0.562002	0.451489	8.2636	13.5039	9.52495	ALKBH2	uncharacterized LOC103401654	GO:0005634,GO:0006281,GO:0006307,GO:0008198,GO:0035511,GO:0035514,GO:0043734,GO:0051747,GO:0103053	nucleus|DNA repair|DNA dealkylation involved in DNA repair|ferrous iron binding|oxidative DNA demethylation|DNA demethylase activity|DNA-N1-methyladenine dioxygenase activity|cytosine C-5 DNA demethylase activity|1-ethyladenine demethylase activity
LOC103401655	0.572843	0.609391	0.451398	0.194051	0.260044	0.451882	At5g38730	pentatricopeptide repeat-containing protein At5g38730
LOC103401656	6.9659	9.78107	8.21841	5.47915	5.09208	8.29059	GT17	probable xyloglucan galactosyltransferase GT17	GO:0000139,GO:0006486,GO:0016021,GO:0016757	Golgi membrane|protein glycosylation|integral component of membrane|transferase activity, transferring glycosyl groups
LOC103401657	2.28939	2.36951	2.94583	3.38158	2.23418	2.68968		uncharacterized LOC103401657
LOC103401658	8.76482	13.3822	14.181	15.7399	18.8673	16.4418		uncharacterized LOC103401658
LOC103401660	0	0	0	0	0	0	OFP7	transcription repressor OFP7-like	GO:0005634,GO:0005886,GO:0045892	nucleus|plasma membrane|negative regulation of transcription, DNA-templated
LOC103401661	2.42322	3.27488	3.45721	6.77135	5.72687	8.1758		probable serine/threonine-protein kinase DDB_G0267514
LOC103401662	2.67069	1.50028	1.74624	0.467173	0.939619	0.955239	SDH2-3	succinate dehydrogenase [ubiquinone] iron-sulfur subunit, mitochondrial-like	GO:0000104,GO:0005739,GO:0005743,GO:0006099,GO:0006121,GO:0008177,GO:0009055,GO:0009060,GO:0022904,GO:0045273,GO:0045281,GO:0046872,GO:0051537,GO:0051538,GO:0051539	succinate dehydrogenase activity|mitochondrion|mitochondrial inner membrane|tricarboxylic acid cycle|mitochondrial electron transport, succinate to ubiquinone|succinate dehydrogenase (ubiquinone) activity|electron transfer activity|aerobic respiration|respiratory electron transport chain|respiratory chain complex II|succinate dehydrogenase complex|metal ion binding|2 iron, 2 sulfur cluster bindin…
LOC103401663	0	0	0	0	0	0	ALMT2	aluminum-activated malate transporter 2-like	GO:0009705,GO:0015743,GO:0016021	plant-type vacuole membrane|malate transport|integral component of membrane
LOC103401664	3.31143	6.81869	4.68446	2.47544	10.6493	3.65839	ALMT2	aluminum-activated malate transporter 2-like	GO:0009705,GO:0015743,GO:0016021	plant-type vacuole membrane|malate transport|integral component of membrane
LOC103401669	8.29813	8.69773	8.51446	5.81852	5.13595	5.60426	rpc37	DNA-directed RNA polymerase III subunit RPC5	GO:0003899,GO:0005634,GO:0005666,GO:0005829,GO:0006383	DNA-directed 5'-3' RNA polymerase activity|nucleus|RNA polymerase III complex|cytosol|transcription by RNA polymerase III	path:mdm03020	RNA polymerase
LOC103401672	16.6117	17.4716	19.2652	22.1994	33.8024	23.3205	RABH1E	ras-related protein RABH1e	GO:0000139,GO:0003924,GO:0005525,GO:0005794,GO:0005829,GO:0006886,GO:0006890,GO:0006891,GO:0032482,GO:0042147	Golgi membrane|GTPase activity|GTP binding|Golgi apparatus|cytosol|intracellular protein transport|retrograde vesicle-mediated transport, Golgi to ER|intra-Golgi vesicle-mediated transport|Rab protein signal transduction|retrograde transport, endosome to Golgi
LOC103401674	0	0	0	0	0	0	GT17	probable xyloglucan galactosyltransferase GT17	GO:0000139,GO:0006486,GO:0016021,GO:0016757	Golgi membrane|protein glycosylation|integral component of membrane|transferase activity, transferring glycosyl groups
LOC103401676	11.4139	11.4005	11.8771	9.33102	7.13235	8.89179	U2AF65A	splicing factor U2af large subunit A-like	GO:0003723,GO:0005634,GO:0006397,GO:0008380	RNA binding|nucleus|mRNA processing|RNA splicing	path:mdm03040	Spliceosome
LOC103401678	0.59997	0.444695	0.380102	0.619955	0.412362	0.353962	LHW	transcription factor LHW-like	GO:0003677,GO:0003700,GO:0005634,GO:0006355,GO:0010078,GO:0010479,GO:0045893,GO:0046983,GO:0048364	DNA binding|DNA-binding transcription factor activity|nucleus|regulation of transcription, DNA-templated|maintenance of root meristem identity|stele development|positive regulation of transcription, DNA-templated|protein dimerization activity|root development
LOC103401681	15.5003	15.8603	13.2299	16.319	14.4525	12.2095	ACX2	acyl-coenzyme A oxidase 2, peroxisomal-like	GO:0001676,GO:0003997,GO:0005504,GO:0005777,GO:0006635,GO:0033540,GO:0050660,GO:0055088,GO:0071949	long-chain fatty acid metabolic process|acyl-CoA oxidase activity|fatty acid binding|peroxisome|fatty acid beta-oxidation|fatty acid beta-oxidation using acyl-CoA oxidase|flavin adenine dinucleotide binding|lipid homeostasis|FAD binding	path:mdm00071,path:mdm00410,path:mdm00592,path:mdm00640,path:mdm01040,path:mdm04146	Fatty acid degradation|beta-Alanine metabolism|alpha-Linolenic acid metabolism|Propanoate metabolism|Biosynthesis of unsaturated fatty acids|Peroxisome
LOC103401682	8.63463	13.7003	7.17841	18.9593	30.8206	23.2043	ERF060	ethylene-responsive transcription factor ERF060	GO:0003700,GO:0005634,GO:0009873,GO:0043565	DNA-binding transcription factor activity|nucleus|ethylene-activated signaling pathway|sequence-specific DNA binding
LOC103401686	16.9848	16.7455	15.2868	15.5473	16.0317	17.8411	MED26C	probable mediator of RNA polymerase II transcription subunit 26c	GO:0003746,GO:0005634,GO:0005829	translation elongation factor activity|nucleus|cytosol
LOC103401687	0	0.21492	0.416286	0.075585	0	0	ZFP2	zinc finger protein 2-like	GO:0003676,GO:0003700,GO:0005634,GO:0006355,GO:0046872,GO:0060862	nucleic acid binding|DNA-binding transcription factor activity|nucleus|regulation of transcription, DNA-templated|metal ion binding|negative regulation of floral organ abscission
LOC103401688	2.47038	3.37794	3.21355	3.05627	2.83955	2.86217	TFIIS	uncharacterized LOC103401688	GO:0003746,GO:0005634,GO:0006351,GO:0008270,GO:0009739,GO:0009845,GO:0009910,GO:0010162,GO:0034243	translation elongation factor activity|nucleus|transcription, DNA-templated|zinc ion binding|response to gibberellin|seed germination|negative regulation of flower development|seed dormancy process|regulation of transcription elongation from RNA polymerase II promoter
LOC103401690	5.81316	6.29659	5.58804	4.60193	2.97134	4.59996	NRPB8A	DNA-directed RNA polymerases II and V subunit 8A-like	GO:0000419,GO:0005665,GO:0005666,GO:0005736,GO:0006360,GO:0006366,GO:0006383	RNA polymerase V complex|RNA polymerase II, core complex|RNA polymerase III complex|RNA polymerase I complex|transcription by RNA polymerase I|transcription by RNA polymerase II|transcription by RNA polymerase III	path:mdm03020	RNA polymerase
LOC103401693	15.5612	16.127	16.683	13.6397	11.7324	15.5523		apoptotic chromatin condensation inducer in the nucleus			path:mdm03013,path:mdm03015,path:mdm03040	RNA transport|mRNA surveillance pathway|Spliceosome
LOC103401694	2.02243	2.49235	1.86554	2.65612	2.27605	2.25409	SPBC337.03	regulation of nuclear pre-mRNA domain-containing protein 1B-like	GO:0005634,GO:0005829,GO:0030846	nucleus|cytosol|termination of RNA polymerase II transcription, poly(A)-coupled
LOC103401695	15.2786	15.2969	15.7001	15.321	16.7066	15.2296		uncharacterized LOC103401695
LOC103401696	0	0	0	0	0	0	At1g64760	glucan endo-1,3-beta-glucosidase 8-like	GO:0005618,GO:0005886,GO:0005975,GO:0006952,GO:0009506,GO:0009664,GO:0031225,GO:0042973,GO:0046658,GO:0048046	cell wall|plasma membrane|carbohydrate metabolic process|defense response|plasmodesma|plant-type cell wall organization|anchored component of membrane|glucan endo-1,3-beta-D-glucosidase activity|anchored component of plasma membrane|apoplast
LOC103401697	3.4833	2.58521	2.7608	4.08866	2.90733	4.08846	SG1	protein SLOW GREEN 1, chloroplastic	GO:0009507,GO:0009536,GO:0009658,GO:0009941	chloroplast|plastid|chloroplast organization|chloroplast envelope
LOC103401698	72.6414	67.8389	69.1273	176.598	189.544	171.179	At2g21870	probable ATP synthase 24 kDa subunit, mitochondrial	GO:0005507,GO:0005730,GO:0005739,GO:0005753,GO:0006811,GO:0008270,GO:0009507,GO:0009555,GO:0016020,GO:0045263,GO:0050897	copper ion binding|nucleolus|mitochondrion|mitochondrial proton-transporting ATP synthase complex|ion transport|zinc ion binding|chloroplast|pollen development|membrane|proton-transporting ATP synthase complex, coupling factor F(o)|cobalt ion binding
LOC103401699	115.004	103.411	108.215	99.0829	114.508	107.059	ISCA	iron-sulfur assembly protein IscA, chloroplastic	GO:0005198,GO:0009570,GO:0016226,GO:0046872,GO:0051536,GO:0097428	structural molecule activity|chloroplast stroma|iron-sulfur cluster assembly|metal ion binding|iron-sulfur cluster binding|protein maturation by iron-sulfur cluster transfer
LOC103401702	6.39012	8.08969	6.66842	9.46825	10.2349	8.36808	EMB3004	bifunctional 3-dehydroquinate dehydratase/shikimate dehydrogenase, chloroplastic-like	GO:0003855,GO:0004764,GO:0009073,GO:0009423,GO:0009507,GO:0009570,GO:0009793,GO:0019632,GO:0050661	3-dehydroquinate dehydratase activity|shikimate 3-dehydrogenase (NADP+) activity|aromatic amino acid family biosynthetic process|chorismate biosynthetic process|chloroplast|chloroplast stroma|embryo development ending in seed dormancy|shikimate metabolic process|NADP binding	path:mdm00400	Phenylalanine, tyrosine and tryptophan biosynthesis
LOC103401704	0	0	0	0	0	0		uncharacterized LOC103401704
LOC103401707	0	0	0	0	0	0		uncharacterized LOC103401707
LOC103401708	8.91815	9.98769	8.91088	6.8925	3.52177	5.68354		uncharacterized LOC103401708
LOC103401710	8.65337	9.76216	7.0773	3.47695	4.1339	6.19611		ras-related protein Rab7-like	GO:0003924,GO:0005525,GO:0005774,GO:0005886,GO:0006886,GO:0032482	GTPase activity|GTP binding|vacuolar membrane|plasma membrane|intracellular protein transport|Rab protein signal transduction	path:mdm04144,path:mdm04145	Endocytosis|Phagosome
LOC103401711	16.5715	15.4991	14.7667	13.7631	15.1681	13.4129	TFIIS	transcription elongation factor TFIIS-like	GO:0003746,GO:0005634,GO:0006351,GO:0008270,GO:0009739,GO:0009845,GO:0009910,GO:0010162,GO:0034243	translation elongation factor activity|nucleus|transcription, DNA-templated|zinc ion binding|response to gibberellin|seed germination|negative regulation of flower development|seed dormancy process|regulation of transcription elongation from RNA polymerase II promoter
LOC103401712	0.0944041	0.0362101	0.105582	0	0	0	ARP8	actin-related protein 8-like	GO:0005200,GO:0005524,GO:0005634,GO:0005730,GO:0005737,GO:0030029	structural constituent of cytoskeleton|ATP binding|nucleus|nucleolus|cytoplasm|actin filament-based process
LOC103401714	57.1423	56.1528	55.6004	39.9054	41.5378	33.2943	ALDH3H1	aldehyde dehydrogenase family 3 member H1-like	GO:0004028,GO:0004029,GO:0005773,GO:0005783,GO:0005794,GO:0006081,GO:0009269,GO:0009506,GO:0009536,GO:0009651,GO:0009737,GO:0016020,GO:0043878	3-chloroallyl aldehyde dehydrogenase activity|aldehyde dehydrogenase (NAD) activity|vacuole|endoplasmic reticulum|Golgi apparatus|cellular aldehyde metabolic process|response to desiccation|plasmodesma|plastid|response to salt stress|response to abscisic acid|membrane|glyceraldehyde-3-phosphate dehydrogenase (NAD+) (non-phosphorylating) activity	path:mdm00010,path:mdm00053,path:mdm00071,path:mdm00280,path:mdm00310,path:mdm00330,path:mdm00340,path:mdm00380,path:mdm00410,path:mdm00561,path:mdm00620,path:mdm00903	Glycolysis / Gluconeogenesis|Ascorbate and aldarate metabolism|Fatty acid degradation|Valine, leucine and isoleucine degradation|Lysine degradation|Arginine and proline metabolism|Histidine metabolism|Tryptophan metabolism|beta-Alanine metabolism|Glycerolipid metabolism|Pyruvate metabolism|Limonene and pinene degradation
LOC103401716	11.1917	12.7949	12.6859	13.4731	9.8683	13.9903	CSI3	protein CELLULOSE SYNTHASE INTERACTIVE 3	GO:0005886,GO:0007275,GO:0008360,GO:0009826,GO:0010330,GO:0012505,GO:0040008,GO:0052324,GO:0055028,GO:0072699	plasma membrane|multicellular organism development|regulation of cell shape|unidimensional cell growth|cellulose synthase complex|endomembrane system|regulation of growth|plant-type cell wall cellulose biosynthetic process|cortical microtubule|protein localization to cortical microtubule cytoskeleton
LOC103401717	1.37157	1.43203	1.6418	1.85919	4.5394	2.26319	NAC002	NAC domain-containing protein 2	GO:0003677,GO:0003700,GO:0005634,GO:0009611,GO:0009788,GO:0019900	DNA binding|DNA-binding transcription factor activity|nucleus|response to wounding|negative regulation of abscisic acid-activated signaling pathway|kinase binding
LOC103401718	8.96004	10.0178	9.67229	10.6481	7.65659	8.73364	At4g36680	pentatricopeptide repeat-containing protein At4g36680, mitochondrial-like
LOC103401719	0	0.103949	0.30355	0.0559479	0.202029	0	BBR	E3 ubiquitin ligase BIG BROTHER-related	GO:0004842,GO:0016567,GO:0046872,GO:0051865	ubiquitin-protein transferase activity|protein ubiquitination|metal ion binding|protein autoubiquitination
LOC103401720	107.621	105.07	114.185	80.1468	95.7732	84.9882	PBC1	proteasome subunit beta type-3-A	GO:0000502,GO:0004175,GO:0004298,GO:0005634,GO:0005737,GO:0005774,GO:0005829,GO:0005839,GO:0010498,GO:0010499,GO:0019774,GO:0043161	proteasome complex|endopeptidase activity|threonine-type endopeptidase activity|nucleus|cytoplasm|vacuolar membrane|cytosol|proteasome core complex|proteasomal protein catabolic process|proteasomal ubiquitin-independent protein catabolic process|proteasome core complex, beta-subunit complex|proteasome-mediated ubiquitin-dependent protein catabolic process	path:mdm03050	Proteasome
LOC103401723	5.88836	7.38995	7.62526	4.43252	3.89325	4.1876	SWI3C	SWI/SNF complex subunit SWI3C	GO:0003677,GO:0006338,GO:0007275,GO:0016514	DNA binding|chromatin remodeling|multicellular organism development|SWI/SNF complex
LOC103401724	5.35107	6.64248	5.25756	4.65768	3.88784	4.94397	RFC2	replication factor C subunit 2	GO:0003677,GO:0005524,GO:0005634,GO:0005663,GO:0005730,GO:0006261	DNA binding|ATP binding|nucleus|DNA replication factor C complex|nucleolus|DNA-dependent DNA replication	path:mdm03030,path:mdm03420,path:mdm03430	DNA replication|Nucleotide excision repair|Mismatch repair
LOC103401725	0.571941	0.388043	0.319891	1.15058	1.24132	1.33725	CYCA1-1	cyclin-A1-1	GO:0000079,GO:0000278,GO:0000307,GO:0005634,GO:0005737,GO:0006468,GO:0007088,GO:0008284,GO:0016538,GO:0019901,GO:0045787,GO:0051301	regulation of cyclin-dependent protein serine/threonine kinase activity|mitotic cell cycle|cyclin-dependent protein kinase holoenzyme complex|nucleus|cytoplasm|protein phosphorylation|regulation of mitotic nuclear division|positive regulation of cell proliferation|cyclin-dependent protein serine/threonine kinase regulator activity|protein kinase binding|positive regulation of cell cycle|cell divi…
LOC103401727	13.752	12.948	11.2635	15.2798	10.286	12.0862		uncharacterized LOC103401727
LOC103401728	27.0872	29.4423	25.3105	26.2663	23.2013	26.2102	At5g66720	probable protein phosphatase 2C 80	GO:0004721,GO:0009507,GO:0009570,GO:0046872	phosphoprotein phosphatase activity|chloroplast|chloroplast stroma|metal ion binding
LOC103401729	3.98757	9.70186	5.94511	3.36602	4.07974	1.89134	AAP3	amino acid permease 3-like	GO:0003333,GO:0005886,GO:0015171,GO:0015293,GO:0015802,GO:0016021,GO:0031965	amino acid transmembrane transport|plasma membrane|amino acid transmembrane transporter activity|symporter activity|basic amino acid transport|integral component of membrane|nuclear membrane
LOC103401730	0.382875	0.446527	1.80531	0.393291	1.09809	0.0857978	AAP3	amino acid permease 3-like	GO:0003333,GO:0005886,GO:0015171,GO:0015293,GO:0015802,GO:0016021,GO:0031965	amino acid transmembrane transport|plasma membrane|amino acid transmembrane transporter activity|symporter activity|basic amino acid transport|integral component of membrane|nuclear membrane
LOC103401731	0	0	0	0	0.0732477	0		uncharacterized LOC103401731
LOC103401733	0	0	0.0231521	0.0851496	0.116052	0.151566	At1g11050	probable receptor-like protein kinase At1g11050
LOC103401736	0	0.0662879	0	0	0	0.0360483	GT4	putative UDP-rhamnose:rhamnosyltransferase 1	GO:0016021,GO:0016758	integral component of membrane|transferase activity, transferring hexosyl groups
LOC103401737	7.10407	7.69349	6.80977	7.58467	7.44889	6.67499	ENY	zinc finger protein GAI-ASSOCIATED FACTOR 1-like	GO:0003700,GO:0005634,GO:0006355,GO:0009740,GO:0009937,GO:0010029,GO:0010431,GO:0044212,GO:0046872	DNA-binding transcription factor activity|nucleus|regulation of transcription, DNA-templated|gibberellic acid mediated signaling pathway|regulation of gibberellic acid mediated signaling pathway|regulation of seed germination|seed maturation|transcription regulatory region DNA binding|metal ion binding
LOC103401750	0.620681	0.603455	0.601834	0.572904	0.211995	0.309774		uncharacterized LOC103401750
LOC103401753	0.671183	1.28751	0.800605	1.76136	2.32022	2.98879		delta(7)-sterol-C5(6)-desaturase-like	GO:0005506,GO:0005789,GO:0016021,GO:0016126,GO:0016491	iron ion binding|endoplasmic reticulum membrane|integral component of membrane|sterol biosynthetic process|oxidoreductase activity	path:mdm00100	Steroid biosynthesis
LOC103401754	0.0854917	0	0	0.0447651	0.183432	0.114647	At1g54200	protein BIG GRAIN 1-like B	GO:0005886,GO:0009734,GO:0010929,GO:0060918	plasma membrane|auxin-activated signaling pathway|positive regulation of auxin mediated signaling pathway|auxin transport
LOC103401755	7.21759	7.23396	7.05633	8.7168	6.29201	7.31692	GIP1	uncharacterized LOC103401755	GO:0005634,GO:0042802,GO:0043388,GO:0051082	nucleus|identical protein binding|positive regulation of DNA binding|unfolded protein binding
LOC103401756	13.8528	13.4299	13.1234	10.8909	9.54765	12.1067	CID3	polyadenylate-binding protein-interacting protein 3-like	GO:0010494,GO:0010603,GO:0034063	cytoplasmic stress granule|regulation of cytoplasmic mRNA processing body assembly|stress granule assembly
LOC103401757	7.91667	8.41148	8.75503	6.12759	5.19078	7.40172	SPAC26H5.04	uncharacterized protein C26H5.04-like	GO:0005634,GO:0005829,GO:0034657,GO:0043161,GO:0045721	nucleus|cytosol|GID complex|proteasome-mediated ubiquitin-dependent protein catabolic process|negative regulation of gluconeogenesis
LOC103401760	24.2041	21.5865	20.6453	17.1712	22.8194	16.1293	NRPB8A	DNA-directed RNA polymerases II and V subunit 8A-like	GO:0000419,GO:0005665,GO:0005666,GO:0005736,GO:0006360,GO:0006366,GO:0006383	RNA polymerase V complex|RNA polymerase II, core complex|RNA polymerase III complex|RNA polymerase I complex|transcription by RNA polymerase I|transcription by RNA polymerase II|transcription by RNA polymerase III	path:mdm03020	RNA polymerase
LOC103401761	27.8017	24.9488	25.0294	22.1167	23.3643	17.3101		heterogeneous nuclear ribonucleoprotein F-like
LOC103401762	0.640084	1.43809	1.33933	2.40562	2.21299	2.71898		threonine synthase, chloroplastic-like	GO:0004795,GO:0009088,GO:0009507,GO:0030170	threonine synthase activity|threonine biosynthetic process|chloroplast|pyridoxal phosphate binding	path:mdm00260,path:mdm00750	Glycine, serine and threonine metabolism|Vitamin B6 metabolism
LOC103401764	41.5351	50.5347	48.0579	46.2506	45.1457	45.6086	At1g54220	dihydrolipoyllysine-residue acetyltransferase component 2 of pyruvate dehydrogenase complex, mitochondrial-like	GO:0004742,GO:0005737,GO:0005739,GO:0005759,GO:0006096,GO:0016407,GO:0031405,GO:0045254	dihydrolipoyllysine-residue acetyltransferase activity|cytoplasm|mitochondrion|mitochondrial matrix|glycolytic process|acetyltransferase activity|lipoic acid binding|pyruvate dehydrogenase complex	path:mdm00010,path:mdm00020,path:mdm00620	Glycolysis / Gluconeogenesis|Citrate cycle (TCA cycle)|Pyruvate metabolism
LOC103401765	29.7482	24.7017	28.7796	21.6047	22.3354	24.0088	TIM23-2	mitochondrial import inner membrane translocase subunit TIM23-2-like	GO:0005739,GO:0005743,GO:0005744,GO:0008320,GO:0015450,GO:0016020,GO:0030150,GO:0031305	mitochondrion|mitochondrial inner membrane|TIM23 mitochondrial import inner membrane translocase complex|protein transmembrane transporter activity|P-P-bond-hydrolysis-driven protein transmembrane transporter activity|membrane|protein import into mitochondrial matrix|integral component of mitochondrial inner membrane
LOC103401766	27.3716	18.7902	21.8697	21.1895	25.0593	24.4088	HAB1	protein phosphatase 2C 16-like	GO:0004722,GO:0005634,GO:0005737,GO:0009738,GO:0046872	protein serine/threonine phosphatase activity|nucleus|cytoplasm|abscisic acid-activated signaling pathway|metal ion binding	path:mdm04016,path:mdm04075	MAPK signaling pathway - plant|Plant hormone signal transduction
LOC103401768	0.477821	0.570835	0.351471	0.0958206	0.103995	0.193344		uncharacterized LOC103401768
LOC103401769	87.2173	72.0675	78.7737	91.9857	78.5771	86.1851	CKL2	casein kinase 1-like protein 2	GO:0004674,GO:0005524,GO:0005634,GO:0005737,GO:0005886,GO:0006897,GO:0018105,GO:0018107	protein serine/threonine kinase activity|ATP binding|nucleus|cytoplasm|plasma membrane|endocytosis|peptidyl-serine phosphorylation|peptidyl-threonine phosphorylation
LOC103401770	0.0389768	0	0	0.0404	0	0		uncharacterized LOC103401770
LOC103401780	0	0	0.0517792	0	0	0.0972027	ATHB-40	homeobox-leucine zipper protein ATHB-40-like	GO:0003700,GO:0005634,GO:0009733,GO:0043565	DNA-binding transcription factor activity|nucleus|response to auxin|sequence-specific DNA binding
LOC103401782	7.08148	4.99594	5.4033	6.55749	5.09456	6.01003	SPCC777.06c	putative hydrolase C777.06c	GO:0005634,GO:0005829,GO:0016787	nucleus|cytosol|hydrolase activity
LOC103401783	0.283516	0.199619	0	0.0194137	0.0881054	0.0792842	IDD7	protein indeterminate-domain 7	GO:0003677,GO:0003700,GO:0005634,GO:0006355,GO:0046872	DNA binding|DNA-binding transcription factor activity|nucleus|regulation of transcription, DNA-templated|metal ion binding
LOC103401784	0	0	0	0	0	0	LBD22	LOB domain-containing protein 22
LOC103401785	2.85505	3.31942	3.86472	2.23683	2.34008	2.21187	TBL14	protein trichome birefringence-like 14	GO:0005794,GO:0005975,GO:0016021,GO:0016407,GO:0045492	Golgi apparatus|carbohydrate metabolic process|integral component of membrane|acetyltransferase activity|xylan biosynthetic process
LOC103401786	0.50488	0.515247	0.776356	2.18148	1.91847	1.84354	HDA14	histone deacetylase 14	GO:0005634,GO:0005829,GO:0009507,GO:0032041,GO:0042903,GO:0043014,GO:0043621,GO:0048487,GO:0051721,GO:0090042	nucleus|cytosol|chloroplast|NAD-dependent histone deacetylase activity (H3-K14 specific)|tubulin deacetylase activity|alpha-tubulin binding|protein self-association|beta-tubulin binding|protein phosphatase 2A binding|tubulin deacetylation
LOC103401787	12.7799	13.792	14.5695	12.4471	13.2736	14.9866	At5g09300	2-oxoisovalerate dehydrogenase subunit alpha 2, mitochondrial-like	GO:0003826,GO:0003863,GO:0005739,GO:0005947,GO:0009083,GO:0046872	alpha-ketoacid dehydrogenase activity|3-methyl-2-oxobutanoate dehydrogenase (2-methylpropanoyl-transferring) activity|mitochondrion|mitochondrial alpha-ketoglutarate dehydrogenase complex|branched-chain amino acid catabolic process|metal ion binding	path:mdm00280,path:mdm00640	Valine, leucine and isoleucine degradation|Propanoate metabolism
LOC103401788	31.4279	28.3453	33.1322	24.6856	38.1322	25.1626	smd2	probable small nuclear ribonucleoprotein Sm D2	GO:0000387,GO:0000395,GO:0000974,GO:0005634,GO:0005681,GO:0005682,GO:0005685,GO:0005686,GO:0046540,GO:0071004,GO:0071013,GO:0071014	spliceosomal snRNP assembly|mRNA 5'-splice site recognition|Prp19 complex|nucleus|spliceosomal complex|U5 snRNP|U1 snRNP|U2 snRNP|U4/U6 x U5 tri-snRNP complex|U2-type prespliceosome|catalytic step 2 spliceosome|post-mRNA release spliceosomal complex	path:mdm03040	Spliceosome
LOC103401791	3.48184	2.65165	4.07907	6.07347	3.76282	4.13336	PAP7	probable plastid-lipid-associated protein 7, chloroplastic	GO:0009507,GO:0009570,GO:0010236	chloroplast|chloroplast stroma|plastoquinone biosynthetic process
LOC103401792	0	0	0	0	0	0		uncharacterized LOC103401792
LOC103401794	3.52519	3.11205	2.87999	1.64676	2.90205	1.59797	LRK10L-1.4	LEAF RUST 10 DISEASE-RESISTANCE LOCUS RECEPTOR-LIKE PROTEIN KINASE-like 1.3
LOC103401799	0.0543699	0.156471	0.12147	0	0	0	SMR13	cyclin-dependent protein kinase inhibitor SMR9-like	GO:0004860,GO:0005634,GO:0007049,GO:0045786,GO:0045839	protein kinase inhibitor activity|nucleus|cell cycle|negative regulation of cell cycle|negative regulation of mitotic nuclear division
LOC103401801	0.517491	0.279527	0.35921	0.23303	0.269756	0.536021	MTERF15	transcription termination factor MTERF15, mitochondrial-like	GO:0000394,GO:0003690,GO:0003723,GO:0005739,GO:0006353,GO:0006355,GO:0009507,GO:0009658,GO:0032502	RNA splicing, via endonucleolytic cleavage and ligation|double-stranded DNA binding|RNA binding|mitochondrion|DNA-templated transcription, termination|regulation of transcription, DNA-templated|chloroplast|chloroplast organization|developmental process
LOC103401809	1.14775	1.06172	1.25248	1.56843	1.41543	1.6226	DML2	DEMETER-like protein 2	GO:0003677,GO:0005634,GO:0006284,GO:0016787,GO:0046872,GO:0051539	DNA binding|nucleus|base-excision repair|hydrolase activity|metal ion binding|4 iron, 4 sulfur cluster binding
LOC103401815	1.03466	0.724786	0.667163	1.12205	0.96506	0.953374		uncharacterized LOC103401815
LOC103401816	0	0	0	0	0	0		uncharacterized LOC103401816
LOC103401820	0.212446	0.0881171	0.136988	0.188827	0.0861952	0.0321016	CAD1	probable mannitol dehydrogenase	GO:0008270,GO:0046029	zinc ion binding|mannitol dehydrogenase activity
LOC103401822	0	0	0	0	0	0	GT5	anthocyanidin 3-O-glucosyltransferase 5-like	GO:0009718,GO:0047213	anthocyanin-containing compound biosynthetic process|anthocyanidin 3-O-glucosyltransferase activity	path:mdm00940	Phenylpropanoid biosynthesis
LOC103401823	0.133586	0.295003	0.0380927	1.51743	22.3604	6.23516	LIGB	extradiol ring-cleavage dioxygenase-like	GO:0006725,GO:0008198,GO:0008270,GO:0016701,GO:0051213	cellular aromatic compound metabolic process|ferrous iron binding|zinc ion binding|oxidoreductase activity, acting on single donors with incorporation of molecular oxygen|dioxygenase activity	path:mdm00965	Betalain biosynthesis
LOC103401824	8.27727	13.7749	9.40735	11.4445	13.523	14.0494	CESA2	cellulose synthase A catalytic subunit 2 [UDP-forming]	GO:0005794,GO:0005802,GO:0005886,GO:0009833,GO:0016021,GO:0016759,GO:0016760,GO:0030244,GO:0046872,GO:0071555	Golgi apparatus|trans-Golgi network|plasma membrane|plant-type primary cell wall biogenesis|integral component of membrane|cellulose synthase activity|cellulose synthase (UDP-forming) activity|cellulose biosynthetic process|metal ion binding|cell wall organization
LOC103401826	12.8011	12.3911	13.5116	9.48619	7.27788	9.74125	rsd1	RNA-binding protein 39	GO:0003723,GO:0003729,GO:0005634,GO:0005681,GO:0010494,GO:0045292,GO:0061158,GO:1990446,GO:1990904	RNA binding|mRNA binding|nucleus|spliceosomal complex|cytoplasmic stress granule|mRNA cis splicing, via spliceosome|3'-UTR-mediated mRNA destabilization|U1 snRNP binding|ribonucleoprotein complex
LOC103401828	74.8077	73.2483	72.0926	75.2106	67.0975	74.6123	LCV2	protein LIKE COV 2-like	GO:0005768,GO:0005794,GO:0005802,GO:0010222,GO:0016021	endosome|Golgi apparatus|trans-Golgi network|stem vascular tissue pattern formation|integral component of membrane
LOC103401829	3.21802	3.921	4.03866	3.82279	4.86713	3.35974	RNR1	ribonucleoside-diphosphate reductase large subunit	GO:0004748,GO:0005524,GO:0005971,GO:0006260,GO:0009202,GO:0009263,GO:0046686	ribonucleoside-diphosphate reductase activity, thioredoxin disulfide as acceptor|ATP binding|ribonucleoside-diphosphate reductase complex|DNA replication|deoxyribonucleoside triphosphate biosynthetic process|deoxyribonucleotide biosynthetic process|response to cadmium ion	path:mdm00230,path:mdm00240,path:mdm00480	Purine metabolism|Pyrimidine metabolism|Glutathione metabolism
LOC103401830	1.05225	0.892877	0.96538	0.95696	0.553022	0.97805	CALS5	callose synthase 5-like	GO:0000148,GO:0003843,GO:0006075,GO:0008360,GO:0009556,GO:0009846,GO:0009860,GO:0010208,GO:0016021,GO:0071555,GO:0080092	1,3-beta-D-glucan synthase complex|1,3-beta-D-glucan synthase activity|(1->3)-beta-D-glucan biosynthetic process|regulation of cell shape|microsporogenesis|pollen germination|pollen tube growth|pollen wall assembly|integral component of membrane|cell wall organization|regulation of pollen tube growth
LOC103401835	3.08725	2.81646	2.87825	1.82369	1.6203	1.67373	At1g77540	acetyltransferase At1g77540-like	GO:0004402,GO:0005777,GO:0006473,GO:0016410	histone acetyltransferase activity|peroxisome|protein acetylation|N-acyltransferase activity
LOC103401836	37.1861	39.2349	40.3431	43.9699	30.4714	37.3317	SKIP32	F-box protein 7	GO:0004842,GO:0005634,GO:0005737,GO:0005739,GO:0006417,GO:0009408,GO:0009409,GO:0019005,GO:0031146,GO:0090406	ubiquitin-protein transferase activity|nucleus|cytoplasm|mitochondrion|regulation of translation|response to heat|response to cold|SCF ubiquitin ligase complex|SCF-dependent proteasomal ubiquitin-dependent protein catabolic process|pollen tube
LOC103401838	72.1248	66.7886	69.7728	65.8386	73.8838	69.4145		V-type proton ATPase 16 kDa proteolipid subunit	GO:0005774,GO:0015078,GO:0015991,GO:0016021,GO:0033179	vacuolar membrane|proton transmembrane transporter activity|ATP hydrolysis coupled proton transport|integral component of membrane|proton-transporting V-type ATPase, V0 domain	path:mdm00190,path:mdm04145	Oxidative phosphorylation|Phagosome
LOC103401839	28.248	19.6524	22.5757	22.8692	16.8422	22.5859		TLC domain-containing protein 2
LOC103401840	84.4389	155.797	107.073	29.3909	21.1308	14.586	GT5	anthocyanidin 3-O-glucosyltransferase 5-like	GO:0009718,GO:0047213	anthocyanin-containing compound biosynthetic process|anthocyanidin 3-O-glucosyltransferase activity	path:mdm00940	Phenylpropanoid biosynthesis
LOC103401842	4.82451	3.35783	3.7932	2.30837	3.07603	3.31259	At4g08330	uncharacterized protein At4g08330, chloroplastic-like	GO:0005886,GO:0009507	plasma membrane|chloroplast
LOC103401844	0	0.0424966	0.0987832	0	0	0.0459317	LIMYB	L10-interacting MYB domain-containing protein-like	GO:0005634	nucleus
LOC103401848	0	0	0	0	0	0	CRK25	putative cysteine-rich receptor-like protein kinase 9
LOC103401849	14.1785	11.4788	10.8818	10.0953	12.818	9.6945	BEH2	BES1/BZR1 homolog protein 2-like	GO:0003677,GO:0003700,GO:0006351,GO:0009742	DNA binding|DNA-binding transcription factor activity|transcription, DNA-templated|brassinosteroid mediated signaling pathway	path:mdm04075	Plant hormone signal transduction
LOC103401850	0	0	0	0.0474677	0.0427073	0	NRPA1	DNA-directed RNA polymerase I subunit 1-like	GO:0003677,GO:0003899,GO:0005634,GO:0005736,GO:0006360,GO:0008270,GO:0009506,GO:0042254	DNA binding|DNA-directed 5'-3' RNA polymerase activity|nucleus|RNA polymerase I complex|transcription by RNA polymerase I|zinc ion binding|plasmodesma|ribosome biogenesis
LOC103401851	0.189507	0.186468	0.174523	1.72737	0.812614	0.94542	GRP-2	glycine-rich protein 2-like	GO:0003677,GO:0003723,GO:0006355,GO:0008270	DNA binding|RNA binding|regulation of transcription, DNA-templated|zinc ion binding
LOC103401852	0.0667436	0.0637973	0.0744412	0.0344587	0	0	LAX3	auxin transporter-like protein 3	GO:0005886,GO:0006865,GO:0009734,GO:0015293,GO:0016021	plasma membrane|amino acid transport|auxin-activated signaling pathway|symporter activity|integral component of membrane	path:mdm04075	Plant hormone signal transduction
LOC103401853	6.98086	6.85535	4.49841	7.88963	5.81229	9.20769	OFUT11	O-fucosyltransferase 10
LOC103401855	15.7947	14.3846	14.8716	18.374	16.373	14.0645	HCS1	biotin--protein ligase 2-like	GO:0004077,GO:0004078,GO:0005524,GO:0005829,GO:0006464,GO:0009507,GO:0009536,GO:0042966	biotin-[acetyl-CoA-carboxylase] ligase activity|biotin-[methylcrotonoyl-CoA-carboxylase] ligase activity|ATP binding|cytosol|cellular protein modification process|chloroplast|plastid|biotin carboxyl carrier protein biosynthetic process	path:mdm00780	Biotin metabolism
LOC103401856	6.80517	5.75278	6.69792	4.53576	3.07012	4.48689	ASHR1	histone-lysine N-methyltransferase ASHR1	GO:0005634,GO:0005694,GO:0018024,GO:0046872	nucleus|chromosome|histone-lysine N-methyltransferase activity|metal ion binding	path:mdm00310	Lysine degradation
LOC103401857	0.573551	0.392505	0.474597	0.202539	0.339884	0.126597	mph1	serine/threonine-protein kinase mph1	GO:0000778,GO:0004672,GO:0004674,GO:0004712,GO:0005524,GO:0005634,GO:0005829,GO:0007094,GO:0007127,GO:0032092,GO:0034613,GO:0044732,GO:0051301,GO:0051304,GO:0072480,GO:0090267,GO:1990299	condensed nuclear chromosome kinetochore|protein kinase activity|protein serine/threonine kinase activity|protein serine/threonine/tyrosine kinase activity|ATP binding|nucleus|cytosol|mitotic spindle assembly checkpoint|meiosis I|positive regulation of protein binding|cellular protein localization|mitotic spindle pole body|cell division|chromosome separation|signal transduction involved in mitoti…
LOC103401859	2.93757	4.309	2.85837	1.89363	2.60839	2.16375	ORP1C	oxysterol-binding protein-related protein 1C-like	GO:0005829,GO:0008289,GO:0015248,GO:0016020,GO:0032934,GO:0043231	cytosol|lipid binding|sterol transporter activity|membrane|sterol binding|intracellular membrane-bounded organelle
LOC103401862	2.08919	1.83271	1.84533	3.5871	4.00041	4.50553		early endosome antigen 1-like
LOC103401863	13.1706	14.8428	11.7731	10.356	9.99708	12.548		multidrug resistance protein 2-like
LOC103401865	0	0	0	0	0	0	GPAT3	probable glycerol-3-phosphate acyltransferase 3	GO:0004366,GO:0010143,GO:0016020,GO:0016021,GO:0016024,GO:0016791,GO:0090447,GO:0102420	glycerol-3-phosphate O-acyltransferase activity|cutin biosynthetic process|membrane|integral component of membrane|CDP-diacylglycerol biosynthetic process|phosphatase activity|glycerol-3-phosphate 2-O-acyltransferase activity|sn-1-glycerol-3-phosphate C16:0-DCA-CoA acyl transferase activity	path:mdm00561,path:mdm00564	Glycerolipid metabolism|Glycerophospholipid metabolism
LOC103401867	1.39719	1.16982	0.766497	1.10533	0.832711	1.30803	TGA7	transcription factor TGA7	GO:0003700,GO:0005634,GO:0006351,GO:0042742,GO:0043565	DNA-binding transcription factor activity|nucleus|transcription, DNA-templated|defense response to bacterium|sequence-specific DNA binding	path:mdm04075	Plant hormone signal transduction
LOC103401868	0.235594	0.162051	0.321391	0.695064	0.181487	0.202691		uncharacterized LOC103401868
LOC103401869	0.832854	1.25652	0.964668	0.724294	0.599394	0.670323	ARF17	auxin response factor 17	GO:0000987,GO:0003700,GO:0005634,GO:0006355,GO:0009555,GO:0009653,GO:0009734,GO:0010208,GO:0048830,GO:0052543	proximal promoter sequence-specific DNA binding|DNA-binding transcription factor activity|nucleus|regulation of transcription, DNA-templated|pollen development|anatomical structure morphogenesis|auxin-activated signaling pathway|pollen wall assembly|adventitious root development|callose deposition in cell wall
LOC103401870	74.3764	67.2382	75.3634	58.1332	67.0068	52.587	At1g77840	probable eukaryotic translation initiation factor 5-1	GO:0003743,GO:0005525,GO:0005634,GO:0005737	translation initiation factor activity|GTP binding|nucleus|cytoplasm	path:mdm03013	RNA transport
LOC103401871	89.5353	76.8189	84.0769	73.5829	96.2795	83.4386		transmembrane protein 50A
LOC103401872	44.5811	45.6308	45.5559	47.1274	48.7566	45.0679	RCE1	NEDD8-conjugating enzyme Ubc12-like	GO:0005524,GO:0009733,GO:0019788,GO:0045116	ATP binding|response to auxin|NEDD8 transferase activity|protein neddylation	path:mdm04120	Ubiquitin mediated proteolysis
LOC103401873	168.823	140.813	146.107	157.727	239.91	155.478		uncharacterized LOC103401873
LOC103401874	46.0896	40.9176	48.7083	41.6592	54.3568	35.9367		cytochrome b-c1 complex subunit 9-like	GO:0005750,GO:0006122	mitochondrial respiratory chain complex III|mitochondrial electron transport, ubiquinol to cytochrome c	path:mdm00190	Oxidative phosphorylation
LOC103401876	0	0.0819383	0	0	0	0		transcriptional regulatory protein DOT6
LOC103401877	27.3701	25.0546	21.1969	33.2861	28.1515	28.9077	HAM1	histone acetyltransferase of the MYST family 1-like	GO:0000123,GO:0000790,GO:0004402,GO:0005634,GO:0006281,GO:0010224,GO:0010485,GO:0042393,GO:0043995,GO:0045892,GO:0045944,GO:0046872,GO:2000028	histone acetyltransferase complex|nuclear chromatin|histone acetyltransferase activity|nucleus|DNA repair|response to UV-B|H4 histone acetyltransferase activity|histone binding|histone acetyltransferase activity (H4-K5 specific)|negative regulation of transcription, DNA-templated|positive regulation of transcription by RNA polymerase II|metal ion binding|regulation of photoperiodism, flowering
LOC103401878	8.44129	8.21222	7.53842	6.9463	5.06599	6.00288	ATX1	uncharacterized LOC103401878	GO:0000785,GO:0005634,GO:0005737,GO:0005886,GO:0006355,GO:0009909,GO:0010093,GO:0010314,GO:0018024,GO:0035556,GO:0044212,GO:0046872,GO:0051568	chromatin|nucleus|cytoplasm|plasma membrane|regulation of transcription, DNA-templated|regulation of flower development|specification of floral organ identity|phosphatidylinositol-5-phosphate binding|histone-lysine N-methyltransferase activity|intracellular signal transduction|transcription regulatory region DNA binding|metal ion binding|histone H3-K4 methylation
LOC103401879	7.46702	8.80238	8.23137	7.96003	7.48959	8.71276		uncharacterized LOC103401879
LOC103401881	7.67674	9.30093	12.1923	13.4251	14.8004	6.80461		uncharacterized LOC103401881
LOC103401882	70.8741	63.3049	74.3656	66.5702	74.4743	64.8287	RCE1	NEDD8-conjugating enzyme Ubc12	GO:0005524,GO:0009733,GO:0019788,GO:0045116	ATP binding|response to auxin|NEDD8 transferase activity|protein neddylation	path:mdm04120	Ubiquitin mediated proteolysis
LOC103401883	2.11185	2.39363	1.97104	0.680316	0.432087	0.662125		nitrate reductase [NADH]	GO:0006809,GO:0009703,GO:0020037,GO:0030151,GO:0042128,GO:0043546,GO:0050464	nitric oxide biosynthetic process|nitrate reductase (NADH) activity|heme binding|molybdenum ion binding|nitrate assimilation|molybdopterin cofactor binding|nitrate reductase (NADPH) activity	path:mdm00910	Nitrogen metabolism
LOC103401884	12.1104	13.8072	13.7494	11.9535	11.4123	11.1338	UGT74E2	UDP-glycosyltransferase 74E2-like	GO:0008194,GO:0010016,GO:0035251,GO:0042631,GO:0043231,GO:0052638,GO:0070301,GO:0071215,GO:0071475,GO:0080024,GO:0080043,GO:0080044,GO:0080167	UDP-glycosyltransferase activity|shoot system morphogenesis|UDP-glucosyltransferase activity|cellular response to water deprivation|intracellular membrane-bounded organelle|indole-3-butyrate beta-glucosyltransferase activity|cellular response to hydrogen peroxide|cellular response to abscisic acid stimulus|cellular hyperosmotic salinity response|indolebutyric acid metabolic process|quercetin 3-O-…
LOC103401885	18.2798	16.4615	22.6932	46.7617	15.7436	13.5861	CML29	probable calcium-binding protein CML29	GO:0005509	calcium ion binding
LOC103401888	1.58131	2.1528	2.05129	3.62507	3.36952	4.8411	PIP5K1	phosphatidylinositol 4-phosphate 5-kinase 1-like	GO:0003785,GO:0005524,GO:0005886,GO:0016307,GO:0016308,GO:0051015	actin monomer binding|ATP binding|plasma membrane|phosphatidylinositol phosphate kinase activity|1-phosphatidylinositol-4-phosphate 5-kinase activity|actin filament binding	path:mdm00562,path:mdm04070,path:mdm04144	Inositol phosphate metabolism|Phosphatidylinositol signaling system|Endocytosis
LOC103401889	44.6365	41.843	33.5102	24.9111	30.5551	24.9594	UBC5	ubiquitin-conjugating enzyme E2-23 kDa-like	GO:0004842,GO:0005524,GO:0005829,GO:0006511,GO:0061631	ubiquitin-protein transferase activity|ATP binding|cytosol|ubiquitin-dependent protein catabolic process|ubiquitin conjugating enzyme activity	path:mdm04120	Ubiquitin mediated proteolysis
LOC103401890	8.82699	10.6025	8.46729	8.27082	5.95052	8.62489	BRM	ATP-dependent helicase BRM-like	GO:0003677,GO:0003682,GO:0004386,GO:0005524,GO:0005634,GO:0005829,GO:0006355,GO:0007275,GO:0008094,GO:0010199,GO:0040029,GO:0043044,GO:1900036,GO:1903798	DNA binding|chromatin binding|helicase activity|ATP binding|nucleus|cytosol|regulation of transcription, DNA-templated|multicellular organism development|DNA-dependent ATPase activity|organ boundary specification between lateral organs and the meristem|regulation of gene expression, epigenetic|ATP-dependent chromatin remodeling|positive regulation of cellular response to heat|regulation of produc…
LOC103401891	715.744	1080.56	841.012	941.347	1242.27	988.908	CAS1	L-3-cyanoalanine synthase 1, mitochondrial	GO:0004124,GO:0005739,GO:0006535,GO:0009611,GO:0009836,GO:0019499,GO:0050017	cysteine synthase activity|mitochondrion|cysteine biosynthetic process from serine|response to wounding|fruit ripening, climacteric|cyanide metabolic process|L-3-cyanoalanine synthase activity	path:mdm00270,path:mdm00460,path:mdm00920	Cysteine and methionine metabolism|Cyanoamino acid metabolism|Sulfur metabolism
LOC103401892	7.06258	7.37332	8.87147	6.24102	8.77671	6.72793	UBP4	uncharacterized LOC103401892	GO:0004197,GO:0004843,GO:0005634,GO:0006511,GO:0016579	cysteine-type endopeptidase activity|thiol-dependent ubiquitin-specific protease activity|nucleus|ubiquitin-dependent protein catabolic process|protein deubiquitination
LOC103401893	97.1134	93.8244	105.972	74.9474	70.4934	67.861	ATI1	ATG8-interacting protein 1-like	GO:0005783,GO:0005789,GO:0005829,GO:0009570,GO:0016021,GO:0031969,GO:0043231,GO:0071211,GO:1904962	endoplasmic reticulum|endoplasmic reticulum membrane|cytosol|chloroplast stroma|integral component of membrane|chloroplast membrane|intracellular membrane-bounded organelle|protein targeting to vacuole involved in autophagy|plastid to vacuole vesicle-mediated transport
LOC103401894	0.0323867	0.0473048	0.0736509	0.0170144	0.0930367	0.0867038	CYP86A2	cytochrome P450 86A8	GO:0005506,GO:0006631,GO:0006952,GO:0016021,GO:0018685,GO:0020037,GO:0070330	iron ion binding|fatty acid metabolic process|defense response|integral component of membrane|alkane 1-monooxygenase activity|heme binding|aromatase activity	path:mdm00073	Cutin, suberine and wax biosynthesis
LOC103401895	7.28982	6.37765	7.72835	6.59877	2.86289	4.67435	PHT4	ascorbate transporter, chloroplastic-like	GO:0005315,GO:0009507,GO:0009536,GO:0009706,GO:0009941,GO:0010028,GO:0015229,GO:0015882,GO:0016021	inorganic phosphate transmembrane transporter activity|chloroplast|plastid|chloroplast inner membrane|chloroplast envelope|xanthophyll cycle|L-ascorbic acid transmembrane transporter activity|L-ascorbic acid transmembrane transport|integral component of membrane
LOC103401897	29.0512	27.7674	27.8228	31.7165	34.6377	29.811		uncharacterized LOC103401897
LOC103401898	1.46178	1.46712	1.47498	1.62686	1.42909	1.64769	GPAT8	probable glycerol-3-phosphate acyltransferase 8	GO:0004366,GO:0005783,GO:0010143,GO:0016020,GO:0016021,GO:0016024,GO:0016791,GO:0090447,GO:0102420	glycerol-3-phosphate O-acyltransferase activity|endoplasmic reticulum|cutin biosynthetic process|membrane|integral component of membrane|CDP-diacylglycerol biosynthetic process|phosphatase activity|glycerol-3-phosphate 2-O-acyltransferase activity|sn-1-glycerol-3-phosphate C16:0-DCA-CoA acyl transferase activity	path:mdm00561,path:mdm00564	Glycerolipid metabolism|Glycerophospholipid metabolism
LOC103401899	16.0111	15.0815	16.474	13.1	13.1986	10.8031		uncharacterized LOC103401899
LOC103401900	9.29733	8.20766	7.34766	8.14073	5.87944	8.24387	SPPL4	signal peptide peptidase-like 4	GO:0005765,GO:0010008,GO:0030660,GO:0033619,GO:0042500,GO:0071458,GO:0071556	lysosomal membrane|endosome membrane|Golgi-associated vesicle membrane|membrane protein proteolysis|aspartic endopeptidase activity, intramembrane cleaving|integral component of cytoplasmic side of endoplasmic reticulum membrane|integral component of lumenal side of endoplasmic reticulum membrane
LOC103401901	31.2839	29.9184	29.8313	30.3254	23.2918	28.35	PUB33	U-box domain-containing protein 33
LOC103401902	0.274737	0.236074	0.240116	0.0952406	0.0953173	0.117544	TRM32	uncharacterized LOC103401902
LOC103401903	1.11237	0.562429	0.595602	0.217962	0.696631	0.334254		uncharacterized LOC103401903
LOC103401905	0.0212289	0	0	0	0	0	ROPGEF2	rop guanine nucleotide exchange factor 2	GO:0005089	Rho guanyl-nucleotide exchange factor activity
LOC103401906	3.78774	4.12743	3.7594	4.06093	3.46729	3.87685	MED12	mediator of RNA polymerase II transcription subunit 12	GO:0003712,GO:0005634,GO:0006357,GO:0007275,GO:0016592,GO:0040008,GO:0040034,GO:0090213	transcription coregulator activity|nucleus|regulation of transcription by RNA polymerase II|multicellular organism development|mediator complex|regulation of growth|regulation of development, heterochronic|regulation of radial pattern formation
LOC103401908	3.69474	3.44597	4.34413	0.563743	0.34191	0.421264		uncharacterized LOC103401908
LOC103401910	15.4098	15.1064	14.9981	7.47476	6.24802	8.27546	BAM2	beta-amylase 2, chloroplastic	GO:0000272,GO:0009507,GO:0009570,GO:0016161,GO:0102229	polysaccharide catabolic process|chloroplast|chloroplast stroma|beta-amylase activity|amylopectin maltohydrolase activity	path:mdm00500	Starch and sucrose metabolism
LOC103401911	33.3546	31.565	31.204	22.4731	39.745	30.3696		uncharacterized LOC103401911
LOC103401912	0	0	0	0	0	0		vestitone reductase-like	GO:0006952,GO:0009813,GO:0016491,GO:0050662	defense response|flavonoid biosynthetic process|oxidoreductase activity|coenzyme binding
LOC103401914	4.26016	5.72452	4.92441	5.20285	4.36531	4.48452	BAM7	beta-amylase 7	GO:0000272,GO:0003700,GO:0005634,GO:0005737,GO:0016161,GO:0048831,GO:0102229	polysaccharide catabolic process|DNA-binding transcription factor activity|nucleus|cytoplasm|beta-amylase activity|regulation of shoot system development|amylopectin maltohydrolase activity	path:mdm00500	Starch and sucrose metabolism
LOC103401917	2.6167	2.32059	2.23357	1.93338	2.06159	2.51148		uncharacterized LOC103401917
LOC103401918	0.0441984	0.149814	0.0748805	0	0.0626575	0	AHL11	AT-hook motif nuclear-localized protein 9	GO:0003677,GO:0005634	DNA binding|nucleus
LOC103401919	6.66738	7.82893	10.73	6.0902	6.78975	5.034	At2g23790	calcium uniporter protein 2, mitochondrial	GO:0005262,GO:0005743,GO:0015292,GO:0016021,GO:0051560	calcium channel activity|mitochondrial inner membrane|uniporter activity|integral component of membrane|mitochondrial calcium ion homeostasis
LOC103401920	0	0	0	0	0	0		protein FAF-like, chloroplastic
LOC103401922	0.0619051	0	0.052104	0.0482587	0.0289024	0.161442	N	TMV resistance protein N-like	GO:0005524,GO:0005737,GO:0007165,GO:0009626,GO:0043531	ATP binding|cytoplasm|signal transduction|plant-type hypersensitive response|ADP binding
LOC103401923	12.7811	11.6364	13.2629	11.6988	11.3165	10.8802		uncharacterized LOC103401923
LOC103401926	30.3	35.1289	34.0739	26.1391	22.3096	21.0787	mge1	protein GrpE-like	GO:0000774,GO:0001405,GO:0006457,GO:0030150,GO:0042803,GO:0051082,GO:0051087	adenyl-nucleotide exchange factor activity|PAM complex, Tim23 associated import motor|protein folding|protein import into mitochondrial matrix|protein homodimerization activity|unfolded protein binding|chaperone binding
LOC103401927	7.96544	9.68202	9.15213	10.3563	9.9665	9.23178	VPS9A	vacuolar protein sorting-associated protein 9A-like	GO:0000919,GO:0005089,GO:0005096,GO:0005525,GO:0005634,GO:0005829,GO:0009793,GO:0016020,GO:0042546,GO:0045324,GO:0048528	cell plate assembly|Rho guanyl-nucleotide exchange factor activity|GTPase activator activity|GTP binding|nucleus|cytosol|embryo development ending in seed dormancy|membrane|cell wall biogenesis|late endosome to vacuole transport|post-embryonic root development
LOC103401929	2.64526	1.33134	2.36086	0.0856308	0.0772232	0.0214909	SCPL18	serine carboxypeptidase-like 1	GO:0004185,GO:0005576,GO:0019748	serine-type carboxypeptidase activity|extracellular region|secondary metabolic process
LOC103401930	6.20037	5.93502	6.27256	7.45543	7.63515	6.73904	MEKK1	mitogen-activated protein kinase kinase kinase 1-like	GO:0000165,GO:0003677,GO:0004674,GO:0004709,GO:0005524,GO:0005634,GO:0005737,GO:0005768,GO:0005886,GO:0006970,GO:0009409,GO:0009611,GO:0009631,GO:0009651,GO:0010449,GO:0019900,GO:0022622,GO:0023014,GO:0031098,GO:0032147,GO:0045087,GO:0046777,GO:1902065	MAPK cascade|DNA binding|protein serine/threonine kinase activity|MAP kinase kinase kinase activity|ATP binding|nucleus|cytoplasm|endosome|plasma membrane|response to osmotic stress|response to cold|response to wounding|cold acclimation|response to salt stress|root meristem growth|kinase binding|root system development|signal transduction by protein phosphorylation|stress-activated protein kinase…	path:mdm04016,path:mdm04626	MAPK signaling pathway - plant|Plant-pathogen interaction
LOC103401933	0	0	0	0	0	0		uncharacterized LOC103401933
LOC103401937	0.463865	0.208427	0.518937	1.11609	2.26217	1.52457	PAIR1	protein PAIR1	GO:0005634,GO:0009553,GO:0009554,GO:0009556,GO:0042138,GO:0070192	nucleus|embryo sac development|megasporogenesis|microsporogenesis|meiotic DNA double-strand break formation|chromosome organization involved in meiotic cell cycle
LOC103401938	0	0	0	0	0	0	ERG3	elicitor-responsive protein 3
LOC103401939	19.0358	17.5125	16.3355	19.4746	26.64	18.7303	RMA1H1	E3 ubiquitin-protein ligase RNF185	GO:0004842,GO:0005789,GO:0006970,GO:0009409,GO:0009414,GO:0009611,GO:0009723,GO:0016021,GO:0016567,GO:0043161,GO:0046872	ubiquitin-protein transferase activity|endoplasmic reticulum membrane|response to osmotic stress|response to cold|response to water deprivation|response to wounding|response to ethylene|integral component of membrane|protein ubiquitination|proteasome-mediated ubiquitin-dependent protein catabolic process|metal ion binding	path:mdm04141	Protein processing in endoplasmic reticulum
LOC103401941	0	0.0280106	0.0653564	0	0.0272263	0.0304625	CKX4	cytokinin dehydrogenase 4-like	GO:0005615,GO:0008131,GO:0009823,GO:0019139,GO:0071949	extracellular space|primary amine oxidase activity|cytokinin catabolic process|cytokinin dehydrogenase activity|FAD binding	path:mdm00908	Zeatin biosynthesis
LOC103401945	0.047689	0	0.0533376	0	0	0	LRK10	rust resistance kinase Lr10-like	GO:0004674,GO:0005524,GO:0005886,GO:0016021	protein serine/threonine kinase activity|ATP binding|plasma membrane|integral component of membrane
LOC103401948	0	0.125087	0.145459	0.0663604	0.0612461	0.0684553	At3g61320	UPF0187 protein At3g61320, chloroplastic	GO:0005247,GO:0009507,GO:0009533,GO:0010027,GO:0016021,GO:0019684,GO:0031969,GO:0042548,GO:0042651	voltage-gated chloride channel activity|chloroplast|chloroplast stromal thylakoid|thylakoid membrane organization|integral component of membrane|photosynthesis, light reaction|chloroplast membrane|regulation of photosynthesis, light reaction|thylakoid membrane
LOC103401949	0	0	0	0.0282398	0.0790963	0.177211	GATL1	probable galacturonosyltransferase-like 1	GO:0005783,GO:0005789,GO:0005794,GO:0010051,GO:0010417,GO:0016021,GO:0032504,GO:0045489,GO:0047262,GO:0048366,GO:0052386	endoplasmic reticulum|endoplasmic reticulum membrane|Golgi apparatus|xylem and phloem pattern formation|glucuronoxylan biosynthetic process|integral component of membrane|multicellular organism reproduction|pectin biosynthetic process|polygalacturonate 4-alpha-galacturonosyltransferase activity|leaf development|cell wall thickening
LOC103401951	6.38871	6.67838	7.86618	1.64522	0.894675	0.928323	PUP3	purine permease 3-like	GO:0005345,GO:0006863,GO:0016020,GO:0016021	purine nucleobase transmembrane transporter activity|purine nucleobase transport|membrane|integral component of membrane
LOC103401952	1.73249	1.63024	1.77122	1.09416	0.983326	1.47618	ATJ1	chaperone protein dnaJ 1, mitochondrial	GO:0005524,GO:0005739,GO:0006457,GO:0009408,GO:0031072,GO:0046872,GO:0051082	ATP binding|mitochondrion|protein folding|response to heat|heat shock protein binding|metal ion binding|unfolded protein binding
LOC103401953	0.562071	0.416469	0.485617	0.586743	0.330818	0.341038	At5g27460	pentatricopeptide repeat-containing protein At5g27460
LOC103401954	7.57043	6.48416	8.5776	2.99331	3.15863	3.62835	PUR7	phosphoribosylaminoimidazole-succinocarboxamide synthase, chloroplastic	GO:0004639,GO:0005524,GO:0006189,GO:0009507,GO:0009570,GO:0009733	phosphoribosylaminoimidazolesuccinocarboxamide synthase activity|ATP binding|'de novo' IMP biosynthetic process|chloroplast|chloroplast stroma|response to auxin	path:mdm00230	Purine metabolism
LOC103401955	10.7424	9.77853	10.009	6.70226	8.02342	8.09441	PEPKR2	serine/threonine-protein kinase PEPKR2	GO:0004683,GO:0005524,GO:0005634,GO:0005737,GO:0009738,GO:0009931,GO:0018105,GO:0035556	calmodulin-dependent protein kinase activity|ATP binding|nucleus|cytoplasm|abscisic acid-activated signaling pathway|calcium-dependent protein serine/threonine kinase activity|peptidyl-serine phosphorylation|intracellular signal transduction
LOC103401957	0	0.0234548	0.109064	0	0.0912982	0		uncharacterized LOC103401957
LOC103401958	29.8235	27.5876	27.6403	26.4238	31.6804	22.4362	At4g14600	bet1-like protein At4g14600	GO:0000139,GO:0005789,GO:0005886,GO:0015031,GO:0016021,GO:0016192	Golgi membrane|endoplasmic reticulum membrane|plasma membrane|protein transport|integral component of membrane|vesicle-mediated transport	path:mdm04130	SNARE interactions in vesicular transport
LOC103401959	21.5238	21.1357	21.1397	14.075	13.4569	13.8409	PPOX1	pyridoxine/pyridoxamine 5'-phosphate oxidase 1, chloroplastic	GO:0004733,GO:0005739,GO:0005829,GO:0006734,GO:0006739,GO:0008615,GO:0009507,GO:0010181,GO:0046872,GO:0052856,GO:0052857	pyridoxamine-phosphate oxidase activity|mitochondrion|cytosol|NADH metabolic process|NADP metabolic process|pyridoxine biosynthetic process|chloroplast|FMN binding|metal ion binding|NADHX epimerase activity|NADPHX epimerase activity	path:mdm00750	Vitamin B6 metabolism
LOC103401960	5.27808	6.29219	5.1072	7.53356	6.46117	6.65954	At5g49980	transport inhibitor response 1-like protein	GO:0000822,GO:0005634,GO:0009734,GO:0010011,GO:0016567,GO:0019005,GO:0031146	inositol hexakisphosphate binding|nucleus|auxin-activated signaling pathway|auxin binding|protein ubiquitination|SCF ubiquitin ligase complex|SCF-dependent proteasomal ubiquitin-dependent protein catabolic process
LOC103401962	65.6619	64.3295	66.1253	65.5819	64.6143	68.5094	FIP1	GEM-like protein 1
LOC103401963	0	0.0215047	0	0	0	0	ZHD1	zinc-finger homeodomain protein 2-like	GO:0003677,GO:0005634,GO:0046872	DNA binding|nucleus|metal ion binding
LOC103401964	0.146743	0.101179	0.302898	0.309565	0.314099	0.223555	At1g28390	serine/threonine-protein kinase-like protein At1g28390
LOC103401965	20.766	19.5598	18.5841	19.6382	21.0365	26.2526	SAC51	transcription factor bHLH145	GO:0003677,GO:0003700,GO:0005634,GO:0006355,GO:0009826,GO:0046983	DNA binding|DNA-binding transcription factor activity|nucleus|regulation of transcription, DNA-templated|unidimensional cell growth|protein dimerization activity
LOC103401966	18.9942	15.449	17.8006	14.2185	11.4942	12.5409	iqw1	WD and tetratricopeptide repeats protein 1	GO:0005829,GO:0070647,GO:0080008	cytosol|protein modification by small protein conjugation or removal|Cul4-RING E3 ubiquitin ligase complex
LOC103401967	34.504	26.7394	27.0709	39.4358	42.4401	37.5819		uncharacterized LOC103401967
LOC103401968	21.5873	19.4939	21.4156	17.6421	15.9348	14.8594	SPBC3E7.11c	chaperone protein DnaJ-like	GO:0005829,GO:0016558,GO:0030544,GO:0045040	cytosol|protein import into peroxisome matrix|Hsp70 protein binding|protein import into mitochondrial outer membrane
LOC103401969	89.3853	56.1542	75.052	82.174	78.7051	61.2981	CUTA	protein CutA, chloroplastic	GO:0005507,GO:0009507,GO:0010038,GO:0031972	copper ion binding|chloroplast|response to metal ion|chloroplast intermembrane space
LOC103401970	0.273481	0.395652	0.255499	0.847561	0.687683	0.454713	LYK4	lysM domain receptor-like kinase 4
LOC103401971	10.2098	9.80489	5.62436	2.31205	4.14513	4.78504	CYCD2-1	cyclin-D2-1-like	GO:0000079,GO:0000278,GO:0000307,GO:0005634,GO:0005737,GO:0006468,GO:0007088,GO:0008284,GO:0016538,GO:0019901,GO:0045787,GO:0051301	regulation of cyclin-dependent protein serine/threonine kinase activity|mitotic cell cycle|cyclin-dependent protein kinase holoenzyme complex|nucleus|cytoplasm|protein phosphorylation|regulation of mitotic nuclear division|positive regulation of cell proliferation|cyclin-dependent protein serine/threonine kinase regulator activity|protein kinase binding|positive regulation of cell cycle|cell divi…
LOC103401972	40.1778	42.2676	39.9013	49.0202	45.2917	47.7562	PGI1	glucose-6-phosphate isomerase 1, chloroplastic-like	GO:0004347,GO:0005829,GO:0005982,GO:0006094,GO:0006096,GO:0009507,GO:0009536,GO:0009570,GO:0009911,GO:0009941,GO:0016866,GO:0048029,GO:0051156	glucose-6-phosphate isomerase activity|cytosol|starch metabolic process|gluconeogenesis|glycolytic process|chloroplast|plastid|chloroplast stroma|positive regulation of flower development|chloroplast envelope|intramolecular transferase activity|monosaccharide binding|glucose 6-phosphate metabolic process	path:mdm00010,path:mdm00030,path:mdm00500,path:mdm00520	Glycolysis / Gluconeogenesis|Pentose phosphate pathway|Starch and sucrose metabolism|Amino sugar and nucleotide sugar metabolism
LOC103401973	3.18003	6.25689	4.33734	5.37768	7.54034	9.50894		uncharacterized LOC103401973
LOC103401977	0.106095	0.102002	0	0.0735014	0.0331495	0.184136		uncharacterized LOC103401977
LOC103401978	3.35401	2.98563	2.41807	2.84203	4.43427	2.95801		uncharacterized LOC103401978
LOC103401979	27.7567	27.1837	28.9596	27.8448	30.3259	26.1455		uncharacterized LOC103401979
LOC103401980	9.50443	8.26071	8.59568	7.0232	7.06214	9.38301	REN1	rho GTPase-activating protein REN1	GO:0005096,GO:0005938,GO:0007165,GO:0009846,GO:0009860,GO:0009865,GO:0016324,GO:0017048,GO:0035024,GO:0040008,GO:0043547,GO:0045177,GO:0048868,GO:0070382,GO:0090406,GO:0090630	GTPase activator activity|cell cortex|signal transduction|pollen germination|pollen tube growth|pollen tube adhesion|apical plasma membrane|Rho GTPase binding|negative regulation of Rho protein signal transduction|regulation of growth|positive regulation of GTPase activity|apical part of cell|pollen tube development|exocytic vesicle|pollen tube|activation of GTPase activity
LOC103401981	9.56456	7.80558	7.19159	4.67543	4.68527	4.72712	DAR1	protein DA1-related 1-like	GO:0005886,GO:0032875,GO:0043130,GO:0046872	plasma membrane|regulation of DNA endoreduplication|ubiquitin binding|metal ion binding
LOC103401982	127.032	158.903	134.556	96.6786	97.3141	113.945	PUMP5	mitochondrial uncoupling protein 5-like	GO:0005310,GO:0005743,GO:0006839,GO:0008272,GO:0015116,GO:0015117,GO:0015131,GO:0015140,GO:0015141,GO:0015297,GO:0015709,GO:0015729,GO:0016021,GO:0017077,GO:0035435,GO:0071422,GO:0071423,GO:1902600	dicarboxylic acid transmembrane transporter activity|mitochondrial inner membrane|mitochondrial transport|sulfate transport|sulfate transmembrane transporter activity|thiosulfate transmembrane transporter activity|oxaloacetate transmembrane transporter activity|malate transmembrane transporter activity|succinate transmembrane transporter activity|antiporter activity|thiosulfate transport|oxaloace…
LOC103401984	21.7333	21.3097	22.9165	26.3331	18.24	23.8576	TIF3C1	eukaryotic translation initiation factor 3 subunit C	GO:0001732,GO:0003743,GO:0005852,GO:0016282,GO:0031369,GO:0033290	formation of cytoplasmic translation initiation complex|translation initiation factor activity|eukaryotic translation initiation factor 3 complex|eukaryotic 43S preinitiation complex|translation initiation factor binding|eukaryotic 48S preinitiation complex	path:mdm03013	RNA transport
LOC103401985	5.76478	6.88767	6.60217	5.09769	4.00632	6.06792	UBP16	ubiquitin carboxyl-terminal hydrolase 17	GO:0004197,GO:0004843,GO:0006511,GO:0008283,GO:0009651,GO:0009908,GO:0016021,GO:0016579,GO:0036459,GO:0046872,GO:0048364,GO:0048366,GO:0048367,GO:1901000	cysteine-type endopeptidase activity|thiol-dependent ubiquitin-specific protease activity|ubiquitin-dependent protein catabolic process|cell proliferation|response to salt stress|flower development|integral component of membrane|protein deubiquitination|thiol-dependent ubiquitinyl hydrolase activity|metal ion binding|root development|leaf development|shoot system development|regulation of respons…
LOC103401986	15.8042	18.4115	19.2845	14.6576	15.4927	17.0003	AP4M	AP-4 complex subunit mu-like	GO:0005802,GO:0005829,GO:0005905,GO:0006886,GO:0016192,GO:0030124,GO:0030131	trans-Golgi network|cytosol|clathrin-coated pit|intracellular protein transport|vesicle-mediated transport|AP-4 adaptor complex|clathrin adaptor complex
LOC103401987	7.43961	7.42725	7.45773	6.53578	5.71431	6.77582	ULP2B	probable ubiquitin-like-specific protease 2B	GO:0016926,GO:0070139	protein desumoylation|SUMO-specific endopeptidase activity
LOC103401988	0.843257	0.685061	0.704781	0.605526	1.11849	0.946639	KIN4C	kinesin-like protein KIN-4C	GO:0003777,GO:0005524,GO:0005871,GO:0005874,GO:0007018,GO:0007052,GO:0008017,GO:0009506,GO:0016887,GO:0071555	microtubule motor activity|ATP binding|kinesin complex|microtubule|microtubule-based movement|mitotic spindle organization|microtubule binding|plasmodesma|ATPase activity|cell wall organization
LOC103401989	2.37332	1.5366	1.44316	1.33969	1.07964	1.67202		uncharacterized LOC103401989
LOC103401990	4.10765	5.04261	5.41398	6.49888	4.75557	5.02949	At2g37230	pentatricopeptide repeat-containing protein At2g37230-like
LOC103401991	0	0	0	0	0	0	NET2A	protein NETWORKED 2A	GO:0005886,GO:0051015	plasma membrane|actin filament binding
LOC103401992	0.316346	0.55843	0.356479	0.27179	0.915732	0.479745		uncharacterized LOC103401992
LOC103401993	3.22096	3.64855	3.68425	3.96089	6.2105	3.83546	KIN4C	kinesin-like protein KIN-4C	GO:0003777,GO:0005524,GO:0005871,GO:0005874,GO:0007018,GO:0007052,GO:0008017,GO:0009506,GO:0016887,GO:0071555	microtubule motor activity|ATP binding|kinesin complex|microtubule|microtubule-based movement|mitotic spindle organization|microtubule binding|plasmodesma|ATPase activity|cell wall organization
LOC103401995	32.7331	38.2838	38.7259	49.231	46.3648	48.5283		NADPH--cytochrome P450 reductase	GO:0003958,GO:0005789,GO:0010181,GO:0016021,GO:0050660,GO:0050661	NADPH-hemoprotein reductase activity|endoplasmic reticulum membrane|FMN binding|integral component of membrane|flavin adenine dinucleotide binding|NADP binding
LOC103401996	0.696263	0.162073	0.68793	0.492788	0.341248	0.588878	CER2	protein ECERIFERUM 2	GO:0005634,GO:0005783,GO:0009555,GO:0010025,GO:0016747,GO:0042761,GO:0071555	nucleus|endoplasmic reticulum|pollen development|wax biosynthetic process|transferase activity, transferring acyl groups other than amino-acyl groups|very long-chain fatty acid biosynthetic process|cell wall organization
LOC103401998	4.75615	5.00799	4.5675	4.15479	2.97207	4.09357	RH40	DEAD-box ATP-dependent RNA helicase 40-like	GO:0000184,GO:0003723,GO:0004386,GO:0005524,GO:0005634,GO:0005773,GO:0006364	nuclear-transcribed mRNA catabolic process, nonsense-mediated decay|RNA binding|helicase activity|ATP binding|nucleus|vacuole|rRNA processing	path:mdm03040	Spliceosome
LOC103401999	5.29364	5.78719	6.30223	4.41837	4.01478	3.83236	RGTA1	geranylgeranyl transferase type-2 subunit alpha 1	GO:0004663,GO:0005737,GO:0005829,GO:0005968,GO:0018344,GO:0046686	Rab geranylgeranyltransferase activity|cytoplasm|cytosol|Rab-protein geranylgeranyltransferase complex|protein geranylgeranylation|response to cadmium ion
LOC103402000	5.58203	5.58735	6.11013	4.09318	2.72658	3.59888	DRB1	uncharacterized LOC103402000	GO:0003725,GO:0004525,GO:0005634,GO:0006396,GO:0009733,GO:0009735,GO:0009737,GO:0010267,GO:0010305,GO:0010445,GO:0010589,GO:0016607,GO:0030422,GO:0031053,GO:0031054,GO:0035196,GO:0035198,GO:0035279,GO:0042802	double-stranded RNA binding|ribonuclease III activity|nucleus|RNA processing|response to auxin|response to cytokinin|response to abscisic acid|production of ta-siRNAs involved in RNA interference|leaf vascular tissue pattern formation|nuclear dicing body|leaf proximal/distal pattern formation|nuclear speck|production of siRNA involved in RNA interference|primary miRNA processing|pre-miRNA process…
LOC103402002	0	0	0	0	0	0	NFP	serine/threonine receptor-like kinase NFP	GO:0002237,GO:0004713,GO:0005524,GO:0005775,GO:0005886,GO:0006486,GO:0006952,GO:0009877,GO:0016021,GO:1900150,GO:1902290	response to molecule of bacterial origin|protein tyrosine kinase activity|ATP binding|vacuolar lumen|plasma membrane|protein glycosylation|defense response|nodulation|integral component of membrane|regulation of defense response to fungus|positive regulation of defense response to oomycetes
LOC103402004	37.3984	47.5839	41.8483	36.2221	32.3025	37.9457		uncharacterized LOC103402004
LOC103402005	9.67186	9.8217	9.08379	7.23745	4.7194	8.32432	BCHB	BEACH domain-containing protein B	GO:0005739	mitochondrion
LOC103402007	8.92444	8.14422	7.51884	7.94444	5.80656	6.70643	GATA24	GATA transcription factor 24-like	GO:0003700,GO:0005634,GO:0008270,GO:0043565	DNA-binding transcription factor activity|nucleus|zinc ion binding|sequence-specific DNA binding
LOC103402008	18.1077	18.9313	19.4084	17.1082	15.3187	13.0759		WD repeat-containing protein 43			path:mdm03008	Ribosome biogenesis in eukaryotes
LOC103402009	0.112325	0.180394	0.125849	0.777802	0.490676	0.90279		uncharacterized LOC103402009
LOC103402010	6.93979	5.0476	5.06131	3.79291	3.58043	3.1624	At3g50780	BTB/POZ domain-containing protein At3g50780-like	GO:0016567	protein ubiquitination
LOC103402011	3.61135	4.48999	4.05921	3.57702	2.88878	4.36687	SAB	protein SABRE	GO:0005576,GO:0005794,GO:0007275,GO:0010105,GO:0016036,GO:0030307	extracellular region|Golgi apparatus|multicellular organism development|negative regulation of ethylene-activated signaling pathway|cellular response to phosphate starvation|positive regulation of cell growth
LOC103402013	17.6648	18.9397	17.192	15.7423	8.40001	14.3274	UPL1	E3 ubiquitin-protein ligase UPL2-like	GO:0000151,GO:0004842,GO:0005737,GO:0005739,GO:0005829,GO:0009506,GO:0016020,GO:0016567,GO:0061630	ubiquitin ligase complex|ubiquitin-protein transferase activity|cytoplasm|mitochondrion|cytosol|plasmodesma|membrane|protein ubiquitination|ubiquitin protein ligase activity	path:mdm04120	Ubiquitin mediated proteolysis
LOC103402014	20.9986	17.4447	20.7633	19.4506	14.8804	18.1403	HUB2	E3 ubiquitin-protein ligase BRE1-like 2	GO:0004842,GO:0005634,GO:0009965,GO:0010162,GO:0010228,GO:0010390,GO:0033523,GO:0042803,GO:0045087,GO:0046872	ubiquitin-protein transferase activity|nucleus|leaf morphogenesis|seed dormancy process|vegetative to reproductive phase transition of meristem|histone monoubiquitination|histone H2B ubiquitination|protein homodimerization activity|innate immune response|metal ion binding
LOC103402015	0	0	0	0	0	0	rglB	probable rhamnogalacturonate lyase B	GO:0000272,GO:0005576,GO:0030246,GO:0071555,GO:0102210	polysaccharide catabolic process|extracellular region|carbohydrate binding|cell wall organization|rhamnogalacturonan endolyase activity
LOC103402018	0	0	0	0	0	0	AGL16	MADS-box transcription factor 23	GO:0000977,GO:0003700,GO:0005634,GO:0008134,GO:0009908,GO:0010440,GO:0042803,GO:0045944	RNA polymerase II regulatory region sequence-specific DNA binding|DNA-binding transcription factor activity|nucleus|transcription factor binding|flower development|stomatal lineage progression|protein homodimerization activity|positive regulation of transcription by RNA polymerase II
LOC103402019	2.7251	2.63446	2.53992	1.21793	0.688083	1.2683	SUVR5	histone-lysine N-methyltransferase SUVR5-like	GO:0003700,GO:0005634,GO:0005694,GO:0006338,GO:0006342,GO:0008270,GO:0018024,GO:0034968,GO:0043565,GO:1900109	DNA-binding transcription factor activity|nucleus|chromosome|chromatin remodeling|chromatin silencing|zinc ion binding|histone-lysine N-methyltransferase activity|histone lysine methylation|sequence-specific DNA binding|regulation of histone H3-K9 dimethylation
LOC103402020	41.2763	66.6461	48.5701	139.798	153.408	146.236	OPT2	oligopeptide transporter 2-like	GO:0005886,GO:0005887,GO:0015031,GO:0016020,GO:0035673	plasma membrane|integral component of plasma membrane|protein transport|membrane|oligopeptide transmembrane transporter activity
LOC103402021	1.41457	2.26728	1.74671	1.5781	0.884618	0.855852	At1g09900	pentatricopeptide repeat-containing protein At1g09900
LOC103402023	16.6525	18.732	17.1081	23.1142	25.0396	25.5017		serine hydroxymethyltransferase, mitochondrial	GO:0004372,GO:0005739,GO:0019264,GO:0030170,GO:0035999	glycine hydroxymethyltransferase activity|mitochondrion|glycine biosynthetic process from serine|pyridoxal phosphate binding|tetrahydrofolate interconversion	path:mdm00260,path:mdm00460,path:mdm00630,path:mdm00670	Glycine, serine and threonine metabolism|Cyanoamino acid metabolism|Glyoxylate and dicarboxylate metabolism|One carbon pool by folate
LOC103402024	1.27255	1.12575	0.98599	0.662433	0.418066	0.575167	PCMP-H12	pentatricopeptide repeat-containing protein At3g29230
LOC103402025	0.21302	0.0682658	0.219331	0.0369837	0.0663668	0	LECRK3	G-type lectin S-receptor-like serine/threonine-protein kinase LECRK3	GO:0004674,GO:0005524,GO:0005886,GO:0006468,GO:0006952,GO:0016021,GO:0030246	protein serine/threonine kinase activity|ATP binding|plasma membrane|protein phosphorylation|defense response|integral component of membrane|carbohydrate binding
LOC103402026	11.5317	15.1815	14.7722	13.1028	11.3237	10.8522	HEMA1	glutamyl-tRNA reductase 1, chloroplastic-like	GO:0006782,GO:0008883,GO:0009507,GO:0015995,GO:0050661	protoporphyrinogen IX biosynthetic process|glutamyl-tRNA reductase activity|chloroplast|chlorophyll biosynthetic process|NADP binding	path:mdm00860	Porphyrin and chlorophyll metabolism
LOC103402027	0	0	0	0	0	0	WAV3	E3 ubiquitin-protein ligase WAV3	GO:0005886,GO:0009630,GO:0016567,GO:0046872,GO:0048364,GO:0061630	plasma membrane|gravitropism|protein ubiquitination|metal ion binding|root development|ubiquitin protein ligase activity
LOC103402028	7.46577	7.10737	6.69389	11.716	11.0329	9.30723	IAA9	auxin-responsive protein IAA9-like	GO:0003700,GO:0005634,GO:0009733,GO:0009734,GO:0043565	DNA-binding transcription factor activity|nucleus|response to auxin|auxin-activated signaling pathway|sequence-specific DNA binding	path:mdm04075	Plant hormone signal transduction
LOC103402029	1.23046	6.98065	1.76281	7.28534	24.8687	1.63542	At5g65660	uncharacterized protein At5g65660-like	GO:0005886,GO:0016021	plasma membrane|integral component of membrane
LOC103402030	0	0	0	0	0	0	BHLH93	transcription factor bHLH93-like	GO:0003677,GO:0003700,GO:0005634,GO:0007275,GO:0010371,GO:0045487,GO:0046983	DNA binding|DNA-binding transcription factor activity|nucleus|multicellular organism development|regulation of gibberellin biosynthetic process|gibberellin catabolic process|protein dimerization activity
LOC103402032	23.8637	28.3159	27.6704	25.9458	44.9586	30.1062	At1g27530	ubiquitin-fold modifier-conjugating enzyme 1	GO:0071568,GO:1990592	UFM1 transferase activity|protein K69-linked ufmylation
LOC103402033	27.7441	31.1665	33.856	48.5281	43.3641	47.0997		uncharacterized LOC103402033
LOC103402034	3.61098	4.38931	4.51593	3.71065	2.79556	3.17017		uncharacterized LOC103402034
LOC103402035	0.34438	0.452879	0.724809	1.30407	1.71398	0.812659	WAKL14	wall-associated receptor kinase-like 14
LOC103402037	0.385012	0.541698	0.774404	1.08851	0.408939	1.10298	DTX48	protein DETOXIFICATION 48-like	GO:0000139,GO:0005381,GO:0005770,GO:0005794,GO:0006826,GO:0006855,GO:0006970,GO:0009408,GO:0009624,GO:0009646,GO:0009737,GO:0010015,GO:0015238,GO:0015297,GO:0015893,GO:0016021,GO:0017119,GO:0031902,GO:0043226,GO:0055072,GO:1905428	Golgi membrane|iron ion transmembrane transporter activity|late endosome|Golgi apparatus|iron ion transport|drug transmembrane transport|response to osmotic stress|response to heat|response to nematode|response to absence of light|response to abscisic acid|root morphogenesis|drug transmembrane transporter activity|antiporter activity|drug transport|integral component of membrane|Golgi transport c…
LOC103402039	8.12255	10.6874	7.55591	7.13503	5.03407	5.23782	RLK7	receptor-like protein kinase 7	GO:0001653,GO:0004672,GO:0004674,GO:0005524,GO:0005886,GO:0006979,GO:0009506,GO:0009845,GO:0016021,GO:0042802,GO:0045087,GO:0046777	peptide receptor activity|protein kinase activity|protein serine/threonine kinase activity|ATP binding|plasma membrane|response to oxidative stress|plasmodesma|seed germination|integral component of membrane|identical protein binding|innate immune response|protein autophosphorylation
LOC103402040	0	0.0213104	0.0247967	0	0	0	At3g47570	probable LRR receptor-like serine/threonine-protein kinase At3g47570
LOC103402041	0	0.0124147	0.0144571	0.0666982	0.024058	0.0402026	RGA1	putative disease resistance protein RGA1	GO:0005524,GO:0006952,GO:0043531	ATP binding|defense response|ADP binding
LOC103402046	2.23476	2.64742	2.16018	1.40475	0.865496	1.44823	RUS4	protein root UVB sensitive 4	GO:0016021	integral component of membrane
LOC103402050	0.189265	0.0909428	0.159388	0	0	0	MSL3	mechanosensitive ion channel protein 3, chloroplastic-like	GO:0006811,GO:0009526,GO:0010020,GO:0016021,GO:0031969,GO:0055085	ion transport|plastid envelope|chloroplast fission|integral component of membrane|chloroplast membrane|transmembrane transport
LOC103402054	0.583018	0.479281	0.621466	0.201085	0.23314	0.43422		uncharacterized LOC103402054
LOC103402058	3.81095	1.93225	1.52291	1.28268	0.678969	1.32466	CTR1	serine/threonine-protein kinase CTR1-like	GO:0001666,GO:0004674,GO:0004712,GO:0005524,GO:0005789,GO:0009686,GO:0009723,GO:0009744,GO:0009750,GO:0009873,GO:0010105,GO:0010182,GO:0046777,GO:0048510,GO:0071281,GO:2000035,GO:2000069	response to hypoxia|protein serine/threonine kinase activity|protein serine/threonine/tyrosine kinase activity|ATP binding|endoplasmic reticulum membrane|gibberellin biosynthetic process|response to ethylene|response to sucrose|response to fructose|ethylene-activated signaling pathway|negative regulation of ethylene-activated signaling pathway|sugar mediated signaling pathway|protein autophosphor…
LOC103402060	0	0	0.0489948	0	0	0	AGL80	agamous-like MADS-box protein AGL80	GO:0000982,GO:0000987,GO:0003700,GO:0005634,GO:0007275,GO:0008134,GO:0043078,GO:0043565,GO:0044212,GO:0045944,GO:0046983	transcription factor activity, RNA polymerase II proximal promoter sequence-specific DNA binding|proximal promoter sequence-specific DNA binding|DNA-binding transcription factor activity|nucleus|multicellular organism development|transcription factor binding|polar nucleus|sequence-specific DNA binding|transcription regulatory region DNA binding|positive regulation of transcription by RNA polymera…
LOC103402061	11.3038	12.052	11.8751	11.4362	8.66878	11.5964	XLG1	extra-large guanine nucleotide-binding protein 1	GO:0001664,GO:0003924,GO:0005525,GO:0005634,GO:0005834,GO:0007188,GO:0031683,GO:0046872	G protein-coupled receptor binding|GTPase activity|GTP binding|nucleus|heterotrimeric G-protein complex|adenylate cyclase-modulating G protein-coupled receptor signaling pathway|G-protein beta/gamma-subunit complex binding|metal ion binding
LOC103402067	0	0	0	0	0	0		uncharacterized LOC103402067
LOC103402068	0	0	0	0	0	0	OPT2	oligopeptide transporter 2-like	GO:0005886,GO:0005887,GO:0015031,GO:0016020,GO:0035673	plasma membrane|integral component of plasma membrane|protein transport|membrane|oligopeptide transmembrane transporter activity
LOC103402070	0	0	0	0	0	0	RPM1	disease resistance protein RPM1-like			path:mdm04626	Plant-pathogen interaction
LOC103402072	4.52316	4.42352	3.25698	2.87067	1.68917	3.1475	vps13a	uncharacterized LOC103402072	GO:0005768,GO:0005794,GO:0005829,GO:0006623,GO:0006886,GO:0019898,GO:0045053,GO:0045324	endosome|Golgi apparatus|cytosol|protein targeting to vacuole|intracellular protein transport|extrinsic component of membrane|protein retention in Golgi apparatus|late endosome to vacuole transport
LOC103402080	0	0	0	0	0	0	NAC043	NAC domain-containing protein 41-like	GO:0003677,GO:0003700,GO:0005634,GO:0009834,GO:0010047,GO:0045893	DNA binding|DNA-binding transcription factor activity|nucleus|plant-type secondary cell wall biogenesis|fruit dehiscence|positive regulation of transcription, DNA-templated
LOC103402090	0	0	0	0.0130745	0	0.0132428	CESA4	cellulose synthase A catalytic subunit 4 [UDP-forming]	GO:0005794,GO:0005802,GO:0005886,GO:0009833,GO:0009834,GO:0016021,GO:0016759,GO:0016760,GO:0030244,GO:0042742,GO:0046872,GO:0050832,GO:0071555	Golgi apparatus|trans-Golgi network|plasma membrane|plant-type primary cell wall biogenesis|plant-type secondary cell wall biogenesis|integral component of membrane|cellulose synthase activity|cellulose synthase (UDP-forming) activity|cellulose biosynthetic process|defense response to bacterium|metal ion binding|defense response to fungus|cell wall organization
LOC103402092	7.71743	13.247	9.77201	22.3337	18.2941	23.0324		uncharacterized LOC103402092
LOC103402093	0.210024	0.352891	0.235758	0.243715	0.147671	0.138064	AAP6	amino acid permease 6	GO:0003333,GO:0005886,GO:0015171,GO:0015172,GO:0015175,GO:0015293,GO:0015810,GO:0015827,GO:0016021	amino acid transmembrane transport|plasma membrane|amino acid transmembrane transporter activity|acidic amino acid transmembrane transporter activity|neutral amino acid transmembrane transporter activity|symporter activity|aspartate transmembrane transport|tryptophan transport|integral component of membrane
LOC103402095	3.55154	3.278	2.46939	3.07126	2.36927	3.57549	FLACCA	uncharacterized LOC103402095	GO:0006777,GO:0008265,GO:0016829,GO:0030151,GO:0030170,GO:0102867	Mo-molybdopterin cofactor biosynthetic process|Mo-molybdopterin cofactor sulfurase activity|lyase activity|molybdenum ion binding|pyridoxal phosphate binding|molybdenum cofactor sulfurtransferase activity
LOC103402096	11.8915	10.8512	9.37046	8.58162	7.01621	10.2073		protein FAM135B-like
LOC103402103	0.0316154	0.111567	0.0592451	0.0655029	0.059226	0.0110447	At4g27190	probable disease resistance protein At4g27220
LOC103402104	22.8781	26.8511	24.1884	27.7798	17.916	16.9182	XK2	xylulose kinase 2	GO:0004856,GO:0005524,GO:0005737,GO:0005829,GO:0005997,GO:0016117,GO:0016310	xylulokinase activity|ATP binding|cytoplasm|cytosol|xylulose metabolic process|carotenoid biosynthetic process|phosphorylation	path:mdm00040	Pentose and glucuronate interconversions
LOC103402105	0.115338	0.205775	0.217357	0.160285	0.10919	0.285575		cell division cycle-associated protein 7-like
LOC103402106	0	0.0584905	0.0682514	0.0624247	0.0575009	0	RER6	uncharacterized LOC103402106	GO:0007275,GO:0009507,GO:0016021,GO:0031969	multicellular organism development|chloroplast|integral component of membrane|chloroplast membrane
LOC103402107	27.149	24.7888	24.4873	15.8412	16.2417	13.0247		uncharacterized LOC103402107
LOC103402108	20.8897	20.3542	21.067	24.8974	23.6333	25.1592	SMU1	suppressor of mec-8 and unc-52 protein homolog 1	GO:0005634,GO:0005681,GO:0006397,GO:0008380,GO:0080008	nucleus|spliceosomal complex|mRNA processing|RNA splicing|Cul4-RING E3 ubiquitin ligase complex
LOC103402109	0.0124015	0	0.0276759	0	0	0	N	TMV resistance protein N-like	GO:0005524,GO:0005737,GO:0007165,GO:0009626,GO:0043531	ATP binding|cytoplasm|signal transduction|plant-type hypersensitive response|ADP binding
LOC103402111	4.81403	5.71534	5.78566	5.4092	3.92757	4.73702	SPAC1687.19c	queuine tRNA-ribosyltransferase accessory subunit 2-like	GO:0005634,GO:0005829,GO:0008479,GO:0046872,GO:0101030	nucleus|cytosol|queuine tRNA-ribosyltransferase activity|metal ion binding|tRNA-guanine transglycosylation
LOC103402112	0.0330365	0	0.0368554	0	0	0	At2g23540	GDSL esterase/lipase At2g23540	GO:0005576,GO:0016042,GO:0016788	extracellular region|lipid catabolic process|hydrolase activity, acting on ester bonds
LOC103402113	0.409379	0.718794	0.543127	0.0763253	0.210309	0.275342	gedE	uncharacterized LOC103402113	GO:0016740	transferase activity	path:mdm04120	Ubiquitin mediated proteolysis
LOC103402114	5.39512	6.92413	6.40291	3.91229	4.03897	3.52537	At1g22800	putative methyltransferase At1g22800, mitochondrial	GO:0005739,GO:0008168	mitochondrion|methyltransferase activity
LOC103402115	0	0	0	0	0	0	At1g71680	lysine histidine transporter-like 5	GO:0003333,GO:0005886,GO:0015171,GO:0016021	amino acid transmembrane transport|plasma membrane|amino acid transmembrane transporter activity|integral component of membrane
LOC103402116	0	0	0	0	0	0		myosin-11-like
LOC103402118	0	0	0	0	0	0	ERF019	ethylene-responsive transcription factor ERF019	GO:0003677,GO:0003700,GO:0005634,GO:0005737,GO:0009873,GO:0042631	DNA binding|DNA-binding transcription factor activity|nucleus|cytoplasm|ethylene-activated signaling pathway|cellular response to water deprivation
LOC103402119	4.15983	3.25486	1.66083	3.94034	3.64326	1.77474	BAT1	amino-acid permease BAT1 homolog	GO:0005313,GO:0005739,GO:0015180,GO:0015181,GO:0015185,GO:0015189,GO:0015812,GO:0016021,GO:0031966	L-glutamate transmembrane transporter activity|mitochondrion|L-alanine transmembrane transporter activity|arginine transmembrane transporter activity|gamma-aminobutyric acid transmembrane transporter activity|L-lysine transmembrane transporter activity|gamma-aminobutyric acid transport|integral component of membrane|mitochondrial membrane
LOC103402120	1.73705	1.00274	0.979003	1.34279	1.12957	1.86055		integrator complex subunit 3
LOC103402121	14.8312	15.9602	17.8016	9.99853	11.1936	8.88		protein ABHD11-like
LOC103402122	1.54236	1.51952	1.63559	0.98279	0.929392	1.27546	CPK8	calcium-dependent protein kinase 8-like	GO:0004674,GO:0005509,GO:0005524,GO:0005886	protein serine/threonine kinase activity|calcium ion binding|ATP binding|plasma membrane	path:mdm04626	Plant-pathogen interaction
LOC103402123	3.40863	4.19634	3.68656	2.73328	2.61621	3.43413	NUP58	nuclear pore complex protein NUP58	GO:0005635,GO:0005643,GO:0008139,GO:0015031,GO:0017056,GO:0051028	nuclear envelope|nuclear pore|nuclear localization sequence binding|protein transport|structural constituent of nuclear pore|mRNA transport	path:mdm03013	RNA transport
LOC103402124	0	0.03495	0	0	0	0	ERF021	ethylene-responsive transcription factor ERF021	GO:0003677,GO:0003700,GO:0005634,GO:0009873	DNA binding|DNA-binding transcription factor activity|nucleus|ethylene-activated signaling pathway
LOC103402125	5.9956	5.25369	5.92626	5.25129	5.12149	4.9927		uncharacterized LOC103402125
LOC103402131	6.03638	5.1232	7.87984	7.19524	5.1573	5.16767	GBF4	G-box-binding factor 4-like	GO:0003677,GO:0003700,GO:0005634,GO:0043565	DNA binding|DNA-binding transcription factor activity|nucleus|sequence-specific DNA binding	path:mdm04075	Plant hormone signal transduction
LOC103402132	113.487	105.204	106.325	55.8904	50.655	51.7007	AAE1	probable acyl-activating enzyme 1, peroxisomal	GO:0005777,GO:0006631,GO:0016874	peroxisome|fatty acid metabolic process|ligase activity
LOC103402133	2.55352	3.16971	2.49756	4.3452	4.08532	4.8204	At1g62020	coatomer subunit alpha-1-like	GO:0000139,GO:0005198,GO:0005829,GO:0005886,GO:0006886,GO:0006888,GO:0006890,GO:0006891,GO:0016020,GO:0030126	Golgi membrane|structural molecule activity|cytosol|plasma membrane|intracellular protein transport|ER to Golgi vesicle-mediated transport|retrograde vesicle-mediated transport, Golgi to ER|intra-Golgi vesicle-mediated transport|membrane|COPI vesicle coat
LOC103402134	15.325	12.9768	12.9819	15.6662	12.6865	16.5491	UGT80B1	sterol 3-beta-glucosyltransferase UGT80B1-like	GO:0005773,GO:0005774,GO:0005975,GO:0008194,GO:0009813,GO:0009845,GO:0010214,GO:0016125,GO:0016126,GO:0016906,GO:0030259,GO:0043231,GO:0102202,GO:0102203,GO:0102205	vacuole|vacuolar membrane|carbohydrate metabolic process|UDP-glycosyltransferase activity|flavonoid biosynthetic process|seed germination|seed coat development|sterol metabolic process|sterol biosynthetic process|sterol 3-beta-glucosyltransferase activity|lipid glycosylation|intracellular membrane-bounded organelle|soladodine glucosyltransferase activity|brassicasterol glucosyltransferase activit…
LOC103402136	0.0520109	0	0	0	0	0		uclacyanin-3
LOC103402137	0	0	0.0243031	0	0	0	HSP17.6A	probable inactive protein kinase DDB_G0270444	GO:0000302,GO:0005737,GO:0006457,GO:0006970,GO:0009408,GO:0009651,GO:0042542,GO:0043621,GO:0051082,GO:0051259	response to reactive oxygen species|cytoplasm|protein folding|response to osmotic stress|response to heat|response to salt stress|response to hydrogen peroxide|protein self-association|unfolded protein binding|protein complex oligomerization
LOC103402138	1.5818	2.15803	2.10352	1.09345	0.988577	1.21399		uncharacterized LOC103402138
[truncated: 34,514 more rows]
