# Supplementary material for: Transcriptome Analysis of White- and Red-Fleshed Apple Fruits Uncovered Novel Genes Related to the Regulation of Anthocyanin Biosynthesis
Source: Int J Mol Sci. 2024 Feb 1;25(3):1778. doi: 10.3390/ijms25031778 (PMC10855924; doi:10.3390/ijms25031778)
Supplement: Supplementary file 1 [file ijms-25-01778-s001.zip › Supplementary Table S5.xlt]

## Sheet: Up_vs_Down.GO.level2.stat
#GO_classify1	GO_classify2	diff-Up	diff-Down	Gene(diff-Up)	Gene(diff-Down)
#Total_gene		1635	1865
biological process	biological adhesion	0.0611620795107034	0.0536193029490617	LOC103423926	LOC103417234
biological process	biological regulation	29.4189602446483	27.6139410187668	AUX/IAA7.1; GATA7; HD1; IAA9; LOC103400015; LOC103400276; LOC103400512; LOC103400651; LOC103400659; LOC103400771; LOC103400967; LOC103401038; LOC103401120; LOC103401207; LOC103401294; LOC103401541; LOC103401608; LOC103401682; LOC103401725; LOC103401851; LOC103402155; LOC103402159; LOC103402172; LOC103402202; LOC103402223; LOC103402437; LOC103402544; LOC103402615; LOC103402722; LOC103402838; LOC10…	ARF2; BZIP12; BZIP18; DOF7; GATA5; LOC103400021; LOC103400029; LOC103400057; LOC103400372; LOC103400377; LOC103400515; LOC103400708; LOC103400741; LOC103400826; LOC103400911; LOC103401167; LOC103401257; LOC103401375; LOC103401390; LOC103401564; LOC103402019; LOC103402341; LOC103402598; LOC103402628; LOC103402675; LOC103402704; LOC103402759; LOC103402760; LOC103402803; LOC103402819; LOC103402920; …
biological process	cell killing	0.0611620795107034	0	LOC103403450	--
biological process	cellular component organization or biogenesis	13.9449541284404	16.7292225201072	LOC103400446; LOC103400651; LOC103401242; LOC103401285; LOC103401294; LOC103401497; LOC103401541; LOC103401725; LOC103401937; LOC103403007; LOC103403011; LOC103404160; LOC103404347; LOC103404780; LOC103404947; LOC103405011; LOC103405188; LOC103405387; LOC103405459; LOC103405785; LOC103407259; LOC103407277; LOC103407702; LOC103407783; LOC103407929; LOC103408028; LOC103408057; LOC103408110; LOC1034…	GATA5; LOC103400029; LOC103400057; LOC103400708; LOC103400744; LOC103400900; LOC103401167; LOC103401257; LOC103401564; LOC103401612; LOC103402019; LOC103402341; LOC103402596; LOC103402598; LOC103402602; LOC103402628; LOC103402675; LOC103402759; LOC103402760; LOC103402973; LOC103403404; LOC103403793; LOC103404218; LOC103404434; LOC103404638; LOC103404652; LOC103405225; LOC103405234; LOC103405345; …
biological process	cellular process	57.7981651376147	62.8954423592493	AUX/IAA7.1; CYP707A; GATA7; HD1; IAA9; LOC103400015; LOC103400130; LOC103400190; LOC103400276; LOC103400427; LOC103400446; LOC103400512; LOC103400651; LOC103400659; LOC103400771; LOC103400937; LOC103400967; LOC103401038; LOC103401089; LOC103401120; LOC103401207; LOC103401220; LOC103401242; LOC103401251; LOC103401285; LOC103401294; LOC103401308; LOC103401497; LOC103401541; LOC103401648; LOC1034016…	ARF2; BZIP12; BZIP18; DOF7; GATA5; LAR1; LIS; LOC103400021; LOC103400029; LOC103400057; LOC103400222; LOC103400255; LOC103400282; LOC103400372; LOC103400377; LOC103400502; LOC103400515; LOC103400552; LOC103400609; LOC103400708; LOC103400740; LOC103400741; LOC103400744; LOC103400753; LOC103400792; LOC103400826; LOC103400855; LOC103400900; LOC103400901; LOC103401008; LOC103401023; LOC103401167; LOC…
biological process	developmental process	16.2079510703364	16.5683646112601	CYP707A; HD14; LOC103400446; LOC103400659; LOC103401120; LOC103401207; LOC103401242; LOC103401285; LOC103401541; LOC103401698; LOC103401937; LOC103402159; LOC103402202; LOC103402615; LOC103403011; LOC103403054; LOC103403150; LOC103403751; LOC103403764; LOC103403776; LOC103403965; LOC103404347; LOC103404881; LOC103405011; LOC103405189; LOC103405311; LOC103405387; LOC103405459; LOC103405643; LOC103…	ARF2; BZIP18; GATA5; HD19; LOC103400029; LOC103400609; LOC103400744; LOC103400855; LOC103400911; LOC103401390; LOC103402341; LOC103402408; LOC103402598; LOC103402602; LOC103402628; LOC103402675; LOC103402759; LOC103402760; LOC103402920; LOC103403008; LOC103403099; LOC103403196; LOC103403299; LOC103403793; LOC103403905; LOC103404093; LOC103404107; LOC103404181; LOC103404434; LOC103404939; LOC10340…
biological process	establishment of localization	11.743119266055	11.5281501340483	LOC103400789; LOC103401243; LOC103401497; LOC103401648; LOC103401649; LOC103401698; LOC103402020; LOC103402133; LOC103402159; LOC103402202; LOC103402437; LOC103402715; LOC103403054; LOC103403071; LOC103403689; LOC103404225; LOC103404445; LOC103405169; LOC103405459; LOC103406428; LOC103406454; LOC103406473; LOC103406741; LOC103407484; LOC103407702; LOC103407783; LOC103407929; LOC103409595; LOC1034…	LOC103400755; LOC103400826; LOC103401609; LOC103401951; LOC103402171; LOC103402598; LOC103402630; LOC103402803; LOC103402920; LOC103403779; LOC103404175; LOC103404434; LOC103404664; LOC103404777; LOC103405038; LOC103405234; LOC103405517; LOC103405649; LOC103405794; LOC103407117; LOC103408100; LOC103408627; LOC103408740; LOC103408813; LOC103409051; LOC103409428; LOC103409790; LOC103410269; LOC1034…
biological process	growth	4.77064220183486	2.78820375335121	LOC103400659; LOC103401120; LOC103401541; LOC103402615; LOC103403007; LOC103404347; LOC103405011; LOC103405115; LOC103405189; LOC103406235; LOC103406790; LOC103408381; LOC103409147; LOC103409419; LOC103409996; LOC103410709; LOC103414585; LOC103415754; LOC103415886; LOC103416028; LOC103416597; LOC103417016; LOC103417526; LOC103417569; LOC103420180; LOC103420867; LOC103420971; LOC103421310; LOC1034…	LOC103400029; LOC103402341; LOC103402598; LOC103403196; LOC103405225; LOC103409844; LOC103414741; LOC103415415; LOC103416019; LOC103416548; LOC103418473; LOC103420485; LOC103423906; LOC103424268; LOC103425955; LOC103428835; LOC103437827; LOC103439454; LOC103439980; LOC103439987; LOC103441913; LOC103442270; LOC103443794; LOC103443836; LOC103443879; LOC103444033; LOC103444114; LOC103444473; LOC1034…
biological process	immune system process	5.13761467889908	4.55764075067024	LOC103402155; LOC103402172; LOC103402223; LOC103404187; LOC103406393; LOC103406876; LOC103407569; LOC103407627; LOC103407677; LOC103409920; LOC103411200; LOC103411333; LOC103411899; LOC103411952; LOC103412262; LOC103412412; LOC103413034; LOC103414497; LOC103415091; LOC103415314; LOC103415813; LOC103416856; LOC103417012; LOC103417027; LOC103417037; LOC103417055; LOC103417122; LOC103417370; LOC1034…	LOC103401375; LOC103402655; LOC103402819; LOC103404266; LOC103405913; LOC103406408; LOC103406767; LOC103406792; LOC103407531; LOC103409239; LOC103409844; LOC103410432; LOC103411956; LOC103413636; LOC103415199; LOC103416390; LOC103416861; LOC103417025; LOC103417235; LOC103417828; LOC103417989; LOC103418029; LOC103418236; LOC103419738; LOC103420624; LOC103420905; LOC103420911; LOC103420956; LOC1034…
biological process	localization	12.4770642201835	12.171581769437	LOC103400789; LOC103401149; LOC103401243; LOC103401497; LOC103401648; LOC103401649; LOC103401698; LOC103402020; LOC103402133; LOC103402159; LOC103402202; LOC103402437; LOC103402715; LOC103403054; LOC103403071; LOC103403689; LOC103404225; LOC103404445; LOC103405169; LOC103405428; LOC103405459; LOC103406428; LOC103406454; LOC103406473; LOC103406741; LOC103407484; LOC103407702; LOC103407783; LOC1034…	LOC103400755; LOC103400826; LOC103401609; LOC103401951; LOC103402171; LOC103402598; LOC103402630; LOC103402803; LOC103402819; LOC103402920; LOC103403779; LOC103404175; LOC103404434; LOC103404664; LOC103404777; LOC103405038; LOC103405234; LOC103405517; LOC103405649; LOC103405794; LOC103407117; LOC103408100; LOC103408627; LOC103408740; LOC103408813; LOC103409051; LOC103409428; LOC103409790; LOC1034…
biological process	locomotion	0.0611620795107034	0.32171581769437	LOC103444234	LOC103416548; LOC103425348; LOC103433516; LOC103451976; LOC114821230; LOC114824866
biological process	metabolic process	46.7889908256881	52.4932975871314	AUX/IAA7.1; CYP707A; GATA7; LOC103400025; LOC103400130; LOC103400190; LOC103400276; LOC103400427; LOC103400512; LOC103400651; LOC103400659; LOC103400937; LOC103400967; LOC103401038; LOC103401089; LOC103401207; LOC103401220; LOC103401242; LOC103401251; LOC103401285; LOC103401308; LOC103401541; LOC103401608; LOC103401648; LOC103401654; LOC103401725; LOC103401753; LOC103401762; LOC103401786; LOC1034…	BGAL101; BZIP12; DOF7; FLS; GATA5; LAR1; LIS; LOC103400029; LOC103400222; LOC103400255; LOC103400282; LOC103400372; LOC103400377; LOC103400502; LOC103400515; LOC103400517; LOC103400609; LOC103400703; LOC103400708; LOC103400740; LOC103400741; LOC103400744; LOC103400753; LOC103400792; LOC103400826; LOC103400855; LOC103400901; LOC103401167; LOC103401257; LOC103401259; LOC103401375; LOC103401379; LOC…
biological process	multi-organism process	8.31804281345566	8.41823056300268	LOC103400678; LOC103401068; LOC103402159; LOC103402172; LOC103402458; LOC103403054; LOC103403450; LOC103403544; LOC103403720; LOC103403871; LOC103404347; LOC103404780; LOC103405103; LOC103405311; LOC103405459; LOC103406365; LOC103406393; LOC103406519; LOC103406610; LOC103406827; LOC103406883; LOC103407627; LOC103408381; LOC103409241; LOC103409419; LOC103411200; LOC103412608; LOC103413034; LOC1034…	LOC103401167; LOC103401375; LOC103401564; LOC103402561; LOC103402602; LOC103402628; LOC103402819; LOC103403664; LOC103403905; LOC103405828; LOC103405870; LOC103406245; LOC103407049; LOC103408145; LOC103409080; LOC103409099; LOC103411258; LOC103411956; LOC103412406; LOC103413684; LOC103414741; LOC103415736; LOC103416019; LOC103416217; LOC103416548; LOC103416552; LOC103417025; LOC103417234; LOC1034…
biological process	multicellular organismal process	14.7400611620795	14.745308310992	CYP707A; HD14; LOC103400659; LOC103401120; LOC103401207; LOC103401242; LOC103401285; LOC103401541; LOC103401698; LOC103401937; LOC103402202; LOC103402615; LOC103403011; LOC103403054; LOC103403150; LOC103403751; LOC103403764; LOC103403776; LOC103403965; LOC103404347; LOC103404881; LOC103405011; LOC103405189; LOC103405311; LOC103405387; LOC103405643; LOC103406235; LOC103406265; LOC103406365; LOC103…	ARF2; BZIP18; GATA5; HD19; LOC103400609; LOC103400744; LOC103400855; LOC103401390; LOC103402408; LOC103402598; LOC103402602; LOC103402675; LOC103402760; LOC103402920; LOC103403008; LOC103403099; LOC103403196; LOC103403299; LOC103403793; LOC103403905; LOC103404093; LOC103404107; LOC103404181; LOC103404434; LOC103404939; LOC103405187; LOC103405234; LOC103405483; LOC103405722; LOC103405828; LOC10340…
biological process	negative regulation of biological process	4.40366972477064	5.79088471849866	LOC103401294; LOC103402159; LOC103403551; LOC103403965; LOC103405103; LOC103405497; LOC103405643; LOC103406741; LOC103406827; LOC103407349; LOC103407569; LOC103407598; LOC103409241; LOC103410709; LOC103412999; LOC103414497; LOC103414585; LOC103415989; LOC103416028; LOC103416597; LOC103416856; LOC103419124; LOC103421310; LOC103422296; LOC103422400; LOC103422586; LOC103424832; LOC103425705; LOC1034…	GATA5; LOC103400708; LOC103400826; LOC103401167; LOC103401390; LOC103401564; LOC103402019; LOC103402628; LOC103402760; LOC103403299; LOC103403905; LOC103405483; LOC103405620; LOC103405870; LOC103406245; LOC103406926; LOC103407637; LOC103408530; LOC103409844; LOC103412678; LOC103412715; LOC103412934; LOC103413424; LOC103416787; LOC103416861; LOC103417323; LOC103418693; LOC103419116; LOC103419513; …
biological process	positive regulation of biological process	6.23853211009174	6.48793565683646	GATA7; LOC103400967; LOC103401038; LOC103401207; LOC103401294; LOC103401725; LOC103403720; LOC103404780; LOC103405011; LOC103405189; LOC103406741; LOC103406827; LOC103407084; LOC103407277; LOC103407627; LOC103409182; LOC103410574; LOC103410576; LOC103411867; LOC103413593; LOC103415780; LOC103415886; LOC103416871; LOC103417055; LOC103417084; LOC103417370; LOC103417526; LOC103418249; LOC103418295; …	BZIP18; GATA5; LOC103400029; LOC103400057; LOC103401167; LOC103401564; LOC103402341; LOC103402803; LOC103402819; LOC103403008; LOC103403456; LOC103404093; LOC103405327; LOC103405620; LOC103406245; LOC103407596; LOC103407991; LOC103408145; LOC103409766; LOC103410658; LOC103412715; LOC103412934; LOC103413206; LOC103413641; LOC103414741; LOC103415312; LOC103415766; LOC103416566; LOC103416613; LOC103…
biological process	regulation of biological process	26.4831804281346	25.3619302949062	AUX/IAA7.1; GATA7; HD1; IAA9; LOC103400015; LOC103400276; LOC103400651; LOC103400659; LOC103400771; LOC103400967; LOC103401038; LOC103401120; LOC103401207; LOC103401294; LOC103401541; LOC103401608; LOC103401682; LOC103401725; LOC103401851; LOC103402155; LOC103402159; LOC103402172; LOC103402202; LOC103402223; LOC103402437; LOC103402544; LOC103402615; LOC103402722; LOC103402838; LOC103403551; LOC10…	ARF2; BZIP12; BZIP18; DOF7; GATA5; LOC103400021; LOC103400029; LOC103400057; LOC103400372; LOC103400377; LOC103400515; LOC103400708; LOC103400741; LOC103400826; LOC103400911; LOC103401167; LOC103401257; LOC103401375; LOC103401390; LOC103401564; LOC103402019; LOC103402341; LOC103402598; LOC103402628; LOC103402675; LOC103402704; LOC103402759; LOC103402760; LOC103402803; LOC103402819; LOC103402920; …
biological process	reproduction	7.70642201834862	9.16890080428954	CYP707A; HD14; LOC103401207; LOC103401242; LOC103401285; LOC103401937; LOC103403011; LOC103403054; LOC103403764; LOC103404347; LOC103404881; LOC103405189; LOC103405311; LOC103405387; LOC103405459; LOC103406741; LOC103407598; LOC103408057; LOC103409182; LOC103409419; LOC103411183; LOC103412703; LOC103412921; LOC103413017; LOC103413400; LOC103414170; LOC103414187; LOC103414303; LOC103415256; LOC103…	ARF2; BZIP18; GATA5; HD19; LOC103400744; LOC103401390; LOC103402408; LOC103402602; LOC103402760; LOC103403099; LOC103403299; LOC103403793; LOC103404107; LOC103404181; LOC103404434; LOC103404939; LOC103405187; LOC103405234; LOC103405517; LOC103405722; LOC103405828; LOC103405834; LOC103405902; LOC103406258; LOC103406905; LOC103407080; LOC103407637; LOC103411332; LOC103412083; LOC103412644; LOC10341…
biological process	reproductive process	7.58409785932722	9.16890080428954	CYP707A; HD14; LOC103401207; LOC103401285; LOC103401937; LOC103403011; LOC103403054; LOC103403764; LOC103404347; LOC103404881; LOC103405189; LOC103405311; LOC103405387; LOC103405459; LOC103406741; LOC103407598; LOC103408057; LOC103409182; LOC103409419; LOC103411183; LOC103412703; LOC103412921; LOC103413017; LOC103413400; LOC103414170; LOC103414187; LOC103414303; LOC103415256; LOC103415722; LOC103…	ARF2; BZIP18; GATA5; HD19; LOC103400744; LOC103401390; LOC103402408; LOC103402602; LOC103402760; LOC103403099; LOC103403299; LOC103403793; LOC103404107; LOC103404181; LOC103404434; LOC103404939; LOC103405187; LOC103405234; LOC103405517; LOC103405722; LOC103405828; LOC103405834; LOC103405902; LOC103406258; LOC103406905; LOC103407080; LOC103407637; LOC103411332; LOC103412083; LOC103412644; LOC10341…
biological process	response to stimulus	36.6360856269113	32.9222520107239	AUX/IAA7.1; CYP707A; HD1; HD14; IAA9; LOC103400015; LOC103400130; LOC103400276; LOC103400659; LOC103400678; LOC103400771; LOC103400926; LOC103401038; LOC103401068; LOC103401120; LOC103401207; LOC103401541; LOC103401608; LOC103401648; LOC103401654; LOC103401682; LOC103402155; LOC103402159; LOC103402172; LOC103402202; LOC103402223; LOC103402375; LOC103402437; LOC103402458; LOC103402574; LOC10340257…	ARF2; BZIP12; BZIP18; GATA5; HD19; LOC103400021; LOC103400222; LOC103400372; LOC103400515; LOC103400552; LOC103400708; LOC103400741; LOC103400744; LOC103400792; LOC103400826; LOC103400918; LOC103401023; LOC103401375; LOC103401390; LOC103401954; LOC103402025; LOC103402171; LOC103402561; LOC103402596; LOC103402598; LOC103402602; LOC103402628; LOC103402630; LOC103402655; LOC103402675; LOC103402693; …
biological process	rhythmic process	0.978593272171254	0.96514745308311	LOC103410574; LOC103412999; LOC103419795; LOC103420490; LOC103422468; LOC103424888; LOC103429871; LOC103430935; LOC103434702; LOC103436695; LOC103437302; LOC103443414; LOC103446932; LOC103452519; LOC103454120; LOC114824783	GATA5; LOC103401390; LOC103403589; LOC103408778; LOC103418467; LOC103419738; LOC103422593; LOC103427062; LOC103428062; LOC103431299; LOC103432192; LOC103433175; LOC103435071; LOC103438439; LOC103450907; LOC103451676; LOC114823694; LOC114826603
biological process	signaling	13.2110091743119	9.49061662198391	AUX/IAA7.1; HD1; IAA9; LOC103400015; LOC103400276; LOC103400659; LOC103400771; LOC103401038; LOC103401120; LOC103401541; LOC103401682; LOC103402155; LOC103402159; LOC103402172; LOC103402223; LOC103402437; LOC103402615; LOC103403720; LOC103403751; LOC103403972; LOC103404072; LOC103404104; LOC103404187; LOC103404780; LOC103405015; LOC103405497; LOC103406235; LOC103406393; LOC103406741; LOC103406827…	ARF2; BZIP12; GATA5; LOC103400515; LOC103400826; LOC103402598; LOC103402675; LOC103402803; LOC103402819; LOC103402920; LOC103403196; LOC103403536; LOC103403589; LOC103403664; LOC103403966; LOC103404266; LOC103404434; LOC103405234; LOC103405870; LOC103405902; LOC103405913; LOC103406408; LOC103406767; LOC103406792; LOC103406926; LOC103407240; LOC103407531; LOC103407637; LOC103407849; LOC103409239; …
biological process	single-organism process	49.1131498470948	51.0455764075067	AUX/IAA7.1; CYP707A; HD1; HD14; IAA9; LOC103400015; LOC103400130; LOC103400276; LOC103400427; LOC103400446; LOC103400659; LOC103400771; LOC103400789; LOC103401038; LOC103401089; LOC103401120; LOC103401207; LOC103401242; LOC103401243; LOC103401285; LOC103401294; LOC103401497; LOC103401541; LOC103401648; LOC103401649; LOC103401654; LOC103401682; LOC103401698; LOC103401725; LOC103401753; LOC10340176…	ARF2; BZIP12; BZIP18; GATA5; HD19; LAR1; LIS; LOC103400021; LOC103400029; LOC103400057; LOC103400502; LOC103400515; LOC103400609; LOC103400703; LOC103400708; LOC103400740; LOC103400744; LOC103400753; LOC103400792; LOC103400826; LOC103400855; LOC103400900; LOC103400901; LOC103401008; LOC103401023; LOC103401167; LOC103401375; LOC103401379; LOC103401390; LOC103401506; LOC103401564; LOC103401840; LOC…
cellular component	cell	76.7584097859327	82.0375335120643	AUX/IAA7.1; GATA7; HD1; HD14; IAA9; LOC103400015; LOC103400130; LOC103400190; LOC103400239; LOC103400276; LOC103400427; LOC103400446; LOC103400651; LOC103400658; LOC103400659; LOC103400678; LOC103400771; LOC103400789; LOC103400844; LOC103400926; LOC103400937; LOC103400967; LOC103401038; LOC103401089; LOC103401120; LOC103401149; LOC103401207; LOC103401220; LOC103401242; LOC103401243; LOC103401251;…	ABI3L1; ARF2; BZIP12; BZIP18; DOF7; FLS; GATA5; HD16; HD19; LIS; LOC103400017; LOC103400029; LOC103400054; LOC103400057; LOC103400153; LOC103400222; LOC103400255; LOC103400282; LOC103400372; LOC103400428; LOC103400467; LOC103400502; LOC103400515; LOC103400517; LOC103400552; LOC103400609; LOC103400708; LOC103400730; LOC103400740; LOC103400741; LOC103400744; LOC103400753; LOC103400755; LOC103400826…
cellular component	cell junction	4.28134556574924	3.16353887399464	LOC103401038; LOC103402202; LOC103406163; LOC103409996; LOC103410246; LOC103413741; LOC103417370; LOC103418149; LOC103418631; LOC103419864; LOC103421679; LOC103422468; LOC103424405; LOC103425102; LOC103425823; LOC103426201; LOC103427215; LOC103427839; LOC103428212; LOC103428521; LOC103428693; LOC103430030; LOC103430075; LOC103430360; LOC103431148; LOC103431198; LOC103431392; LOC103436247; LOC1034…	LOC103402693; LOC103402825; LOC103403793; LOC103404253; LOC103404652; LOC103405911; LOC103408740; LOC103408778; LOC103411956; LOC103416673; LOC103417767; LOC103418570; LOC103419852; LOC103420516; LOC103422455; LOC103422599; LOC103425575; LOC103425955; LOC103426753; LOC103426927; LOC103427184; LOC103430817; LOC103431028; LOC103431672; LOC103433046; LOC103433178; LOC103433972; LOC103435003; LOC1034…
cellular component	cell part	76.5749235474006	81.9839142091153	AUX/IAA7.1; GATA7; HD1; HD14; IAA9; LOC103400015; LOC103400130; LOC103400190; LOC103400239; LOC103400276; LOC103400427; LOC103400446; LOC103400651; LOC103400658; LOC103400659; LOC103400678; LOC103400771; LOC103400789; LOC103400844; LOC103400926; LOC103400937; LOC103400967; LOC103401038; LOC103401089; LOC103401120; LOC103401149; LOC103401207; LOC103401220; LOC103401242; LOC103401243; LOC103401251;…	ABI3L1; ARF2; BZIP12; BZIP18; DOF7; FLS; GATA5; HD16; HD19; LIS; LOC103400017; LOC103400029; LOC103400054; LOC103400057; LOC103400153; LOC103400222; LOC103400255; LOC103400282; LOC103400372; LOC103400428; LOC103400467; LOC103400502; LOC103400515; LOC103400517; LOC103400552; LOC103400609; LOC103400708; LOC103400730; LOC103400740; LOC103400741; LOC103400744; LOC103400753; LOC103400755; LOC103400826…
cellular component	extracellular matrix	0	0	--	--
cellular component	extracellular matrix part	0	0	--	--
cellular component	extracellular region	8.68501529051988	4.93297587131367	LOC103400659; LOC103400937; LOC103401285; LOC103401308; LOC103403007; LOC103403011; LOC103403450; LOC103403831; LOC103403867; LOC103404424; LOC103404425; LOC103404947; LOC103405115; LOC103405827; LOC103407051; LOC103407374; LOC103407786; LOC103407787; LOC103408057; LOC103408110; LOC103408558; LOC103409241; LOC103409272; LOC103409407; LOC103410189; LOC103410311; LOC103411200; LOC103411620; LOC1034…	BGAL101; LOC103400703; LOC103400911; LOC103401612; LOC103401929; LOC103402594; LOC103404253; LOC103404652; LOC103405696; LOC103405759; LOC103405911; LOC103405974; LOC103407180; LOC103408080; LOC103408102; LOC103408674; LOC103408753; LOC103408778; LOC103412482; LOC103415331; LOC103416311; LOC103416593; LOC103416673; LOC103418853; LOC103419398; LOC103419852; LOC103420157; LOC103420967; LOC103421585…
cellular component	extracellular region part	1.46788990825688	0.697050938337802	LOC103400937; LOC103410311; LOC103412527; LOC103414835; LOC103417539; LOC103421060; LOC103422296; LOC103426493; LOC103429545; LOC103438473; LOC103439495; LOC103440288; LOC103440369; LOC103440470; LOC103441630; LOC103443344; LOC103443354; LOC103448789; LOC103448808; LOC103451125; LOC103451924; LOC103453996; LOC114819251; LOC114821569	LOC103405696; LOC103408080; LOC103408102; LOC103420967; LOC103423394; LOC103425895; LOC103430997; LOC103440473; LOC103444863; LOC108172967; LOC114823685; LOC114824033; LOC114826934
cellular component	macromolecular complex	8.01223241590214	15.1206434316354	LOC103400130; LOC103400190; LOC103400446; LOC103400844; LOC103401220; LOC103401251; LOC103401497; LOC103401698; LOC103401725; LOC103402133; LOC103403033; LOC103403226; LOC103403551; LOC103403689; LOC103405103; LOC103405186; LOC103405253; LOC103405459; LOC103406827; LOC103407702; LOC103407783; LOC103408381; LOC103409717; LOC103411867; LOC103412403; LOC103412553; LOC103412658; LOC103413017; LOC1034…	LOC103400057; LOC103400255; LOC103400372; LOC103400708; LOC103400826; LOC103401167; LOC103401257; LOC103401564; LOC103402341; LOC103402356; LOC103402637; LOC103402760; LOC103402952; LOC103403170; LOC103403404; LOC103404133; LOC103404218; LOC103405098; LOC103405142; LOC103405309; LOC103405345; LOC103405453; LOC103405517; LOC103405828; LOC103405853; LOC103405974; LOC103406008; LOC103406342; LOC1034…
cellular component	membrane	37.4311926605505	35.7104557640751	CYP707A; LOC103400130; LOC103400276; LOC103400789; LOC103401038; LOC103401089; LOC103401096; LOC103401120; LOC103401220; LOC103401242; LOC103401243; LOC103401294; LOC103401497; LOC103401541; LOC103401649; LOC103401698; LOC103401753; LOC103401888; LOC103402020; LOC103402133; LOC103402202; LOC103402375; LOC103402437; LOC103402458; LOC103402615; LOC103402654; LOC103402959; LOC103402984; LOC103402992…	LOC103400017; LOC103400029; LOC103400054; LOC103400428; LOC103400467; LOC103400502; LOC103400515; LOC103400517; LOC103400741; LOC103400855; LOC103401023; LOC103401257; LOC103401259; LOC103401375; LOC103401379; LOC103401562; LOC103401609; LOC103401951; LOC103402025; LOC103402171; LOC103402561; LOC103402588; LOC103402598; LOC103402630; LOC103402655; LOC103402693; LOC103402704; LOC103402759; LOC1034…
cellular component	membrane part	27.5229357798165	26.058981233244	CYP707A; LOC103400130; LOC103400789; LOC103401096; LOC103401220; LOC103401242; LOC103401243; LOC103401294; LOC103401497; LOC103401541; LOC103401649; LOC103401698; LOC103401753; LOC103402020; LOC103402133; LOC103402202; LOC103402375; LOC103402458; LOC103402615; LOC103402654; LOC103402959; LOC103402984; LOC103402992; LOC103403007; LOC103403071; LOC103403150; LOC103403786; LOC103403871; LOC103404225…	LOC103400017; LOC103400029; LOC103400054; LOC103400428; LOC103400502; LOC103400517; LOC103400855; LOC103401023; LOC103401257; LOC103401609; LOC103401951; LOC103402025; LOC103402171; LOC103402561; LOC103402588; LOC103402598; LOC103402630; LOC103402655; LOC103402759; LOC103402807; LOC103402825; LOC103402920; LOC103402973; LOC103403099; LOC103403106; LOC103403170; LOC103403299; LOC103403306; LOC1034…
cellular component	membrane-enclosed lumen	3.6085626911315	6.4343163538874	LOC103401648; LOC103401698; LOC103403551; LOC103403689; LOC103404467; LOC103405459; LOC103405859; LOC103406827; LOC103406865; LOC103408381; LOC103408917; LOC103409717; LOC103409996; LOC103410132; LOC103411017; LOC103411276; LOC103412168; LOC103412658; LOC103413077; LOC103413741; LOC103414115; LOC103414415; LOC103417933; LOC103418657; LOC103418804; LOC103428212; LOC103428449; LOC103431531; LOC1034…	LOC103400153; LOC103400372; LOC103400744; LOC103402637; LOC103402760; LOC103404218; LOC103405149; LOC103405309; LOC103405517; LOC103405620; LOC103405828; LOC103406008; LOC103406342; LOC103406461; LOC103407080; LOC103407242; LOC103407596; LOC103408488; LOC103408530; LOC103412406; LOC103412575; LOC103413641; LOC103416155; LOC103416566; LOC103416613; LOC103416775; LOC103416915; LOC103417767; LOC1034…
cellular component	mitochondrion-associated adherens complex	0	0	--	--
cellular component	nucleoid	0.18348623853211	0.697050938337802	LOC103420753; LOC103428029; LOC103444030	LOC103406342; LOC103412245; LOC103425493; LOC103445715; LOC103445979; LOC103446141; LOC103449037; LOC103451457; LOC103451857; LOC103452780; LOC114821120; LOC114823931; LOC114826075
cellular component	organelle	53.2721712538226	64.0214477211796	AUX/IAA7.1; GATA7; HD1; HD14; IAA9; LOC103400015; LOC103400130; LOC103400239; LOC103400276; LOC103400427; LOC103400446; LOC103400651; LOC103400658; LOC103400659; LOC103400771; LOC103400789; LOC103400844; LOC103400926; LOC103400937; LOC103400967; LOC103401038; LOC103401089; LOC103401149; LOC103401207; LOC103401220; LOC103401242; LOC103401243; LOC103401251; LOC103401441; LOC103401541; LOC103401608;…	ABI3L1; ARF2; BZIP12; BZIP18; DOF7; GATA5; HD16; HD19; LIS; LOC103400017; LOC103400029; LOC103400054; LOC103400057; LOC103400153; LOC103400222; LOC103400255; LOC103400282; LOC103400372; LOC103400428; LOC103400467; LOC103400502; LOC103400515; LOC103400552; LOC103400609; LOC103400708; LOC103400730; LOC103400744; LOC103400755; LOC103400826; LOC103400852; LOC103400900; LOC103400918; LOC103401008; LOC…
cellular component	organelle part	23.302752293578	33.4048257372654	LOC103400130; LOC103400239; LOC103400276; LOC103400446; LOC103400789; LOC103400844; LOC103400926; LOC103401220; LOC103401242; LOC103401243; LOC103401648; LOC103401698; LOC103401753; LOC103402133; LOC103402375; LOC103402437; LOC103402615; LOC103402963; LOC103402984; LOC103403002; LOC103403071; LOC103403150; LOC103403551; LOC103403689; LOC103404104; LOC103404160; LOC103404467; LOC103404698; LOC1034…	LOC103400029; LOC103400054; LOC103400057; LOC103400153; LOC103400255; LOC103400372; LOC103400428; LOC103400467; LOC103400502; LOC103400515; LOC103400609; LOC103400708; LOC103400744; LOC103400826; LOC103400900; LOC103401167; LOC103401257; LOC103401375; LOC103401562; LOC103401564; LOC103401954; LOC103402171; LOC103402341; LOC103402598; LOC103402637; LOC103402760; LOC103402807; LOC103402920; LOC1034…
cellular component	symplast	4.28134556574924	3.16353887399464	LOC103401038; LOC103402202; LOC103406163; LOC103409996; LOC103410246; LOC103413741; LOC103417370; LOC103418149; LOC103418631; LOC103419864; LOC103421679; LOC103422468; LOC103424405; LOC103425102; LOC103425823; LOC103426201; LOC103427215; LOC103427839; LOC103428212; LOC103428521; LOC103428693; LOC103430030; LOC103430075; LOC103430360; LOC103431148; LOC103431198; LOC103431392; LOC103436247; LOC1034…	LOC103402693; LOC103402825; LOC103403793; LOC103404253; LOC103404652; LOC103405911; LOC103408740; LOC103408778; LOC103411956; LOC103416673; LOC103417767; LOC103418570; LOC103419852; LOC103420516; LOC103422455; LOC103422599; LOC103425575; LOC103425955; LOC103426753; LOC103426927; LOC103427184; LOC103430817; LOC103431028; LOC103431672; LOC103433046; LOC103433178; LOC103433972; LOC103435003; LOC1034…
cellular component	synapse	0	0	--	--
cellular component	synapse part	0	0	--	--
cellular component	virion	0	0	--	--
cellular component	virion part	0	0	--	--
molecular function	D-alanyl carrier activity	0	0	--	--
molecular function	antioxidant activity	1.10091743119266	0.911528150134048	LOC103403867; LOC103410246; LOC103411276; LOC103413735; LOC103413973; LOC103420753; LOC103422275; LOC103422468; LOC103430595; LOC103433139; LOC103438671; LOC103442292; LOC103445262; LOC103446626; LOC103446628; LOC103453173; LOC103454744; LOC108171274	LOC103408778; LOC103412309; LOC103412715; LOC103426862; LOC103427921; LOC103428743; LOC103434128; LOC103436352; LOC103448046; LOC103451457; LOC103451722; LOC103452780; LOC103454745; LOC103455654; LOC103455972; LOC108171167; LOC114823685
molecular function	binding	55.7186544342508	58.8203753351206	CYP707A; GATA7; HD1; HD14; LOC103400015; LOC103400025; LOC103400130; LOC103400427; LOC103400512; LOC103400651; LOC103400659; LOC103400678; LOC103400771; LOC103400844; LOC103400967; LOC103401038; LOC103401149; LOC103401207; LOC103401220; LOC103401251; LOC103401294; LOC103401441; LOC103401471; LOC103401497; LOC103401541; LOC103401608; LOC103401648; LOC103401654; LOC103401682; LOC103401698; LOC10340…	ABI3L1; ARF2; BZIP18; DOF7; FLS; GATA5; HD16; HD19; LIS; LOC103400021; LOC103400057; LOC103400153; LOC103400222; LOC103400282; LOC103400372; LOC103400377; LOC103400467; LOC103400515; LOC103400552; LOC103400609; LOC103400708; LOC103400730; LOC103400740; LOC103400741; LOC103400744; LOC103400753; LOC103400792; LOC103400826; LOC103400855; LOC103400900; LOC103400918; LOC103401167; LOC103401379; LOC103…
molecular function	catalytic activity	50.2752293577982	50.455764075067	CYP707A; LOC103400025; LOC103400130; LOC103400276; LOC103400427; LOC103400446; LOC103400512; LOC103400651; LOC103400658; LOC103400678; LOC103400771; LOC103400937; LOC103401038; LOC103401089; LOC103401242; LOC103401285; LOC103401308; LOC103401471; LOC103401541; LOC103401654; LOC103401753; LOC103401762; LOC103401786; LOC103401823; LOC103401888; LOC103402172; LOC103402202; LOC103402375; LOC103402437…	BGAL101; FLS; LAR1; LIS; LOC103400017; LOC103400222; LOC103400282; LOC103400428; LOC103400502; LOC103400515; LOC103400517; LOC103400552; LOC103400609; LOC103400703; LOC103400708; LOC103400740; LOC103400753; LOC103400792; LOC103400855; LOC103400900; LOC103400901; LOC103401167; LOC103401257; LOC103401350; LOC103401375; LOC103401379; LOC103401407; LOC103401506; LOC103401564; LOC103401612; LOC1034018…
molecular function	channel regulator activity	0	0	--	--
molecular function	chemoattractant activity	0	0	--	--
molecular function	chemorepellent activity	0	0	--	--
molecular function	electron carrier activity	0.672782874617737	0.482573726541555	LOC103405700; LOC103417570; LOC103431008; LOC103437955; LOC103438505; LOC103440698; LOC103447336; LOC103447984; LOC103454322; LOC114826910; LOC114827739	LOC103403579; LOC103415736; LOC103416787; LOC103420850; LOC103421810; LOC103424916; LOC103425835; LOC103434783; LOC103450341
molecular function	enzyme regulator activity	1.71253822629969	1.55495978552279	LOC103401725; LOC103407277; LOC103408110; LOC103411620; LOC103418804; LOC103422296; LOC103422400; LOC103422633; LOC103423120; LOC103425102; LOC103429613; LOC103430626; LOC103432302; LOC103433682; LOC103434432; LOC103435740; LOC103439438; LOC103439474; LOC103440470; LOC103440985; LOC103444203; LOC103445588; LOC103445887; LOC103449469; LOC103450113; LOC103451559; LOC103453906; LOC114820557	LOC103400616; LOC103400911; LOC103408530; LOC103408753; LOC103413641; LOC103416950; LOC103417451; LOC103420592; LOC103420770; LOC103420967; LOC103420991; LOC103421465; LOC103431290; LOC103433915; LOC103433937; LOC103433972; LOC103435535; LOC103435871; LOC103436189; LOC103436449; LOC103438243; LOC103439337; LOC103440473; LOC103440602; LOC103448201; LOC103450885; LOC103456147; LOC114823685; LOC1148…
molecular function	metallochaperone activity	0.122324159021407	0.107238605898123	LOC103425927; LOC103452771	LOC103411985; LOC114823685
molecular function	molecular transducer activity	0.795107033639144	0.482573726541555	LOC103402202; LOC103404294; LOC103412999; LOC103415754; LOC103416597; LOC103418249; LOC103429045; LOC103429688; LOC103433682; LOC103436247; LOC103443399; LOC103445171; LOC103450068	LOC103405578; LOC103422017; LOC103428062; LOC103432575; LOC103439337; LOC103439584; LOC103449079; LOC103451518; LOC114820984
molecular function	morphogen activity	0	0	--	--
molecular function	nucleic acid binding transcription factor activity	8.37920489296636	6.86327077747989	GATA7; HD1; HD14; IAA9; LOC103400015; LOC103400844; LOC103400967; LOC103401207; LOC103401441; LOC103401682; LOC103402147; LOC103402159; LOC103402544; LOC103402722; LOC103402838; LOC103403690; LOC103403720; LOC103403972; LOC103404780; LOC103404881; LOC103405186; LOC103405189; LOC103405643; LOC103406741; LOC103407084; LOC103407153; LOC103409182; LOC103410574; LOC103410576; LOC103410709; LOC10341238…	ARF2; BZIP18; DOF7; GATA5; HD16; HD19; LOC103400372; LOC103400741; LOC103401390; LOC103402019; LOC103402675; LOC103402704; LOC103403008; LOC103403456; LOC103404107; LOC103404419; LOC103404939; LOC103405187; LOC103405327; LOC103405441; LOC103405834; LOC103405902; LOC103406245; LOC103406258; LOC103407637; LOC103407991; LOC103409518; LOC103411772; LOC103412644; LOC103412715; LOC103413206; LOC1034160…
molecular function	nutrient reservoir activity	0.305810397553517	0.107238605898123	LOC103401207; LOC103409144; LOC103415462; LOC103427535; LOC103431322	LOC103424622; LOC103451145
molecular function	protein binding transcription factor activity	0.305810397553517	0.697050938337802	LOC103405186; LOC103406741; LOC103406827; LOC103407598; LOC103418657	LOC103407596; LOC103416566; LOC103416613; LOC103416915; LOC103418693; LOC103423708; LOC103424136; LOC103426157; LOC103442866; LOC103445157; LOC103447099; LOC103449107; LOC103450955
molecular function	protein tag	0.0611620795107034	0.0536193029490617	LOC103445814	LOC103422995
molecular function	receptor activity	0.795107033639144	0.482573726541555	LOC103402202; LOC103404294; LOC103412999; LOC103415754; LOC103416597; LOC103418249; LOC103429045; LOC103429688; LOC103433682; LOC103436247; LOC103443399; LOC103445171; LOC103450068	LOC103405578; LOC103422017; LOC103428062; LOC103432575; LOC103439337; LOC103439584; LOC103449079; LOC103451518; LOC114820984
molecular function	receptor regulator activity	0.122324159021407	0.107238605898123	LOC103423988; LOC103455119	LOC103416593; LOC103422484
molecular function	structural molecule activity	1.34556574923547	1.12600536193029	LOC103401251; LOC103402133; LOC103405387; LOC103409996; LOC103416275; LOC103419217; LOC103423030; LOC103426925; LOC103428521; LOC103439551; LOC103439762; LOC103442125; LOC103444065; LOC103449858; LOC103452148; LOC108169236; LOC108173473; LOC108173996; LOC114819676; LOC114825635; LOC114826427; LOC114827465	LOC103412279; LOC103419116; LOC103422378; LOC103425081; LOC103428641; LOC103437167; LOC103438432; LOC103442228; LOC103442604; LOC103444862; LOC103447378; LOC103448040; LOC103452521; LOC103456043; LOC108169496; LOC108170670; LOC108170717; LOC108174222; LOC114819237; LOC114824725; LOC114827674
molecular function	translation regulator activity	0	0.0536193029490617	--	LOC108173315
molecular function	transporter activity	7.95107033639144	8.09651474530831	LOC103400678; LOC103400789; LOC103401243; LOC103401649; LOC103402020; LOC103402458; LOC103402615; LOC103403071; LOC103403689; LOC103404225; LOC103404375; LOC103404445; LOC103404470; LOC103404583; LOC103405169; LOC103405311; LOC103406454; LOC103406473; LOC103407259; LOC103407484; LOC103409678; LOC103410140; LOC103410295; LOC103410500; LOC103411043; LOC103412448; LOC103412500; LOC103412553; LOC1034…	LOC103400054; LOC103400207; LOC103401023; LOC103401951; LOC103402171; LOC103402588; LOC103402598; LOC103402630; LOC103402920; LOC103403308; LOC103404175; LOC103404434; LOC103404664; LOC103404717; LOC103404777; LOC103405038; LOC103405234; LOC103405649; LOC103408100; LOC103408740; LOC103409099; LOC103409428; LOC103410269; LOC103410555; LOC103411133; LOC103411554; LOC103411985; LOC103413722; LOC1034…
